# Supplementary material for: Noncoding Variants Connect Enhancer Dysregulation with Nuclear Receptor Signaling in Hematopoietic Malignancies
Source: Oxford University Press journal article supplement (doi:10.1158/2159-8290.cd-19-1128), 2020-03-18
Supplement: 21598290cd191128-sup-229452_2_supp_6126672_q6fh76.xlsx [file 21598290cd191128-sup-229452_2_supp_6126672_q6fh76.xlsx]

## Sheet: H3K27ac datasets
GEO	Study	Sample #	Normal Samples	Disease Samples
GSE16368	Bernstein BE et al., Nat. Biotechnol,. 2010	2	PBMC
GSE17312	Bernstein BE et al., Nat. Biotechnol,. 2010	14	Lymphocyte
GSE18927	Maurano MT et al., Science, 2012	6	Lymphocyte, Monocyte
GSE26320	Ernst J et al., Nature, 2011	4	B Lymphocyte (GM12878)	Erythroleukemia (K562)
GSE31621	Pham TH et al., Blood, 2012	2	Macrophage, Monocyte
GSE36354	Lin CY et al., Cell, 2012	1	B Lymphocyte
GSE36985	Xu J et al., Dev. Cell, 2012	2	Erythroblast
GSE43119	Schmidl C et al., Blood, 2014	10	T Lymphocyte
GSE46663	Chapuy B et al., Cancer Cell, 2013	10	B Lymphocyte	B-Lymphoma (DLBCL)
GSE50893	Kasowski M et al., Science, 2013	2	B Lymphocyte
GSE51522	Hnisz D et al., Cell, 2013	1		T-ALL (Jurkat)
GSE51800	Wang H et al., Proc. Natl. Acad. Sci. U.S.A., 2014	3		T-Lymphoma (CUTLL1)
GSE54380	Knoechel B et al., Nat. Genet., 2014	2		T-ALL (KOPT-K1, DND41)
GSE58310	Saeed S et al., Science, 2014	4	Macrophage, Monocyte
GSE58595	Weinstein JS et al., Blood, 2014	2	T Lymphocyte
GSE59657	Mansour MR et al., Blood, 2014	2		T-ALL (Jurkat, MOLT3)
GSE70660	Huang J et al., Dev Cell, 2016	2	HSPC (A0, F0)
GSE137652	This study	3		AML (THP1, HL60, MV4-11)
Total		72	51	21

## Sheet: H3K27ac samples
References	GSE	GSM	Biological Sources (Cells)	Normal/Cancer	Peak #	Top 30%
Bernstein BE, et al. Nat. Biotechnol. 2010	GSE16368	GSM1127145	Mononuclear; PBMC; Blood	N	14284	4285.2
Bernstein BE, et al. Nat. Biotechnol. 2010	GSE16368	GSM1127137	Mononuclear; PBMC; Blood	N	14394	4318.2
Bernstein BE, et al. Nat. Biotechnol. 2010	GSE17312	GSM772835	CD4 Naive Primary Cells	N	15059	4517.7
Bernstein BE, et al. Nat. Biotechnol. 2010	GSE17312	GSM772859	CD4+ CD25- CD45RO+ Memory Primary Cells	N	16355	4906.5
Bernstein BE, et al. Nat. Biotechnol. 2010	GSE17312	GSM772870	CD34 Primary Cells	N	24663	7398.9
Bernstein BE, et al. Nat. Biotechnol. 2010	GSE17312	GSM772905	CD4+ CD25- IL17- PMA-Ionomycin stimulated MACS purified Th Primary Cells	N	23622	7086.6
Bernstein BE, et al. Nat. Biotechnol. 2010	GSE17312	GSM772934	CD4 Naive Primary Cells	N	14735	4420.5
Bernstein BE, et al. Nat. Biotechnol. 2010	GSE17312	GSM772963	CD4 Memory Primary Cells	N	25294	7588.2
Bernstein BE, et al. Nat. Biotechnol. 2010	GSE17312	GSM772987	CD4+ CD25- IL17+ PMA-Ionomcyin stimulated Th17 Primary Cells	N	22455	6736.5
Bernstein BE, et al. Nat. Biotechnol. 2010	GSE17312	GSM772997	CD4 Memory Primary Cells	N	15251	4575.3
Bernstein BE, et al. Nat. Biotechnol. 2010	GSE17312	GSM773004	CD4+ CD25- CD45RA+ Naive Primary Cells	N	19014	5704.2
Bernstein BE, et al. Nat. Biotechnol. 2010	GSE17312	GSM997266	CD4+ CD25- IL17- PMA-Ionomycin stimulated MACS purified Th Primary Cells	N	19964	5989.2
Bernstein BE, et al. Nat. Biotechnol. 2010	GSE17312	GSM997239	CD4+ CD25- Th Primary Cells	N	13925	4177.5
Bernstein BE, et al. Nat. Biotechnol. 2010	GSE17312	GSM997260	CD4+ CD25int CD127+ Tmem Primary Cells	N	14012	4203.6
Bernstein BE, et al. Nat. Biotechnol. 2010	GSE17312	GSM997233	CD4+ CD25+ CD127- Treg Primary Cells	N	18284	5485.2
Bernstein BE, et al. Nat. Biotechnol. 2010	GSE17312	GSM916026	CD4+ CD25int CD127+ Tmem Primary Cells	N	16609	4982.7
Chapuy B, et al. Cancer Cell 2013	GSE46663	GSM1254194	DLBCL,DHL6	DLBCL	27854	8356.2
Chapuy B, et al. Cancer Cell 2013	GSE46663	GSM1254196	DLBCL,HBL1	DLBCL	37134	11140.2
Chapuy B, et al. Cancer Cell 2013	GSE46663	GSM1133646	DLBCL, LY1	DLBCL	36914	11074.2
Chapuy B, et al. Cancer Cell 2013	GSE46663	GSM1254198	DLBCL, LY3	DLBCL	44739	13421.7
Chapuy B, et al. Cancer Cell 2013	GSE46663	GSM1254200	DLBCL, LY4	DLBCL	44996	13498.8
Chapuy B, et al. Cancer Cell 2013	GSE46663	GSM1254202	DLBCL, TOLEDO	DLBCL	43187	12956.1
Chapuy B, et al. Cancer Cell 2013	GSE46663	GSM1254206	primary normal lymph node	N	32914	9874.2
Chapuy B, et al. Cancer Cell 2013	GSE46663	GSM1254208	primary normal tonsil	N	47398	14219.4
Chapuy B, et al. Cancer Cell 2013	GSE46663	GSM1254210	primary DLBCL, P265	DLBCL	32447	9734.1
Chapuy B, et al. Cancer Cell 2013	GSE46663	GSM1254214	primary DLBCL, P397	DLBCL	40590	12177
Ernst J, et al. Nature 2011	GSE26320	GSM646316	GM12878; Lymphoblastoid	N	33640	10092
Ernst J, et al. Nature 2011	GSE26320	GSM646317	GM12878; Lymphoblastoid	N	27504	8251.2
Ernst J, et al. Nature 2011	GSE26320	GSM646434	K562; Erythroleukemia	Erythroleukemia	32927	9878.1
Ernst J, et al. Nature 2011	GSE26320	GSM646435	K562; Erythroleukemia	Erythroleukemia	23168	6950.4
Hnisz D, et al. Cell 2013 FastQ	GSE51522	GSM1246865	Jurkat; T-ALL	T-ALL	38006	11401.8
Knoechel B, et al. Nat. Genet. 2014	GSE54380	GSM1314136	DND-41; T-ALL	T-ALL	45774	13732.2
Knoechel B, et al. Nat. Genet. 2014	GSE54380	GSM1314122	KOPT-K1; T-ALL	T-ALL	33545	10063.5
Lin CY, et al. Cell 2012	GSE36354	GSM894062	P493-6; B Lymphocyte	N	44592	13377.6
Maurano MT, et al. Science 2012	GSE18927	GSM1027287	B Lymphocyte; CD19+; Spleen	N	22179	6653.7
Maurano MT, et al. Science 2012	GSE18927	GSM1027288	CD56+; Blood	N	28788	8636.4
Maurano MT, et al. Science 2012	GSE18927	GSM1027289	Fetal Thymus	N	37478	11243.4
Maurano MT, et al. Science 2012	GSE18927	GSM1102782	Monocyte; CD14+; Blood	N	28380	8514
Maurano MT, et al. Science 2012	GSE18927	GSM1058764	T Lymphocyte; CD3+; Blood	N	23068	6920.4
Maurano MT, et al. Science 2012	GSE18927	GSM1102781	T Lymphocyte; CD8+; Blood	N	23034	6910.2
Pham TH, et al. Blood 2012	GSE31621	GSM785500	Macrophage	N	48405	14521.5
Pham TH, et al. Blood 2012	GSE31621	GSM785494	Monocyte	N	36955	11086.5
Saeed S, et al. Science 2014	GSE58310	GSM1406311	Macrophage	N	22801	6840.3
Saeed S, et al. Science 2014	GSE58310	GSM1406298	Macrophage	N	35682	10704.6
Saeed S, et al. Science 2014	GSE58310	GSM1406308	Monocyte	N	17684	5305.2
Saeed S, et al. Science 2014	GSE58310	GSM1406295	Monocyte	N	31998	9599.4
Schmidl C, et al. Blood 2014	GSE43119	GSM1056919	T Lymphocyte; Treg	N	28945	8683.5
Schmidl C, et al. Blood 2014	GSE43119	GSM1056920	T Lymphocyte; T conventional	N	28965	8689.5
Schmidl C, et al. Blood 2014	GSE43119	GSM1056940	T Lymphocyte; Treg	N	26193	7857.9
Schmidl C, et al. Blood 2014	GSE43119	GSM1056941	T Lymphocyte; Treg	N	30351	9105.3
Schmidl C, et al. Blood 2014	GSE43119	GSM1056942	T Lymphocyte; T conventional	N	27582	8274.6
Schmidl C, et al. Blood 2014	GSE43119	GSM1056943	T Lymphocyte; T conventional	N	25644	7693.2
Schmidl C, et al. Blood 2014	GSE43119	GSM1056948	T Lymphocyte; Treg	N	13910	4173
Schmidl C, et al. Blood 2014	GSE43119	GSM1056949	T Lymphocyte; Treg	N	31952	9585.6
Schmidl C, et al. Blood 2014	GSE43119	GSM1056950	T Lymphocyte; T conventional	N	27566	8269.8
Schmidl C, et al. Blood 2014	GSE43119	GSM1056951	T Lymphocyte; T conventional	N	29207	8762.1
Wang H, et al. Proc. Natl. Acad. Sci. U.S.A. 2014	GSE51800	GSM1252938	CUTLL1; T Lymphoma	T-Lymphoma	32971	9891.3
Wang H, et al. Proc. Natl. Acad. Sci. U.S.A. 2014	GSE51800	GSM1252939	CUTLL1; T Lymphoma	T-Lymphoma	40528	12158.4
Wang H, et al. Proc. Natl. Acad. Sci. U.S.A. 2014	GSE51800	GSM1252940	CUTLL1; T Lymphoma	T-Lymphoma	44945	13483.5
Weinstein JS, et al. Blood 2014	GSE58595	GSM1414734	T Lymphocyte; Tonsil	N	24172	7251.6
Weinstein JS, et al. Blood 2014	GSE58595	GSM1414738	T Lymphocyte; Tonsil	N	22022	6606.6
Xu J, et al. Dev. Cell 2012	GSE36985	GSM908050	Proerythroblast; CD34+; Fetal Liver	N	27476	8242.8
Xu J, et al. Dev. Cell 2012	GSE36985	GSM908051	Proerythroblast; CD34+; Bone Marrow	N	28053	8415.9
Huang J et al. Dev Cell, 2016	GSE70660	GSM1816075	CD34+ HSPC (A0)	N	39580	11874
Huang J et al. Dev Cell, 2016	GSE70660	GSM1816073	CD34+ HSPC (F0)	N	44968	13490.4
Mansour, Science, 2014	GSE59657	GSM1519642	Jurkat; T-ALL	T-ALL	33899	10169.7
Mansour, Science, 2014	GSE59657	GSM1519644	MOLT3; T-ALL	T-ALL	36319	10895.7
Kasowski M, et al. Science 2013	GSE50893	GSM1233872	GM10847; Lymphoblastoid; Blood	N	39887	11966.1
Kasowski M, et al. Science 2013	GSE50893	GSM1234220	MS1; Lymphoblastoid	N	38641	11592.3
This study	GSE137652	GSM4083810	THP1; AML	AML	24724	7417
This study	GSE137652	GSM4083802	HL60; AML	AML	24648	7394
This study	GSE137652	GSM4083808	MV4-11; AML	AML	35393	10617

## Sheet: other genomic datasets 
Datasets	Data Type	Cell Type	GEO ID	Citation
ChIP-seq_MKPL-1_PPARG	ChIP-seq	MKPL-1	GSM4083800	This study
ChIP-seq_MKPL-1_RXRA	ChIP-seq	MKPL-1	GSM4083801	This study
ChIP-seq_HL60_H3K27ac	ChIP-seq	HL60	GSM4083802	This study
ChIP-seq_K562_H3K27ac	ChIP-seq	K562	GSM4083804	This study
ChIP-seq_MKPL-1_H3K27ac	ChIP-seq	MKPL-1	GSM4083806	This study
ChIP-seq_MV4-11_H3K27ac	ChIP-seq	MV4-11	GSM4083808	This study
ChIP-seq_THP1_H3K27ac	ChIP-seq	THP1	GSM4083810	This study
ChIP-seq_U937_H3K27ac	ChIP-seq	U937	GSM4083812	This study
ATAC-seq_K562	ATAC-seq	K562	GSM4083680	This study
ATAC-seq_MKPL-1	ATAC-seq	MKPL-1	GSM4083681	This study
ATAC-seq_MV4-11	ATAC-seq	MV4-11	GSM4083682	This study
ATAC-seq_NB4	ATAC-seq	NB4	GSM4083683	This study
ATAC-seq_U937	ATAC-seq	U937	GSM4083684	This study
0100	Targeted sequencing	Leukemia	GSM3585391	This study
0101	Targeted sequencing	Leukemia	GSM3585392	This study
2949	Targeted sequencing	Leukemia	GSM3585393	This study
2966	Targeted sequencing	Leukemia	GSM3585394	This study
2990T	Targeted sequencing	Leukemia	GSM3585395	This study
3004	Targeted sequencing	Leukemia	GSM3585396	This study
3095	Targeted sequencing	Leukemia	GSM3585397	This study
3101	Targeted sequencing	Leukemia	GSM3585398	This study
3106	Targeted sequencing	Leukemia	GSM3585399	This study
3139	Targeted sequencing	Leukemia	GSM3585400	This study
3171	Targeted sequencing	Leukemia	GSM3585401	This study
3173	Targeted sequencing	Leukemia	GSM3585402	This study
3175	Targeted sequencing	Leukemia	GSM3585403	This study
3208	Targeted sequencing	Leukemia	GSM3585404	This study
3230T	Targeted sequencing	Leukemia	GSM3585405	This study
3236T-MDS	Targeted sequencing	Leukemia	GSM3585406	This study
3255T	Targeted sequencing	Leukemia	GSM3585407	This study
3279	Targeted sequencing	Leukemia	GSM3585408	This study
3324	Targeted sequencing	Leukemia	GSM3585409	This study
3348T	Targeted sequencing	Leukemia	GSM3585410	This study
3365	Targeted sequencing	Leukemia	GSM3585411	This study
3373T	Targeted sequencing	Leukemia	GSM3585412	This study
3450T	Targeted sequencing	Leukemia	GSM3585413	This study
3491T	Targeted sequencing	Leukemia	GSM3585414	This study
3496T-MDS	Targeted sequencing	Leukemia	GSM3585415	This study
3573	Targeted sequencing	Leukemia	GSM3585416	This study
3624	Targeted sequencing	Leukemia	GSM3585417	This study
3644T	Targeted sequencing	Leukemia	GSM3585418	This study
3678T	Targeted sequencing	Leukemia	GSM3585419	This study
3710	Targeted sequencing	Leukemia	GSM3585420	This study
3749	Targeted sequencing	Leukemia	GSM3585421	This study
3753	Targeted sequencing	Leukemia	GSM3585422	This study
3938T	Targeted sequencing	Leukemia	GSM3585423	This study
3953T	Targeted sequencing	Leukemia	GSM3585424	This study
3966T	Targeted sequencing	Leukemia	GSM3585425	This study
4009	Targeted sequencing	Leukemia	GSM3585426	This study
4143T	Targeted sequencing	Leukemia	GSM3585427	This study
4212T	Targeted sequencing	Leukemia	GSM3585428	This study
4229T	Targeted sequencing	Leukemia	GSM3585429	This study
4233T	Targeted sequencing	Leukemia	GSM3585430	This study
4245T	Targeted sequencing	Leukemia	GSM3585431	This study
4267	Targeted sequencing	Leukemia	GSM3585432	This study
4274T	Targeted sequencing	Leukemia	GSM3585433	This study
4293T	Targeted sequencing	Leukemia	GSM3585434	This study
4358	Targeted sequencing	Leukemia	GSM3585435	This study
4363T	Targeted sequencing	Leukemia	GSM3585436	This study
4404T	Targeted sequencing	Leukemia	GSM3585437	This study
4409	Targeted sequencing	Leukemia	GSM3585438	This study
4459	Targeted sequencing	Leukemia	GSM3585439	This study
4467T	Targeted sequencing	Leukemia	GSM3585440	This study
4528T-CD14	Targeted sequencing	Leukemia	GSM3585441	This study
4528T-CD34	Targeted sequencing	Leukemia	GSM3585442	This study
4535T-CD14	Targeted sequencing	Leukemia	GSM3585443	This study
4535T-CD34	Targeted sequencing	Leukemia	GSM3585444	This study
4696T	Targeted sequencing	Leukemia	GSM3585445	This study
4715T	Targeted sequencing	Leukemia	GSM3585446	This study
4799T	Targeted sequencing	Leukemia	GSM3585447	This study
4861T	Targeted sequencing	Leukemia	GSM3585448	This study
4864T	Targeted sequencing	Leukemia	GSM3585449	This study
MKPL-1	Targeted sequencing	Leukemia	GSM3585450	This study
BC-2	Targeted sequencing	Leukemia	GSM3585451	This study
CD34-HSPC-2008	Targeted sequencing	Normal	GSM3585452	This study
CD34-HSPC-2015	Targeted sequencing	Normal	GSM3585453	This study
Ctrl-17	Targeted sequencing	Control gDNA	GSM3585454	This study
Farage	Targeted sequencing	Leukemia	GSM3585455	This study
GDM1	Targeted sequencing	Leukemia	GSM3585456	This study
HL60	Targeted sequencing	Leukemia	GSM3585457	This study
HuT78	Targeted sequencing	Leukemia	GSM3585458	This study
Jurkat	Targeted sequencing	Leukemia	GSM3585459	This study
K562	Targeted sequencing	Leukemia	GSM3585460	This study
Karpas	Targeted sequencing	Leukemia	GSM3585461	This study
Kasumi-2	Targeted sequencing	Leukemia	GSM3585462	This study
Loucy	Targeted sequencing	Leukemia	GSM3585463	This study
MV-4-11	Targeted sequencing	Leukemia	GSM3585464	This study
NB4	Targeted sequencing	Leukemia	GSM3585465	This study
OCI-LY3	Targeted sequencing	Leukemia	GSM3585466	This study
OCI-LY7	Targeted sequencing	Leukemia	GSM3585467	This study
Pfeiffer	Targeted sequencing	Leukemia	GSM3585468	This study
Raji	Targeted sequencing	Leukemia	GSM3585469	This study
RCH-ACV	Targeted sequencing	Leukemia	GSM3585470	This study
REH	Targeted sequencing	Leukemia	GSM3585471	This study
Ri-1	Targeted sequencing	Leukemia	GSM3585472	This study
SU-DHL-10	Targeted sequencing	Leukemia	GSM3585473	This study
SU-DHL-4	Targeted sequencing	Leukemia	GSM3585474	This study
SU-DHL-6	Targeted sequencing	Leukemia	GSM3585475	This study
THP-1	Targeted sequencing	Leukemia	GSM3585476	This study
Toledo	Targeted sequencing	Leukemia	GSM3585477	This study
U266B1	Targeted sequencing	Leukemia	GSM3585478	This study
U2932	Targeted sequencing	Leukemia	GSM3585479	This study
U937	Targeted sequencing	Leukemia	GSM3585480	This study
WSU-DLCL2	Targeted sequencing	Leukemia	GSM3585481	This study
2990N	Targeted sequencing	Normal	GSM3585482	This study
3230N	Targeted sequencing	Normal	GSM3585483	This study
3236N	Targeted sequencing	Normal	GSM3585484	This study
3255N	Targeted sequencing	Normal	GSM3585485	This study
3348N	Targeted sequencing	Normal	GSM3585486	This study
3373N	Targeted sequencing	Normal	GSM3585487	This study
3450N	Targeted sequencing	Normal	GSM3585488	This study
3491N	Targeted sequencing	Normal	GSM3585489	This study
3496N	Targeted sequencing	Normal	GSM3585490	This study
3644N	Targeted sequencing	Normal	GSM3585491	This study
3678N	Targeted sequencing	Normal	GSM3585492	This study
3938N	Targeted sequencing	Normal	GSM3585493	This study
3966N	Targeted sequencing	Normal	GSM3585494	This study
4143N	Targeted sequencing	Normal	GSM3585495	This study
4212N	Targeted sequencing	Normal	GSM3585496	This study
4229N	Targeted sequencing	Normal	GSM3585497	This study
4233N	Targeted sequencing	Normal	GSM3585498	This study
4274N	Targeted sequencing	Normal	GSM3585499	This study
4293N	Targeted sequencing	Normal	GSM3585500	This study
4363N	Targeted sequencing	Normal	GSM3585501	This study
4404N	Targeted sequencing	Normal	GSM3585502	This study
4467N	Targeted sequencing	Normal	GSM3585503	This study
4528N	Targeted sequencing	Normal	GSM3585504	This study
4535N	Targeted sequencing	Normal	GSM3585505	This study
4696N	Targeted sequencing	Normal	GSM3585506	This study
4715N	Targeted sequencing	Normal	GSM3585507	This study
4799N	Targeted sequencing	Normal	GSM3585508	This study
4861N	Targeted sequencing	Normal	GSM3585509	This study
4864N	Targeted sequencing	Normal	GSM3585510	This study
ChIP-seq_CD34_HSPC_H3K27ac	ChIP-seq	HSPC	GSM1816075	Huang et al, Dev Cell 2016
ChIP-seq_HepG2_RXRA	ChIP-seq	HepG2	GSM803452	Pope et al, Nature 2014
ChIP-seq_HepG2_PPARG	ChIP-seq	HepG2	GSM2527505	ENCODE
ChIP-seq_HT29_PPARG	ChIP-seq	HT29	GSM2042856	Savic et al, Genome Med 2016
ChIA-PET_K562_RNAPII	ChIA-PET	K562	GSM970213	ENCODE
Hi-C_K562	Hi-C	K562	GSE63525	Rao et al, Cell 2014
Hi-C_CD34_HSPC	Hi-C	CD34+ HSPC	GSM2861708	https://doi.org/10.1101/212928
Hi-C_THP1	Hi-C	THP1	PRJNA385337	Phanstiel et al, Mol Cell 2017
