# Supplementary material for: Noncoding Variants Connect Enhancer Dysregulation with Nuclear Receptor Signaling in Hematopoietic Malignancies
Source: Oxford University Press journal article supplement (doi:10.1158/2159-8290.cd-19-1128), 2020-03-18
Supplement: 21598290cd191128-sup-229452_2_supp_6126673_q6fh76.xlsx [file 21598290cd191128-sup-229452_2_supp_6126673_q6fh76.xlsx]

## Sheet: CREs
Chromosome	Start	End	CRE ID
chr1	9798	10761	CRE1
chr1	28799	29567	CRE2
chr1	68829	69621	CRE3
chr1	713554	714799	CRE4
chr1	726617	727319	CRE5
chr1	762077	763234	CRE6
chr1	777537	778286	CRE7
chr1	824721	825423	CRE8
chr1	839977	840981	CRE9
chr1	893716	894892	CRE10
chr1	901581	902594	CRE11
chr1	948319	949333	CRE12
chr1	954696	955588	CRE13
chr1	1004223	1005008	CRE14
chr1	1014654	1015362	CRE15
chr1	1045050	1045880	CRE16
chr1	1050846	1051761	CRE17
chr1	1070310	1071048	CRE18
chr1	1079594	1080493	CRE19
chr1	1092927	1094120	CRE20
chr1	1148391	1149125	CRE21
chr1	1166603	1167413	CRE22
chr1	1167692	1168416	CRE23
chr1	1185446	1186431	CRE24
chr1	1208405	1209936	CRE25
chr1	1240620	1241329	CRE26
chr1	1243268	1244024	CRE27
chr1	1259558	1260423	CRE28
chr1	1284166	1285448	CRE29
chr1	1310256	1311394	CRE30
chr1	1334184	1335558	CRE31
chr1	1342199	1343228	CRE32
chr1	1406513	1407555	CRE33
chr1	1440454	1441211	CRE34
chr1	1446615	1447503	CRE35
chr1	1509572	1510808	CRE36
chr1	1541982	1542918	CRE37
chr1	1550612	1551431	CRE38
chr1	1565672	1566460	CRE39
chr1	1590130	1591301	CRE40
chr1	1609072	1609936	CRE41
chr1	1623949	1624873	CRE42
chr1	1655448	1656340	CRE43
chr1	1676288	1677009	CRE44
chr1	1677299	1678358	CRE45
chr1	1709202	1709965	CRE46
chr1	1711001	1711740	CRE47
chr1	1764993	1765756	CRE48
chr1	1821301	1822017	CRE49
chr1	1822343	1823083	CRE50
chr1	1839690	1840598	CRE51
chr1	1850181	1850943	CRE52
chr1	1927134	1928333	CRE53
chr1	1980982	1981845	CRE54
chr1	2064037	2064962	CRE55
chr1	2120621	2121492	CRE56
chr1	2126028	2127038	CRE57
chr1	2158541	2159343	CRE58
chr1	2177572	2178449	CRE59
chr1	2221453	2222204	CRE60
chr1	2231853	2232734	CRE61
chr1	2245929	2247502	CRE62
chr1	2323020	2323844	CRE63
chr1	2344028	2345089	CRE64
chr1	2457536	2458319	CRE65
chr1	2478702	2479445	CRE66
chr1	2479474	2480207	CRE67
chr1	2487548	2488686	CRE68
chr1	2508997	2510490	CRE69
chr1	2517021	2518176	CRE70
chr1	2573939	2574915	CRE71
chr1	2628882	2629586	CRE72
chr1	3087070	3087882	CRE73
chr1	3232857	3233827	CRE74
chr1	3541014	3542304	CRE75
chr1	3566001	3566871	CRE76
chr1	3593585	3594297	CRE77
chr1	3663220	3664185	CRE78
chr1	3712423	3713611	CRE79
chr1	3759358	3760149	CRE80
chr1	3773379	3774518	CRE81
chr1	3797233	3797967	CRE82
chr1	3816659	3818056	CRE83
chr1	4237202	4237958	CRE84
chr1	4362832	4363680	CRE85
chr1	4439575	4440280	CRE86
chr1	4506413	4507406	CRE87
chr1	5977800	5978542	CRE88
chr1	6035641	6036370	CRE89
chr1	6051772	6052763	CRE90
chr1	6086233	6087165	CRE91
chr1	6087793	6088858	CRE92
chr1	6259156	6260375	CRE93
chr1	6295307	6296597	CRE94
chr1	6453558	6454521	CRE95
chr1	6550449	6551256	CRE96
chr1	6613968	6615152	CRE97
chr1	6639574	6640904	CRE98
chr1	6662184	6663120	CRE99
chr1	6672590	6673736	CRE100
chr1	6673840	6674665	CRE101
chr1	6685008	6685794	CRE102
chr1	6761062	6762145	CRE103
chr1	6803180	6804276	CRE104
chr1	6844088	6845159	CRE105
chr1	7740082	7741052	CRE106
chr1	7830813	7832065	CRE107
chr1	7843688	7844481	CRE108
chr1	7886893	7887943	CRE109
chr1	8013794	8014853	CRE110
chr1	8020985	8022278	CRE111
chr1	8053775	8054482	CRE112
chr1	8097323	8098075	CRE113
chr1	8157008	8157750	CRE114
chr1	8187101	8187837	CRE115
chr1	8212612	8213530	CRE116
chr1	8229219	8230188	CRE117
chr1	8483123	8484034	CRE118
chr1	8487696	8488526	CRE119
chr1	8585103	8586193	CRE120
chr1	8772476	8773787	CRE121
chr1	8877119	8878266	CRE122
chr1	8937998	8938937	CRE123
chr1	8939269	8940351	CRE124
chr1	9097014	9097733	CRE125
chr1	9128839	9129876	CRE126
chr1	9142915	9143628	CRE127
chr1	9153154	9154287	CRE128
chr1	9188582	9189307	CRE129
chr1	9202955	9203741	CRE130
chr1	9223548	9224253	CRE131
chr1	9294337	9295569	CRE132
chr1	9339342	9340144	CRE133
chr1	9459657	9460526	CRE134
chr1	9488594	9489576	CRE135
chr1	9599499	9600423	CRE136
chr1	9648336	9649405	CRE137
chr1	9689960	9690715	CRE138
chr1	9711404	9712314	CRE139
chr1	9713960	9714674	CRE140
chr1	9747342	9748371	CRE141
chr1	9776920	9778612	CRE142
chr1	9846801	9848277	CRE143
chr1	9883326	9884231	CRE144
chr1	9952775	9953511	CRE145
chr1	9960455	9961404	CRE146
chr1	9969790	9971493	CRE147
chr1	10002865	10004035	CRE148
chr1	10010369	10011276	CRE149
chr1	10020759	10021479	CRE150
chr1	10092102	10093737	CRE151
chr1	10249596	10250365	CRE152
chr1	10269924	10271441	CRE153
chr1	10458584	10459524	CRE154
chr1	10490030	10491215	CRE155
chr1	10532734	10533582	CRE156
chr1	10534768	10535756	CRE157
chr1	10554901	10556117	CRE158
chr1	10570328	10571197	CRE159
chr1	10637209	10637986	CRE160
chr1	10753599	10754405	CRE161
chr1	10884396	10885215	CRE162
chr1	11072007	11073075	CRE163
chr1	11119431	11120911	CRE164
chr1	11159373	11160431	CRE165
chr1	11322135	11323325	CRE166
chr1	11333027	11334157	CRE167
chr1	11467614	11468329	CRE168
chr1	11538684	11539450	CRE169
chr1	11714498	11715315	CRE170
chr1	11724234	11725177	CRE171
chr1	11740686	11742251	CRE172
chr1	11779111	11780027	CRE173
chr1	11796119	11796829	CRE174
chr1	11865359	11866764	CRE175
chr1	11874619	11875475	CRE176
chr1	11967909	11968967	CRE177
chr1	11986042	11986993	CRE178
chr1	11989521	11990301	CRE179
chr1	11994215	11995349	CRE180
chr1	12020966	12021726	CRE181
chr1	12040150	12041049	CRE182
chr1	12079064	12080199	CRE183
chr1	12210775	12211505	CRE184
chr1	12244362	12245066	CRE185
chr1	12289876	12290936	CRE186
chr1	12404590	12405350	CRE187
chr1	12509729	12510626	CRE188
chr1	12533542	12534244	CRE189
chr1	12570377	12571085	CRE190
chr1	12677810	12678536	CRE191
chr1	13805699	13806743	CRE192
chr1	14026182	14027194	CRE193
chr1	14049926	14050635	CRE194
chr1	14056621	14057362	CRE195
chr1	14075043	14076454	CRE196
chr1	14647660	14648722	CRE197
chr1	14660943	14661695	CRE198
chr1	15103747	15104466	CRE199
chr1	15578861	15579669	CRE200
chr1	15735839	15737743	CRE201
chr1	15850828	15851583	CRE202
chr1	15853092	15853800	CRE203
chr1	15929591	15930606	CRE204
chr1	15943973	15945110	CRE205
chr1	16010110	16011305	CRE206
chr1	16023052	16024248	CRE207
chr1	16160379	16162282	CRE208
chr1	16173426	16174224	CRE209
chr1	16174350	16175665	CRE210
chr1	16212395	16213107	CRE211
chr1	16302048	16302987	CRE212
chr1	16358047	16358802	CRE213
chr1	16499628	16500386	CRE214
chr1	16533078	16534071	CRE215
chr1	16563230	16564249	CRE216
chr1	16678495	16679472	CRE217
chr1	16693484	16694657	CRE218
chr1	16766768	16767691	CRE219
chr1	16825389	16826374	CRE220
chr1	16840144	16841560	CRE221
chr1	16939578	16940314	CRE222
chr1	16970794	16971642	CRE223
chr1	16993203	16993971	CRE224
chr1	17066483	17067246	CRE225
chr1	17215329	17216490	CRE226
chr1	17221664	17223228	CRE227
chr1	17230882	17231763	CRE228
chr1	17240067	17241178	CRE229
chr1	17379730	17380792	CRE230
chr1	17386478	17387263	CRE231
chr1	17407603	17408314	CRE232
chr1	17424363	17425073	CRE233
chr1	17454895	17455645	CRE234
chr1	17764434	17765277	CRE235
chr1	17765361	17766220	CRE236
chr1	19133910	19134670	CRE237
chr1	19228756	19229598	CRE238
chr1	19234048	19234806	CRE239
chr1	19253179	19254178	CRE240
chr1	19283219	19284001	CRE241
chr1	19407610	19408414	CRE242
chr1	19536255	19537581	CRE243
chr1	19577398	19578549	CRE244
chr1	19638042	19639242	CRE245
chr1	19652136	19652941	CRE246
chr1	19803439	19804146	CRE247
chr1	19811454	19812607	CRE248
chr1	19831731	19832462	CRE249
chr1	19922855	19924150	CRE250
chr1	20126250	20127007	CRE251
chr1	20208404	20209576	CRE252
chr1	20478406	20479278	CRE253
chr1	20513288	20514396	CRE254
chr1	20575175	20575879	CRE255
chr1	20648723	20649544	CRE256
chr1	20833802	20834886	CRE257
chr1	20959951	20961216	CRE258
chr1	20987452	20988523	CRE259
chr1	21022867	21023726	CRE260
chr1	21112583	21113309	CRE261
chr1	21113733	21114467	CRE262
chr1	21348731	21349696	CRE263
chr1	21502037	21503849	CRE264
chr1	21671630	21672798	CRE265
chr1	21754303	21755023	CRE266
chr1	21766072	21767073	CRE267
chr1	21952423	21953153	CRE268
chr1	21958237	21958938	CRE269
chr1	22094988	22095696	CRE270
chr1	22109519	22110340	CRE271
chr1	22118327	22119060	CRE272
chr1	22345258	22346166	CRE273
chr1	22351787	22352653	CRE274
chr1	22366337	22367255	CRE275
chr1	22378757	22379597	CRE276
chr1	22755104	22755817	CRE277
chr1	22778321	22779142	CRE278
chr1	23036828	23037537	CRE279
chr1	23345360	23346882	CRE280
chr1	23494587	23495546	CRE281
chr1	23504087	23504825	CRE282
chr1	23554801	23555557	CRE283
chr1	23670931	23671770	CRE284
chr1	23694774	23695606	CRE285
chr1	23748423	23749245	CRE286
chr1	23823589	23824592	CRE287
chr1	23856362	23857929	CRE288
chr1	23880504	23881607	CRE289
chr1	23886013	23886852	CRE290
chr1	23961456	23962258	CRE291
chr1	24018239	24019171	CRE292
chr1	24069332	24070300	CRE293
chr1	24104284	24105297	CRE294
chr1	24117208	24118082	CRE295
chr1	24126114	24128109	CRE296
chr1	24151469	24152271	CRE297
chr1	24194370	24195283	CRE298
chr1	24235504	24236247	CRE299
chr1	24285280	24287233	CRE300
chr1	24306469	24307594	CRE301
chr1	24717819	24718917	CRE302
chr1	24807296	24808366	CRE303
chr1	24828433	24829683	CRE304
chr1	24861394	24862303	CRE305
chr1	24968761	24969660	CRE306
chr1	25031989	25032695	CRE307
chr1	25059121	25060088	CRE308
chr1	25071845	25073011	CRE309
chr1	25174475	25175516	CRE310
chr1	25198550	25199364	CRE311
chr1	25255459	25256462	CRE312
chr1	25256748	25257558	CRE313
chr1	25348882	25349680	CRE314
chr1	25457902	25458612	CRE315
chr1	25558528	25559628	CRE316
chr1	25565945	25566943	CRE317
chr1	25573364	25574221	CRE318
chr1	25593118	25594878	CRE319
chr1	25656684	25657490	CRE320
chr1	25663939	25665440	CRE321
chr1	25756737	25757940	CRE322
chr1	25869881	25870585	CRE323
chr1	25942527	25943280	CRE324
chr1	26005204	26006026	CRE325
chr1	26126107	26126817	CRE326
chr1	26146082	26147019	CRE327
chr1	26185431	26186811	CRE328
chr1	26187764	26188469	CRE329
chr1	26201519	26202642	CRE330
chr1	26231367	26232776	CRE331
chr1	26260081	26260880	CRE332
chr1	26297989	26298718	CRE333
chr1	26316689	26317883	CRE334
chr1	26323833	26324715	CRE335
chr1	26361757	26362800	CRE336
chr1	26396447	26397172	CRE337
chr1	26437420	26439302	CRE338
chr1	26452393	26454285	CRE339
chr1	26496063	26497217	CRE340
chr1	26560442	26561560	CRE341
chr1	26585858	26586684	CRE342
chr1	26605938	26607101	CRE343
chr1	26615654	26616537	CRE344
chr1	26633127	26634103	CRE345
chr1	26663218	26663993	CRE346
chr1	26704494	26705294	CRE347
chr1	26758597	26759515	CRE348
chr1	26798132	26799604	CRE349
chr1	26827000	26828194	CRE350
chr1	26855636	26856798	CRE351
chr1	26868064	26869340	CRE352
chr1	26925348	26926139	CRE353
chr1	26946851	26948629	CRE354
chr1	26954496	26955197	CRE355
chr1	26962940	26963661	CRE356
chr1	26974366	26975179	CRE357
chr1	27018845	27019671	CRE358
chr1	27070597	27071546	CRE359
chr1	27113875	27114696	CRE360
chr1	27152559	27153703	CRE361
chr1	27191652	27192485	CRE362
chr1	27216302	27217312	CRE363
chr1	27226498	27227438	CRE364
chr1	27247655	27249030	CRE365
chr1	27328397	27329152	CRE366
chr1	27463205	27464069	CRE367
chr1	27481156	27482204	CRE368
chr1	27487794	27488852	CRE369
chr1	27560236	27561746	CRE370
chr1	27579950	27580913	CRE371
chr1	27626101	27627077	CRE372
chr1	27648523	27649483	CRE373
chr1	27668321	27670166	CRE374
chr1	27762531	27763270	CRE375
chr1	27816274	27817403	CRE376
chr1	27849019	27849983	CRE377
chr1	27852050	27852812	CRE378
chr1	27929988	27930942	CRE379
chr1	27944070	27945035	CRE380
chr1	27985719	27986805	CRE381
chr1	27988941	27989758	CRE382
chr1	27998126	27999270	CRE383
chr1	28051569	28053451	CRE384
chr1	28099595	28100582	CRE385
chr1	28156847	28157842	CRE386
chr1	28211617	28212323	CRE387
chr1	28240335	28241712	CRE388
chr1	28285986	28286808	CRE389
chr1	28414312	28415405	CRE390
chr1	28453670	28454530	CRE391
chr1	28558912	28559757	CRE392
chr1	28562142	28563025	CRE393
chr1	28572857	28573869	CRE394
chr1	28574569	28575308	CRE395
chr1	28585140	28586769	CRE396
chr1	28655508	28656502	CRE397
chr1	28678503	28679223	CRE398
chr1	28695783	28696929	CRE399
chr1	28831731	28832583	CRE400
chr1	28844478	28845317	CRE401
chr1	28879042	28880075	CRE402
chr1	28908025	28909067	CRE403
chr1	28969650	28970469	CRE404
chr1	28974238	28975364	CRE405
chr1	28994455	28996330	CRE406
chr1	29062773	29064286	CRE407
chr1	29101378	29102521	CRE408
chr1	29213047	29214200	CRE409
chr1	29240187	29241592	CRE410
chr1	29312462	29313602	CRE411
chr1	29507750	29508616	CRE412
chr1	29528771	29529483	CRE413
chr1	29536656	29537412	CRE414
chr1	29556964	29557907	CRE415
chr1	31148083	31148910	CRE416
chr1	31191348	31192397	CRE417
chr1	31229741	31230663	CRE418
chr1	31296847	31297557	CRE419
chr1	31391848	31392587	CRE420
chr1	31537756	31539032	CRE421
chr1	31573344	31574251	CRE422
chr1	31627344	31628756	CRE423
chr1	31643281	31644427	CRE424
chr1	31768666	31770471	CRE425
chr1	31886040	31886762	CRE426
chr1	31904390	31905159	CRE427
chr1	31955358	31956374	CRE428
chr1	31971648	31972589	CRE429
chr1	32014584	32015744	CRE430
chr1	32045459	32046167	CRE431
chr1	32109985	32110892	CRE432
chr1	32229528	32230681	CRE433
chr1	32253844	32254993	CRE434
chr1	32292189	32293359	CRE435
chr1	32313907	32315025	CRE436
chr1	32354670	32355545	CRE437
chr1	32394482	32395225	CRE438
chr1	32403932	32404686	CRE439
chr1	32410022	32410730	CRE440
chr1	32450752	32451472	CRE441
chr1	32478548	32480072	CRE442
chr1	32538089	32539256	CRE443
chr1	32573258	32574312	CRE444
chr1	32645260	32646463	CRE445
chr1	32651316	32652054	CRE446
chr1	32665665	32666717	CRE447
chr1	32671097	32671965	CRE448
chr1	32687629	32688511	CRE449
chr1	32705928	32706669	CRE450
chr1	32715127	32715857	CRE451
chr1	32739667	32740390	CRE452
chr1	32757008	32758228	CRE453
chr1	32800815	32801986	CRE454
chr1	32816723	32817729	CRE455
chr1	32859649	32860793	CRE456
chr1	32879157	32879957	CRE457
chr1	32897640	32898380	CRE458
chr1	32965618	32966865	CRE459
chr1	32986070	32986784	CRE460
chr1	33004889	33005597	CRE461
chr1	33077339	33078102	CRE462
chr1	33115988	33116782	CRE463
chr1	33190920	33191645	CRE464
chr1	33282130	33282964	CRE465
chr1	33283075	33283788	CRE466
chr1	33429518	33430920	CRE467
chr1	33446584	33447460	CRE468
chr1	33501784	33502732	CRE469
chr1	33564413	33565906	CRE470
chr1	33585591	33586299	CRE471
chr1	33592469	33593654	CRE472
chr1	33646587	33647730	CRE473
chr1	33722165	33723076	CRE474
chr1	33814935	33816399	CRE475
chr1	33862230	33862983	CRE476
chr1	33937460	33938902	CRE477
chr1	34712814	34713520	CRE478
chr1	35324793	35325953	CRE479
chr1	35331142	35332339	CRE480
chr1	35450152	35451336	CRE481
chr1	35496665	35497664	CRE482
chr1	35544575	35545471	CRE483
chr1	35586025	35586840	CRE484
chr1	35627405	35628269	CRE485
chr1	35657731	35658800	CRE486
chr1	35734087	35735153	CRE487
chr1	35810909	35811786	CRE488
chr1	35972030	35972947	CRE489
chr1	36022762	36023547	CRE490
chr1	36042920	36043896	CRE491
chr1	36106572	36107765	CRE492
chr1	36184059	36185050	CRE493
chr1	36234651	36235595	CRE494
chr1	36270047	36270759	CRE495
chr1	36273533	36274698	CRE496
chr1	36348586	36349517	CRE497
chr1	36396104	36397277	CRE498
chr1	36500564	36501275	CRE499
chr1	36553947	36555380	CRE500
chr1	36614551	36615353	CRE501
chr1	36621095	36622135	CRE502
chr1	36626254	36627456	CRE503
chr1	36653318	36654100	CRE504
chr1	36668632	36669399	CRE505
chr1	36688967	36690493	CRE506
chr1	36772090	36773055	CRE507
chr1	36789336	36790114	CRE508
chr1	36839788	36840862	CRE509
chr1	36851587	36852325	CRE510
chr1	36862781	36863765	CRE511
chr1	36877483	36878230	CRE512
chr1	36915917	36916846	CRE513
chr1	36929319	36930671	CRE514
chr1	36947770	36948489	CRE515
chr1	37939933	37940652	CRE516
chr1	37942403	37943231	CRE517
chr1	37944734	37945441	CRE518
chr1	37952104	37952809	CRE519
chr1	37980013	37980924	CRE520
chr1	38019073	38020159	CRE521
chr1	38060743	38062071	CRE522
chr1	38141375	38142153	CRE523
chr1	38155631	38156362	CRE524
chr1	38157956	38158719	CRE525
chr1	38259274	38260427	CRE526
chr1	38273391	38274264	CRE527
chr1	38324826	38325893	CRE528
chr1	38366874	38367866	CRE529
chr1	38391069	38392033	CRE530
chr1	38396694	38397668	CRE531
chr1	38411971	38412971	CRE532
chr1	38454948	38455919	CRE533
chr1	38470261	38470982	CRE534
chr1	38474587	38475297	CRE535
chr1	38478165	38478991	CRE536
chr1	38690540	38691253	CRE537
chr1	38757417	38758210	CRE538
chr1	38993091	38993899	CRE539
chr1	39028047	39028757	CRE540
chr1	39281563	39282270	CRE541
chr1	39324944	39326212	CRE542
chr1	39338449	39339781	CRE543
chr1	39424252	39425011	CRE544
chr1	39456385	39457371	CRE545
chr1	39491490	39492498	CRE546
chr1	39499661	39500586	CRE547
chr1	39624322	39625084	CRE548
chr1	39662107	39662877	CRE549
chr1	39670967	39671672	CRE550
chr1	39680806	39681543	CRE551
chr1	39696060	39696802	CRE552
chr1	39873607	39874350	CRE553
chr1	40024648	40025569	CRE554
chr1	40041826	40042712	CRE555
chr1	40071774	40072485	CRE556
chr1	40203942	40205230	CRE557
chr1	40254356	40255437	CRE558
chr1	40264565	40265493	CRE559
chr1	40282503	40283667	CRE560
chr1	40348408	40349435	CRE561
chr1	40426102	40426934	CRE562
chr1	40505464	40506349	CRE563
chr1	40525316	40526108	CRE564
chr1	40530103	40530836	CRE565
chr1	40562259	40563348	CRE566
chr1	40626563	40627632	CRE567
chr1	40722906	40723877	CRE568
chr1	40780569	40781696	CRE569
chr1	40839360	40840886	CRE570
chr1	40851044	40852252	CRE571
chr1	40915269	40916508	CRE572
chr1	40942499	40943425	CRE573
chr1	40973995	40974927	CRE574
chr1	40996736	40997766	CRE575
chr1	41094583	41095397	CRE576
chr1	41157137	41157986	CRE577
chr1	41174381	41175562	CRE578
chr1	41267565	41268283	CRE579
chr1	41326560	41327418	CRE580
chr1	41327672	41328621	CRE581
chr1	41329039	41329813	CRE582
chr1	41444946	41446232	CRE583
chr1	41707181	41708916	CRE584
chr1	41831953	41832859	CRE585
chr1	42138079	42138885	CRE586
chr1	42139034	42139776	CRE587
chr1	42192636	42193412	CRE588
chr1	42204741	42205448	CRE589
chr1	42217057	42217841	CRE590
chr1	42219697	42220477	CRE591
chr1	42268951	42269762	CRE592
chr1	42347788	42348679	CRE593
chr1	42356723	42357647	CRE594
chr1	42500836	42502147	CRE595
chr1	42800511	42801503	CRE596
chr1	42921651	42922775	CRE597
chr1	42995006	42995835	CRE598
chr1	43123446	43124494	CRE599
chr1	43147096	43148080	CRE600
chr1	43232153	43233539	CRE601
chr1	43282258	43283114	CRE602
chr1	43312197	43313149	CRE603
chr1	43389608	43390621	CRE604
chr1	43397636	43398583	CRE605
chr1	43423474	43424319	CRE606
chr1	43500063	43501195	CRE607
chr1	43585533	43586366	CRE608
chr1	43637302	43638473	CRE609
chr1	43705099	43705887	CRE610
chr1	43761068	43761780	CRE611
chr1	43795419	43796283	CRE612
chr1	43814486	43815420	CRE613
chr1	43823763	43825099	CRE614
chr1	43832841	43834716	CRE615
chr1	43855009	43855886	CRE616
chr1	43919203	43920218	CRE617
chr1	44115177	44116422	CRE618
chr1	44172719	44173534	CRE619
chr1	44299879	44300597	CRE620
chr1	44301260	44302175	CRE621
chr1	44412113	44412893	CRE622
chr1	44440204	44441176	CRE623
chr1	44456792	44457730	CRE624
chr1	44495130	44496251	CRE625
chr1	44513455	44514302	CRE626
chr1	44678604	44679605	CRE627
chr1	44820237	44821179	CRE628
chr1	44883531	44884248	CRE629
chr1	45097121	45098071	CRE630
chr1	45139397	45140315	CRE631
chr1	45149945	45150698	CRE632
chr1	45162204	45163225	CRE633
chr1	45187271	45188271	CRE634
chr1	45196429	45197352	CRE635
chr1	45204890	45206025	CRE636
chr1	45240501	45241571	CRE637
chr1	45249390	45250405	CRE638
chr1	45264989	45266105	CRE639
chr1	45274620	45275424	CRE640
chr1	45285396	45286237	CRE641
chr1	45451498	45452681	CRE642
chr1	45516528	45517573	CRE643
chr1	45731664	45732687	CRE644
chr1	45750080	45750794	CRE645
chr1	45769284	45770483	CRE646
chr1	45805477	45806385	CRE647
chr1	45859333	45860429	CRE648
chr1	45955975	45956899	CRE649
chr1	45965037	45966515	CRE650
chr1	45986833	45988101	CRE651
chr1	46009012	46010004	CRE652
chr1	46016048	46017084	CRE653
chr1	46049314	46050391	CRE654
chr1	46151855	46152737	CRE655
chr1	46152886	46153900	CRE656
chr1	46215796	46216794	CRE657
chr1	46268703	46269896	CRE658
chr1	46394650	46395397	CRE659
chr1	46483599	46484383	CRE660
chr1	46527990	46529001	CRE661
chr1	46598305	46599138	CRE662
chr1	46632017	46633191	CRE663
chr1	46663560	46664619	CRE664
chr1	46712437	46713254	CRE665
chr1	46713568	46714299	CRE666
chr1	46751194	46752021	CRE667
chr1	46768318	46769631	CRE668
chr1	46796964	46798062	CRE669
chr1	46805928	46806836	CRE670
chr1	46907941	46908645	CRE671
chr1	47069224	47070190	CRE672
chr1	47081753	47082599	CRE673
chr1	47133394	47134263	CRE674
chr1	47184170	47185735	CRE675
chr1	47696820	47697746	CRE676
chr1	47704460	47705886	CRE677
chr1	47779290	47780634	CRE678
chr1	47799097	47800466	CRE679
chr1	47902570	47903707	CRE680
chr1	48937828	48938783	CRE681
chr1	49241942	49242720	CRE682
chr1	49722820	49723587	CRE683
chr1	50798724	50799479	CRE684
chr1	51338989	51339702	CRE685
chr1	51425186	51426472	CRE686
chr1	51433948	51434813	CRE687
chr1	51442421	51443729	CRE688
chr1	51566211	51567045	CRE689
chr1	51701498	51702718	CRE690
chr1	51733839	51734722	CRE691
chr1	51796896	51797603	CRE692
chr1	51983504	51985144	CRE693
chr1	52082226	52083156	CRE694
chr1	52194894	52195914	CRE695
chr1	52343540	52344440	CRE696
chr1	52344450	52345460	CRE697
chr1	52498616	52499895	CRE698
chr1	52521128	52522460	CRE699
chr1	52607363	52608358	CRE700
chr1	52669550	52670328	CRE701
chr1	52830870	52832231	CRE702
chr1	52869599	52870957	CRE703
chr1	52889969	52890898	CRE704
chr1	53018131	53019960	CRE705
chr1	53067671	53068673	CRE706
chr1	53079209	53079945	CRE707
chr1	53102467	53103285	CRE708
chr1	53163482	53164437	CRE709
chr1	53168552	53169727	CRE710
chr1	53191668	53192757	CRE711
chr1	53217340	53218115	CRE712
chr1	53308314	53309036	CRE713
chr1	53386667	53387707	CRE714
chr1	53392756	53393896	CRE715
chr1	53480140	53481189	CRE716
chr1	53662272	53663415	CRE717
chr1	53685964	53686808	CRE718
chr1	53703692	53704695	CRE719
chr1	53791106	53791809	CRE720
chr1	53792205	53792974	CRE721
chr1	53793641	53794348	CRE722
chr1	53833298	53834369	CRE723
chr1	54276901	54277652	CRE724
chr1	54303708	54304497	CRE725
chr1	54355079	54355938	CRE726
chr1	54410862	54412525	CRE727
chr1	54447729	54448516	CRE728
chr1	54518024	54519019	CRE729
chr1	54519106	54519808	CRE730
chr1	54665623	54666431	CRE731
chr1	54751030	54751958	CRE732
chr1	54842416	54843165	CRE733
chr1	54843833	54844544	CRE734
chr1	54872456	54873929	CRE735
chr1	54878669	54879769	CRE736
chr1	54929733	54931066	CRE737
chr1	54953932	54955034	CRE738
chr1	55007912	55008890	CRE739
chr1	55180939	55181989	CRE740
chr1	55229533	55230455	CRE741
chr1	55351931	55353118	CRE742
chr1	55487667	55488403	CRE743
chr1	55680681	55681847	CRE744
chr1	56571705	56573059	CRE745
chr1	56890478	56891194	CRE746
chr1	56982168	56982922	CRE747
chr1	58601334	58602434	CRE748
chr1	59011511	59012483	CRE749
chr1	59164925	59166002	CRE750
chr1	59249770	59250856	CRE751
chr1	59281622	59282557	CRE752
chr1	59369274	59370257	CRE753
chr1	59433883	59434933	CRE754
chr1	59485601	59486545	CRE755
chr1	59762225	59763159	CRE756
chr1	59858773	59859553	CRE757
chr1	60162855	60163611	CRE758
chr1	60279932	60281055	CRE759
chr1	61385378	61386138	CRE760
chr1	61508640	61509342	CRE761
chr1	61542457	61543574	CRE762
chr1	61869560	61870274	CRE763
chr1	62106895	62107687	CRE764
chr1	62190432	62191306	CRE765
chr1	62207660	62208915	CRE766
chr1	62390568	62391276	CRE767
chr1	62901312	62902151	CRE768
chr1	62902178	62902959	CRE769
chr1	63153163	63154441	CRE770
chr1	63249238	63250220	CRE771
chr1	63276049	63276812	CRE772
chr1	63832790	63833865	CRE773
chr1	63988406	63989631	CRE774
chr1	64028787	64029490	CRE775
chr1	64059246	64060332	CRE776
chr1	64636964	64637691	CRE777
chr1	64689098	64689869	CRE778
chr1	64882216	64882959	CRE779
chr1	65210455	65211472	CRE780
chr1	65398928	65399675	CRE781
chr1	65431556	65432678	CRE782
chr1	65533490	65534320	CRE783
chr1	65613524	65615000	CRE784
chr1	65719408	65720640	CRE785
chr1	65837839	65838563	CRE786
chr1	65885365	65886106	CRE787
chr1	65886117	65887216	CRE788
chr1	66370372	66371415	CRE789
chr1	66766798	66767530	CRE790
chr1	66904225	66905691	CRE791
chr1	66910959	66911781	CRE792
chr1	67197815	67198556	CRE793
chr1	67390065	67391350	CRE794
chr1	67395825	67396681	CRE795
chr1	67446660	67447705	CRE796
chr1	67519271	67520089	CRE797
chr1	67614189	67614910	CRE798
chr1	67896070	67896997	CRE799
chr1	68140701	68141441	CRE800
chr1	68151370	68152496	CRE801
chr1	68201612	68202611	CRE802
chr1	68962179	68963035	CRE803
chr1	69429134	69429841	CRE804
chr1	69759424	69760178	CRE805
chr1	70027333	70028121	CRE806
chr1	70670888	70671912	CRE807
chr1	70686905	70688055	CRE808
chr1	70819794	70820976	CRE809
chr1	70875899	70877055	CRE810
chr1	71546140	71547212	CRE811
chr1	71740932	71741675	CRE812
chr1	72197548	72198259	CRE813
chr1	72347407	72348181	CRE814
chr1	74663458	74664407	CRE815
chr1	74966035	74966744	CRE816
chr1	75198592	75199682	CRE817
chr1	75840998	75841972	CRE818
chr1	76189762	76190763	CRE819
chr1	76251303	76252257	CRE820
chr1	76539773	76540915	CRE821
chr1	76619754	76620751	CRE822
chr1	76890815	76891664	CRE823
chr1	77684701	77685600	CRE824
chr1	77879401	77880110	CRE825
chr1	77948383	77949148	CRE826
chr1	78148328	78149602	CRE827
chr1	78224444	78225989	CRE828
chr1	78244796	78245875	CRE829
chr1	78277045	78277843	CRE830
chr1	78391994	78392741	CRE831
chr1	78444035	78445206	CRE832
chr1	78469713	78470960	CRE833
chr1	78608406	78609604	CRE834
chr1	80176067	80176821	CRE835
chr1	82691202	82691919	CRE836
chr1	83599933	83600710	CRE837
chr1	83974218	83974932	CRE838
chr1	84326058	84326971	CRE839
chr1	84464588	84465370	CRE840
chr1	84542884	84544280	CRE841
chr1	84556240	84557105	CRE842
chr1	84609675	84610593	CRE843
chr1	84736925	84737996	CRE844
chr1	84764378	84765154	CRE845
chr1	84766777	84767480	CRE846
chr1	84854602	84855322	CRE847
chr1	84944426	84945500	CRE848
chr1	84971300	84972348	CRE849
chr1	85039161	85040173	CRE850
chr1	85085883	85087015	CRE851
chr1	85155476	85156224	CRE852
chr1	85156333	85157039	CRE853
chr1	85328287	85329452	CRE854
chr1	85410547	85411654	CRE855
chr1	85638017	85638746	CRE856
chr1	85666723	85667875	CRE857
chr1	85724863	85725780	CRE858
chr1	85741323	85742464	CRE859
chr1	86046280	86047058	CRE860
chr1	86173615	86174681	CRE861
chr1	86854754	86855669	CRE862
chr1	86861395	86862508	CRE863
chr1	87169957	87171113	CRE864
chr1	87379102	87380287	CRE865
chr1	87523317	87524484	CRE866
chr1	87793499	87794205	CRE867
chr1	87794463	87795543	CRE868
chr1	87800740	87801464	CRE869
chr1	88228579	88229352	CRE870
chr1	89148979	89149894	CRE871
chr1	89149955	89150691	CRE872
chr1	89356762	89357818	CRE873
chr1	89457671	89459336	CRE874
chr1	89488049	89489018	CRE875
chr1	89530116	89531292	CRE876
chr1	89591202	89592029	CRE877
chr1	89594475	89595287	CRE878
chr1	89664195	89664919	CRE879
chr1	89752791	89753533	CRE880
chr1	89873073	89873783	CRE881
chr1	89989847	89990970	CRE882
chr1	90098453	90099250	CRE883
chr1	90146719	90147551	CRE884
chr1	90223243	90223945	CRE885
chr1	90228513	90229224	CRE886
chr1	90251808	90252921	CRE887
chr1	90286481	90287619	CRE888
chr1	90308594	90309751	CRE889
chr1	90408212	90408940	CRE890
chr1	90460432	90461503	CRE891
chr1	90528222	90528954	CRE892
chr1	91316586	91317412	CRE893
chr1	91487043	91487909	CRE894
chr1	91852468	91853389	CRE895
chr1	91869926	91870650	CRE896
chr1	91966174	91967198	CRE897
chr1	92178278	92179360	CRE898
chr1	92269671	92270441	CRE899
chr1	92427397	92428147	CRE900
chr1	92545663	92546611	CRE901
chr1	92764188	92765096	CRE902
chr1	92875759	92876593	CRE903
chr1	92925213	92926757	CRE904
chr1	92941132	92941868	CRE905
chr1	92950202	92952446	CRE906
chr1	92970067	92970871	CRE907
chr1	93049411	93050457	CRE908
chr1	93250085	93250972	CRE909
chr1	93297578	93298414	CRE910
chr1	93416655	93417460	CRE911
chr1	93427208	93428047	CRE912
chr1	93495146	93496096	CRE913
chr1	93498857	93499688	CRE914
chr1	93507729	93508737	CRE915
chr1	93544392	93545274	CRE916
chr1	93645251	93646879	CRE917
chr1	93684712	93685678	CRE918
chr1	93782359	93783164	CRE919
chr1	93810960	93812240	CRE920
chr1	94032407	94033226	CRE921
chr1	94073571	94074514	CRE922
chr1	94312038	94313684	CRE923
chr1	94344223	94345267	CRE924
chr1	94374335	94375672	CRE925
chr1	94557018	94558675	CRE926
chr1	94883272	94884297	CRE927
chr1	95186270	95187204	CRE928
chr1	95319899	95320604	CRE929
chr1	95348919	95349648	CRE930
chr1	95428074	95428900	CRE931
chr1	95537788	95539051	CRE932
chr1	95699245	95700197	CRE933
chr1	97187070	97188234	CRE934
chr1	98069040	98069822	CRE935
chr1	98315134	98315851	CRE936
chr1	98330113	98331047	CRE937
chr1	98385812	98387261	CRE938
chr1	98789419	98790181	CRE939
chr1	98854007	98854754	CRE940
chr1	98869437	98870230	CRE941
chr1	99336377	99337923	CRE942
chr1	100231657	100232446	CRE943
chr1	100273880	100274607	CRE944
chr1	100315081	100316170	CRE945
chr1	100408467	100409397	CRE946
chr1	100435096	100436117	CRE947
chr1	100503143	100504543	CRE948
chr1	100598106	100599056	CRE949
chr1	100714719	100715679	CRE950
chr1	100731373	100732368	CRE951
chr1	100788023	100788774	CRE952
chr1	100816725	100817450	CRE953
chr1	100864974	100865691	CRE954
chr1	100865960	100866766	CRE955
chr1	101359971	101360999	CRE956
chr1	101361482	101362406	CRE957
chr1	101491153	101492000	CRE958
chr1	101577102	101577863	CRE959
chr1	101593527	101594303	CRE960
chr1	101727910	101728749	CRE961
chr1	101776544	101777288	CRE962
chr1	101822457	101823256	CRE963
chr1	101854014	101854721	CRE964
chr1	104059924	104060709	CRE965
chr1	104068047	104069196	CRE966
chr1	105135377	105136186	CRE967
chr1	106012511	106013218	CRE968
chr1	106249943	106250689	CRE969
chr1	107598942	107599809	CRE970
chr1	107993885	107994629	CRE971
chr1	108371093	108372080	CRE972
chr1	108384624	108385436	CRE973
chr1	108387440	108388266	CRE974
chr1	108407554	108408502	CRE975
chr1	108439894	108440626	CRE976
chr1	108462534	108463379	CRE977
chr1	108506670	108507567	CRE978
chr1	108593974	108594696	CRE979
chr1	108622338	108623149	CRE980
chr1	108742496	108743491	CRE981
chr1	109093560	109094285	CRE982
chr1	109102503	109103218	CRE983
chr1	109203439	109204613	CRE984
chr1	109234553	109235651	CRE985
chr1	109289087	109290281	CRE986
chr1	109394937	109395641	CRE987
chr1	109419046	109420169	CRE988
chr1	109455421	109456547	CRE989
chr1	109505282	109506368	CRE990
chr1	109583438	109584685	CRE991
chr1	109618229	109619143	CRE992
chr1	109632857	109633697	CRE993
chr1	109642565	109643553	CRE994
chr1	109756465	109757489	CRE995
chr1	109825790	109826616	CRE996
chr1	109940072	109940776	CRE997
chr1	109941232	109942034	CRE998
chr1	109968422	109969306	CRE999
chr1	110026520	110027371	CRE1000
chr1	110036423	110037273	CRE1001
chr1	110074855	110075763	CRE1002
chr1	110090565	110091659	CRE1003
chr1	110162551	110163704	CRE1004
chr1	110198092	110199191	CRE1005
chr1	110229902	110230879	CRE1006
chr1	110254112	110254929	CRE1007
chr1	110282316	110283199	CRE1008
chr1	110305744	110306567	CRE1009
chr1	110527285	110528269	CRE1010
chr1	110576649	110577625	CRE1011
chr1	110644698	110645542	CRE1012
chr1	110745658	110746488	CRE1013
chr1	110752284	110753153	CRE1014
chr1	110880622	110881831	CRE1015
chr1	110949892	110950905	CRE1016
chr1	111000263	111000968	CRE1017
chr1	111161927	111162969	CRE1018
chr1	111214805	111215963	CRE1019
chr1	111269723	111270436	CRE1020
chr1	111329075	111329819	CRE1021
chr1	111415308	111416291	CRE1022
chr1	111417513	111418628	CRE1023
chr1	111459321	111460222	CRE1024
chr1	111505766	111506787	CRE1025
chr1	111621675	111622430	CRE1026
chr1	111644587	111645371	CRE1027
chr1	111670263	111671513	CRE1028
chr1	111682027	111683357	CRE1029
chr1	111746523	111747298	CRE1030
chr1	111757624	111758682	CRE1031
chr1	111761916	111762986	CRE1032
chr1	111888729	111889573	CRE1033
chr1	111991233	111992707	CRE1034
chr1	112013803	112014515	CRE1035
chr1	112050279	112051202	CRE1036
chr1	112057862	112059067	CRE1037
chr1	112162467	112163607	CRE1038
chr1	112276053	112276832	CRE1039
chr1	112297735	112298892	CRE1040
chr1	112918718	112919504	CRE1041
chr1	112938200	112938952	CRE1042
chr1	113008737	113009863	CRE1043
chr1	113161400	113162235	CRE1044
chr1	113217001	113217999	CRE1045
chr1	113247710	113248464	CRE1046
chr1	113361754	113362586	CRE1047
chr1	113392706	113393581	CRE1048
chr1	113498345	113499788	CRE1049
chr1	113585332	113586106	CRE1050
chr1	113615339	113616477	CRE1051
chr1	113932358	113933370	CRE1052
chr1	114235680	114236460	CRE1053
chr1	114301567	114302574	CRE1054
chr1	114354188	114355807	CRE1055
chr1	114413693	114415456	CRE1056
chr1	114446825	114447980	CRE1057
chr1	114471464	114472648	CRE1058
chr1	114656508	114657220	CRE1059
chr1	115053701	115054788	CRE1060
chr1	115123755	115124870	CRE1061
chr1	115212183	115213194	CRE1062
chr1	115258748	115259766	CRE1063
chr1	115300193	115301029	CRE1064
chr1	115322822	115323830	CRE1065
chr1	115605173	115606210	CRE1066
chr1	115631616	115632322	CRE1067
chr1	115641648	115642630	CRE1068
chr1	115879543	115880256	CRE1069
chr1	116089601	116090325	CRE1070
chr1	116184600	116185348	CRE1071
chr1	116212964	116213673	CRE1072
chr1	116518499	116519847	CRE1073
chr1	116548585	116549679	CRE1074
chr1	116681129	116682080	CRE1075
chr1	116694614	116695352	CRE1076
chr1	116710662	116711593	CRE1077
chr1	116915753	116917301	CRE1078
chr1	116960766	116961763	CRE1079
chr1	117047104	117048044	CRE1080
chr1	117113146	117114035	CRE1081
chr1	117128779	117129541	CRE1082
chr1	117311340	117312474	CRE1083
chr1	117358675	117359847	CRE1084
chr1	117529116	117530167	CRE1085
chr1	117593797	117594914	CRE1086
chr1	117601711	117602604	CRE1087
chr1	117664016	117665074	CRE1088
chr1	117909003	117909970	CRE1089
chr1	118277431	118278548	CRE1090
chr1	118321012	118321796	CRE1091
chr1	118471697	118473155	CRE1092
chr1	118727395	118728429	CRE1093
chr1	118744346	118745074	CRE1094
chr1	119319022	119320220	CRE1095
chr1	119682529	119683799	CRE1096
chr1	120190251	120191001	CRE1097
chr1	120254396	120255582	CRE1098
chr1	120401756	120402508	CRE1099
chr1	120543603	120544304	CRE1100
chr1	120557533	120558708	CRE1101
chr1	120567138	120567850	CRE1102
chr1	120593810	120594520	CRE1103
chr1	120611372	120612519	CRE1104
chr1	120838837	120840036	CRE1105
chr1	120925419	120926559	CRE1106
chr1	121137936	121138653	CRE1107
chr1	121199932	121200808	CRE1108
chr1	121260308	121261418	CRE1109
chr1	121282121	121282897	CRE1110
chr1	121328624	121329325	CRE1111
chr1	121353963	121354667	CRE1112
chr1	121355385	121356093	CRE1113
chr1	121385955	121386657	CRE1114
chr1	121478312	121479043	CRE1115
chr1	121484548	121485424	CRE1116
chr1	142890497	142891213	CRE1117
chr1	142949418	142950136	CRE1118
chr1	143278438	143279139	CRE1119
chr1	143283400	143284138	CRE1120
chr1	143467135	143467849	CRE1121
chr1	143646954	143647658	CRE1122
chr1	143670357	143671066	CRE1123
chr1	143673012	143673795	CRE1124
chr1	143686843	143687663	CRE1125
chr1	143743138	143744497	CRE1126
chr1	143765784	143766659	CRE1127
chr1	143913474	143914176	CRE1128
chr1	144311113	144312223	CRE1129
chr1	144338805	144339767	CRE1130
chr1	144491314	144492274	CRE1131
chr1	144519825	144521526	CRE1132
chr1	144533490	144534458	CRE1133
chr1	144567488	144568326	CRE1134
chr1	144593311	144594445	CRE1135
chr1	145096215	145097124	CRE1136
chr1	145139085	145139983	CRE1137
chr1	145209066	145210058	CRE1138
chr1	145262712	145263868	CRE1139
chr1	145276980	145277711	CRE1140
chr1	145382156	145383192	CRE1141
chr1	145395650	145396476	CRE1142
chr1	145396874	145397814	CRE1143
chr1	145427532	145428398	CRE1144
chr1	145437828	145438955	CRE1145
chr1	145469866	145470616	CRE1146
chr1	145477009	145477876	CRE1147
chr1	145507015	145508117	CRE1148
chr1	145515829	145516942	CRE1149
chr1	145562540	145563312	CRE1150
chr1	145575255	145576365	CRE1151
chr1	145588802	145589857	CRE1152
chr1	145610427	145611360	CRE1153
chr1	145666505	145667351	CRE1154
chr1	145826348	145827278	CRE1155
chr1	145969154	145969909	CRE1156
chr1	146081986	146082776	CRE1157
chr1	146373439	146374282	CRE1158
chr1	146555747	146556618	CRE1159
chr1	146643518	146644709	CRE1160
chr1	146696609	146697700	CRE1161
chr1	146713889	146715155	CRE1162
chr1	147012303	147013293	CRE1163
chr1	147071057	147072377	CRE1164
chr1	147106748	147107519	CRE1165
chr1	147141824	147143056	CRE1166
chr1	147400302	147401292	CRE1167
chr1	147442411	147443114	CRE1168
chr1	147510899	147511657	CRE1169
chr1	147624020	147624948	CRE1170
chr1	147628289	147628991	CRE1171
chr1	147735469	147736468	CRE1172
chr1	147790246	147791254	CRE1173
chr1	147806443	147807429	CRE1174
chr1	147834443	147835149	CRE1175
chr1	147860537	147861279	CRE1176
chr1	147874366	147875171	CRE1177
chr1	147931160	147931976	CRE1178
chr1	147953304	147954034	CRE1179
chr1	147993374	147994326	CRE1180
chr1	148000116	148001073	CRE1181
chr1	148176041	148176946	CRE1182
chr1	148192971	148193682	CRE1183
chr1	148240691	148242151	CRE1184
chr1	148247384	148248457	CRE1185
chr1	148555772	148556964	CRE1186
chr1	148604761	148605863	CRE1187
chr1	148767074	148767879	CRE1188
chr1	149035033	149036069	CRE1189
chr1	149194231	149195015	CRE1190
chr1	149214737	149216269	CRE1191
chr1	149223294	149224957	CRE1192
chr1	149294036	149294740	CRE1193
chr1	149297995	149298721	CRE1194
chr1	149379125	149379867	CRE1195
chr1	149398507	149399216	CRE1196
chr1	149514073	149515026	CRE1197
chr1	149576449	149577861	CRE1198
chr1	149605325	149606328	CRE1199
chr1	149683457	149684243	CRE1200
chr1	149740201	149741085	CRE1201
chr1	149763837	149764836	CRE1202
chr1	149783506	149785004	CRE1203
chr1	149803424	149804330	CRE1204
chr1	149812728	149813616	CRE1205
chr1	149814580	149815395	CRE1206
chr1	149821438	149822425	CRE1207
chr1	149823412	149824142	CRE1208
chr1	149832639	149833666	CRE1209
chr1	149858982	149859745	CRE1210
chr1	149870836	149871990	CRE1211
chr1	149887364	149888134	CRE1212
chr1	149888852	149889611	CRE1213
chr1	149899195	149900587	CRE1214
chr1	149981963	149982782	CRE1215
chr1	150039326	150040144	CRE1216
chr1	150122469	150123561	CRE1217
chr1	150158940	150159684	CRE1218
chr1	150185629	150186503	CRE1219
chr1	150207416	150208416	CRE1220
chr1	150208526	150209285	CRE1221
chr1	150227861	150228753	CRE1222
chr1	150240607	150241627	CRE1223
chr1	150253630	150254343	CRE1224
chr1	150265803	150266742	CRE1225
chr1	150293450	150294545	CRE1226
chr1	150335910	150337582	CRE1227
chr1	150459405	150460348	CRE1228
chr1	150487598	150488613	CRE1229
chr1	150534033	150534868	CRE1230
chr1	150551199	150552114	CRE1231
chr1	150601375	150602548	CRE1232
chr1	150669141	150670642	CRE1233
chr1	150737564	150738576	CRE1234
chr1	150848387	150849350	CRE1235
chr1	150898554	150899398	CRE1236
chr1	150946247	150947415	CRE1237
chr1	150949811	150950541	CRE1238
chr1	150980752	150981561	CRE1239
chr1	151019657	151020768	CRE1240
chr1	151031543	151032334	CRE1241
chr1	151042690	151043802	CRE1242
chr1	151118617	151119720	CRE1243
chr1	151129069	151129916	CRE1244
chr1	151137838	151139325	CRE1245
chr1	151161772	151162938	CRE1246
chr1	151170578	151171820	CRE1247
chr1	151226723	151227887	CRE1248
chr1	151253718	151254638	CRE1249
chr1	151299378	151300446	CRE1250
chr1	151318849	151320002	CRE1251
chr1	151371664	151372682	CRE1252
chr1	151431230	151432165	CRE1253
chr1	151445509	151446426	CRE1254
chr1	151483176	151484344	CRE1255
chr1	151512309	151513290	CRE1256
chr1	151568558	151569591	CRE1257
chr1	151584212	151585061	CRE1258
chr1	151647960	151649111	CRE1259
chr1	151693195	151693972	CRE1260
chr1	151735514	151736724	CRE1261
chr1	151747127	151747921	CRE1262
chr1	151762417	151764092	CRE1263
chr1	151881550	151882677	CRE1264
chr1	152007101	152007893	CRE1265
chr1	152020106	152021211	CRE1266
chr1	152043186	152043941	CRE1267
chr1	152432052	152433139	CRE1268
chr1	153031824	153032535	CRE1269
chr1	153045802	153046504	CRE1270
chr1	153316335	153317455	CRE1271
chr1	153537935	153538827	CRE1272
chr1	153570788	153571723	CRE1273
chr1	153606278	153607119	CRE1274
chr1	153625119	153626141	CRE1275
chr1	153630887	153631886	CRE1276
chr1	153642668	153643687	CRE1277
chr1	153670161	153671055	CRE1278
chr1	153700302	153701280	CRE1279
chr1	153747733	153748643	CRE1280
chr1	153755462	153756511	CRE1281
chr1	153762653	153763831	CRE1282
chr1	153894884	153896558	CRE1283
chr1	153917254	153918680	CRE1284
chr1	153929821	153931257	CRE1285
chr1	153935287	153936260	CRE1286
chr1	153939040	153940237	CRE1287
chr1	153949447	153951029	CRE1288
chr1	153962936	153963815	CRE1289
chr1	154129704	154130424	CRE1290
chr1	154155014	154155739	CRE1291
chr1	154192429	154193319	CRE1292
chr1	154244610	154245594	CRE1293
chr1	154263632	154264335	CRE1294
chr1	154297786	154298490	CRE1295
chr1	154300007	154300736	CRE1296
chr1	154377839	154378556	CRE1297
chr1	154435723	154436824	CRE1298
chr1	154530561	154532039	CRE1299
chr1	154579888	154580888	CRE1300
chr1	154599761	154600832	CRE1301
chr1	154908918	154909969	CRE1302
chr1	154914477	154915215	CRE1303
chr1	154928051	154928836	CRE1304
chr1	154934177	154934984	CRE1305
chr1	154946115	154947130	CRE1306
chr1	154955544	154956370	CRE1307
chr1	154972592	154973298	CRE1308
chr1	155022966	155023845	CRE1309
chr1	155035839	155036836	CRE1310
chr1	155057350	155058344	CRE1311
chr1	155107803	155108690	CRE1312
chr1	155112239	155113252	CRE1313
chr1	155145124	155146031	CRE1314
chr1	155162953	155164046	CRE1315
chr1	155178514	155179422	CRE1316
chr1	155196405	155198119	CRE1317
chr1	155213932	155215028	CRE1318
chr1	155220034	155220873	CRE1319
chr1	155224647	155225841	CRE1320
chr1	155231653	155232540	CRE1321
chr1	155242688	155243772	CRE1322
chr1	155277917	155279189	CRE1323
chr1	155293248	155294084	CRE1324
chr1	155532469	155533260	CRE1325
chr1	155579129	155580540	CRE1326
chr1	155606806	155607814	CRE1327
chr1	155657672	155658918	CRE1328
chr1	155714771	155715975	CRE1329
chr1	155826439	155827262	CRE1330
chr1	155880445	155881685	CRE1331
chr1	155903782	155904826	CRE1332
chr1	155946508	155947249	CRE1333
chr1	155959315	155960032	CRE1334
chr1	155990137	155991188	CRE1335
chr1	156023635	156025024	CRE1336
chr1	156051609	156052596	CRE1337
chr1	156066343	156067179	CRE1338
chr1	156075737	156076489	CRE1339
chr1	156096287	156097228	CRE1340
chr1	156117747	156118492	CRE1341
chr1	156162960	156164321	CRE1342
chr1	156182528	156183299	CRE1343
chr1	156186041	156186868	CRE1344
chr1	156251933	156253106	CRE1345
chr1	156264767	156265737	CRE1346
chr1	156307455	156308714	CRE1347
chr1	156426329	156427290	CRE1348
chr1	156470610	156471322	CRE1349
chr1	156474091	156474990	CRE1350
chr1	156494254	156494986	CRE1351
chr1	156541860	156542562	CRE1352
chr1	156551165	156552679	CRE1353
chr1	156560916	156561986	CRE1354
chr1	156570826	156571729	CRE1355
chr1	156697737	156699101	CRE1356
chr1	156710146	156710897	CRE1357
chr1	156720320	156721489	CRE1358
chr1	156721558	156722440	CRE1359
chr1	156736233	156737192	CRE1360
chr1	156737256	156738196	CRE1361
chr1	156786230	156787085	CRE1362
chr1	156868157	156868870	CRE1363
chr1	157014845	157016489	CRE1364
chr1	157107437	157108795	CRE1365
chr1	157117751	157118460	CRE1366
chr1	157373361	157374064	CRE1367
chr1	157399651	157400353	CRE1368
chr1	157521764	157522507	CRE1369
chr1	157598654	157599517	CRE1370
chr1	157622400	157623229	CRE1371
chr1	157629396	157630311	CRE1372
chr1	157776232	157776942	CRE1373
chr1	157818882	157819983	CRE1374
chr1	157963266	157964184	CRE1375
chr1	158082926	158083646	CRE1376
chr1	158119222	158120081	CRE1377
chr1	158150145	158151089	CRE1378
chr1	158173870	158174666	CRE1379
chr1	158226313	158227018	CRE1380
chr1	158259919	158260628	CRE1381
chr1	158300229	158301134	CRE1382
chr1	158303825	158304527	CRE1383
chr1	158323110	158323830	CRE1384
chr1	158368229	158369369	CRE1385
chr1	158803074	158803902	CRE1386
chr1	158921748	158922498	CRE1387
chr1	158978600	158980391	CRE1388
chr1	159037135	159038119	CRE1389
chr1	159045912	159046883	CRE1390
chr1	159046993	159047727	CRE1391
chr1	159062005	159062708	CRE1392
chr1	159615980	159616778	CRE1393
chr1	159633520	159634237	CRE1394
chr1	159750498	159751393	CRE1395
chr1	159823985	159825156	CRE1396
chr1	159859336	159860077	CRE1397
chr1	159894375	159895416	CRE1398
chr1	160001252	160002378	CRE1399
chr1	160041581	160042307	CRE1400
chr1	160067631	160068517	CRE1401
chr1	160068713	160069542	CRE1402
chr1	160082120	160082822	CRE1403
chr1	160174619	160175621	CRE1404
chr1	160231841	160232859	CRE1405
chr1	160254119	160255181	CRE1406
chr1	160287914	160288623	CRE1407
chr1	160312623	160313746	CRE1408
chr1	160407634	160408577	CRE1409
chr1	160416833	160417543	CRE1410
chr1	160492534	160493300	CRE1411
chr1	160509407	160510120	CRE1412
chr1	160537419	160538275	CRE1413
chr1	160548587	160549573	CRE1414
chr1	160598538	160599921	CRE1415
chr1	160644635	160645480	CRE1416
chr1	160681271	160682133	CRE1417
chr1	160696126	160696956	CRE1418
chr1	160737620	160738482	CRE1419
chr1	160751720	160752753	CRE1420
chr1	160759557	160760560	CRE1421
chr1	160807287	160808142	CRE1422
chr1	160832071	160832782	CRE1423
chr1	160959732	160960487	CRE1424
chr1	160981564	160982268	CRE1425
chr1	160982910	160983873	CRE1426
chr1	161008189	161009098	CRE1427
chr1	161015034	161016713	CRE1428
chr1	161039052	161039858	CRE1429
chr1	161087411	161088227	CRE1430
chr1	161102220	161103132	CRE1431
chr1	161123248	161124303	CRE1432
chr1	161129072	161129967	CRE1433
chr1	161135552	161136303	CRE1434
chr1	161146801	161147640	CRE1435
chr1	161155194	161155983	CRE1436
chr1	161171653	161172676	CRE1437
chr1	161186241	161187003	CRE1438
chr1	161275183	161276151	CRE1439
chr1	161283726	161284643	CRE1440
chr1	161329196	161330035	CRE1441
chr1	161359308	161360473	CRE1442
chr1	161368762	161370038	CRE1443
chr1	161379733	161380434	CRE1444
chr1	161397782	161398505	CRE1445
chr1	161410015	161410797	CRE1446
chr1	161424300	161425016	CRE1447
chr1	161439067	161439816	CRE1448
chr1	161456925	161457655	CRE1449
chr1	161493586	161494593	CRE1450
chr1	161500307	161501476	CRE1451
chr1	161509448	161510577	CRE1452
chr1	161581629	161582982	CRE1453
chr1	161676770	161677545	CRE1454
chr1	161696020	161696739	CRE1455
chr1	161719163	161720095	CRE1456
chr1	161735670	161736518	CRE1457
chr1	161931716	161932475	CRE1458
chr1	161958994	161959932	CRE1459
chr1	162038884	162039586	CRE1460
chr1	162467147	162468265	CRE1461
chr1	162530750	162531983	CRE1462
chr1	162705956	162707076	CRE1463
chr1	162759919	162761271	CRE1464
chr1	163291122	163292333	CRE1465
chr1	163891879	163892585	CRE1466
chr1	164527556	164528269	CRE1467
chr1	164681631	164682422	CRE1468
chr1	165567056	165568202	CRE1469
chr1	165599667	165600756	CRE1470
chr1	165667208	165668243	CRE1471
chr1	165737997	165738982	CRE1472
chr1	165796762	165797475	CRE1473
chr1	165797704	165798512	CRE1474
chr1	165819904	165821382	CRE1475
chr1	165831248	165832003	CRE1476
chr1	165839847	165840731	CRE1477
chr1	165950647	165951434	CRE1478
chr1	166135782	166136493	CRE1479
chr1	166262588	166263417	CRE1480
chr1	166458889	166459857	CRE1481
chr1	166807956	166809153	CRE1482
chr1	166844793	166845827	CRE1483
chr1	166944368	166945282	CRE1484
chr1	167012772	167013634	CRE1485
chr1	167028032	167028806	CRE1486
chr1	167035805	167036549	CRE1487
chr1	167059276	167060261	CRE1488
chr1	167077848	167079744	CRE1489
chr1	167189234	167189970	CRE1490
chr1	167190582	167191769	CRE1491
chr1	167266580	167267442	CRE1492
chr1	167298068	167298888	CRE1493
chr1	167312425	167313175	CRE1494
chr1	167424230	167425408	CRE1495
chr1	167442606	167443718	CRE1496
chr1	167486896	167488006	CRE1497
chr1	167517805	167518747	CRE1498
chr1	167522230	167523287	CRE1499
chr1	167586442	167587267	CRE1500
chr1	167590605	167591560	CRE1501
chr1	167598299	167599006	CRE1502
chr1	167599300	167600021	CRE1503
chr1	167683445	167684180	CRE1504
chr1	167690655	167691887	CRE1505
chr1	167721861	167722622	CRE1506
chr1	167773974	167774947	CRE1507
chr1	167789101	167789813	CRE1508
chr1	167905271	167906050	CRE1509
chr1	168025269	168025994	CRE1510
chr1	168130321	168131026	CRE1511
chr1	168139555	168140429	CRE1512
chr1	168147743	168148887	CRE1513
chr1	168194718	168195845	CRE1514
chr1	168317159	168318288	CRE1515
chr1	168503883	168504795	CRE1516
chr1	168504819	168505530	CRE1517
chr1	169075300	169076010	CRE1518
chr1	169336762	169337890	CRE1519
chr1	169454624	169455726	CRE1520
chr1	169477362	169478109	CRE1521
chr1	169663593	169664370	CRE1522
chr1	169763533	169764656	CRE1523
chr1	169862415	169863445	CRE1524
chr1	169877839	169878739	CRE1525
chr1	170037508	170038588	CRE1526
chr1	170043057	170044061	CRE1527
chr1	170500634	170501795	CRE1528
chr1	170550023	170550768	CRE1529
chr1	171013714	171014483	CRE1530
chr1	171283108	171284125	CRE1531
chr1	171294479	171295265	CRE1532
chr1	171319427	171320528	CRE1533
chr1	171342493	171343248	CRE1534
chr1	171403893	171404731	CRE1535
chr1	171453831	171455130	CRE1536
chr1	171614081	171614838	CRE1537
chr1	171710761	171711923	CRE1538
chr1	171749802	171750515	CRE1539
chr1	171750550	171751412	CRE1540
chr1	171809993	171810739	CRE1541
chr1	172349554	172350510	CRE1542
chr1	172359829	172361010	CRE1543
chr1	172362952	172363954	CRE1544
chr1	172396024	172397110	CRE1545
chr1	172412339	172413495	CRE1546
chr1	172442551	172443325	CRE1547
chr1	172501373	172502756	CRE1548
chr1	172788028	172789113	CRE1549
chr1	172797083	172797804	CRE1550
chr1	172863625	172864746	CRE1551
chr1	172875741	172876558	CRE1552
chr1	172903130	172903840	CRE1553
chr1	173174270	173174977	CRE1554
chr1	173375558	173376277	CRE1555
chr1	173384708	173385616	CRE1556
chr1	173445818	173447122	CRE1557
chr1	173683860	173684985	CRE1558
chr1	173793034	173794556	CRE1559
chr1	173837225	173838008	CRE1560
chr1	173990812	173992080	CRE1561
chr1	174112830	174113630	CRE1562
chr1	174127955	174129106	CRE1563
chr1	174768802	174769808	CRE1564
chr1	174818037	174818822	CRE1565
chr1	174959249	174960287	CRE1566
chr1	174967896	174969038	CRE1567
chr1	174992171	174993140	CRE1568
chr1	174998510	174999258	CRE1569
chr1	175111093	175111880	CRE1570
chr1	175177721	175178487	CRE1571
chr1	176175876	176176732	CRE1572
chr1	177827184	177827957	CRE1573
chr1	178006547	178007671	CRE1574
chr1	178014929	178015690	CRE1575
chr1	178024933	178025671	CRE1576
chr1	178036264	178037074	CRE1577
chr1	178252965	178253905	CRE1578
chr1	178380676	178381793	CRE1579
chr1	178511312	178512579	CRE1580
chr1	178574929	178575749	CRE1581
chr1	178694590	178695649	CRE1582
chr1	178971788	178972497	CRE1583
chr1	178994962	178996207	CRE1584
chr1	179008933	179009706	CRE1585
chr1	179029257	179030122	CRE1586
chr1	179050777	179051607	CRE1587
chr1	179098361	179099575	CRE1588
chr1	179103341	179104090	CRE1589
chr1	179197997	179199311	CRE1590
chr1	179262664	179263799	CRE1591
chr1	179334231	179335393	CRE1592
chr1	179783689	179784663	CRE1593
chr1	179851118	179852435	CRE1594
chr1	179922860	179924435	CRE1595
chr1	180123246	180124465	CRE1596
chr1	180247339	180248371	CRE1597
chr1	180471302	180472479	CRE1598
chr1	180484999	180485771	CRE1599
chr1	180600961	180602113	CRE1600
chr1	180915247	180915988	CRE1601
chr1	180951039	180951756	CRE1602
chr1	180991141	180992285	CRE1603
chr1	181002238	181003497	CRE1604
chr1	181031380	181032297	CRE1605
chr1	181058803	181059876	CRE1606
chr1	181073738	181074688	CRE1607
chr1	181097460	181098590	CRE1608
chr1	181103742	181104597	CRE1609
chr1	181998122	181999498	CRE1610
chr1	182112923	182113723	CRE1611
chr1	182204924	182205629	CRE1612
chr1	182228743	182229620	CRE1613
chr1	182237568	182238270	CRE1614
chr1	182269219	182269941	CRE1615
chr1	182360389	182361738	CRE1616
chr1	182414801	182415539	CRE1617
chr1	182557727	182558651	CRE1618
chr1	182584175	182585104	CRE1619
chr1	182758460	182759345	CRE1620
chr1	182808062	182809235	CRE1621
chr1	182931667	182932472	CRE1622
chr1	182991635	182992990	CRE1623
chr1	183040024	183040807	CRE1624
chr1	183125287	183126001	CRE1625
chr1	183248185	183249254	CRE1626
chr1	183441122	183441978	CRE1627
chr1	183548832	183549609	CRE1628
chr1	183559000	183559717	CRE1629
chr1	183573198	183573955	CRE1630
chr1	183604025	183605080	CRE1631
chr1	184020333	184021291	CRE1632
chr1	184355943	184356644	CRE1633
chr1	184715454	184716222	CRE1634
chr1	184723004	184724033	CRE1635
chr1	184761310	184762074	CRE1636
chr1	184942326	184943625	CRE1637
chr1	185014603	185015444	CRE1638
chr1	185125552	185126621	CRE1639
chr1	185139223	185139964	CRE1640
chr1	185226440	185227472	CRE1641
chr1	185285737	185287248	CRE1642
chr1	185390024	185390894	CRE1643
chr1	185662881	185663764	CRE1644
chr1	185827315	185828021	CRE1645
chr1	185861975	185862688	CRE1646
chr1	186344102	186345209	CRE1647
chr1	186481092	186482108	CRE1648
chr1	186649438	186650393	CRE1649
chr1	186796357	186797070	CRE1650
chr1	186797837	186798741	CRE1651
chr1	187041445	187042637	CRE1652
chr1	187334640	187335353	CRE1653
chr1	188726744	188727497	CRE1654
chr1	189960928	189961703	CRE1655
chr1	192077423	192078175	CRE1656
chr1	192127861	192128579	CRE1657
chr1	192139020	192139744	CRE1658
chr1	192507633	192509245	CRE1659
chr1	192544704	192545454	CRE1660
chr1	192578486	192579230	CRE1661
chr1	192777694	192778546	CRE1662
chr1	193028506	193029268	CRE1663
chr1	193073799	193074909	CRE1664
chr1	193091013	193091896	CRE1665
chr1	193417862	193418831	CRE1666
chr1	193831183	193831959	CRE1667
chr1	194194983	194196050	CRE1668
chr1	194667736	194668468	CRE1669
chr1	195164728	195165484	CRE1670
chr1	197115169	197116227	CRE1671
chr1	197169697	197171218	CRE1672
chr1	197237131	197237851	CRE1673
chr1	197256366	197257509	CRE1674
chr1	197323617	197324318	CRE1675
chr1	197411039	197411743	CRE1676
chr1	197730409	197731949	CRE1677
chr1	197743454	197744303	CRE1678
chr1	197744664	197745755	CRE1679
chr1	197871096	197872283	CRE1680
chr1	197944369	197945125	CRE1681
chr1	198071706	198072461	CRE1682
chr1	198126685	198127408	CRE1683
chr1	198156512	198157238	CRE1684
chr1	198488951	198489660	CRE1685
chr1	198492715	198493737	CRE1686
chr1	198567339	198568149	CRE1687
chr1	198581666	198582863	CRE1688
chr1	198583850	198584562	CRE1689
chr1	198590372	198591668	CRE1690
chr1	198608021	198608727	CRE1691
chr1	198651225	198652033	CRE1692
chr1	198752676	198753389	CRE1693
chr1	198899180	198899939	CRE1694
chr1	198979729	198980500	CRE1695
chr1	198989690	198990401	CRE1696
chr1	199009318	199010840	CRE1697
chr1	199058424	199059186	CRE1698
chr1	199142878	199143707	CRE1699
chr1	199187239	199188014	CRE1700
chr1	199211728	199212498	CRE1701
chr1	199826491	199827214	CRE1702
chr1	199900832	199901618	CRE1703
chr1	200123321	200124031	CRE1704
chr1	200270994	200272162	CRE1705
chr1	200378699	200379759	CRE1706
chr1	200456657	200457366	CRE1707
chr1	200500102	200500898	CRE1708
chr1	200589387	200590858	CRE1709
chr1	200608765	200609493	CRE1710
chr1	200638274	200639549	CRE1711
chr1	200707852	200709045	CRE1712
chr1	200988680	200989589	CRE1713
chr1	201083145	201084190	CRE1714
chr1	201123093	201124069	CRE1715
chr1	201280853	201281662	CRE1716
chr1	201475873	201476822	CRE1717
chr1	201645193	201645913	CRE1718
chr1	201798074	201798926	CRE1719
chr1	201923978	201925037	CRE1720
chr1	201951700	201952841	CRE1721
chr1	202074871	202075582	CRE1722
chr1	202112719	202114278	CRE1723
chr1	202128572	202129788	CRE1724
chr1	202264705	202265627	CRE1725
chr1	202310445	202311832	CRE1726
chr1	202317448	202318409	CRE1727
chr1	202501156	202502019	CRE1728
chr1	202775882	202776713	CRE1729
chr1	202779793	202780710	CRE1730
chr1	202827704	202828527	CRE1731
chr1	202857256	202858367	CRE1732
chr1	202895465	202896620	CRE1733
chr1	202926698	202927651	CRE1734
chr1	202935744	202936638	CRE1735
chr1	202975941	202977212	CRE1736
chr1	202994992	202996077	CRE1737
chr1	203236328	203237187	CRE1738
chr1	203242459	203243540	CRE1739
chr1	203256169	203256879	CRE1740
chr1	203273842	203274886	CRE1741
chr1	203296004	203297437	CRE1742
chr1	203349779	203350595	CRE1743
chr1	203456483	203457545	CRE1744
chr1	203581352	203582427	CRE1745
chr1	203595013	203595849	CRE1746
chr1	203642402	203643392	CRE1747
chr1	203713022	203713801	CRE1748
chr1	203723284	203724138	CRE1749
chr1	203734121	203734884	CRE1750
chr1	203738744	203739505	CRE1751
chr1	203764217	203765721	CRE1752
chr1	203830497	203831426	CRE1753
chr1	204042003	204042849	CRE1754
chr1	204255738	204256612	CRE1755
chr1	204264551	204265264	CRE1756
chr1	204332446	204333214	CRE1757
chr1	204380263	204381170	CRE1758
chr1	204430181	204430999	CRE1759
chr1	204450538	204451317	CRE1760
chr1	204463230	204464116	CRE1761
chr1	204476025	204477019	CRE1762
chr1	204484885	204486066	CRE1763
chr1	204490435	204491177	CRE1764
chr1	205090755	205091935	CRE1765
chr1	205179949	205181102	CRE1766
chr1	205282185	205283054	CRE1767
chr1	205290262	205291076	CRE1768
chr1	205409600	205410603	CRE1769
chr1	205473493	205474260	CRE1770
chr1	205560953	205561672	CRE1771
chr1	205599974	205601536	CRE1772
chr1	205718825	205720033	CRE1773
chr1	205743828	205744674	CRE1774
chr1	205781666	205782497	CRE1775
chr1	205818689	205819581	CRE1776
chr1	206136257	206137789	CRE1777
chr1	206246992	206247757	CRE1778
chr1	206328450	206329219	CRE1779
chr1	206592394	206593103	CRE1780
chr1	206643568	206644700	CRE1781
chr1	206730659	206732564	CRE1782
chr1	206748452	206749180	CRE1783
chr1	206785063	206786070	CRE1784
chr1	206808369	206809412	CRE1785
chr1	206858222	206859619	CRE1786
chr1	206913173	206914005	CRE1787
chr1	206930699	206931400	CRE1788
chr1	206976664	206977393	CRE1789
chr1	207094848	207095559	CRE1790
chr1	207114735	207115465	CRE1791
chr1	207223499	207224930	CRE1792
chr1	207369216	207369961	CRE1793
chr1	207378510	207379362	CRE1794
chr1	207482857	207483568	CRE1795
chr1	207494836	207495888	CRE1796
chr1	207580737	207581565	CRE1797
chr1	207631537	207632336	CRE1798
chr1	207817816	207818576	CRE1799
chr1	207915739	207916889	CRE1800
chr1	207924878	207925830	CRE1801
chr1	208115307	208116069	CRE1802
chr1	208136511	208137399	CRE1803
chr1	208417809	208418780	CRE1804
chr1	209161716	209162916	CRE1805
chr1	209929119	209930051	CRE1806
chr1	209941864	209942946	CRE1807
chr1	209957550	209958526	CRE1808
chr1	209979417	209980193	CRE1809
chr1	210000778	210001779	CRE1810
chr1	210501946	210503125	CRE1811
chr1	210547367	210548095	CRE1812
chr1	211431615	211433288	CRE1813
chr1	211500009	211500825	CRE1814
chr1	211555684	211556611	CRE1815
chr1	211589608	211590383	CRE1816
chr1	211590818	211591546	CRE1817
chr1	211688832	211689552	CRE1818
chr1	211751898	211752773	CRE1819
chr1	211786323	211787035	CRE1820
chr1	211848334	211849279	CRE1821
chr1	211854031	211855012	CRE1822
chr1	212003529	212004550	CRE1823
chr1	212208036	212209146	CRE1824
chr1	212359760	212360608	CRE1825
chr1	212458550	212460086	CRE1826
chr1	212587888	212589106	CRE1827
chr1	212605715	212606881	CRE1828
chr1	212731738	212732798	CRE1829
chr1	212739786	212740763	CRE1830
chr1	212769269	212770256	CRE1831
chr1	212781886	212782701	CRE1832
chr1	212808501	212809220	CRE1833
chr1	212838514	212839290	CRE1834
chr1	212964776	212965766	CRE1835
chr1	213030848	213032159	CRE1836
chr1	213188428	213189660	CRE1837
chr1	213224123	213225106	CRE1838
chr1	213739383	213740102	CRE1839
chr1	214025052	214025760	CRE1840
chr1	214160655	214161390	CRE1841
chr1	214338301	214339073	CRE1842
chr1	214453990	214454851	CRE1843
chr1	214600839	214601962	CRE1844
chr1	214775976	214777238	CRE1845
chr1	215740289	215741611	CRE1846
chr1	216774024	216774743	CRE1847
chr1	217089777	217090495	CRE1848
chr1	217330460	217331170	CRE1849
chr1	217803842	217804945	CRE1850
chr1	218458150	218458990	CRE1851
chr1	218524632	218525361	CRE1852
chr1	219261840	219262618	CRE1853
chr1	219294055	219294896	CRE1854
chr1	219346796	219347951	CRE1855
chr1	219786041	219786754	CRE1856
chr1	220219140	220220593	CRE1857
chr1	220262906	220263748	CRE1858
chr1	220267221	220268235	CRE1859
chr1	220445201	220446292	CRE1860
chr1	220473718	220474434	CRE1861
chr1	220905828	220906592	CRE1862
chr1	221219602	221220322	CRE1863
chr1	221242306	221243049	CRE1864
chr1	221914377	221915119	CRE1865
chr1	221915735	221916694	CRE1866
chr1	221924703	221925457	CRE1867
chr1	222413919	222414716	CRE1868
chr1	222638646	222639618	CRE1869
chr1	222762762	222763667	CRE1870
chr1	222790340	222792032	CRE1871
chr1	222817047	222818138	CRE1872
chr1	222885652	222886802	CRE1873
chr1	222987978	222988813	CRE1874
chr1	223316118	223317372	CRE1875
chr1	223403508	223404234	CRE1876
chr1	223900048	223900819	CRE1877
chr1	223936474	223937219	CRE1878
chr1	224033219	224034223	CRE1879
chr1	224179925	224181242	CRE1880
chr1	224201100	224201810	CRE1881
chr1	224301406	224302409	CRE1882
chr1	224356259	224356976	CRE1883
chr1	224370329	224371417	CRE1884
chr1	224393143	224393851	CRE1885
chr1	224432523	224433494	CRE1886
chr1	224517557	224518496	CRE1887
chr1	224528420	224529225	CRE1888
chr1	224544531	224545349	CRE1889
chr1	224566442	224567218	CRE1890
chr1	224621877	224623252	CRE1891
chr1	224685375	224686130	CRE1892
chr1	224690617	224691395	CRE1893
chr1	224752089	224752997	CRE1894
chr1	224811728	224812684	CRE1895
chr1	225117165	225117914	CRE1896
chr1	225615869	225616667	CRE1897
chr1	225632326	225633206	CRE1898
chr1	225654637	225655905	CRE1899
chr1	225965556	225966466	CRE1900
chr1	226035732	226036819	CRE1901
chr1	226069643	226070514	CRE1902
chr1	226084580	226085477	CRE1903
chr1	226111406	226112584	CRE1904
chr1	226138598	226139329	CRE1905
chr1	226187337	226188150	CRE1906
chr1	226249752	226250464	CRE1907
chr1	226250481	226251359	CRE1908
chr1	226270667	226271687	CRE1909
chr1	226297851	226298818	CRE1910
chr1	226309320	226310163	CRE1911
chr1	226315275	226316160	CRE1912
chr1	226374030	226374996	CRE1913
chr1	226495900	226497085	CRE1914
chr1	226594185	226595750	CRE1915
chr1	226831242	226831947	CRE1916
chr1	226862785	226863541	CRE1917
chr1	226867450	226868153	CRE1918
chr1	226890485	226891675	CRE1919
chr1	226899393	226900264	CRE1920
chr1	226905106	226905863	CRE1921
chr1	226926103	226927055	CRE1922
chr1	226986174	226987006	CRE1923
chr1	227015268	227016162	CRE1924
chr1	227058057	227058839	CRE1925
chr1	227126865	227127747	CRE1926
chr1	227132105	227132812	CRE1927
chr1	227183386	227184171	CRE1928
chr1	227505955	227506680	CRE1929
chr1	227556748	227557502	CRE1930
chr1	227729962	227730892	CRE1931
chr1	227750974	227752108	CRE1932
chr1	227922562	227923510	CRE1933
chr1	228112455	228113589	CRE1934
chr1	228269543	228271116	CRE1935
chr1	228290599	228291880	CRE1936
chr1	228296541	228297621	CRE1937
chr1	228327058	228327842	CRE1938
chr1	228327995	228328969	CRE1939
chr1	228353219	228353983	CRE1940
chr1	228400606	228401595	CRE1941
chr1	228456969	228458024	CRE1942
chr1	228463335	228464267	CRE1943
chr1	228593837	228594721	CRE1944
chr1	228645080	228645799	CRE1945
chr1	228651725	228653248	CRE1946
chr1	228666599	228667761	CRE1947
chr1	228674284	228675087	CRE1948
chr1	228688753	228689501	CRE1949
chr1	228814445	228815182	CRE1950
chr1	228871009	228872189	CRE1951
chr1	229035759	229036802	CRE1952
chr1	229073447	229074378	CRE1953
chr1	229163241	229164182	CRE1954
chr1	229322100	229322876	CRE1955
chr1	229406824	229407698	CRE1956
chr1	229478430	229479429	CRE1957
chr1	229643726	229644672	CRE1958
chr1	229693990	229694720	CRE1959
chr1	229714379	229715116	CRE1960
chr1	229761500	229762468	CRE1961
chr1	229828486	229829189	CRE1962
chr1	229889456	229890380	CRE1963
chr1	229991694	229992542	CRE1964
chr1	230201945	230202695	CRE1965
chr1	230203090	230204236	CRE1966
chr1	230222309	230223025	CRE1967
chr1	230224104	230225053	CRE1968
chr1	230259928	230260670	CRE1969
chr1	230285312	230286448	CRE1970
chr1	230290866	230291612	CRE1971
chr1	230405911	230406632	CRE1972
chr1	230417581	230418515	CRE1973
chr1	230645476	230646401	CRE1974
chr1	230778177	230779037	CRE1975
chr1	231003628	231004495	CRE1976
chr1	231007457	231008161	CRE1977
chr1	231114066	231114789	CRE1978
chr1	231295476	231296190	CRE1979
chr1	231347082	231347856	CRE1980
chr1	231376325	231377170	CRE1981
chr1	231473342	231474204	CRE1982
chr1	231557703	231558749	CRE1983
chr1	231664041	231664883	CRE1984
chr1	231739249	231740172	CRE1985
chr1	231748262	231749173	CRE1986
chr1	231762261	231763365	CRE1987
chr1	231938709	231939509	CRE1988
chr1	231944332	231945046	CRE1989
chr1	232860665	232861402	CRE1990
chr1	232940786	232941605	CRE1991
chr1	233068239	233069240	CRE1992
chr1	233085882	233086786	CRE1993
chr1	233248713	233249884	CRE1994
chr1	233387296	233388093	CRE1995
chr1	233430814	233431955	CRE1996
chr1	234305366	234306273	CRE1997
chr1	234306496	234307198	CRE1998
chr1	234406306	234407117	CRE1999
[truncated: 20,263 more rows]

## Sheet: Probes
Chromosome	Start	End	Target Region	Sense/Antisense
chr12	19667455	19667505	AEBP2|NM_001114176_exon_6_0_chr12_19667605_f_0_2693383	+
chr12	19646613	19646663	AEBP2|NM_001114176_exon_3_0_chr12_19646734_f_0_2693380	+
chr12	19646990	19647040	AEBP2|NM_001114176_exon_3_0_chr12_19646734_f_0_2693380	-
chr12	19673268	19673318	AEBP2|NM_001114176_exon_7_0_chr12_19671021_f_8_2847922	-
chr12	19673537	19673587	AEBP2|NM_001114176_exon_7_0_chr12_19671021_f_9_2847923	-
chr12	19652880	19652930	AEBP2|NM_001114176_exon_4_0_chr12_19653031_f_0_2693381	+
chr12	19592476	19592526	AEBP2|NM_001114176_exon_0_0_chr12_19592608_f_0_2693373	+
chr12	19673110	19673160	AEBP2|NM_001114176_exon_7_0_chr12_19671021_f_9_2847923	+
chr12	19674259	19674309	AEBP2|NM_001114176_exon_7_0_chr12_19671021_f_12_2847926	-
chr12	19672052	19672102	AEBP2|NM_001114176_exon_7_0_chr12_19671021_f_3_2847917	-
chr12	19672313	19672363	AEBP2|NM_001114176_exon_7_0_chr12_19671021_f_4_2847918	-
chr12	19673042	19673092	AEBP2|NM_001114176_exon_7_0_chr12_19671021_f_7_2847921	-
chr12	19592865	19592915	AEBP2|NM_001114176_exon_0_0_chr12_19592608_f_0_2693373	-
chr12	19592878	19592928	AEBP2|NM_001114176_exon_0_0_chr12_19592608_f_2_2693375	+
chr12	19671112	19671162	AEBP2|NM_001114176_exon_7_0_chr12_19671021_f_1_2847915	+
chr12	19593317	19593367	AEBP2|NM_001114176_exon_0_0_chr12_19592608_f_2_2693375	-
chr12	19667803	19667853	AEBP2|NM_001114176_exon_6_0_chr12_19667605_f_0_2693383	-
chr12	19671324	19671374	AEBP2|NM_001114176_exon_7_0_chr12_19671021_f_0_2693384	-
chr12	19670903	19670953	AEBP2|NM_001114176_exon_7_0_chr12_19671021_f_0_2693384	+
chr12	19671648	19671698	AEBP2|NM_001114176_exon_7_0_chr12_19671021_f_3_2847917	+
chr12	19593390	19593440	AEBP2|NM_001267043_exon_0_0_chr12_19593515_f_0_2693377	+
chr12	19653259	19653309	AEBP2|NM_001114176_exon_4_0_chr12_19653031_f_0_2693381	-
chr12	19615315	19615365	AEBP2|NM_001114176_exon_1_0_chr12_19615444_f_0_2693378	+
chr12	19672614	19672664	AEBP2|NM_001114176_exon_7_0_chr12_19671021_f_7_2847921	+
chr12	19593759	19593809	AEBP2|NM_001267043_exon_0_0_chr12_19593515_f_0_2693377	-
chr12	19672790	19672840	AEBP2|NM_001114176_exon_7_0_chr12_19671021_f_6_2847920	-
chr12	19672873	19672923	AEBP2|NM_001114176_exon_7_0_chr12_19671021_f_8_2847922	+
chr12	19615726	19615776	AEBP2|NM_001114176_exon_1_0_chr12_19615444_f_0_2693378	-
chr12	19671567	19671617	AEBP2|NM_001114176_exon_7_0_chr12_19671021_f_1_2847915	-
chr12	19674319	19674369	AEBP2|NM_001114176_exon_7_0_chr12_19671021_f_14_2847928	+
chr12	19675240	19675290	AEBP2|NM_001114176_exon_7_0_chr12_19671021_f_16_2847930	-
chr12	19672120	19672170	AEBP2|NM_001114176_exon_7_0_chr12_19671021_f_5_2847919	+
chr12	19671820	19671870	AEBP2|NM_001114176_exon_7_0_chr12_19671021_f_2_2847916	-
chr12	19673569	19673619	AEBP2|NM_001114176_exon_7_0_chr12_19671021_f_11_2847925	+
chr12	19673358	19673408	AEBP2|NM_001114176_exon_7_0_chr12_19671021_f_10_2847924	+
chr12	19592697	19592747	AEBP2|NM_001114176_exon_0_0_chr12_19592608_f_1_2693374	+
chr12	19593537	19593587	AEBP2|NM_001114176_exon_0_0_chr12_19592608_f_3_2693376	-
chr12	19671881	19671931	AEBP2|NM_001114176_exon_7_0_chr12_19671021_f_4_2847918	+
chr12	19672382	19672432	AEBP2|NM_001114176_exon_7_0_chr12_19671021_f_6_2847920	+
chr12	19672537	19672587	AEBP2|NM_001114176_exon_7_0_chr12_19671021_f_5_2847919	-
chr12	19674748	19674798	AEBP2|NM_001114176_exon_7_0_chr12_19671021_f_14_2847928	-
chr12	19665508	19665558	AEBP2|NM_001114176_exon_5_0_chr12_19665332_f_0_2693382	-
chr12	19674579	19674629	AEBP2|NM_001114176_exon_7_0_chr12_19671021_f_15_2847929	+
chr12	19626036	19626086	AEBP2|NM_001114176_exon_2_0_chr12_19626182_f_0_2693379	+
chr12	19674818	19674868	AEBP2|NM_001114176_exon_7_0_chr12_19671021_f_16_2847930	+
chr12	19671405	19671455	AEBP2|NM_001114176_exon_7_0_chr12_19671021_f_2_2847916	+
chr12	19674505	19674555	AEBP2|NM_001114176_exon_7_0_chr12_19671021_f_13_2847927	-
chr12	19675003	19675053	AEBP2|NM_001114176_exon_7_0_chr12_19671021_f_15_2847929	-
chr12	19665289	19665339	AEBP2|NM_001114176_exon_5_0_chr12_19665332_f_0_2693382	+
chr12	19674149	19674199	AEBP2|NM_001114176_exon_7_0_chr12_19671021_f_13_2847927	+
chr1	27089326	27089376	ARID1A|NM_006015_exon_7_0_chr1_27089464_f_0_2823723	+
chr1	27101783	27101833	ARID1A|NM_006015_exon_17_0_chr1_27100820_f_3_2663026	-
chr1	27056430	27056480	ARID1A|NM_006015_exon_1_0_chr1_27056142_f_0_2663001	-
chr1	27092952	27093002	ARID1A|NM_006015_exon_8_0_chr1_27092712_f_0_2663014	-
chr1	27089480	27089530	ARID1A|NM_006015_exon_7_0_chr1_27089464_f_1_2823725	+
chr1	27022618	27022668	ARID1A|NM_006015_exon_0_0_chr1_27022522_f_1_2823691	+
chr1	27093146	27093196	ARID1A|NM_006015_exon_9_0_chr1_27092948_f_0_2663015	-
chr1	27105648	27105698	ARID1A|NM_006015_exon_19_0_chr1_27105514_f_1_2823753	+
chr1	27058157	27058207	ARID1A|NM_006015_exon_2_0_chr1_27057643_f_1_2663003	-
chr1	27108439	27108489	ARID1A|NM_006015_exon_19_0_chr1_27105514_f_11_2823773	-
chr1	27107069	27107119	ARID1A|NM_006015_exon_19_0_chr1_27105514_f_7_2823765	+
chr1	27057947	27057997	ARID1A|NM_006015_exon_2_0_chr1_27057643_f_0_2663002	-
chr1	27101361	27101411	ARID1A|NM_006015_exon_17_0_chr1_27100820_f_3_2663026	+
chr1	27106101	27106151	ARID1A|NM_006015_exon_19_0_chr1_27105514_f_3_2823757	+
chr1	27099567	27099617	ARID1A|NM_006015_exon_13_0_chr1_27099303_f_0_2663019	-
chr1	27108005	27108055	ARID1A|NM_006015_exon_19_0_chr1_27105514_f_11_2823773	+
chr1	27097898	27097948	ARID1A|NM_006015_exon_11_0_chr1_27097610_f_0_2663017	-
chr1	27099713	27099763	ARID1A|NM_006015_exon_14_0_chr1_27099837_f_0_2663020	+
chr1	27108189	27108239	ARID1A|NM_006015_exon_19_0_chr1_27105514_f_10_2823771	-
chr1	27023456	27023506	ARID1A|NM_006015_exon_0_0_chr1_27022522_f_3_2823695	-
chr1	27107708	27107758	ARID1A|NM_006015_exon_19_0_chr1_27105514_f_8_2823767	-
chr1	27022395	27022445	ARID1A|NM_006015_exon_0_0_chr1_27022522_f_0_2823689	+
chr1	27100290	27100340	ARID1A|NM_006015_exon_15_0_chr1_27100071_f_0_2663021	-
chr1	27088888	27088938	ARID1A|NM_006015_exon_6_0_chr1_27088643_f_0_2663011	-
chr1	27099216	27099266	ARID1A|NM_006015_exon_12_0_chr1_27098991_f_0_2663018	-
chr1	27108655	27108705	ARID1A|NM_006015_exon_19_0_chr1_27105514_f_12_2823775	-
chr1	27108241	27108291	ARID1A|NM_006015_exon_19_0_chr1_27105514_f_12_2823775	+
chr1	27102276	27102326	ARID1A|NM_006015_exon_18_0_chr1_27102068_f_0_2663027	-
chr1	27023027	27023077	ARID1A|NM_006015_exon_0_0_chr1_27022522_f_1_2823691	-
chr1	27094171	27094221	ARID1A|NM_006015_exon_10_0_chr1_27094281_f_0_2663016	+
chr1	27087714	27087764	ARID1A|NM_006015_exon_5_0_chr1_27087875_f_0_2663010	+
chr1	27105826	27105876	ARID1A|NM_006015_exon_19_0_chr1_27105514_f_0_2823751	-
chr1	27107469	27107519	ARID1A|NM_006015_exon_19_0_chr1_27105514_f_7_2823765	-
chr1	27100477	27100527	ARID1A|NM_006015_exon_16_0_chr1_27100293_f_0_2663022	-
chr1	27106995	27107045	ARID1A|NM_006015_exon_19_0_chr1_27105514_f_5_2823761	-
chr1	27057756	27057806	ARID1A|NM_006015_exon_2_0_chr1_27057643_f_1_2663003	+
chr1	27059025	27059075	ARID1A|NM_006015_exon_3_0_chr1_27059167_f_0_2663004	+
chr1	27101101	27101151	ARID1A|NM_006015_exon_17_0_chr1_27100820_f_0_2663023	-
chr1	27101344	27101394	ARID1A|NM_006015_exon_17_0_chr1_27100820_f_1_2663024	-
chr1	27098845	27098895	ARID1A|NM_006015_exon_12_0_chr1_27098991_f_0_2663018	+
chr1	27099180	27099230	ARID1A|NM_006015_exon_13_0_chr1_27099303_f_0_2663019	+
chr1	27059380	27059430	ARID1A|NM_006015_exon_3_0_chr1_27059167_f_0_2663004	-
chr1	27106362	27106412	ARID1A|NM_006015_exon_19_0_chr1_27105514_f_4_2823759	+
chr1	27106531	27106581	ARID1A|NM_006015_exon_19_0_chr1_27105514_f_3_2823757	-
chr1	27107305	27107355	ARID1A|NM_006015_exon_19_0_chr1_27105514_f_8_2823767	+
chr1	27089699	27089749	ARID1A|NM_006015_exon_7_0_chr1_27089464_f_0_2823723	-
chr1	27023044	27023094	ARID1A|NM_006015_exon_0_0_chr1_27022522_f_3_2823695	+
chr1	27023697	27023747	ARID1A|NM_006015_exon_0_0_chr1_27022522_f_6_2823701	+
chr1	27107963	27108013	ARID1A|NM_006015_exon_19_0_chr1_27105514_f_9_2823769	-
chr1	27022840	27022890	ARID1A|NM_006015_exon_0_0_chr1_27022522_f_2_2823693	+
chr1	27092585	27092635	ARID1A|NM_006015_exon_8_0_chr1_27092712_f_0_2663014	+
chr1	27101562	27101612	ARID1A|NM_006015_exon_17_0_chr1_27100820_f_2_2663025	-
chr1	27023668	27023718	ARID1A|NM_006015_exon_0_0_chr1_27022522_f_4_2823697	-
chr1	27087242	27087292	ARID1A|NM_006015_exon_4_0_chr1_27087347_f_0_2663009	+
chr1	27107274	27107324	ARID1A|NM_006015_exon_19_0_chr1_27105514_f_6_2823763	-
chr1	27099925	27099975	ARID1A|NM_006015_exon_15_0_chr1_27100071_f_0_2663021	+
chr1	27106300	27106350	ARID1A|NM_006015_exon_19_0_chr1_27105514_f_2_2823755	-
chr1	27100137	27100187	ARID1A|NM_006015_exon_16_0_chr1_27100293_f_0_2663022	+
chr1	27057521	27057571	ARID1A|NM_006015_exon_2_0_chr1_27057643_f_0_2663002	+
chr1	27107538	27107588	ARID1A|NM_006015_exon_19_0_chr1_27105514_f_9_2823769	+
chr1	27097492	27097542	ARID1A|NM_006015_exon_11_0_chr1_27097610_f_0_2663017	+
chr1	27100927	27100977	ARID1A|NM_006015_exon_17_0_chr1_27100820_f_1_2663024	+
chr1	27092794	27092844	ARID1A|NM_006015_exon_9_0_chr1_27092948_f_0_2663015	+
chr1	27106039	27106089	ARID1A|NM_006015_exon_19_0_chr1_27105514_f_1_2823753	-
chr1	27024099	27024149	ARID1A|NM_006015_exon_0_0_chr1_27022522_f_6_2823701	-
chr1	27087662	27087712	ARID1A|NM_006015_exon_4_0_chr1_27087347_f_0_2663009	-
chr1	27106829	27106879	ARID1A|NM_006015_exon_19_0_chr1_27105514_f_6_2823763	+
chr1	27100692	27100742	ARID1A|NM_006015_exon_17_0_chr1_27100820_f_0_2663023	+
chr1	27023484	27023534	ARID1A|NM_006015_exon_0_0_chr1_27022522_f_5_2823699	+
chr1	27088499	27088549	ARID1A|NM_006015_exon_6_0_chr1_27088643_f_0_2663011	+
chr1	27022834	27022884	ARID1A|NM_006015_exon_0_0_chr1_27022522_f_0_2823689	-
chr1	27106762	27106812	ARID1A|NM_006015_exon_19_0_chr1_27105514_f_4_2823759	-
chr1	27107787	27107837	ARID1A|NM_006015_exon_19_0_chr1_27105514_f_10_2823771	+
chr1	27101137	27101187	ARID1A|NM_006015_exon_17_0_chr1_27100820_f_2_2663025	+
chr1	27105395	27105445	ARID1A|NM_006015_exon_19_0_chr1_27105514_f_0_2823751	+
chr1	27056010	27056060	ARID1A|NM_006015_exon_1_0_chr1_27056142_f_0_2663001	+
chr1	27100068	27100118	ARID1A|NM_006015_exon_14_0_chr1_27099837_f_0_2663020	-
chr1	27089861	27089911	ARID1A|NM_006015_exon_7_0_chr1_27089464_f_1_2823725	-
chr1	27023178	27023228	ARID1A|NM_006015_exon_0_0_chr1_27022522_f_2_2823693	-
chr1	27023331	27023381	ARID1A|NM_006015_exon_0_0_chr1_27022522_f_4_2823697	+
chr1	27106591	27106641	ARID1A|NM_006015_exon_19_0_chr1_27105514_f_5_2823761	+
chr1	27102025	27102075	ARID1A|NM_006015_exon_18_0_chr1_27102068_f_0_2663027	+
chr1	27087965	27088015	ARID1A|NM_006015_exon_5_0_chr1_27087875_f_0_2663010	-
chr1	27094569	27094619	ARID1A|NM_006015_exon_10_0_chr1_27094281_f_0_2663016	-
chr1	27023816	27023866	ARID1A|NM_006015_exon_0_0_chr1_27022522_f_5_2823699	-
chr1	27105863	27105913	ARID1A|NM_006015_exon_19_0_chr1_27105514_f_2_2823755	+
chr6	157192556	157192606	ARID1B|NM_020732_exon_2_0_chr6_157192748_f_0_2772434	+
chr6	157431442	157431492	ARID1B|NM_017519_exon_5_0_chr6_157431606_f_0_2772455	+
chr6	157495346	157495396	ARID1B|NM_017519_exon_9_0_chr6_157495142_f_0_2772460	-
chr6	157529545	157529595	ARID1B|NM_017519_exon_18_0_chr6_157527301_f_8_2903001	-
chr6	157454419	157454469	ARID1B|NM_017519_exon_6_0_chr6_157454162_f_0_2772456	-
chr6	157529604	157529654	ARID1B|NM_017519_exon_18_0_chr6_157527301_f_10_2903003	+
chr6	157529070	157529120	ARID1B|NM_017519_exon_18_0_chr6_157527301_f_6_2902999	-
chr6	157501972	157502022	ARID1B|NM_017519_exon_10_0_chr6_157502103_f_0_2772461	+
chr6	157530354	157530404	ARID1B|NM_017519_exon_18_0_chr6_157527301_f_13_2903006	+
chr6	157150242	157150292	ARID1B|NM_017519_exon_1_0_chr6_157150361_f_0_2772433	+
chr6	157150641	157150691	ARID1B|NM_017519_exon_1_0_chr6_157150361_f_0_2772433	-
chr6	157527606	157527656	ARID1B|NM_017519_exon_18_0_chr6_157527301_f_0_2902993	-
chr6	157530532	157530582	ARID1B|NM_017519_exon_18_0_chr6_157527301_f_12_2903005	-
chr6	157529294	157529344	ARID1B|NM_017519_exon_18_0_chr6_157527301_f_7_2903000	-
chr6	157517525	157517575	ARID1B|NM_017519_exon_14_0_chr6_157517299_f_0_2772465	-
chr6	157431788	157431838	ARID1B|NM_017519_exon_5_0_chr6_157431606_f_0_2772455	-
chr6	157192898	157192948	ARID1B|NM_020732_exon_2_0_chr6_157192748_f_0_2772434	-
chr6	157529779	157529829	ARID1B|NM_017519_exon_18_0_chr6_157527301_f_9_2903002	-
chr6	157222767	157222817	ARID1B|NM_017519_exon_2_0_chr6_157222510_f_0_2772435	-
chr6	157531060	157531110	ARID1B|NM_017519_exon_18_0_chr6_157527301_f_16_2903009	+
chr6	157528161	157528211	ARID1B|NM_017519_exon_18_0_chr6_157527301_f_4_2902997	+
chr6	157099551	157099601	ARID1B|NM_017519_exon_0_0_chr6_157099064_f_1_2902974	-
chr6	157531989	157532039	ARID1B|NM_017519_exon_18_0_chr6_157527301_f_18_2903011	-
chr6	157531496	157531546	ARID1B|NM_017519_exon_18_0_chr6_157527301_f_16_2903009	-
chr6	157528643	157528693	ARID1B|NM_017519_exon_18_0_chr6_157527301_f_6_2902999	+
chr6	157100254	157100304	ARID1B|NM_017519_exon_0_0_chr6_157099064_f_4_2902977	-
chr6	157502388	157502438	ARID1B|NM_017519_exon_10_0_chr6_157502103_f_0_2772461	-
chr6	157524851	157524901	ARID1B|NM_017519_exon_17_0_chr6_157525000_f_0_2772471	+
chr6	157522491	157522541	ARID1B|NM_017519_exon_16_0_chr6_157521839_f_2_2772469	-
chr6	157527438	157527488	ARID1B|NM_017519_exon_18_0_chr6_157527301_f_1_2902994	+
chr6	157405691	157405741	ARID1B|NM_017519_exon_4_0_chr6_157405796_f_0_2772454	+
chr6	157520137	157520187	ARID1B|NM_017519_exon_15_0_chr6_157519945_f_0_2772466	-
chr6	157505636	157505686	ARID1B|NM_017519_exon_11_0_chr6_157505365_f_0_2772462	-
chr6	157488408	157488458	ARID1B|NM_017519_exon_8_0_chr6_157488174_f_0_2772459	-
chr6	157488044	157488094	ARID1B|NM_017519_exon_8_0_chr6_157488174_f_0_2772459	+
chr6	157527178	157527228	ARID1B|NM_017519_exon_18_0_chr6_157527301_f_0_2902993	+
chr6	157256818	157256868	ARID1B|NM_017519_exon_3_0_chr6_157256600_f_0_2772436	-
chr6	157522291	157522341	ARID1B|NM_017519_exon_16_0_chr6_157521839_f_1_2772468	-
chr6	157505240	157505290	ARID1B|NM_017519_exon_11_0_chr6_157505365_f_0_2772462	+
chr6	157522297	157522347	ARID1B|NM_017519_exon_16_0_chr6_157521839_f_3_2772470	+
chr6	157511002	157511052	ARID1B|NM_017519_exon_12_0_chr6_157510776_f_0_2772463	-
chr6	157529119	157529169	ARID1B|NM_017519_exon_18_0_chr6_157527301_f_8_2903001	+
chr6	157528575	157528625	ARID1B|NM_017519_exon_18_0_chr6_157527301_f_4_2902997	-
chr6	157531552	157531602	ARID1B|NM_017519_exon_18_0_chr6_157527301_f_18_2903011	+
chr6	157522121	157522171	ARID1B|NM_017519_exon_16_0_chr6_157521839_f_0_2772467	-
chr6	157528887	157528937	ARID1B|NM_017519_exon_18_0_chr6_157527301_f_7_2903000	+
chr6	157529385	157529435	ARID1B|NM_017519_exon_18_0_chr6_157527301_f_9_2903002	+
chr6	157530768	157530818	ARID1B|NM_017519_exon_18_0_chr6_157527301_f_13_2903006	-
chr6	157529863	157529913	ARID1B|NM_017519_exon_18_0_chr6_157527301_f_11_2903004	+
chr6	157100266	157100316	ARID1B|NM_017519_exon_0_0_chr6_157099064_f_6_2902979	+
chr6	157531254	157531304	ARID1B|NM_017519_exon_18_0_chr6_157527301_f_15_2903008	-
chr6	157530996	157531046	ARID1B|NM_017519_exon_18_0_chr6_157527301_f_14_2903007	-
chr6	157528339	157528389	ARID1B|NM_017519_exon_18_0_chr6_157527301_f_3_2902996	-
chr6	157470001	157470051	ARID1B|NM_017519_exon_7_0_chr6_157469758_f_0_2772457	-
chr6	157530842	157530892	ARID1B|NM_017519_exon_18_0_chr6_157527301_f_15_2903008	+
chr6	157531327	157531377	ARID1B|NM_017519_exon_18_0_chr6_157527301_f_17_2903010	+
chr6	157521910	157521960	ARID1B|NM_017519_exon_16_0_chr6_157521839_f_1_2772468	+
chr6	157099584	157099634	ARID1B|NM_017519_exon_0_0_chr6_157099064_f_3_2902976	+
chr6	157528399	157528449	ARID1B|NM_017519_exon_18_0_chr6_157527301_f_5_2902998	+
chr6	157099804	157099854	ARID1B|NM_017519_exon_0_0_chr6_157099064_f_2_2902975	-
chr6	157527662	157527712	ARID1B|NM_017519_exon_18_0_chr6_157527301_f_2_2902995	+
chr6	157495004	157495054	ARID1B|NM_017519_exon_9_0_chr6_157495142_f_0_2772460	+
chr6	157521725	157521775	ARID1B|NM_017519_exon_16_0_chr6_157521839_f_0_2772467	+
chr6	157531720	157531770	ARID1B|NM_017519_exon_18_0_chr6_157527301_f_17_2903010	-
chr6	157454038	157454088	ARID1B|NM_017519_exon_6_0_chr6_157454162_f_0_2772456	+
chr6	157519804	157519854	ARID1B|NM_017519_exon_15_0_chr6_157519945_f_0_2772466	+
chr6	157469798	157469848	ARID1B|NM_017519_exon_7_0_chr6_157469758_f_1_2772458	+
chr6	157522116	157522166	ARID1B|NM_017519_exon_16_0_chr6_157521839_f_2_2772469	+
chr6	157527839	157527889	ARID1B|NM_017519_exon_18_0_chr6_157527301_f_1_2902994	-
chr6	157528104	157528154	ARID1B|NM_017519_exon_18_0_chr6_157527301_f_2_2902995	-
chr6	157100450	157100500	ARID1B|NM_017519_exon_0_0_chr6_157099064_f_5_2902978	-
chr6	157099129	157099179	ARID1B|NM_017519_exon_0_0_chr6_157099064_f_1_2902974	+
chr6	157530579	157530629	ARID1B|NM_017519_exon_18_0_chr6_157527301_f_14_2903007	+
chr6	157530036	157530086	ARID1B|NM_017519_exon_18_0_chr6_157527301_f_10_2903003	-
chr6	157406098	157406148	ARID1B|NM_017519_exon_4_0_chr6_157405796_f_0_2772454	-
chr6	157528826	157528876	ARID1B|NM_017519_exon_18_0_chr6_157527301_f_5_2902998	-
chr6	157222371	157222421	ARID1B|NM_017519_exon_2_0_chr6_157222510_f_0_2772435	+
chr6	157469630	157469680	ARID1B|NM_017519_exon_7_0_chr6_157469758_f_0_2772457	+
chr6	157525210	157525260	ARID1B|NM_017519_exon_17_0_chr6_157525000_f_0_2772471	-
chr6	157256546	157256596	ARID1B|NM_017519_exon_3_0_chr6_157256600_f_0_2772436	+
chr6	157517235	157517285	ARID1B|NM_017519_exon_14_0_chr6_157517299_f_0_2772465	+
chr6	157511035	157511085	ARID1B|NM_017519_exon_13_0_chr6_157511172_f_0_2772464	+
chr6	157099247	157099297	ARID1B|NM_017519_exon_0_0_chr6_157099064_f_0_2772426	-
chr6	157510716	157510766	ARID1B|NM_017519_exon_12_0_chr6_157510776_f_0_2772463	+
chr6	157530098	157530148	ARID1B|NM_017519_exon_18_0_chr6_157527301_f_12_2903005	+
chr6	157470164	157470214	ARID1B|NM_017519_exon_7_0_chr6_157469758_f_1_2772458	-
chr6	157511353	157511403	ARID1B|NM_017519_exon_13_0_chr6_157511172_f_0_2772464	-
chr6	157527908	157527958	ARID1B|NM_017519_exon_18_0_chr6_157527301_f_3_2902996	+
chr6	157522683	157522733	ARID1B|NM_017519_exon_16_0_chr6_157521839_f_3_2772470	-
chr6	157099818	157099868	ARID1B|NM_017519_exon_0_0_chr6_157099064_f_4_2902977	+
chr6	157530280	157530330	ARID1B|NM_017519_exon_18_0_chr6_157527301_f_11_2903004	-
chr6	157100606	157100656	ARID1B|NM_017519_exon_0_0_chr6_157099064_f_6_2902979	-
chr6	157099925	157099975	ARID1B|NM_017519_exon_0_0_chr6_157099064_f_3_2902976	-
chr20	30946990	30947040	ASXL1|NM_001164603_exon_0_0_chr20_30946147_f_6_2748685	-
chr20	31022122	31022172	ASXL1|NM_015338_exon_11_0_chr20_31022235_f_0_2748700	+
chr20	30946101	30946151	ASXL1|NM_001164603_exon_0_0_chr20_30946147_f_4_2748683	+
chr20	31017000	31017050	ASXL1|NM_015338_exon_5_0_chr20_31017141_f_0_2748692	+
chr20	31024800	31024850	ASXL1|NM_015338_exon_11_0_chr20_31022235_f_11_2885533	+
chr20	31026201	31026251	ASXL1|NM_015338_exon_11_0_chr20_31022235_f_15_2885539	-
chr20	31022361	31022411	ASXL1|NM_015338_exon_11_0_chr20_31022235_f_1_2885518	+
chr20	31023266	31023316	ASXL1|NM_015338_exon_11_0_chr20_31022235_f_3_2885521	-
chr20	31019224	31019274	ASXL1|NM_015338_exon_8_0_chr20_31019386_f_0_2748695	+
chr20	31022856	31022906	ASXL1|NM_015338_exon_11_0_chr20_31022235_f_3_2885521	+
chr20	30945370	30945420	ASXL1|NM_001164603_exon_0_0_chr20_30946147_f_1_2748680	+
chr20	30945532	30945582	ASXL1|NM_001164603_exon_0_0_chr20_30946147_f_0_2748679	-
chr20	31025794	31025844	ASXL1|NM_015338_exon_11_0_chr20_31022235_f_15_2885539	+
chr20	31020972	31021022	ASXL1|NM_015338_exon_10_0_chr20_31021087_f_0_2748697	+
chr20	31021361	31021411	ASXL1|NM_015338_exon_10_0_chr20_31021087_f_0_2748697	-
chr20	31022547	31022597	ASXL1|NM_015338_exon_11_0_chr20_31022235_f_0_2748700	-
chr20	30954037	30954087	ASXL1|NM_001164603_exon_1_0_chr20_30954187_f_0_2748686	+
chr20	31016327	31016377	ASXL1|NM_015338_exon_4_0_chr20_31016128_f_0_2748691	-
chr20	31021567	31021617	ASXL1|NM_015338_exon_10_0_chr20_31021087_f_1_2885512	-
chr20	31024318	31024368	ASXL1|NM_015338_exon_11_0_chr20_31022235_f_9_2885530	+
chr20	31023354	31023404	ASXL1|NM_015338_exon_11_0_chr20_31022235_f_5_2885524	+
chr20	31017935	31017985	ASXL1|NM_015338_exon_6_0_chr20_31017704_f_0_2748693	-
chr20	31021170	31021220	ASXL1|NM_015338_exon_10_0_chr20_31021087_f_1_2885512	+
chr20	31017340	31017390	ASXL1|NM_015338_exon_5_0_chr20_31017141_f_0_2748692	-
chr20	31021391	31021441	ASXL1|NM_015338_exon_10_0_chr20_31021087_f_2_2885514	+
chr20	31027171	31027221	ASXL1|NM_015338_exon_11_0_chr20_31022235_f_19_2885545	-
chr20	31023100	31023150	ASXL1|NM_015338_exon_11_0_chr20_31022235_f_4_2885523	+
chr20	31026448	31026498	ASXL1|NM_015338_exon_11_0_chr20_31022235_f_16_2885540	-
chr20	31026936	31026986	ASXL1|NM_015338_exon_11_0_chr20_31022235_f_18_2885543	-
chr20	30946759	30946809	ASXL1|NM_001164603_exon_0_0_chr20_30946147_f_5_2748684	-
chr20	31025239	31025289	ASXL1|NM_015338_exon_11_0_chr20_31022235_f_11_2885533	-
chr20	30946030	30946080	ASXL1|NM_001164603_exon_0_0_chr20_30946147_f_2_2748681	-
chr20	31015981	31016031	ASXL1|NM_015338_exon_4_0_chr20_31016128_f_0_2748691	+
chr20	31019570	31019620	ASXL1|NM_015338_exon_8_0_chr20_31019386_f_0_2748695	-
chr20	31026759	31026809	ASXL1|NM_015338_exon_11_0_chr20_31022235_f_19_2885545	+
chr20	31025967	31026017	ASXL1|NM_015338_exon_11_0_chr20_31022235_f_14_2885537	-
chr20	31025719	31025769	ASXL1|NM_015338_exon_11_0_chr20_31022235_f_13_2885536	-
chr20	31020883	31020933	ASXL1|NM_015338_exon_9_0_chr20_31020683_f_0_2748696	-
chr20	31025466	31025516	ASXL1|NM_015338_exon_11_0_chr20_31022235_f_12_2885535	-
chr20	30959804	30959854	ASXL1|NM_001164603_exon_3_0_chr20_30959967_f_0_2748688	+
chr20	30960041	30960091	ASXL1|NM_001164603_exon_3_0_chr20_30959967_f_1_2748689	+
chr20	31022622	31022672	ASXL1|NM_015338_exon_11_0_chr20_31022235_f_2_2885519	+
chr20	31019003	31019053	ASXL1|NM_015338_exon_7_0_chr20_31019124_f_0_2748694	+
chr20	31023760	31023810	ASXL1|NM_015338_exon_11_0_chr20_31022235_f_5_2885524	-
chr20	31025291	31025341	ASXL1|NM_015338_exon_11_0_chr20_31022235_f_13_2885536	+
chr20	31024560	31024610	ASXL1|NM_015338_exon_11_0_chr20_31022235_f_10_2885532	+
chr20	31024983	31025033	ASXL1|NM_015338_exon_11_0_chr20_31022235_f_10_2885532	-
chr20	30946332	30946382	ASXL1|NM_001164603_exon_0_0_chr20_30946147_f_5_2748684	+
chr20	30946514	30946564	ASXL1|NM_001164603_exon_0_0_chr20_30946147_f_4_2748683	-
chr20	31025550	31025600	ASXL1|NM_015338_exon_11_0_chr20_31022235_f_14_2885537	+
chr20	31025048	31025098	ASXL1|NM_015338_exon_11_0_chr20_31022235_f_12_2885535	+
chr20	31023836	31023886	ASXL1|NM_015338_exon_11_0_chr20_31022235_f_7_2885527	+
chr20	31024076	31024126	ASXL1|NM_015338_exon_11_0_chr20_31022235_f_8_2885529	+
chr20	30945609	30945659	ASXL1|NM_001164603_exon_0_0_chr20_30946147_f_2_2748681	+
chr20	30956676	30956726	ASXL1|NM_001164603_exon_2_0_chr20_30956815_f_0_2748687	+
chr20	31026023	31026073	ASXL1|NM_015338_exon_11_0_chr20_31022235_f_16_2885540	+
chr20	31016147	31016197	ASXL1|NM_015338_exon_3_0_chr20_31015931_f_0_2748690	-
chr20	31015781	31015831	ASXL1|NM_015338_exon_3_0_chr20_31015931_f_0_2748690	+
chr20	31019368	31019418	ASXL1|NM_015338_exon_7_0_chr20_31019124_f_0_2748694	-
chr20	31020531	31020581	ASXL1|NM_015338_exon_9_0_chr20_31020683_f_0_2748696	+
chr20	31017565	31017615	ASXL1|NM_015338_exon_6_0_chr20_31017704_f_0_2748693	+
chr20	30954385	30954435	ASXL1|NM_001164603_exon_1_0_chr20_30954187_f_0_2748686	-
chr20	31026514	31026564	ASXL1|NM_015338_exon_11_0_chr20_31022235_f_18_2885543	+
chr20	31021795	31021845	ASXL1|NM_015338_exon_10_0_chr20_31021087_f_2_2885514	-
chr20	31023022	31023072	ASXL1|NM_015338_exon_11_0_chr20_31022235_f_2_2885519	-
chr20	31024018	31024068	ASXL1|NM_015338_exon_11_0_chr20_31022235_f_6_2885526	-
chr20	31024506	31024556	ASXL1|NM_015338_exon_11_0_chr20_31022235_f_8_2885529	-
chr20	31023523	31023573	ASXL1|NM_015338_exon_11_0_chr20_31022235_f_4_2885523	-
chr20	31026289	31026339	ASXL1|NM_015338_exon_11_0_chr20_31022235_f_17_2885542	+
chr20	31026697	31026747	ASXL1|NM_015338_exon_11_0_chr20_31022235_f_17_2885542	-
chr20	30945855	30945905	ASXL1|NM_001164603_exon_0_0_chr20_30946147_f_3_2748682	+
chr20	30946568	30946618	ASXL1|NM_001164603_exon_0_0_chr20_30946147_f_6_2748685	+
chr20	30945777	30945827	ASXL1|NM_001164603_exon_0_0_chr20_30946147_f_1_2748680	-
chr20	31022786	31022836	ASXL1|NM_015338_exon_11_0_chr20_31022235_f_1_2885518	-
chr20	31023579	31023629	ASXL1|NM_015338_exon_11_0_chr20_31022235_f_6_2885526	+
chr20	30960163	30960213	ASXL1|NM_001164603_exon_3_0_chr20_30959967_f_0_2748688	-
chr20	31024730	31024780	ASXL1|NM_015338_exon_11_0_chr20_31022235_f_9_2885530	-
chr20	30960343	30960393	ASXL1|NM_001164603_exon_3_0_chr20_30959967_f_1_2748689	-
chr20	30946257	30946307	ASXL1|NM_001164603_exon_0_0_chr20_30946147_f_3_2748682	-
chr20	31024262	31024312	ASXL1|NM_015338_exon_11_0_chr20_31022235_f_7_2885527	-
chr20	30945174	30945224	ASXL1|NM_001164603_exon_0_0_chr20_30946147_f_0_2748679	+
chr2	25982608	25982658	ASXL2|NM_018263_exon_4_0_chr2_25982351_r_0_2741553	-
chr2	26101139	26101189	ASXL2|NM_018263_exon_11_0_chr2_26101035_r_2_2876035	-
chr2	25991465	25991515	ASXL2|NM_018263_exon_6_0_chr2_25991611_r_0_2741555	+
chr2	25966998	25967048	ASXL2|NM_018263_exon_0_0_chr2_25962253_r_20_2876016	+
chr2	25982213	25982263	ASXL2|NM_018263_exon_4_0_chr2_25982351_r_0_2741553	+
chr2	25963294	25963344	ASXL2|NM_018263_exon_0_0_chr2_25962253_r_3_2875987	-
chr2	25964076	25964126	ASXL2|NM_018263_exon_0_0_chr2_25962253_r_8_2875995	+
chr2	25973341	25973391	ASXL2|NM_018263_exon_1_0_chr2_25972565_r_2_2876021	-
chr2	25965525	25965575	ASXL2|NM_018263_exon_0_0_chr2_25962253_r_14_2876006	+
chr2	25963363	25963413	ASXL2|NM_018263_exon_0_0_chr2_25962253_r_5_2875990	+
chr2	25967175	25967225	ASXL2|NM_018263_exon_0_0_chr2_25962253_r_19_2876014	-
chr2	25966756	25966806	ASXL2|NM_018263_exon_0_0_chr2_25962253_r_19_2876014	+
chr2	26100489	26100539	ASXL2|NM_018263_exon_11_0_chr2_26101035_r_1_2876034	+
chr2	25972933	25972983	ASXL2|NM_018263_exon_1_0_chr2_25972565_r_2_2876021	+
chr2	25994166	25994216	ASXL2|NM_018263_exon_7_0_chr2_25994309_r_0_2741556	+
chr2	26029316	26029366	ASXL2|NM_018263_exon_9_0_chr2_26029098_r_0_2741558	-
chr2	26100960	26101010	ASXL2|NM_018263_exon_11_0_chr2_26101035_r_3_2876037	+
chr2	25979092	25979142	ASXL2|NM_018263_exon_3_0_chr2_25978887_r_0_2741552	-
chr2	25963048	25963098	ASXL2|NM_018263_exon_0_0_chr2_25962253_r_2_2875985	-
chr2	25966428	25966478	ASXL2|NM_018263_exon_0_0_chr2_25962253_r_16_2876009	-
chr2	25962875	25962925	ASXL2|NM_018263_exon_0_0_chr2_25962253_r_3_2875987	+
chr2	25964573	25964623	ASXL2|NM_018263_exon_0_0_chr2_25962253_r_10_2875999	+
chr2	25990314	25990364	ASXL2|NM_018263_exon_5_0_chr2_25990452_r_0_2741554	+
chr2	25965712	25965762	ASXL2|NM_018263_exon_0_0_chr2_25962253_r_13_2876004	-
chr2	25978735	25978785	ASXL2|NM_018263_exon_3_0_chr2_25978887_r_0_2741552	+
chr2	25964741	25964791	ASXL2|NM_018263_exon_0_0_chr2_25962253_r_9_2875997	-
chr2	26100898	26100948	ASXL2|NM_018263_exon_11_0_chr2_26101035_r_1_2876034	-
chr2	25964025	25964075	ASXL2|NM_018263_exon_0_0_chr2_25962253_r_6_2875992	-
chr2	25972678	25972728	ASXL2|NM_018263_exon_1_0_chr2_25972565_r_1_2876019	+
chr2	25965477	25965527	ASXL2|NM_018263_exon_0_0_chr2_25962253_r_12_2876002	-
chr2	26100661	26100711	ASXL2|NM_018263_exon_11_0_chr2_26101035_r_0_2741560	-
chr2	25973111	25973161	ASXL2|NM_018263_exon_1_0_chr2_25972565_r_1_2876019	-
chr2	25966184	25966234	ASXL2|NM_018263_exon_0_0_chr2_25962253_r_15_2876008	-
chr2	25962631	25962681	ASXL2|NM_018263_exon_0_0_chr2_25962253_r_2_2875985	+
chr2	25972448	25972498	ASXL2|NM_018263_exon_1_0_chr2_25972565_r_0_2741548	+
chr2	26101363	26101413	ASXL2|NM_018263_exon_11_0_chr2_26101035_r_3_2876037	-
chr2	25964489	25964539	ASXL2|NM_018263_exon_0_0_chr2_25962253_r_8_2875995	-
chr2	25967397	25967447	ASXL2|NM_018263_exon_0_0_chr2_25962253_r_20_2876016	-
chr2	25963757	25963807	ASXL2|NM_018263_exon_0_0_chr2_25962253_r_5_2875990	-
chr2	25990690	25990740	ASXL2|NM_018263_exon_5_0_chr2_25990452_r_0_2741554	-
chr2	25962383	25962433	ASXL2|NM_018263_exon_0_0_chr2_25962253_r_1_2875983	+
chr2	25966503	25966553	ASXL2|NM_018263_exon_0_0_chr2_25962253_r_18_2876012	+
chr2	25976595	25976645	ASXL2|NM_018263_exon_2_0_chr2_25976403_r_0_2741551	-
chr2	25991842	25991892	ASXL2|NM_018263_exon_6_0_chr2_25991611_r_0_2741555	-
chr2	25966912	25966962	ASXL2|NM_018263_exon_0_0_chr2_25962253_r_18_2876012	-
chr2	25963607	25963657	ASXL2|NM_018263_exon_0_0_chr2_25962253_r_6_2875992	+
chr2	25994506	25994556	ASXL2|NM_018263_exon_7_0_chr2_25994309_r_0_2741556	-
chr2	25976228	25976278	ASXL2|NM_018263_exon_2_0_chr2_25976403_r_0_2741551	+
chr2	25965218	25965268	ASXL2|NM_018263_exon_0_0_chr2_25962253_r_11_2876001	-
chr2	25965945	25965995	ASXL2|NM_018263_exon_0_0_chr2_25962253_r_14_2876006	-
chr2	25964332	25964382	ASXL2|NM_018263_exon_0_0_chr2_25962253_r_9_2875997	+
chr2	26068189	26068239	ASXL2|NM_018263_exon_10_0_chr2_26068350_r_0_2741559	+
chr2	25962557	25962607	ASXL2|NM_018263_exon_0_0_chr2_25962253_r_0_2875981	-
chr2	25962138	25962188	ASXL2|NM_018263_exon_0_0_chr2_25962253_r_0_2875981	+
chr2	25964990	25965040	ASXL2|NM_018263_exon_0_0_chr2_25962253_r_10_2875999	-
chr2	25965056	25965106	ASXL2|NM_018263_exon_0_0_chr2_25962253_r_12_2876002	+
chr2	25963837	25963887	ASXL2|NM_018263_exon_0_0_chr2_25962253_r_7_2875994	+
chr2	25963098	25963148	ASXL2|NM_018263_exon_0_0_chr2_25962253_r_4_2875988	+
chr2	25963537	25963587	ASXL2|NM_018263_exon_0_0_chr2_25962253_r_4_2875988	-
chr2	25964797	25964847	ASXL2|NM_018263_exon_0_0_chr2_25962253_r_11_2876001	+
chr2	25966260	25966310	ASXL2|NM_018263_exon_0_0_chr2_25962253_r_17_2876010	+
chr2	25962808	25962858	ASXL2|NM_018263_exon_0_0_chr2_25962253_r_1_2875983	-
chr2	25964245	25964295	ASXL2|NM_018263_exon_0_0_chr2_25962253_r_7_2875994	-
chr2	26022484	26022534	ASXL2|NM_018263_exon_8_0_chr2_26022254_r_0_2741557	-
chr2	25972855	25972905	ASXL2|NM_018263_exon_1_0_chr2_25972565_r_0_2741548	-
chr2	26100716	26100766	ASXL2|NM_018263_exon_11_0_chr2_26101035_r_2_2876035	+
chr2	26100252	26100302	ASXL2|NM_018263_exon_11_0_chr2_26101035_r_0_2741560	+
chr2	26028961	26029011	ASXL2|NM_018263_exon_9_0_chr2_26029098_r_0_2741558	+
chr2	25966670	25966720	ASXL2|NM_018263_exon_0_0_chr2_25962253_r_17_2876010	-
chr2	25966018	25966068	ASXL2|NM_018263_exon_0_0_chr2_25962253_r_16_2876009	+
chr2	25965305	25965355	ASXL2|NM_018263_exon_0_0_chr2_25962253_r_13_2876004	+
chr2	26068532	26068582	ASXL2|NM_018263_exon_10_0_chr2_26068350_r_0_2741559	-
chr2	25965790	25965840	ASXL2|NM_018263_exon_0_0_chr2_25962253_r_15_2876008	+
chr2	26022203	26022253	ASXL2|NM_018263_exon_8_0_chr2_26022254_r_0_2741557	+
chr2	60685125	60685175	BCL11A|NM_018014_exon_1_0_chr2_60687817_r_2_2742670	-
chr2	60684459	60684509	BCL11A|NM_018014_exon_1_0_chr2_60687817_r_1_2742669	+
chr2	60687467	60687517	BCL11A|NM_018014_exon_1_0_chr2_60687817_r_13_2877507	+
chr2	60684632	60684682	BCL11A|NM_018014_exon_1_0_chr2_60687817_r_0_2742668	-
chr2	60684968	60685018	BCL11A|NM_018014_exon_1_0_chr2_60687817_r_3_2742671	+
chr2	60686372	60686422	BCL11A|NM_018014_exon_1_0_chr2_60687817_r_7_2877498	-
chr2	60689195	60689245	BCL11A|NM_018014_exon_1_0_chr2_60687817_r_20_2877517	+
chr2	60688380	60688430	BCL11A|NM_018014_exon_1_0_chr2_60687817_r_15_2877510	-
chr2	60687410	60687460	BCL11A|NM_018014_exon_1_0_chr2_60687817_r_11_2877504	-
chr2	60780355	60780405	BCL11A|NM_018014_exon_4_0_chr2_60780351_r_1_2877528	+
chr2	60685622	60685672	BCL11A|NM_018014_exon_1_0_chr2_60687817_r_4_2742672	-
chr2	60686709	60686759	BCL11A|NM_018014_exon_1_0_chr2_60687817_r_10_2877502	+
chr2	60688700	60688750	BCL11A|NM_018014_exon_1_0_chr2_60687817_r_18_2877514	+
chr2	60773510	60773560	BCL11A|NM_018014_exon_3_0_chr2_60773106_r_1_2742691	-
chr2	60679849	60679899	BCL11A|NM_018014_exon_0_0_chr2_60678302_r_5_2877491	-
chr2	60687138	60687188	BCL11A|NM_018014_exon_1_0_chr2_60687817_r_10_2877502	-
chr2	60678611	60678661	BCL11A|NM_018014_exon_0_0_chr2_60678302_r_0_2877483	-
chr2	60686136	60686186	BCL11A|NM_018014_exon_1_0_chr2_60687817_r_6_2877496	-
chr2	60678941	60678991	BCL11A|NM_018014_exon_0_0_chr2_60678302_r_3_2877488	+
chr2	60679609	60679659	BCL11A|NM_018014_exon_0_0_chr2_60678302_r_4_2877489	-
chr2	60688203	60688253	BCL11A|NM_018014_exon_1_0_chr2_60687817_r_16_2877511	+
chr2	60688957	60689007	BCL11A|NM_018014_exon_1_0_chr2_60687817_r_19_2877516	+
chr2	60689381	60689431	BCL11A|NM_018014_exon_1_0_chr2_60687817_r_19_2877516	-
chr2	60686210	60686260	BCL11A|NM_018014_exon_1_0_chr2_60687817_r_8_2877499	+
chr2	60684883	60684933	BCL11A|NM_018014_exon_1_0_chr2_60687817_r_1_2742669	-
chr2	60695710	60695760	BCL11A|NM_018014_exon_2_0_chr2_60695867_r_0_2742689	+
chr2	60685201	60685251	BCL11A|NM_018014_exon_1_0_chr2_60687817_r_4_2742672	+
chr2	60686622	60686672	BCL11A|NM_018014_exon_1_0_chr2_60687817_r_8_2877499	-
chr2	60772977	60773027	BCL11A|NM_018014_exon_3_0_chr2_60773106_r_0_2742690	+
chr2	60685473	60685523	BCL11A|NM_018014_exon_1_0_chr2_60687817_r_5_2877495	+
chr2	60696055	60696105	BCL11A|NM_018014_exon_2_0_chr2_60695867_r_0_2742689	-
chr2	60685872	60685922	BCL11A|NM_018014_exon_1_0_chr2_60687817_r_5_2877495	-
chr2	60687709	60687759	BCL11A|NM_018014_exon_1_0_chr2_60687817_r_14_2877508	+
chr2	60686879	60686929	BCL11A|NM_018014_exon_1_0_chr2_60687817_r_9_2877501	-
chr2	60678854	60678904	BCL11A|NM_018014_exon_0_0_chr2_60678302_r_1_2877485	-
chr2	60679109	60679159	BCL11A|NM_018014_exon_0_0_chr2_60678302_r_2_2877486	-
chr2	60686462	60686512	BCL11A|NM_018014_exon_1_0_chr2_60687817_r_9_2877501	+
chr2	60679450	60679500	BCL11A|NM_018014_exon_0_0_chr2_60678302_r_5_2877491	+
chr2	60688884	60688934	BCL11A|NM_018014_exon_1_0_chr2_60687817_r_17_2877513	-
chr2	60688133	60688183	BCL11A|NM_018014_exon_1_0_chr2_60687817_r_14_2877508	-
chr2	60780225	60780275	BCL11A|NM_018014_exon_4_0_chr2_60780351_r_0_2877526	+
chr2	60773146	60773196	BCL11A|NM_018014_exon_3_0_chr2_60773106_r_1_2742691	+
chr2	60689632	60689682	BCL11A|NM_018014_exon_1_0_chr2_60687817_r_20_2877517	-
chr2	60685923	60685973	BCL11A|NM_018014_exon_1_0_chr2_60687817_r_7_2877498	+
chr2	60684723	60684773	BCL11A|NM_018014_exon_1_0_chr2_60687817_r_2_2742670	+
chr2	60687217	60687267	BCL11A|NM_018014_exon_1_0_chr2_60687817_r_12_2877505	+
chr2	60687871	60687921	BCL11A|NM_018014_exon_1_0_chr2_60687817_r_13_2877507	-
chr2	60780726	60780776	BCL11A|NM_018014_exon_4_0_chr2_60780351_r_1_2877528	-
chr2	60686955	60687005	BCL11A|NM_018014_exon_1_0_chr2_60687817_r_11_2877504	+
chr2	60685701	60685751	BCL11A|NM_018014_exon_1_0_chr2_60687817_r_6_2877496	+
chr2	60685416	60685466	BCL11A|NM_018014_exon_1_0_chr2_60687817_r_3_2742671	-
chr2	60684216	60684266	BCL11A|NM_018014_exon_1_0_chr2_60687817_r_0_2742668	+
chr2	60773357	60773407	BCL11A|NM_018014_exon_3_0_chr2_60773106_r_0_2742690	-
chr2	60687959	60688009	BCL11A|NM_018014_exon_1_0_chr2_60687817_r_15_2877510	+
chr2	60688611	60688661	BCL11A|NM_018014_exon_1_0_chr2_60687817_r_16_2877511	-
chr2	60678439	60678489	BCL11A|NM_018014_exon_0_0_chr2_60678302_r_1_2877485	+
chr2	60687632	60687682	BCL11A|NM_018014_exon_1_0_chr2_60687817_r_12_2877505	-
chr2	60688459	60688509	BCL11A|NM_018014_exon_1_0_chr2_60687817_r_17_2877513	+
chr2	60780506	60780556	BCL11A|NM_018014_exon_4_0_chr2_60780351_r_0_2877526	-
chr2	60679373	60679423	BCL11A|NM_018014_exon_0_0_chr2_60678302_r_3_2877488	-
chr2	60678695	60678745	BCL11A|NM_018014_exon_0_0_chr2_60678302_r_2_2877486	+
chr2	60689123	60689173	BCL11A|NM_018014_exon_1_0_chr2_60687817_r_18_2877514	-
chr2	60679203	60679253	BCL11A|NM_018014_exon_0_0_chr2_60678302_r_4_2877489	+
chr14	99642594	99642644	BCL11B|NM_022898_exon_0_0_chr14_99635625_r_27_2853656	-
chr14	99640630	99640680	BCL11B|NM_022898_exon_0_0_chr14_99635625_r_19_2853648	-
chr14	99724080	99724130	BCL11B|NM_022898_exon_1_0_chr14_99723808_r_0_2853657	-
chr14	99637425	99637475	BCL11B|NM_022898_exon_0_0_chr14_99635625_r_6_2853635	-
chr14	99637179	99637229	BCL11B|NM_022898_exon_0_0_chr14_99635625_r_5_2853634	-
chr14	99724249	99724299	BCL11B|NM_022898_exon_1_0_chr14_99723808_r_1_2853658	-
chr14	99637494	99637544	BCL11B|NM_022898_exon_0_0_chr14_99635625_r_8_2853637	+
chr14	99737915	99737965	BCL11B|NM_022898_exon_2_0_chr14_99737498_r_1_2853663	-
chr14	99642338	99642388	BCL11B|NM_022898_exon_0_0_chr14_99635625_r_26_2853655	-
chr14	99636682	99636732	BCL11B|NM_022898_exon_0_0_chr14_99635625_r_3_2853632	-
chr14	99638486	99638536	BCL11B|NM_022898_exon_0_0_chr14_99635625_r_12_2853641	+
chr14	99641159	99641209	BCL11B|NM_022898_exon_0_0_chr14_99635625_r_23_2853652	+
chr14	99637246	99637296	BCL11B|NM_022898_exon_0_0_chr14_99635625_r_7_2853636	+
chr14	99640868	99640918	BCL11B|NM_022898_exon_0_0_chr14_99635625_r_20_2853649	-
chr14	99639710	99639760	BCL11B|NM_022898_exon_0_0_chr14_99635625_r_17_2853646	+
chr14	99638978	99639028	BCL11B|NM_022898_exon_0_0_chr14_99635625_r_14_2853643	+
chr14	99640933	99640983	BCL11B|NM_022898_exon_0_0_chr14_99635625_r_22_2853651	+
chr14	99638646	99638696	BCL11B|NM_022898_exon_0_0_chr14_99635625_r_11_2853640	-
chr14	99638144	99638194	BCL11B|NM_022898_exon_0_0_chr14_99635625_r_9_2853638	-
chr14	99737357	99737407	BCL11B|NM_022898_exon_2_0_chr14_99737498_r_0_2853662	+
chr14	99641681	99641731	BCL11B|NM_022898_exon_0_0_chr14_99635625_r_25_2853654	+
chr14	99638408	99638458	BCL11B|NM_022898_exon_0_0_chr14_99635625_r_10_2853639	-
chr14	99635998	99636048	BCL11B|NM_022898_exon_0_0_chr14_99635625_r_2_2853631	+
chr14	99637717	99637767	BCL11B|NM_022898_exon_0_0_chr14_99635625_r_9_2853638	+
chr14	99639388	99639438	BCL11B|NM_022898_exon_0_0_chr14_99635625_r_14_2853643	-
chr14	99636182	99636232	BCL11B|NM_022898_exon_0_0_chr14_99635625_r_1_2853630	-
chr14	99638880	99638930	BCL11B|NM_022898_exon_0_0_chr14_99635625_r_12_2853641	-
chr14	99642163	99642213	BCL11B|NM_022898_exon_0_0_chr14_99635625_r_27_2853656	+
chr14	99639458	99639508	BCL11B|NM_022898_exon_0_0_chr14_99635625_r_16_2853645	+
chr14	99639952	99640002	BCL11B|NM_022898_exon_0_0_chr14_99635625_r_18_2853647	+
chr14	99641860	99641910	BCL11B|NM_022898_exon_0_0_chr14_99635625_r_24_2853653	-
chr14	99639212	99639262	BCL11B|NM_022898_exon_0_0_chr14_99635625_r_15_2853644	+
chr14	99636510	99636560	BCL11B|NM_022898_exon_0_0_chr14_99635625_r_4_2853633	+
chr14	99641107	99641157	BCL11B|NM_022898_exon_0_0_chr14_99635625_r_21_2853650	-
chr14	99640682	99640732	BCL11B|NM_022898_exon_0_0_chr14_99635625_r_21_2853650	+
chr14	99737517	99737567	BCL11B|NM_022898_exon_2_0_chr14_99737498_r_1_2853663	+
chr14	99640412	99640462	BCL11B|NM_022898_exon_0_0_chr14_99635625_r_20_2853649	+
chr14	99723672	99723722	BCL11B|NM_022898_exon_1_0_chr14_99723808_r_0_2853657	+
chr14	99636753	99636803	BCL11B|NM_022898_exon_0_0_chr14_99635625_r_5_2853634	+
chr14	99637904	99637954	BCL11B|NM_022898_exon_0_0_chr14_99635625_r_8_2853637	-
chr14	99635747	99635797	BCL11B|NM_022898_exon_0_0_chr14_99635625_r_1_2853630	+
chr14	99639133	99639183	BCL11B|NM_022898_exon_0_0_chr14_99635625_r_13_2853642	-
chr14	99641358	99641408	BCL11B|NM_022898_exon_0_0_chr14_99635625_r_22_2853651	-
chr14	99641597	99641647	BCL11B|NM_022898_exon_0_0_chr14_99635625_r_23_2853652	-
chr14	99642114	99642164	BCL11B|NM_022898_exon_0_0_chr14_99635625_r_25_2853654	-
chr14	99639634	99639684	BCL11B|NM_022898_exon_0_0_chr14_99635625_r_15_2853644	-
chr14	99697976	99698026	BCL11B|NM_138576_exon_1_0_chr14_99697682_r_0_2702165	-
chr14	99638219	99638269	BCL11B|NM_022898_exon_0_0_chr14_99635625_r_11_2853640	+
chr14	99723870	99723920	BCL11B|NM_022898_exon_1_0_chr14_99723808_r_1_2853658	+
chr14	99637682	99637732	BCL11B|NM_022898_exon_0_0_chr14_99635625_r_7_2853636	-
chr14	99640370	99640420	BCL11B|NM_022898_exon_0_0_chr14_99635625_r_18_2853647	-
chr14	99636987	99637037	BCL11B|NM_022898_exon_0_0_chr14_99635625_r_6_2853635	+
chr14	99635511	99635561	BCL11B|NM_022898_exon_0_0_chr14_99635625_r_0_2853629	+
chr14	99636261	99636311	BCL11B|NM_022898_exon_0_0_chr14_99635625_r_3_2853632	+
chr14	99697555	99697605	BCL11B|NM_138576_exon_1_0_chr14_99697682_r_0_2702165	+
chr14	99635924	99635974	BCL11B|NM_022898_exon_0_0_chr14_99635625_r_0_2853629	-
chr14	99637986	99638036	BCL11B|NM_022898_exon_0_0_chr14_99635625_r_10_2853639	+
chr14	99640199	99640249	BCL11B|NM_022898_exon_0_0_chr14_99635625_r_19_2853648	+
chr14	99640138	99640188	BCL11B|NM_022898_exon_0_0_chr14_99635625_r_17_2853646	-
chr14	99641928	99641978	BCL11B|NM_022898_exon_0_0_chr14_99635625_r_26_2853655	+
chr14	99636433	99636483	BCL11B|NM_022898_exon_0_0_chr14_99635625_r_2_2853631	-
chr14	99638694	99638744	BCL11B|NM_022898_exon_0_0_chr14_99635625_r_13_2853642	+
chr14	99639819	99639869	BCL11B|NM_022898_exon_0_0_chr14_99635625_r_16_2853645	-
chr14	99641501	99641551	BCL11B|NM_022898_exon_0_0_chr14_99635625_r_24_2853653	+
chr6	136581419	136581469	BCLAF1|NM_001077440_exon_0_0_chr6_136578001_r_15_2902585	+
chr6	136580238	136580288	BCLAF1|NM_001077440_exon_0_0_chr6_136578001_r_10_2902580	+
chr6	136581184	136581234	BCLAF1|NM_001077440_exon_0_0_chr6_136578001_r_14_2902584	+
chr6	136612078	136612128	BCLAF1|NM_001077440_exon_11_0_chr6_136610851_r_6_2902591	-
chr6	136593322	136593372	BCLAF1|NM_001077440_exon_4_0_chr6_136593133_r_0_2771758	-
chr6	136590839	136590889	BCLAF1|NM_001077440_exon_3_0_chr6_136590575_r_0_2771757	-
chr6	136589176	136589226	BCLAF1|NM_001077440_exon_2_0_chr6_136589300_r_0_2771756	+
chr6	136594412	136594462	BCLAF1|NM_001077440_exon_5_0_chr6_136594220_r_0_2771759	-
chr6	136581629	136581679	BCLAF1|NM_001077440_exon_0_0_chr6_136578001_r_16_2902586	+
chr6	136610251	136610301	BCLAF1|NM_001077440_exon_11_0_chr6_136610851_r_0_2771770	+
chr6	136579013	136579063	BCLAF1|NM_001077440_exon_0_0_chr6_136578001_r_3_2902573	-
chr6	136581601	136581651	BCLAF1|NM_001077440_exon_0_0_chr6_136578001_r_14_2902584	-
chr6	136603920	136603970	BCLAF1|NM_001077440_exon_10_0_chr6_136603722_r_0_2771769	-
chr6	136611833	136611883	BCLAF1|NM_001077440_exon_11_0_chr6_136610851_r_5_2902590	-
chr6	136601113	136601163	BCLAF1|NM_001077440_exon_9_0_chr6_136600901_r_0_2771768	-
chr6	136582691	136582741	BCLAF1|NM_001077440_exon_1_0_chr6_136582403_r_0_2771754	-
chr6	136578595	136578645	BCLAF1|NM_001077440_exon_0_0_chr6_136578001_r_3_2902573	+
chr6	136578292	136578342	BCLAF1|NM_001077440_exon_0_0_chr6_136578001_r_0_2771736	-
chr6	136599971	136600021	BCLAF1|NM_001077440_exon_8_0_chr6_136599003_r_3_2771767	-
chr6	136581913	136581963	BCLAF1|NM_001077440_exon_0_0_chr6_136578001_r_17_2902587	+
chr6	136597281	136597331	BCLAF1|NM_001077440_exon_7_0_chr6_136596981_r_0_2771761	-
chr6	136599559	136599609	BCLAF1|NM_001077440_exon_8_0_chr6_136599003_r_3_2771767	+
chr6	136611437	136611487	BCLAF1|NM_001077440_exon_11_0_chr6_136610851_r_5_2902590	+
chr6	136610722	136610772	BCLAF1|NM_001077440_exon_11_0_chr6_136610851_r_2_2771772	+
chr6	136580909	136580959	BCLAF1|NM_001077440_exon_0_0_chr6_136578001_r_11_2902581	-
chr6	136581836	136581886	BCLAF1|NM_001077440_exon_0_0_chr6_136578001_r_15_2902585	-
chr6	136580962	136581012	BCLAF1|NM_001077440_exon_0_0_chr6_136578001_r_13_2902583	+
chr6	136579072	136579122	BCLAF1|NM_001077440_exon_0_0_chr6_136578001_r_5_2902575	+
chr6	136611132	136611182	BCLAF1|NM_001077440_exon_11_0_chr6_136610851_r_2_2771772	-
chr6	136590454	136590504	BCLAF1|NM_001077440_exon_3_0_chr6_136590575_r_0_2771757	+
chr6	136579962	136580012	BCLAF1|NM_001077440_exon_0_0_chr6_136578001_r_7_2902577	-
chr6	136580484	136580534	BCLAF1|NM_001077440_exon_0_0_chr6_136578001_r_11_2902581	+
chr6	136597074	136597124	BCLAF1|NM_001077440_exon_7_0_chr6_136596981_r_1_2771762	+
chr6	136611199	136611249	BCLAF1|NM_001077440_exon_11_0_chr6_136610851_r_4_2902589	+
chr6	136578351	136578401	BCLAF1|NM_001077440_exon_0_0_chr6_136578001_r_2_2902572	+
chr6	136582093	136582143	BCLAF1|NM_001077440_exon_0_0_chr6_136578001_r_16_2902586	-
chr6	136579297	136579347	BCLAF1|NM_001077440_exon_0_0_chr6_136578001_r_6_2902576	+
chr6	136580005	136580055	BCLAF1|NM_001077440_exon_0_0_chr6_136578001_r_9_2902579	+
chr6	136611675	136611725	BCLAF1|NM_001077440_exon_11_0_chr6_136610851_r_6_2902591	+
chr6	136589550	136589600	BCLAF1|NM_001077440_exon_2_0_chr6_136589300_r_0_2771756	-
chr6	136598891	136598941	BCLAF1|NM_001077440_exon_8_0_chr6_136599003_r_0_2771764	+
chr6	136577874	136577924	BCLAF1|NM_001077440_exon_0_0_chr6_136578001_r_0_2771736	+
chr6	136582271	136582321	BCLAF1|NM_001077440_exon_1_0_chr6_136582403_r_0_2771754	+
chr6	136580429	136580479	BCLAF1|NM_001077440_exon_0_0_chr6_136578001_r_9_2902579	-
chr6	136611615	136611665	BCLAF1|NM_001077440_exon_11_0_chr6_136610851_r_4_2902589	-
chr6	136596550	136596600	BCLAF1|NM_001077440_exon_6_0_chr6_136596670_r_0_2771760	+
chr6	136581382	136581432	BCLAF1|NM_001077440_exon_0_0_chr6_136578001_r_13_2902583	-
chr6	136579244	136579294	BCLAF1|NM_001077440_exon_0_0_chr6_136578001_r_4_2902574	-
chr6	136596874	136596924	BCLAF1|NM_001077440_exon_7_0_chr6_136596981_r_0_2771761	+
chr6	136578773	136578823	BCLAF1|NM_001077440_exon_0_0_chr6_136578001_r_2_2902572	-
chr6	136579777	136579827	BCLAF1|NM_001077440_exon_0_0_chr6_136578001_r_8_2902578	+
chr6	136610500	136610550	BCLAF1|NM_001077440_exon_11_0_chr6_136610851_r_1_2771771	+
chr6	136599283	136599333	BCLAF1|NM_001077440_exon_8_0_chr6_136599003_r_0_2771764	-
chr6	136599334	136599384	BCLAF1|NM_001077440_exon_8_0_chr6_136599003_r_2_2771766	+
chr6	136580709	136580759	BCLAF1|NM_001077440_exon_0_0_chr6_136578001_r_12_2902582	+
chr6	136596918	136596968	BCLAF1|NM_001077440_exon_6_0_chr6_136596670_r_0_2771760	-
chr6	136592972	136593022	BCLAF1|NM_001077440_exon_4_0_chr6_136593133_r_0_2771758	+
chr6	136599511	136599561	BCLAF1|NM_001077440_exon_8_0_chr6_136599003_r_1_2771765	-
chr6	136578135	136578185	BCLAF1|NM_001077440_exon_0_0_chr6_136578001_r_1_2902571	+
chr6	136579709	136579759	BCLAF1|NM_001077440_exon_0_0_chr6_136578001_r_6_2902576	-
chr6	136578820	136578870	BCLAF1|NM_001077440_exon_0_0_chr6_136578001_r_4_2902574	+
chr6	136597295	136597345	BCLAF1|NM_001077440_exon_7_0_chr6_136596981_r_2_2771763	+
chr6	136603563	136603613	BCLAF1|NM_001077440_exon_10_0_chr6_136603722_r_0_2771769	+
chr6	136599748	136599798	BCLAF1|NM_001077440_exon_8_0_chr6_136599003_r_2_2771766	-
chr6	136588387	136588437	BCLAF1|NM_001077441_exon_2_0_chr6_136588167_r_0_2771755	-
chr6	136588040	136588090	BCLAF1|NM_001077441_exon_2_0_chr6_136588167_r_0_2771755	+
chr6	136610663	136610713	BCLAF1|NM_001077440_exon_11_0_chr6_136610851_r_0_2771770	-
chr6	136599123	136599173	BCLAF1|NM_001077440_exon_8_0_chr6_136599003_r_1_2771765	+
chr6	136581143	136581193	BCLAF1|NM_001077440_exon_0_0_chr6_136578001_r_12_2902582	-
chr6	136597496	136597546	BCLAF1|NM_001077440_exon_7_0_chr6_136596981_r_1_2771762	-
chr6	136580201	136580251	BCLAF1|NM_001077440_exon_0_0_chr6_136578001_r_8_2902578	-
chr6	136582313	136582363	BCLAF1|NM_001077440_exon_0_0_chr6_136578001_r_17_2902587	-
chr6	136611364	136611414	BCLAF1|NM_001077440_exon_11_0_chr6_136610851_r_3_2902588	-
chr6	136578537	136578587	BCLAF1|NM_001077440_exon_0_0_chr6_136578001_r_1_2902571	-
chr6	136580661	136580711	BCLAF1|NM_001077440_exon_0_0_chr6_136578001_r_10_2902580	-
chr6	136594079	136594129	BCLAF1|NM_001077440_exon_5_0_chr6_136594220_r_0_2771759	+
chr6	136610974	136611024	BCLAF1|NM_001077440_exon_11_0_chr6_136610851_r_3_2902588	+
chr6	136610903	136610953	BCLAF1|NM_001077440_exon_11_0_chr6_136610851_r_1_2771771	-
chr6	136597713	136597763	BCLAF1|NM_001077440_exon_7_0_chr6_136596981_r_2_2771763	-
chr6	136579473	136579523	BCLAF1|NM_001077440_exon_0_0_chr6_136578001_r_5_2902575	-
chr6	136579600	136579650	BCLAF1|NM_001077440_exon_0_0_chr6_136578001_r_7_2902577	+
chr7	140494352	140494402	BRAF|NM_004333_exon_10_0_chr7_140494108_r_0_2777210	-
chr7	140624357	140624407	BRAF|NM_004333_exon_17_0_chr7_140624366_r_3_2905887	+
chr7	140483047	140483097	BRAF|NM_004333_exon_8_0_chr7_140482821_r_0_2777208	-
chr7	140439472	140439522	BRAF|NM_004333_exon_1_0_chr7_140439612_r_0_2777201	+
chr7	140481220	140481270	BRAF|NM_004333_exon_7_0_chr7_140481376_r_0_2777207	+
chr7	140507601	140507651	BRAF|NM_004333_exon_13_0_chr7_140507760_r_0_2777213	+
chr7	140477964	140478014	BRAF|NM_004333_exon_6_0_chr7_140477791_r_0_2777206	-
chr7	140508555	140508605	BRAF|NM_004333_exon_14_0_chr7_140508692_r_0_2777214	+
chr7	140453832	140453882	BRAF|NM_004333_exon_4_0_chr7_140453987_r_0_2777204	+
chr7	140452933	140452983	BRAF|NM_004333_exon_3_0_chr7_140453075_r_0_2777203	+
chr7	140493976	140494026	BRAF|NM_004333_exon_10_0_chr7_140494108_r_0_2777210	+
chr7	140481575	140481625	BRAF|NM_004333_exon_7_0_chr7_140481376_r_0_2777207	-
chr7	140434069	140434119	BRAF|NM_004333_exon_0_0_chr7_140433813_r_0_2905880	-
chr7	140534751	140534801	BRAF|NM_004333_exon_15_0_chr7_140534409_r_1_2777216	-
chr7	140487488	140487538	BRAF|NM_004333_exon_9_0_chr7_140487348_r_0_2777209	-
chr7	140439878	140439928	BRAF|NM_004333_exon_1_0_chr7_140439612_r_0_2777201	-
chr7	140624170	140624220	BRAF|NM_004333_exon_17_0_chr7_140624366_r_2_2905886	+
chr7	140434643	140434693	BRAF|NM_004333_exon_0_0_chr7_140433813_r_3_2905883	-
chr7	140482690	140482740	BRAF|NM_004333_exon_8_0_chr7_140482821_r_0_2777208	+
chr7	140477635	140477685	BRAF|NM_004333_exon_6_0_chr7_140477791_r_0_2777206	+
chr7	140549773	140549823	BRAF|NM_004333_exon_16_0_chr7_140549911_r_0_2777217	+
chr7	140433688	140433738	BRAF|NM_004333_exon_0_0_chr7_140433813_r_0_2905880	+
chr7	140476571	140476621	BRAF|NM_004333_exon_5_0_chr7_140476712_r_0_2777205	+
chr7	140487175	140487225	BRAF|NM_004333_exon_9_0_chr7_140487348_r_0_2777209	+
chr7	140434245	140434295	BRAF|NM_004333_exon_0_0_chr7_140433813_r_3_2905883	+
chr7	140434293	140434343	BRAF|NM_004333_exon_0_0_chr7_140433813_r_1_2905881	-
chr7	140534628	140534678	BRAF|NM_004333_exon_15_0_chr7_140534409_r_0_2777215	-
chr7	140449307	140449357	BRAF|NM_004333_exon_2_0_chr7_140449087_r_0_2777202	-
chr7	140434055	140434105	BRAF|NM_004333_exon_0_0_chr7_140433813_r_2_2905882	+
chr7	140625237	140625287	BRAF|NM_004333_exon_17_0_chr7_140624366_r_5_2905889	-
chr7	140625040	140625090	BRAF|NM_004333_exon_17_0_chr7_140624366_r_6_2905890	+
chr7	140624816	140624866	BRAF|NM_004333_exon_17_0_chr7_140624366_r_5_2905889	+
chr7	140534405	140534455	BRAF|NM_004333_exon_15_0_chr7_140534409_r_1_2777216	+
chr7	140508905	140508955	BRAF|NM_004333_exon_14_0_chr7_140508692_r_0_2777214	-
chr7	140434454	140434504	BRAF|NM_004333_exon_0_0_chr7_140433813_r_2_2905882	-
chr7	140500014	140500064	BRAF|NM_004333_exon_11_0_chr7_140500162_r_0_2777211	+
chr7	140448936	140448986	BRAF|NM_004333_exon_2_0_chr7_140449087_r_0_2777202	+
chr7	140501087	140501137	BRAF|NM_004333_exon_12_0_chr7_140501212_r_0_2777212	+
chr7	140500366	140500416	BRAF|NM_004333_exon_11_0_chr7_140500162_r_0_2777211	-
chr7	140507971	140508021	BRAF|NM_004333_exon_13_0_chr7_140507760_r_0_2777213	-
chr7	140454147	140454197	BRAF|NM_004333_exon_4_0_chr7_140453987_r_0_2777204	-
chr7	140550123	140550173	BRAF|NM_004333_exon_16_0_chr7_140549911_r_0_2777217	-
chr7	140625451	140625501	BRAF|NM_004333_exon_17_0_chr7_140624366_r_6_2905890	-
chr7	140625014	140625064	BRAF|NM_004333_exon_17_0_chr7_140624366_r_4_2905888	-
chr7	140624130	140624180	BRAF|NM_004333_exon_17_0_chr7_140624366_r_0_2905884	-
chr7	140433839	140433889	BRAF|NM_004333_exon_0_0_chr7_140433813_r_1_2905881	+
chr7	140534275	140534325	BRAF|NM_004333_exon_15_0_chr7_140534409_r_0_2777215	+
chr7	140453297	140453347	BRAF|NM_004333_exon_3_0_chr7_140453075_r_0_2777203	-
chr7	140501459	140501509	BRAF|NM_004333_exon_12_0_chr7_140501212_r_0_2777212	-
chr7	140476883	140476933	BRAF|NM_004333_exon_5_0_chr7_140476712_r_0_2777205	-
chr7	140624779	140624829	BRAF|NM_004333_exon_17_0_chr7_140624366_r_3_2905887	-
chr7	140623717	140623767	BRAF|NM_004333_exon_17_0_chr7_140624366_r_0_2905884	+
chr7	140623952	140624002	BRAF|NM_004333_exon_17_0_chr7_140624366_r_1_2905885	+
chr7	140624352	140624402	BRAF|NM_004333_exon_17_0_chr7_140624366_r_1_2905885	-
chr7	140624491	140624541	BRAF|NM_004333_exon_17_0_chr7_140624366_r_2_2905886	-
chr10	98741643	98741693	C10ORF12|_3_2843270	+
chr10	98743254	98743304	C10ORF12|_8_2843280	-
chr10	98744506	98744556	C10ORF12|_15_2843294	+
chr10	98742541	98742591	C10ORF12|_5_2843274	-
chr10	98745398	98745448	C10ORF12|_17_2843298	-
chr10	98743010	98743060	C10ORF12|_7_2843278	-
chr10	98744921	98744971	C10ORF12|_15_2843294	-
chr10	98744227	98744277	C10ORF12|_12_2843288	-
chr10	98745184	98745234	C10ORF12|_16_2843296	-
chr10	98743748	98743798	C10ORF12|_10_2843284	-
chr10	98744285	98744335	C10ORF12|_14_2843292	+
chr10	98743483	98743533	C10ORF12|_9_2843282	-
chr10	98741818	98741868	C10ORF12|_2_2685975	-
chr10	98742062	98742112	C10ORF12|_3_2843270	-
chr10	98743554	98743604	C10ORF12|_11_2843286	+
chr10	98741570	98741620	C10ORF12|_1_2685973	-
chr10	98742292	98742342	C10ORF12|_4_2843272	-
chr10	98742781	98742831	C10ORF12|_6_2843276	-
chr10	98743080	98743130	C10ORF12|_9_2843282	+
chr10	98744687	98744737	C10ORF12|_14_2843292	-
chr10	98742366	98742416	C10ORF12|_6_2843276	+
chr10	98742849	98742899	C10ORF12|_8_2843280	+
chr10	98742590	98742640	C10ORF12|_7_2843278	+
chr10	98744748	98744798	C10ORF12|_16_2843296	+
chr10	98745238	98745288	C10ORF12|_18_2843300	+
chr10	98744450	98744500	C10ORF12|_13_2843290	-
chr10	98743799	98743849	C10ORF12|_12_2843288	+
chr10	98741893	98741943	C10ORF12|_4_2843272	+
chr10	98741344	98741394	C10ORF12|_0_2685971	-
chr10	98740932	98740982	C10ORF12|_0_2685971	+
chr10	98744985	98745035	C10ORF12|_17_2843298	+
chr10	98741168	98741218	C10ORF12|_1_2685973	+
chr10	98743975	98744025	C10ORF12|_11_2843286	-
chr10	98745639	98745689	C10ORF12|_18_2843300	-
chr10	98743313	98743363	C10ORF12|_10_2843284	+
chr10	98742114	98742164	C10ORF12|_5_2843274	+
chr10	98744042	98744092	C10ORF12|_13_2843290	+
chr10	98741411	98741461	C10ORF12|_2_2685975	+
chr17	36828105	36828155	C17ORF96|_1_2861097	+
chr17	36829501	36829551	C17ORF96|_5_2861103	-
chr17	36830577	36830627	C17ORF96|_11_2861112	+
chr17	36829078	36829128	C17ORF96|_5_2861103	+
chr17	36828337	36828387	C17ORF96|_2_2861099	+
chr17	36827857	36827907	C17ORF96|_0_2712313	+
chr17	36830760	36830810	C17ORF96|_10_2861111	-
chr17	36828255	36828305	C17ORF96|_0_2712313	-
chr17	36829747	36829797	C17ORF96|_6_2861105	-
chr17	36831245	36831295	C17ORF96|_12_2861114	-
chr17	36830003	36830053	C17ORF96|_7_2861106	-
chr17	36828852	36828902	C17ORF96|_4_2861102	+
chr17	36830242	36830292	C17ORF96|_8_2861108	-
chr17	36830998	36831048	C17ORF96|_11_2861112	-
chr17	36829328	36829378	C17ORF96|_6_2861105	+
chr17	36829002	36829052	C17ORF96|_3_2861100	-
chr17	36828530	36828580	C17ORF96|_1_2861097	-
chr17	36829275	36829325	C17ORF96|_4_2861102	-
chr17	36830336	36830386	C17ORF96|_10_2861111	+
chr17	36830829	36830879	C17ORF96|_12_2861114	+
chr17	36829581	36829631	C17ORF96|_7_2861106	+
chr17	36828772	36828822	C17ORF96|_2_2861099	-
chr17	36830506	36830556	C17ORF96|_9_2861109	-
chr17	36828591	36828641	C17ORF96|_3_2861100	+
chr17	36830094	36830144	C17ORF96|_9_2861109	+
chr17	36829841	36829891	C17ORF96|_8_2861108	+
chr9	21975194	21975244	CDKN2A|NM_000077_exon_2_0_chr9_21974677_r_2_2908881	-
chr9	21971134	21971184	CDKN2A|NM_000077_exon_1_0_chr9_21970901_r_0_2908878	-
chr9	21994562	21994612	CDKN2A|NM_058195_exon_2_0_chr9_21994138_r_1_2908888	-
chr9	21974291	21974341	CDKN2A|NM_000077_exon_2_0_chr9_21974677_r_0_2781945	+
chr9	21974958	21975008	CDKN2A|NM_000077_exon_2_0_chr9_21974677_r_1_2908880	-
chr9	21994390	21994440	CDKN2A|NM_058195_exon_2_0_chr9_21994138_r_0_2908887	-
chr9	21993996	21994046	CDKN2A|NM_058195_exon_2_0_chr9_21994138_r_0_2908887	+
chr9	21971302	21971352	CDKN2A|NM_000077_exon_1_0_chr9_21970901_r_1_2908879	-
chr9	21968064	21968114	CDKN2A|NM_000077_exon_0_0_chr9_21967751_r_0_2908876	-
chr9	21968846	21968896	CDKN2A|NM_001195132_exon_1_0_chr9_21968574_r_0_2781942	-
chr9	21967891	21967941	CDKN2A|NM_000077_exon_0_0_chr9_21967751_r_1_2908877	+
chr9	21974539	21974589	CDKN2A|NM_000077_exon_2_0_chr9_21974677_r_1_2908880	+
chr9	21968458	21968508	CDKN2A|NM_001195132_exon_1_0_chr9_21968574_r_0_2781942	+
chr9	21974717	21974767	CDKN2A|NM_000077_exon_2_0_chr9_21974677_r_0_2781945	-
chr9	21970910	21970960	CDKN2A|NM_000077_exon_1_0_chr9_21970901_r_1_2908879	+
chr9	21968304	21968354	CDKN2A|NM_000077_exon_0_0_chr9_21967751_r_1_2908877	-
chr9	21970761	21970811	CDKN2A|NM_000077_exon_1_0_chr9_21970901_r_0_2908878	+
chr9	21974788	21974838	CDKN2A|NM_000077_exon_2_0_chr9_21974677_r_2_2908881	+
chr9	21994182	21994232	CDKN2A|NM_058195_exon_2_0_chr9_21994138_r_1_2908888	+
chr9	22005127	22005177	CDKN2B|NM_004936_exon_0_0_chr9_22002902_r_8_2908900	-
chr9	22008939	22008989	CDKN2B|NM_004936_exon_1_0_chr9_22008797_r_0_2781976	-
chr9	22003032	22003082	CDKN2B|NM_004936_exon_0_0_chr9_22002902_r_1_2908893	+
chr9	22004227	22004277	CDKN2B|NM_004936_exon_0_0_chr9_22002902_r_6_2908898	+
chr9	22006060	22006110	CDKN2B|NM_004936_exon_0_0_chr9_22002902_r_12_2908904	-
chr9	22005666	22005716	CDKN2B|NM_004936_exon_0_0_chr9_22002902_r_12_2908904	+
chr9	22003692	22003742	CDKN2B|NM_004936_exon_0_0_chr9_22002902_r_2_2908894	-
chr9	22004401	22004451	CDKN2B|NM_004936_exon_0_0_chr9_22002902_r_5_2908897	-
chr9	22003231	22003281	CDKN2B|NM_004936_exon_0_0_chr9_22002902_r_2_2908894	+
chr9	22005359	22005409	CDKN2B|NM_004936_exon_0_0_chr9_22002902_r_9_2908901	-
chr9	22005182	22005232	CDKN2B|NM_004936_exon_0_0_chr9_22002902_r_10_2908902	+
chr9	22005604	22005654	CDKN2B|NM_004936_exon_0_0_chr9_22002902_r_10_2908902	-
chr9	22009179	22009229	CDKN2B|NM_004936_exon_1_0_chr9_22008797_r_1_2781977	-
chr9	22004449	22004499	CDKN2B|NM_004936_exon_0_0_chr9_22002902_r_7_2908899	+
chr9	22008549	22008599	CDKN2B|NM_004936_exon_1_0_chr9_22008797_r_0_2781976	+
chr9	22005422	22005472	CDKN2B|NM_004936_exon_0_0_chr9_22002902_r_11_2908903	+
chr9	22004171	22004221	CDKN2B|NM_004936_exon_0_0_chr9_22002902_r_4_2908896	-
chr9	22004872	22004922	CDKN2B|NM_004936_exon_0_0_chr9_22002902_r_7_2908899	-
chr9	22009387	22009437	CDKN2B|NM_004936_exon_1_0_chr9_22008797_r_2_2781978	-
chr9	22008990	22009040	CDKN2B|NM_004936_exon_1_0_chr9_22008797_r_2_2781978	+
chr9	22002779	22002829	CDKN2B|NM_004936_exon_0_0_chr9_22002902_r_0_2908892	+
chr9	22004640	22004690	CDKN2B|NM_004936_exon_0_0_chr9_22002902_r_6_2908898	-
chr9	22003449	22003499	CDKN2B|NM_004936_exon_0_0_chr9_22002902_r_1_2908893	-
chr9	22008767	22008817	CDKN2B|NM_004936_exon_1_0_chr9_22008797_r_1_2781977	+
chr9	22009599	22009649	CDKN2B|NM_004936_exon_1_0_chr9_22008797_r_3_2781979	-
chr9	22004944	22004994	CDKN2B|NM_004936_exon_0_0_chr9_22002902_r_9_2908901	+
chr9	22006323	22006373	CDKN2B|NM_004936_exon_0_0_chr9_22002902_r_13_2908905	-
chr9	22004705	22004755	CDKN2B|NM_004936_exon_0_0_chr9_22002902_r_8_2908900	+
chr9	22005837	22005887	CDKN2B|NM_004936_exon_0_0_chr9_22002902_r_11_2908903	-
chr9	22005903	22005953	CDKN2B|NM_004936_exon_0_0_chr9_22002902_r_13_2908905	+
chr9	22009198	22009248	CDKN2B|NM_004936_exon_1_0_chr9_22008797_r_3_2781979	+
chr9	22003197	22003247	CDKN2B|NM_004936_exon_0_0_chr9_22002902_r_0_2908892	-
chr9	22003754	22003804	CDKN2B|NM_004936_exon_0_0_chr9_22002902_r_4_2908896	+
chr9	22003879	22003929	CDKN2B|NM_004936_exon_0_0_chr9_22002902_r_3_2908895	-
chr9	22003498	22003548	CDKN2B|NM_004936_exon_0_0_chr9_22002902_r_3_2908895	+
chr19	33793481	33793531	CEBPA|NM_004364_exon_0_0_chr19_33790840_r_10_2871342	-
chr19	33792364	33792414	CEBPA|NM_004364_exon_0_0_chr19_33790840_r_7_2871336	+
chr19	33790720	33790770	CEBPA|NM_004364_exon_0_0_chr19_33790840_r_0_2871322	+
chr19	33791192	33791242	CEBPA|NM_004364_exon_0_0_chr19_33790840_r_2_2871326	+
chr19	33793084	33793134	CEBPA|NM_004364_exon_0_0_chr19_33790840_r_10_2871342	+
chr19	33791433	33791483	CEBPA|NM_004364_exon_0_0_chr19_33790840_r_3_2871328	+
chr19	33791656	33791706	CEBPA|NM_004364_exon_0_0_chr19_33790840_r_4_2871330	+
chr19	33792794	33792844	CEBPA|NM_004364_exon_0_0_chr19_33790840_r_7_2871336	-
chr19	33792855	33792905	CEBPA|NM_004364_exon_0_0_chr19_33790840_r_9_2871340	+
chr19	33791615	33791665	CEBPA|NM_004364_exon_0_0_chr19_33790840_r_2_2871326	-
chr19	33792305	33792355	CEBPA|NM_004364_exon_0_0_chr19_33790840_r_5_2871332	-
chr19	33791152	33791202	CEBPA|NM_004364_exon_0_0_chr19_33790840_r_0_2871322	-
chr19	33791382	33791432	CEBPA|NM_004364_exon_0_0_chr19_33790840_r_1_2871324	-
chr19	33791853	33791903	CEBPA|NM_004364_exon_0_0_chr19_33790840_r_3_2871328	-
chr19	33792151	33792201	CEBPA|NM_004364_exon_0_0_chr19_33790840_r_6_2871334	+
chr19	33791913	33791963	CEBPA|NM_004364_exon_0_0_chr19_33790840_r_5_2871332	+
chr19	33792071	33792121	CEBPA|NM_004364_exon_0_0_chr19_33790840_r_4_2871330	-
chr19	33790955	33791005	CEBPA|NM_004364_exon_0_0_chr19_33790840_r_1_2871324	+
chr19	33793033	33793083	CEBPA|NM_004364_exon_0_0_chr19_33790840_r_8_2871338	-
chr19	33793247	33793297	CEBPA|NM_004364_exon_0_0_chr19_33790840_r_9_2871340	-
chr19	33792658	33792708	CEBPA|NM_004364_exon_0_0_chr19_33790840_r_8_2871338	+
chr19	33792480	33792530	CEBPA|NM_004364_exon_0_0_chr19_33790840_r_6_2871334	-
chr12	6679896	6679946	CHD4|NM_001273_exon_1_0_chr12_6680035_r_0_2692729	+
chr12	6679511	6679561	CHD4|NM_001273_exon_0_0_chr12_6679248_r_0_2692726	-
chr12	6690441	6690491	CHD4|NM_001273_exon_7_0_chr12_6690210_r_0_2692735	-
chr12	6702068	6702118	CHD4|NM_001273_exon_22_0_chr12_6701862_r_0_2692750	-
chr12	6682106	6682156	CHD4|NM_001273_exon_2_0_chr12_6682240_r_0_2692730	+
chr12	6690643	6690693	CHD4|NM_001273_exon_8_0_chr12_6690457_r_0_2692736	-
chr12	6697313	6697363	CHD4|NM_001273_exon_17_0_chr12_6697464_r_0_2692745	+
chr12	6692225	6692275	CHD4|NM_001273_exon_14_0_chr12_6692364_r_0_2692742	+
chr12	6703488	6703538	CHD4|NM_001273_exon_25_0_chr12_6703625_r_0_2692753	+
chr12	6707273	6707323	CHD4|NM_001273_exon_29_0_chr12_6707388_r_0_2692757	+
chr12	6691995	6692045	CHD4|NM_001273_exon_11_0_chr12_6691781_r_0_2692739	-
chr12	6716245	6716295	CHD4|NM_001273_exon_38_0_chr12_6715440_r_6_2847501	+
chr12	6716002	6716052	CHD4|NM_001273_exon_38_0_chr12_6715440_r_3_2847498	-
chr12	6687793	6687843	CHD4|NM_001273_exon_5_0_chr12_6687575_r_0_2692733	-
chr12	6691867	6691917	CHD4|NM_001273_exon_12_0_chr12_6692014_r_0_2692740	+
chr12	6709553	6709603	CHD4|NM_001273_exon_32_0_chr12_6709700_r_0_2692760	+
chr12	6692050	6692100	CHD4|NM_001273_exon_13_0_chr12_6692193_r_0_2692741	+
chr12	6679727	6679777	CHD4|NM_001273_exon_0_0_chr12_6679248_r_1_2692727	-
chr12	6696810	6696860	CHD4|NM_001273_exon_15_0_chr12_6696550_r_0_2692743	-
chr12	6703879	6703929	CHD4|NM_001273_exon_25_0_chr12_6703625_r_0_2692753	-
chr12	6705399	6705449	CHD4|NM_001273_exon_27_0_chr12_6705172_r_0_2692755	-
chr12	6692378	6692428	CHD4|NM_001273_exon_13_0_chr12_6692193_r_0_2692741	-
chr12	6710336	6710386	CHD4|NM_001273_exon_34_0_chr12_6710455_r_0_2692762	+
chr12	6686823	6686873	CHD4|NM_001273_exon_3_0_chr12_6686951_r_0_2692731	+
chr12	6702110	6702160	CHD4|NM_001273_exon_23_0_chr12_6702257_r_0_2692751	+
chr12	6709644	6709694	CHD4|NM_001273_exon_31_0_chr12_6709383_r_0_2692759	-
chr12	6687164	6687214	CHD4|NM_001273_exon_3_0_chr12_6686951_r_0_2692731	-
chr12	6706950	6707000	CHD4|NM_001273_exon_28_0_chr12_6707060_r_0_2692756	+
chr12	6690680	6690730	CHD4|NM_001273_exon_9_0_chr12_6690815_r_0_2692737	+
chr12	6691545	6691595	CHD4|NM_001273_exon_10_0_chr12_6691303_r_0_2692738	-
chr12	6711408	6711458	CHD4|NM_001273_exon_37_0_chr12_6711542_r_0_2692765	+
chr12	6710317	6710367	CHD4|NM_001273_exon_33_0_chr12_6710092_r_0_2692761	-
chr12	6710659	6710709	CHD4|NM_001273_exon_35_0_chr12_6710814_r_0_2692763	+
chr12	6680290	6680340	CHD4|NM_001273_exon_1_0_chr12_6680035_r_0_2692729	-
chr12	6692609	6692659	CHD4|NM_001273_exon_14_0_chr12_6692364_r_0_2692742	-
chr12	6690303	6690353	CHD4|NM_001273_exon_8_0_chr12_6690457_r_0_2692736	+
chr12	6704352	6704402	CHD4|NM_001273_exon_26_0_chr12_6704500_r_0_2692754	+
chr12	6701089	6701139	CHD4|NM_001273_exon_19_0_chr12_6700860_r_0_2692747	-
chr12	6700940	6700990	CHD4|NM_001273_exon_20_0_chr12_6701082_r_0_2692748	+
chr12	6679332	6679382	CHD4|NM_001273_exon_0_0_chr12_6679248_r_1_2692727	+
chr12	6679919	6679969	CHD4|NM_001273_exon_0_0_chr12_6679248_r_2_2692728	-
chr12	6692201	6692251	CHD4|NM_001273_exon_12_0_chr12_6692014_r_0_2692740	-
chr12	6702488	6702538	CHD4|NM_001273_exon_23_0_chr12_6702257_r_0_2692751	-
chr12	6687038	6687088	CHD4|NM_001273_exon_4_0_chr12_6687195_r_0_2692732	+
chr12	6711014	6711064	CHD4|NM_001273_exon_36_0_chr12_6711126_r_0_2692764	+
chr12	6687412	6687462	CHD4|NM_001273_exon_4_0_chr12_6687195_r_0_2692732	-
chr12	6709961	6710011	CHD4|NM_001273_exon_33_0_chr12_6710092_r_0_2692761	+
chr12	6687425	6687475	CHD4|NM_001273_exon_5_0_chr12_6687575_r_0_2692733	+
chr12	6708820	6708870	CHD4|NM_001273_exon_30_0_chr12_6708939_r_0_2692758	+
chr12	6715168	6715218	CHD4|NM_001273_exon_38_0_chr12_6715440_r_1_2847496	+
chr12	6715785	6715835	CHD4|NM_001273_exon_38_0_chr12_6715440_r_4_2847499	+
chr12	6716225	6716275	CHD4|NM_001273_exon_38_0_chr12_6715440_r_4_2847499	-
chr12	6715579	6715629	CHD4|NM_001273_exon_38_0_chr12_6715440_r_1_2847496	-
chr12	6701815	6701865	CHD4|NM_001273_exon_21_0_chr12_6701559_r_0_2692749	-
chr12	6711018	6711068	CHD4|NM_001273_exon_35_0_chr12_6710814_r_0_2692763	-
chr12	6697188	6697238	CHD4|NM_001273_exon_16_0_chr12_6696878_r_0_2692744	-
chr12	6710761	6710811	CHD4|NM_001273_exon_34_0_chr12_6710455_r_0_2692762	-
chr12	6701316	6701366	CHD4|NM_001273_exon_20_0_chr12_6701082_r_0_2692748	-
chr12	6711744	6711794	CHD4|NM_001273_exon_37_0_chr12_6711542_r_0_2692765	-
chr12	6700853	6700903	CHD4|NM_001273_exon_18_0_chr12_6700632_r_0_2692746	-
chr12	6687865	6687915	CHD4|NM_001273_exon_6_0_chr12_6688012_r_0_2692734	+
chr12	6701427	6701477	CHD4|NM_001273_exon_21_0_chr12_6701559_r_0_2692749	+
chr12	6691643	6691693	CHD4|NM_001273_exon_11_0_chr12_6691781_r_0_2692739	+
chr12	6709252	6709302	CHD4|NM_001273_exon_30_0_chr12_6708939_r_0_2692758	-
chr12	6709912	6709962	CHD4|NM_001273_exon_32_0_chr12_6709700_r_0_2692760	-
chr12	6702448	6702498	CHD4|NM_001273_exon_24_0_chr12_6702582_r_0_2692752	+
chr12	6702864	6702914	CHD4|NM_001273_exon_24_0_chr12_6702582_r_0_2692752	-
chr12	6701714	6701764	CHD4|NM_001273_exon_22_0_chr12_6701862_r_0_2692750	+
chr12	6700707	6700757	CHD4|NM_001273_exon_19_0_chr12_6700860_r_0_2692747	+
chr12	6707335	6707385	CHD4|NM_001273_exon_28_0_chr12_6707060_r_0_2692756	-
chr12	6682496	6682546	CHD4|NM_001273_exon_2_0_chr12_6682240_r_0_2692730	-
chr12	6679124	6679174	CHD4|NM_001273_exon_0_0_chr12_6679248_r_0_2692726	+
chr12	6711419	6711469	CHD4|NM_001273_exon_36_0_chr12_6711126_r_0_2692764	-
chr12	6715340	6715390	CHD4|NM_001273_exon_38_0_chr12_6715440_r_0_2692766	-
chr12	6714951	6715001	CHD4|NM_001273_exon_38_0_chr12_6715440_r_0_2692766	+
chr12	6715594	6715644	CHD4|NM_001273_exon_38_0_chr12_6715440_r_3_2847498	+
chr12	6716023	6716073	CHD4|NM_001273_exon_38_0_chr12_6715440_r_5_2847500	+
chr12	6679542	6679592	CHD4|NM_001273_exon_0_0_chr12_6679248_r_2_2692728	+
chr12	6696760	6696810	CHD4|NM_001273_exon_16_0_chr12_6696878_r_0_2692744	+
chr12	6700499	6700549	CHD4|NM_001273_exon_18_0_chr12_6700632_r_0_2692746	+
chr12	6709252	6709302	CHD4|NM_001273_exon_31_0_chr12_6709383_r_0_2692759	+
chr12	6697597	6697647	CHD4|NM_001273_exon_17_0_chr12_6697464_r_0_2692745	-
chr12	6704598	6704648	CHD4|NM_001273_exon_26_0_chr12_6704500_r_0_2692754	-
chr12	6696491	6696541	CHD4|NM_001273_exon_15_0_chr12_6696550_r_0_2692743	+
chr12	6690984	6691034	CHD4|NM_001273_exon_9_0_chr12_6690815_r_0_2692737	-
chr12	6707587	6707637	CHD4|NM_001273_exon_29_0_chr12_6707388_r_0_2692757	-
chr12	6716663	6716713	CHD4|NM_001273_exon_38_0_chr12_6715440_r_6_2847501	-
chr12	6688082	6688132	CHD4|NM_001273_exon_6_0_chr12_6688012_r_0_2692734	-
chr12	6715387	6715437	CHD4|NM_001273_exon_38_0_chr12_6715440_r_2_2847497	+
chr12	6715782	6715832	CHD4|NM_001273_exon_38_0_chr12_6715440_r_2_2847497	-
chr12	6716427	6716477	CHD4|NM_001273_exon_38_0_chr12_6715440_r_5_2847500	-
chr1	29250	29300	CRE2|_1_2661408	-
chr1	29256	29306	CRE2|_3_2661410	+
chr1	29125	29175	CRE2|_2_2661409	+
chr1	28942	28992	CRE2|_1_2661408	+
chr1	29368	29418	CRE2|_2_2661409	-
chr1	69682	69732	CRE3|_3_2661414	-
chr1	69286	69336	CRE3|_1_2661412	-
chr1	69289	69339	CRE3|_3_2661414	+
chr1	69090	69140	CRE3|_2_2661413	+
chr1	68714	68764	CRE3|_0_2661411	+
chr1	68910	68960	CRE3|_1_2661412	+
chr1	69109	69159	CRE3|_0_2661411	-
chr1	69506	69556	CRE3|_2_2661413	-
chr1	714447	714497	CRE4|_4_2661419	+
chr1	714180	714230	CRE4|_3_2661418	+
chr1	714114	714164	CRE4|_1_2661416	-
chr1	714623	714673	CRE4|_3_2661418	-
chr1	714357	714407	CRE4|_2_2661417	-
chr1	713941	713991	CRE4|_2_2661417	+
chr1	727373	727423	CRE5|_2_2661422	-
chr1	727153	727203	CRE5|_1_2661421	-
chr1	727025	727075	CRE5|_2_2661422	+
chr1	762610	762660	CRE6|_1_2820847	-
chr1	762181	762231	CRE6|_1_2820847	+
chr1	762645	762695	CRE6|_3_2820851	+
chr1	763288	763338	CRE6|_4_2820853	-
chr1	762370	762420	CRE6|_0_2661423	-
chr1	762898	762948	CRE6|_4_2820853	+
chr1	761965	762015	CRE6|_0_2661423	+
chr1	762413	762463	CRE6|_2_2820849	+
chr1	763057	763107	CRE6|_3_2820851	-
chr1	762829	762879	CRE6|_2_2820849	-
chr1	778094	778144	CRE7|_1_2820858	-
chr1	777677	777727	CRE7|_1_2820858	+
chr1	778338	778388	CRE7|_2_2820860	-
chr1	777434	777484	CRE7|_0_2820856	+
chr1	777835	777885	CRE7|_0_2820856	-
chr1	777916	777966	CRE7|_2_2820860	+
chr1	824835	824885	CRE8|_1_2661432	+
chr1	824953	825003	CRE8|_0_2661431	-
chr1	839864	839914	CRE9|_0_2820866	+
chr1	840251	840301	CRE9|_0_2820866	-
chr1	840461	840511	CRE9|_1_2820868	-
chr1	840452	840502	CRE9|_3_2820872	+
chr1	840858	840908	CRE9|_3_2820872	-
chr1	840250	840300	CRE9|_2_2820870	+
chr1	840577	840627	CRE9|_2_2820870	-
chr1	894728	894778	CRE10|_3_2820881	-
chr1	894533	894583	CRE10|_4_2820883	+
chr1	894256	894306	CRE10|_1_2661440	-
chr1	894304	894354	CRE10|_3_2820881	+
chr1	894491	894541	CRE10|_2_2820879	-
chr1	894945	894995	CRE10|_4_2820883	-
chr1	901658	901708	CRE11|_1_2820888	+
chr1	902265	902315	CRE11|_2_2820890	-
chr1	902680	902730	CRE11|_4_2820894	-
chr1	902473	902523	CRE11|_3_2820892	-
chr1	902075	902125	CRE11|_3_2820892	+
chr1	901460	901510	CRE11|_0_2820886	+
chr1	902047	902097	CRE11|_1_2820888	-
chr1	901858	901908	CRE11|_2_2820890	+
chr1	902281	902331	CRE11|_4_2820894	+
chr1	901850	901900	CRE11|_0_2820886	-
chr1	949192	949242	CRE12|_3_2820903	-
chr1	948990	949040	CRE12|_2_2820901	-
chr1	948604	948654	CRE12|_2_2820901	+
chr1	948813	948863	CRE12|_3_2820903	+
chr1	949006	949056	CRE12|_4_2820905	+
chr1	948786	948836	CRE12|_1_2820899	-
chr1	949398	949448	CRE12|_4_2820905	-
chr1	948594	948644	CRE12|_0_2820897	-
chr1	948475	948525	CRE12|_1_2820899	+
chr1	955201	955251	CRE13|_1_2661455	-
chr1	955669	955719	CRE13|_3_2661457	-
chr1	954801	954851	CRE13|_1_2661455	+
chr1	955035	955085	CRE13|_2_2661456	+
chr1	955240	955290	CRE13|_3_2661457	+
chr1	955023	955073	CRE13|_0_2661454	-
chr1	954650	954700	CRE13|_0_2661454	+
chr1	1005075	1005125	CRE14|_3_2820917	-
chr1	1004887	1004937	CRE14|_2_2820915	-
chr1	1004480	1004530	CRE14|_2_2820915	+
chr1	1004077	1004127	CRE14|_0_2661458	+
chr1	1004503	1004553	CRE14|_0_2661458	-
chr1	1004685	1004735	CRE14|_3_2820917	+
chr1	1004306	1004356	CRE14|_1_2820913	+
chr1	1004679	1004729	CRE14|_1_2820913	-
chr1	1015455	1015505	CRE15|_2_2661464	-
chr1	1014956	1015006	CRE15|_0_2661462	-
chr1	1015179	1015229	CRE15|_1_2661463	-
chr1	1014785	1014835	CRE15|_1_2661463	+
chr1	1015023	1015073	CRE15|_2_2661464	+
chr1	1045955	1046005	CRE16|_3_2820930	-
chr1	1051425	1051475	CRE17|_3_2820939	+
chr1	1051175	1051225	CRE17|_0_2820933	-
chr1	1051641	1051691	CRE17|_2_2820937	-
chr1	1051191	1051241	CRE17|_2_2820937	+
chr1	1051825	1051875	CRE17|_3_2820939	-
chr1	1051369	1051419	CRE17|_1_2820935	-
chr1	1050736	1050786	CRE17|_0_2820933	+
chr1	1070612	1070662	CRE18|_0_2661473	-
chr1	1070194	1070244	CRE18|_0_2661473	+
chr1	1070437	1070487	CRE18|_1_2661474	+
chr1	1080148	1080198	CRE19|_3_2820951	+
chr1	1079938	1079988	CRE19|_2_2820949	+
chr1	1080554	1080604	CRE19|_3_2820951	-
chr1	1080115	1080165	CRE19|_1_2820947	-
chr1	1079881	1079931	CRE19|_0_2820945	-
chr1	1080322	1080372	CRE19|_2_2820949	-
chr1	1079468	1079518	CRE19|_0_2820945	+
chr1	1079695	1079745	CRE19|_1_2820947	+
chr1	1093226	1093276	CRE20|_0_2820954	-
chr1	1093776	1093826	CRE20|_4_2820962	+
chr1	1093942	1093992	CRE20|_3_2820960	-
chr1	1093521	1093571	CRE20|_3_2820960	+
chr1	1093040	1093090	CRE20|_1_2820956	+
chr1	1093285	1093335	CRE20|_2_2820958	+
chr1	1094197	1094247	CRE20|_4_2820962	-
chr1	1093708	1093758	CRE20|_2_2820958	-
chr1	1093471	1093521	CRE20|_1_2820956	-
chr1	1092879	1092929	CRE20|_0_2820954	+
chr1	1148518	1148568	CRE21|_1_2820967	+
chr1	1148287	1148337	CRE21|_0_2820965	+
chr1	1148691	1148741	CRE21|_0_2820965	-
chr1	1148930	1148980	CRE21|_1_2820967	-
chr1	1148761	1148811	CRE21|_2_2820969	+
chr1	1149192	1149242	CRE21|_2_2820969	-
chr1	1167096	1167146	CRE22|_3_2820978	+
chr1	1167084	1167134	CRE22|_1_2820974	-
chr1	1166676	1166726	CRE22|_1_2820974	+
chr1	1167487	1167537	CRE22|_3_2820978	-
chr1	1166493	1166543	CRE22|_0_2820972	+
chr1	1167272	1167322	CRE22|_2_2820976	-
chr1	1168475	1168525	CRE23|_2_2820984	-
chr1	1167590	1167640	CRE23|_0_2661492	+
chr1	1167831	1167881	CRE23|_1_2820982	+
chr1	1168243	1168293	CRE23|_1_2820982	-
chr1	1167987	1168037	CRE23|_0_2661492	-
chr1	1168071	1168121	CRE23|_2_2820984	+
chr1	1186043	1186093	CRE24|_1_2661496	-
chr1	1186486	1186536	CRE24|_3_2820991	-
chr1	1186248	1186298	CRE24|_2_2820989	-
chr1	1186068	1186118	CRE24|_3_2820991	+
chr1	1208506	1208556	CRE25|_1_2820996	+
chr1	1208951	1209001	CRE25|_3_2821000	+
chr1	1210003	1210053	CRE25|_6_2821006	-
chr1	1208920	1208970	CRE25|_1_2820996	-
chr1	1209593	1209643	CRE25|_6_2821006	+
chr1	1208286	1208336	CRE25|_0_2820994	+
chr1	1209126	1209176	CRE25|_2_2820998	-
chr1	1209380	1209430	CRE25|_5_2821004	+
chr1	1209776	1209826	CRE25|_5_2821004	-
chr1	1208696	1208746	CRE25|_0_2820994	-
chr1	1209372	1209422	CRE25|_3_2821000	-
chr1	1209156	1209206	CRE25|_4_2821002	+
chr1	1208719	1208769	CRE25|_2_2820998	+
chr1	1209563	1209613	CRE25|_4_2821002	-
chr1	1240926	1240976	CRE26|_0_2661506	-
chr1	1240755	1240805	CRE26|_1_2821010	+
chr1	1241170	1241220	CRE26|_1_2821010	-
chr1	1241387	1241437	CRE26|_2_2821012	-
chr1	1240517	1240567	CRE26|_0_2661506	+
chr1	1240987	1241037	CRE26|_2_2821012	+
chr1	1243338	1243388	CRE27|_1_2661510	+
chr1	1243705	1243755	CRE27|_3_2661512	+
chr1	1243731	1243781	CRE27|_1_2661510	-
chr1	1243943	1243993	CRE27|_2_2661511	-
chr1	1244090	1244140	CRE27|_3_2661512	-
chr1	1243155	1243205	CRE27|_0_2661509	+
chr1	1243519	1243569	CRE27|_2_2661511	+
chr1	1243462	1243512	CRE27|_0_2661509	-
chr1	1260502	1260552	CRE28|_3_2821023	-
chr1	1259882	1259932	CRE28|_2_2821021	+
chr1	1260285	1260335	CRE28|_2_2821021	-
chr1	1259662	1259712	CRE28|_1_2661514	+
chr1	1259852	1259902	CRE28|_0_2661513	-
chr1	1260066	1260116	CRE28|_1_2661514	-
chr1	1260089	1260139	CRE28|_3_2821023	+
chr1	1284668	1284718	CRE29|_1_2821028	-
chr1	1284908	1284958	CRE29|_4_2821034	+
chr1	1285095	1285145	CRE29|_5_2821036	+
chr1	1284058	1284108	CRE29|_0_2821026	+
chr1	1285304	1285354	CRE29|_4_2821034	-
chr1	1284271	1284321	CRE29|_1_2821028	+
chr1	1284909	1284959	CRE29|_2_2821030	-
chr1	1284682	1284732	CRE29|_3_2821032	+
chr1	1285080	1285130	CRE29|_3_2821032	-
chr1	1284393	1284443	CRE29|_0_2821026	-
chr1	1310153	1310203	CRE30|_0_2821039	+
chr1	1311013	1311063	CRE30|_4_2821047	+
chr1	1310544	1310594	CRE30|_0_2821039	-
chr1	1310376	1310426	CRE30|_1_2821041	+
chr1	1310590	1310640	CRE30|_2_2821043	+
chr1	1310825	1310875	CRE30|_3_2821045	+
chr1	1311450	1311500	CRE30|_4_2821047	-
chr1	1310772	1310822	CRE30|_1_2821041	-
chr1	1310992	1311042	CRE30|_2_2821043	-
chr1	1335159	1335209	CRE31|_3_2661531	-
chr1	1334996	1335046	CRE31|_4_2661532	+
chr1	1334925	1334975	CRE31|_2_2661530	-
chr1	1334708	1334758	CRE31|_1_2661529	-
chr1	1334062	1334112	CRE31|_0_2661528	+
chr1	1335384	1335434	CRE31|_4_2661532	-
chr1	1335225	1335275	CRE31|_5_2661533	+
chr1	1335631	1335681	CRE31|_5_2661533	-
chr1	1334490	1334540	CRE31|_0_2661528	-
chr1	1334533	1334583	CRE31|_2_2661530	+
chr1	1334744	1334794	CRE31|_3_2661531	+
chr1	1334371	1334421	CRE31|_1_2661529	+
chr1	1342480	1342530	CRE32|_0_2821056	-
chr1	1343336	1343386	CRE32|_4_2821064	-
chr1	1342875	1342925	CRE32|_2_2821060	-
chr1	1342897	1342947	CRE32|_4_2821064	+
chr1	1342485	1342535	CRE32|_2_2821060	+
chr1	1342696	1342746	CRE32|_1_2821058	-
chr1	1342078	1342128	CRE32|_0_2821056	+
chr1	1342285	1342335	CRE32|_1_2821058	+
chr1	1342700	1342750	CRE32|_3_2821062	+
chr1	1343035	1343085	CRE32|_3_2821062	-
chr1	1407204	1407254	CRE33|_2_2821070	-
chr1	1407625	1407675	CRE33|_4_2821074	-
chr1	1406802	1406852	CRE33|_0_2661539	-
chr1	1407239	1407289	CRE33|_4_2821074	+
chr1	1406797	1406847	CRE33|_2_2821070	+
chr1	1407421	1407471	CRE33|_3_2821072	-
chr1	1406996	1407046	CRE33|_1_2821068	-
chr1	1407009	1407059	CRE33|_3_2821072	+
chr1	1446943	1446993	CRE35|_2_2661550	+
chr1	1447362	1447412	CRE35|_2_2661550	-
chr1	1447174	1447224	CRE35|_3_2661551	+
chr1	1447576	1447626	CRE35|_3_2661551	-
chr1	1446910	1446960	CRE35|_0_2661548	-
chr1	1447124	1447174	CRE35|_1_2661549	-
chr1	1446787	1446837	CRE35|_1_2661549	+
chr1	1509946	1509996	CRE36|_2_2821089	+
chr1	1510203	1510253	CRE36|_3_2821091	+
chr1	1510622	1510672	CRE36|_3_2821091	-
chr1	1510374	1510424	CRE36|_2_2821089	-
chr1	1510437	1510487	CRE36|_4_2821093	+
chr1	1510115	1510165	CRE36|_1_2661553	-
chr1	1509466	1509516	CRE36|_0_2661552	+
chr1	1509702	1509752	CRE36|_1_2661553	+
chr1	1509870	1509920	CRE36|_0_2661552	-
chr1	1542574	1542624	CRE37|_3_2661560	+
chr1	1543005	1543055	CRE37|_3_2661560	-
chr1	1542528	1542578	CRE37|_1_2661558	-
chr1	1542108	1542158	CRE37|_1_2661558	+
chr1	1542275	1542325	CRE37|_0_2661557	-
chr1	1542347	1542397	CRE37|_2_2661559	+
chr1	1551099	1551149	CRE38|_1_2821102	-
chr1	1551295	1551345	CRE38|_2_2821104	-
chr1	1550901	1550951	CRE38|_2_2821104	+
chr1	1551115	1551165	CRE38|_3_2821106	+
chr1	1550487	1550537	CRE38|_0_2821100	+
chr1	1550886	1550936	CRE38|_0_2821100	-
chr1	1551491	1551541	CRE38|_3_2821106	-
chr1	1550695	1550745	CRE38|_1_2821102	+
chr1	1566536	1566586	CRE39|_3_2661568	-
chr1	1566129	1566179	CRE39|_1_2661566	-
chr1	1565553	1565603	CRE39|_0_2661565	+
chr1	1566324	1566374	CRE39|_2_2661567	-
chr1	1565943	1565993	CRE39|_2_2661567	+
chr1	1566150	1566200	CRE39|_3_2661568	+
chr1	1565956	1566006	CRE39|_0_2661565	-
chr1	1565750	1565800	CRE39|_1_2661566	+
chr1	1590489	1590539	CRE40|_2_2821114	+
chr1	1590010	1590060	CRE40|_0_2661569	+
chr1	1590945	1590995	CRE40|_4_2821118	+
chr1	1590242	1590292	CRE40|_1_2661570	+
chr1	1590903	1590953	CRE40|_2_2821114	-
chr1	1590438	1590488	CRE40|_0_2661569	-
chr1	1590715	1590765	CRE40|_3_2821116	+
chr1	1591357	1591407	CRE40|_4_2821118	-
chr1	1590662	1590712	CRE40|_1_2661570	-
chr1	1609787	1609837	CRE41|_2_2661576	-
chr1	1609360	1609410	CRE41|_0_2661574	-
chr1	1610000	1610050	CRE41|_3_2661577	-
chr1	1609606	1609656	CRE41|_3_2661577	+
chr1	1609569	1609619	CRE41|_1_2661575	-
chr1	1609380	1609430	CRE41|_2_2661576	+
chr1	1609240	1609290	CRE41|_1_2661575	+
chr1	1624718	1624768	CRE42|_2_2661580	-
chr1	1624523	1624573	CRE42|_3_2661581	+
chr1	1624944	1624994	CRE42|_3_2661581	-
chr1	1624257	1624307	CRE42|_0_2661578	-
chr1	1624076	1624126	CRE42|_1_2661579	+
chr1	1624480	1624530	CRE42|_1_2661579	-
chr1	1623889	1623939	CRE42|_0_2661578	+
chr1	1655958	1656008	CRE43|_1_2661583	-
chr1	1655998	1656048	CRE43|_3_2661585	+
chr1	1655770	1655820	CRE43|_2_2661584	+
chr1	1655742	1655792	CRE43|_0_2661582	-
chr1	1655546	1655596	CRE43|_1_2661583	+
chr1	1655322	1655372	CRE43|_0_2661582	+
chr1	1676665	1676715	CRE44|_2_2821137	+
chr1	1676597	1676647	CRE44|_0_2661586	-
chr1	1676414	1676464	CRE44|_1_2821135	+
chr1	1677115	1677165	CRE44|_2_2821137	-
chr1	1676168	1676218	CRE44|_0_2661586	+
chr1	1676779	1676829	CRE44|_1_2821135	-
chr1	1677568	1677618	CRE45|_0_2821140	-
chr1	1678018	1678068	CRE45|_4_2821148	+
chr1	1677396	1677446	CRE45|_1_2821142	+
chr1	1677803	1677853	CRE45|_3_2821146	+
chr1	1678007	1678057	CRE45|_2_2821144	-
chr1	1677190	1677240	CRE45|_0_2821140	+
chr1	1677575	1677625	CRE45|_2_2821144	+
chr1	1678206	1678256	CRE45|_3_2821146	-
chr1	1677802	1677852	CRE45|_1_2821142	-
chr1	1678353	1678403	CRE45|_4_2821148	-
chr1	1709069	1709119	CRE46|_0_2821151	+
chr1	1709275	1709325	CRE46|_1_2821153	+
chr1	1709867	1709917	CRE46|_2_2821155	-
chr1	1709658	1709708	CRE46|_1_2821153	-
chr1	1709463	1709513	CRE46|_2_2821155	+
chr1	1709641	1709691	CRE46|_3_2821157	+
chr1	1709458	1709508	CRE46|_0_2821151	-
chr1	1711543	1711593	CRE47|_1_2821161	-
chr1	1711384	1711434	CRE47|_2_2821163	+
chr1	1710884	1710934	CRE47|_0_2661598	+
chr1	1711304	1711354	CRE47|_0_2661598	-
chr1	1711815	1711865	CRE47|_2_2821163	-
chr1	1765251	1765301	CRE48|_2_2821170	+
chr1	1765635	1765685	CRE48|_2_2821170	-
chr1	1764878	1764928	CRE48|_0_2821166	+
chr1	1765058	1765108	CRE48|_1_2821168	+
chr1	1765836	1765886	CRE48|_3_2821172	-
chr1	1765251	1765301	CRE48|_0_2821166	-
chr1	1821675	1821725	CRE49|_2_2821179	+
chr1	1821401	1821451	CRE49|_1_2821177	+
chr1	1821602	1821652	CRE49|_0_2821175	-
chr1	1821869	1821919	CRE49|_1_2821177	-
chr1	1821186	1821236	CRE49|_0_2821175	+
chr1	1822487	1822537	CRE50|_1_2821184	+
chr1	1822920	1822970	CRE50|_1_2821184	-
chr1	1823148	1823198	CRE50|_2_2821186	-
chr1	1822233	1822283	CRE50|_0_2821182	+
chr1	1822640	1822690	CRE50|_0_2821182	-
chr1	1822792	1822842	CRE50|_2_2821186	+
chr1	1839981	1840031	CRE51|_0_2661611	-
chr1	1840028	1840078	CRE51|_2_2661613	+
chr1	1839805	1839855	CRE51|_1_2661612	+
chr1	1840428	1840478	CRE51|_2_2661613	-
chr1	1840263	1840313	CRE51|_3_2661614	+
chr1	1840209	1840259	CRE51|_1_2661612	-
chr1	1850841	1850891	CRE52|_2_2821197	-
chr1	1850065	1850115	CRE52|_0_2821193	+
chr1	1850439	1850489	CRE52|_2_2821197	+
chr1	1850241	1850291	CRE52|_1_2821195	+
chr1	1851011	1851061	CRE52|_3_2821199	-
chr1	1850660	1850710	CRE52|_1_2821195	-
chr1	1850437	1850487	CRE52|_0_2821193	-
chr1	1850688	1850738	CRE52|_3_2821199	+
chr1	1927916	1927966	CRE53|_2_2821206	-
chr1	1927991	1928041	CRE53|_4_2821210	+
chr1	1981091	1981141	CRE54|_1_2821215	+
chr1	1981473	1981523	CRE54|_3_2821219	+
chr1	1981301	1981351	CRE54|_2_2821217	+
chr1	1981275	1981325	CRE54|_0_2821213	-
chr1	1980874	1980924	CRE54|_0_2821213	+
chr1	1981925	1981975	CRE54|_3_2821219	-
chr1	1981704	1981754	CRE54|_2_2821217	-
chr1	1981406	1981456	CRE54|_1_2821215	-
chr1	2064607	2064657	CRE55|_3_2821227	+
chr1	2064808	2064858	CRE55|_2_2821225	-
chr1	2064144	2064194	CRE55|_1_2821223	+
chr1	2064555	2064605	CRE55|_1_2821223	-
chr1	2063916	2063966	CRE55|_0_2661628	+
chr1	2064449	2064499	CRE55|_2_2821225	+
chr1	2121122	2121172	CRE56|_1_2821232	-
chr1	2121164	2121214	CRE56|_3_2821236	+
chr1	2121562	2121612	CRE56|_3_2821236	-
chr1	2121331	2121381	CRE56|_2_2821234	-
chr1	2120901	2120951	CRE56|_0_2821230	-
chr1	2120932	2120982	CRE56|_2_2821234	+
chr1	2120798	2120848	CRE56|_1_2821232	+
chr1	2127109	2127159	CRE57|_4_2661640	-
chr1	2126515	2126565	CRE57|_1_2661637	-
chr1	2126318	2126368	CRE57|_2_2661638	+
chr1	2126906	2126956	CRE57|_3_2661639	-
chr1	2126508	2126558	CRE57|_3_2661639	+
chr1	2126724	2126774	CRE57|_4_2661640	+
chr1	2126310	2126360	CRE57|_0_2661636	-
chr1	2126710	2126760	CRE57|_2_2661638	-
chr1	2126181	2126231	CRE57|_1_2661637	+
chr1	2159018	2159068	CRE58|_1_2821246	-
chr1	2158628	2158678	CRE58|_1_2821246	+
chr1	2159438	2159488	CRE58|_3_2821250	-
chr1	2158420	2158470	CRE58|_0_2821244	+
chr1	2158822	2158872	CRE58|_2_2821248	+
chr1	2159014	2159064	CRE58|_3_2821250	+
chr1	2158814	2158864	CRE58|_0_2821244	-
chr1	2178118	2178168	CRE59|_3_2821256	+
chr1	2177898	2177948	CRE59|_2_2821254	+
chr1	2177859	2177909	CRE59|_0_2661645	-
chr1	2178291	2178341	CRE59|_2_2821254	-
chr1	2178066	2178116	CRE59|_1_2661646	-
chr1	2221521	2221571	CRE60|_1_2821261	+
chr1	2221917	2221967	CRE60|_1_2821261	-
chr1	2222280	2222330	CRE60|_3_2821265	-
chr1	2221893	2221943	CRE60|_3_2821265	+
chr1	2221325	2221375	CRE60|_0_2821259	+
chr1	2222095	2222145	CRE60|_2_2821263	-
chr1	2221711	2221761	CRE60|_0_2821259	-
chr1	2221700	2221750	CRE60|_2_2821263	+
chr1	2232374	2232424	CRE61|_1_2821269	-
chr1	2232805	2232855	CRE61|_3_2821273	-
chr1	2232145	2232195	CRE61|_0_2661653	-
chr1	2232404	2232454	CRE61|_3_2821273	+
chr1	2231964	2232014	CRE61|_1_2821269	+
chr1	2231724	2231774	CRE61|_0_2661653	+
chr1	2232587	2232637	CRE61|_2_2821271	-
chr1	2232180	2232230	CRE61|_2_2821271	+
chr1	2246258	2246308	CRE62|_2_2821280	+
chr1	2247159	2247209	CRE62|_6_2821288	+
chr1	2247130	2247180	CRE62|_4_2821284	-
chr1	2246210	2246260	CRE62|_0_2821276	-
chr1	2247346	2247396	CRE62|_5_2821286	-
chr1	2246048	2246098	CRE62|_1_2821278	+
chr1	2246474	2246524	CRE62|_3_2821282	+
chr1	2245814	2245864	CRE62|_0_2821276	+
chr1	2246888	2246938	CRE62|_3_2821282	-
chr1	2247567	2247617	CRE62|_6_2821288	-
chr1	2246657	2246707	CRE62|_2_2821280	-
chr1	2246442	2246492	CRE62|_1_2821278	-
chr1	2246935	2246985	CRE62|_5_2821286	+
chr1	2246786	2246836	CRE62|_4_2821284	+
chr1	2323109	2323159	CRE63|_1_2661665	+
chr1	2323311	2323361	CRE63|_2_2661666	+
chr1	2322909	2322959	CRE63|_0_2661664	+
chr1	2323706	2323756	CRE63|_2_2661666	-
chr1	2323909	2323959	CRE63|_3_2661667	-
chr1	2323301	2323351	CRE63|_0_2661664	-
chr1	2323536	2323586	CRE63|_1_2661665	-
chr1	2323582	2323632	CRE63|_3_2661667	+
chr1	2345154	2345204	CRE64|_4_2821300	-
chr1	2344528	2344578	CRE64|_1_2661669	-
chr1	2344724	2344774	CRE64|_2_2821296	-
chr1	2344960	2345010	CRE64|_3_2821298	-
chr1	2344318	2344368	CRE64|_0_2661668	-
chr1	2343913	2343963	CRE64|_0_2661668	+
chr1	2344770	2344820	CRE64|_4_2821300	+
chr1	2344331	2344381	CRE64|_2_2821296	+
chr1	2344533	2344583	CRE64|_3_2821298	+
chr1	2344196	2344246	CRE64|_1_2661669	+
chr1	2457994	2458044	CRE65|_3_2821309	+
chr1	2457598	2457648	CRE65|_1_2821305	+
chr1	2458002	2458052	CRE65|_1_2821305	-
chr1	2457406	2457456	CRE65|_0_2821303	+
chr1	2458189	2458239	CRE65|_2_2821307	-
chr1	2458389	2458439	CRE65|_3_2821309	-
chr1	2457879	2457929	CRE65|_2_2821307	+
chr1	2457729	2457779	CRE65|_0_2821303	-
chr1	2479249	2479299	CRE66|_1_2821314	-
chr1	2479008	2479058	CRE66|_0_2821312	-
chr1	2479092	2479142	CRE66|_2_2821316	+
chr1	2479507	2479557	CRE66|_2_2821316	-
chr1	2478845	2478895	CRE66|_1_2821314	+
chr1	2478602	2478652	CRE66|_0_2821312	+
chr1	2480265	2480315	CRE67|_2_2821322	-
chr1	2479352	2479402	CRE67|_0_2661680	+
chr1	2479846	2479896	CRE67|_2_2821322	+
chr1	2479599	2479649	CRE67|_1_2821320	+
chr1	2479783	2479833	CRE67|_0_2661680	-
chr1	2488063	2488113	CRE68|_1_2821327	-
chr1	2488117	2488167	CRE68|_3_2821331	+
chr1	2487443	2487493	CRE68|_0_2821325	+
chr1	2488754	2488804	CRE68|_4_2821333	-
chr1	2488512	2488562	CRE68|_3_2821331	-
chr1	2488302	2488352	CRE68|_2_2821329	-
chr1	2487830	2487880	CRE68|_0_2821325	-
chr1	2488351	2488401	CRE68|_4_2821333	+
chr1	2487672	2487722	CRE68|_1_2821327	+
chr1	2487875	2487925	CRE68|_2_2821329	+
chr1	2509894	2509944	CRE69|_4_2821344	+
chr1	2510093	2510143	CRE69|_5_2821346	+
chr1	2509312	2509362	CRE69|_0_2821336	-
chr1	2509130	2509180	CRE69|_1_2821338	+
chr1	2509804	2509854	CRE69|_2_2821340	-
chr1	2509632	2509682	CRE69|_3_2821342	+
chr1	2510047	2510097	CRE69|_3_2821342	-
chr1	2509384	2509434	CRE69|_2_2821340	+
chr1	2509497	2509547	CRE69|_1_2821338	-
chr1	2517828	2517878	CRE70|_4_2661698	+
chr1	2517554	2517604	CRE70|_1_2661695	-
chr1	2517322	2517372	CRE70|_0_2661694	-
chr1	2517793	2517843	CRE70|_2_2661696	-
chr1	2517378	2517428	CRE70|_2_2661696	+
chr1	2518009	2518059	CRE70|_3_2661697	-
chr1	2518274	2518324	CRE70|_4_2661698	-
chr1	2516911	2516961	CRE70|_0_2661694	+
chr1	2517133	2517183	CRE70|_1_2661695	+
chr1	2517607	2517657	CRE70|_3_2661697	+
chr1	2573840	2573890	CRE71|_0_2661699	+
chr1	2574326	2574376	CRE71|_2_2661701	+
chr1	2574488	2574538	CRE71|_1_2661700	-
chr1	2574240	2574290	CRE71|_0_2661699	-
chr1	2574966	2575016	CRE71|_3_2661702	-
chr1	2574076	2574126	CRE71|_1_2661700	+
chr1	2574729	2574779	CRE71|_2_2661701	-
chr1	2574568	2574618	CRE71|_3_2661702	+
chr1	2629409	2629459	CRE72|_1_2821360	-
chr1	2629235	2629285	CRE72|_2_2821362	+
chr1	3087343	3087393	CRE73|_2_2661708	+
chr1	3087958	3088008	CRE73|_3_2661709	-
chr1	3086936	3086986	CRE73|_0_2661706	+
chr1	3087753	3087803	CRE73|_2_2661708	-
chr1	3087336	3087386	CRE73|_0_2661706	-
chr1	3087537	3087587	CRE73|_1_2661707	-
chr1	3087158	3087208	CRE73|_1_2661707	+
chr1	3087544	3087594	CRE73|_3_2661709	+
chr1	3233461	3233511	CRE74|_3_2821375	+
chr1	3232997	3233047	CRE74|_1_2821371	+
chr1	3233409	3233459	CRE74|_1_2821371	-
chr1	3233238	3233288	CRE74|_2_2821373	+
chr1	3233658	3233708	CRE74|_2_2821373	-
chr1	3232746	3232796	CRE74|_0_2821369	+
chr1	3233167	3233217	CRE74|_0_2821369	-
chr1	3233887	3233937	CRE74|_3_2821375	-
chr1	3541971	3542021	CRE75|_5_2661719	+
chr1	3541336	3541386	CRE75|_2_2661716	+
chr1	3542387	3542437	CRE75|_5_2661719	-
chr1	3541755	3541805	CRE75|_4_2661718	+
chr1	3541757	3541807	CRE75|_2_2661716	-
chr1	3541118	3541168	CRE75|_1_2661715	+
chr1	3540895	3540945	CRE75|_0_2661714	+
chr1	3541935	3541985	CRE75|_3_2661717	-
chr1	3542150	3542200	CRE75|_4_2661718	-
chr1	3541312	3541362	CRE75|_0_2661714	-
chr1	3566505	3566555	CRE76|_1_2821384	-
chr1	3566530	3566580	CRE76|_3_2821388	+
chr1	3566326	3566376	CRE76|_2_2821386	+
chr1	3566275	3566325	CRE76|_0_2661720	-
chr1	3566105	3566155	CRE76|_1_2821384	+
chr1	3565893	3565943	CRE76|_0_2661720	+
chr1	3566720	3566770	CRE76|_2_2821386	-
chr1	3593887	3593937	CRE77|_0_2661724	-
chr1	3593718	3593768	CRE77|_1_2821392	+
chr1	3593957	3594007	CRE77|_2_2821394	+
chr1	3594114	3594164	CRE77|_1_2821392	-
chr1	3663822	3663872	CRE78|_3_2821401	+
chr1	3664251	3664301	CRE78|_3_2821401	-
chr1	3663521	3663571	CRE78|_0_2661727	-
chr1	3663771	3663821	CRE78|_1_2661728	-
chr1	3663337	3663387	CRE78|_1_2661728	+
chr1	3663597	3663647	CRE78|_2_2821399	+
chr1	3663995	3664045	CRE78|_2_2821399	-
chr1	3663104	3663154	CRE78|_0_2661727	+
chr1	3712556	3712606	CRE79|_1_2821406	+
chr1	3712955	3713005	CRE79|_1_2821406	-
chr1	3712715	3712765	CRE79|_0_2821404	-
chr1	3713033	3713083	CRE79|_3_2821410	+
chr1	3712793	3712843	CRE79|_2_2821408	+
chr1	3712310	3712360	CRE79|_0_2821404	+
chr1	3713203	3713253	CRE79|_2_2821408	-
chr1	3759821	3759871	CRE80|_3_2821421	+
chr1	3759243	3759293	CRE80|_0_2821415	+
chr1	3759816	3759866	CRE80|_1_2821417	-
chr1	3759671	3759721	CRE80|_0_2821415	-
chr1	3760250	3760300	CRE80|_3_2821421	-
chr1	3759697	3759747	CRE80|_2_2821419	+
chr1	3773683	3773733	CRE81|_0_2821424	-
chr1	3773910	3773960	CRE81|_1_2821426	-
chr1	3774343	3774393	CRE81|_3_2821430	-
chr1	3773252	3773302	CRE81|_0_2821424	+
chr1	3774134	3774184	CRE81|_2_2821428	-
chr1	3773500	3773550	CRE81|_1_2821426	+
chr1	3773959	3774009	CRE81|_3_2821430	+
chr1	3774181	3774231	CRE81|_4_2821432	+
chr1	3773723	3773773	CRE81|_2_2821428	+
chr1	3797620	3797670	CRE82|_2_2821439	+
chr1	3797119	3797169	CRE82|_0_2821435	+
chr1	3797533	3797583	CRE82|_0_2821435	-
chr1	3797779	3797829	CRE82|_1_2821437	-
chr1	3798023	3798073	CRE82|_2_2821439	-
chr1	3797372	3797422	CRE82|_1_2821437	+
chr1	3817009	3817059	CRE83|_2_2821446	+
chr1	3817663	3817713	CRE83|_3_2821448	-
chr1	3817885	3817935	CRE83|_4_2821450	-
chr1	3816784	3816834	CRE83|_1_2821444	+
chr1	3816955	3817005	CRE83|_0_2821442	-
chr1	3817249	3817299	CRE83|_3_2821448	+
chr1	3817699	3817749	CRE83|_5_2821452	+
chr1	3817426	3817476	CRE83|_2_2821446	-
chr1	3817482	3817532	CRE83|_4_2821450	+
chr1	3816553	3816603	CRE83|_0_2821442	+
chr1	3817181	3817231	CRE83|_1_2821444	-
chr1	3818050	3818100	CRE83|_5_2821452	-
chr1	4237454	4237504	CRE84|_0_2661754	-
chr1	4237089	4237139	CRE84|_0_2661754	+
chr1	4238034	4238084	CRE84|_3_2661757	-
chr1	4237451	4237501	CRE84|_2_2661756	+
chr1	4363358	4363408	CRE85|_1_2661759	-
chr1	4363750	4363800	CRE85|_3_2661761	-
chr1	4362930	4362980	CRE85|_1_2661759	+
chr1	4363527	4363577	CRE85|_2_2661760	-
chr1	4362784	4362834	CRE85|_0_2661758	+
chr1	4363403	4363453	CRE85|_3_2661761	+
chr1	4439469	4439519	CRE86|_0_2661762	+
chr1	4439683	4439733	CRE86|_1_2661763	+
chr1	4440275	4440325	CRE86|_2_2661764	-
chr1	4439818	4439868	CRE86|_0_2661762	-
chr1	4506303	4506353	CRE87|_0_2661765	+
chr1	4506975	4507025	CRE87|_1_2821467	-
chr1	5978182	5978232	CRE88|_2_2821477	+
chr1	5978141	5978191	CRE88|_0_2661769	-
chr1	5978289	5978339	CRE88|_1_2821475	-
chr1	5977751	5977801	CRE88|_0_2661769	+
chr1	6036197	6036247	CRE89|_1_2661773	-
chr1	6035940	6035990	CRE89|_0_2661772	-
chr1	6035782	6035832	CRE89|_1_2661773	+
chr1	6036024	6036074	CRE89|_2_2661774	+
chr1	6036420	6036470	CRE89|_2_2661774	-
chr1	6035521	6035571	CRE89|_0_2661772	+
chr1	6052582	6052632	CRE90|_2_2821487	-
chr1	6051672	6051722	CRE90|_0_2821483	+
chr1	6052395	6052445	CRE90|_3_2821489	+
chr1	6052815	6052865	CRE90|_3_2821489	-
chr1	6052341	6052391	CRE90|_1_2821485	-
chr1	6051921	6051971	CRE90|_1_2821485	+
chr1	6052084	6052134	CRE90|_0_2821483	-
chr1	6052165	6052215	CRE90|_2_2821487	+
chr1	6087217	6087267	CRE91|_3_2661782	-
chr1	6086523	6086573	CRE91|_0_2661779	-
chr1	6086816	6086866	CRE91|_3_2661782	+
chr1	6087002	6087052	CRE91|_2_2661781	-
chr1	6086583	6086633	CRE91|_2_2661781	+
chr1	6086354	6086404	CRE91|_1_2661780	+
chr1	6086113	6086163	CRE91|_0_2661779	+
chr1	6086777	6086827	CRE91|_1_2661780	-
chr1	6088067	6088117	CRE92|_0_2661783	-
chr1	6088720	6088770	CRE92|_3_2661786	-
chr1	6088101	6088151	CRE92|_2_2661785	+
chr1	6087664	6087714	CRE92|_0_2661783	+
chr1	6088494	6088544	CRE92|_2_2661785	-
chr1	6087888	6087938	CRE92|_1_2661784	+
chr1	6088293	6088343	CRE92|_1_2661784	-
chr1	6088300	6088350	CRE92|_3_2661786	+
chr1	6088917	6088967	CRE92|_4_2661787	-
chr1	6088522	6088572	CRE92|_4_2661787	+
chr1	6259779	6259829	CRE93|_3_2821507	+
chr1	6259291	6259341	CRE93|_1_2821503	+
chr1	6259449	6259499	CRE93|_0_2821501	-
chr1	6259708	6259758	CRE93|_1_2821503	-
chr1	6259949	6259999	CRE93|_2_2821505	-
chr1	6259542	6259592	CRE93|_2_2821505	+
chr1	6259055	6259105	CRE93|_0_2821501	+
chr1	6260016	6260066	CRE93|_4_2821509	+
chr1	6260381	6260431	CRE93|_4_2821509	-
chr1	6295841	6295891	CRE94|_3_2661796	+
chr1	6295805	6295855	CRE94|_1_2661794	-
chr1	6296679	6296729	CRE94|_5_2661798	-
chr1	6296249	6296299	CRE94|_3_2661796	-
chr1	6295413	6295463	CRE94|_1_2661794	+
chr1	6295589	6295639	CRE94|_0_2661793	-
chr1	6295616	6295666	CRE94|_2_2661795	+
chr1	6296256	6296306	CRE94|_5_2661798	+
chr1	6296025	6296075	CRE94|_2_2661795	-
chr1	6296046	6296096	CRE94|_4_2661797	+
chr1	6453689	6453739	CRE95|_1_2821519	+
chr1	6454339	6454389	CRE95|_2_2821521	-
chr1	6454104	6454154	CRE95|_1_2821519	-
chr1	6454596	6454646	CRE95|_3_2821523	-
chr1	6453938	6453988	CRE95|_2_2821521	+
chr1	6453442	6453492	CRE95|_0_2821517	+
chr1	6453863	6453913	CRE95|_0_2821517	-
chr1	6454171	6454221	CRE95|_3_2821523	+
chr1	6551326	6551376	CRE96|_3_2821532	-
chr1	6550918	6550968	CRE96|_1_2821528	-
chr1	6550724	6550774	CRE96|_0_2821526	-
chr1	6551164	6551214	CRE96|_2_2821530	-
chr1	6550934	6550984	CRE96|_3_2821532	+
chr1	6550533	6550583	CRE96|_1_2821528	+
chr1	6550323	6550373	CRE96|_0_2821526	+
chr1	6550717	6550767	CRE96|_2_2821530	+
chr1	6614735	6614785	CRE97|_2_2821539	-
chr1	6614508	6614558	CRE97|_1_2821537	-
chr1	6614554	6614604	CRE97|_3_2821541	+
chr1	6614337	6614387	CRE97|_2_2821539	+
chr1	6615218	6615268	CRE97|_4_2821543	-
chr1	6614312	6614362	CRE97|_0_2821535	-
chr1	6614791	6614841	CRE97|_4_2821543	+
chr1	6614966	6615016	CRE97|_3_2821541	-
chr1	6614080	6614130	CRE97|_1_2821537	+
chr1	6613926	6613976	CRE97|_0_2821535	+
chr1	6640574	6640624	CRE98|_5_2821556	+
chr1	6640961	6641011	CRE98|_5_2821556	-
chr1	6640085	6640135	CRE98|_1_2821548	-
chr1	6639903	6639953	CRE98|_2_2821550	+
chr1	6640344	6640394	CRE98|_4_2821554	+
chr1	6639855	6639905	CRE98|_0_2821546	-
chr1	6640737	6640787	CRE98|_4_2821554	-
chr1	6640129	6640179	CRE98|_3_2821552	+
chr1	6639686	6639736	CRE98|_1_2821548	+
chr1	6639457	6639507	CRE98|_0_2821546	+
chr1	6640518	6640568	CRE98|_3_2821552	-
chr1	6640304	6640354	CRE98|_2_2821550	-
chr1	6662474	6662524	CRE99|_0_2661818	-
chr1	6662297	6662347	CRE99|_1_2661819	+
chr1	6663190	6663240	CRE99|_3_2661821	-
chr1	6662778	6662828	CRE99|_3_2661821	+
chr1	6662727	6662777	CRE99|_1_2661819	-
chr1	6662064	6662114	CRE99|_0_2661818	+
chr1	6662942	6662992	CRE99|_2_2661820	-
chr1	6662538	6662588	CRE99|_2_2661820	+
chr1	6673571	6673621	CRE100|_3_2821567	-
chr1	6672884	6672934	CRE100|_0_2661822	-
chr1	6672692	6672742	CRE100|_1_2661823	+
chr1	6673170	6673220	CRE100|_3_2821567	+
chr1	6672939	6672989	CRE100|_2_2821565	+
chr1	6673792	6673842	CRE100|_4_2821569	-
chr1	6673358	6673408	CRE100|_4_2821569	+
chr1	6673106	6673156	CRE100|_1_2661823	-
chr1	6673354	6673404	CRE100|_2_2821565	-
chr1	6672542	6672592	CRE100|_0_2661822	+
chr1	6674326	6674376	CRE101|_1_2661828	-
chr1	6674140	6674190	CRE101|_2_2821573	+
chr1	6674740	6674790	CRE101|_3_2821575	-
chr1	6673931	6673981	CRE101|_1_2661828	+
chr1	6673719	6673769	CRE101|_0_2661827	+
chr1	6674118	6674168	CRE101|_0_2661827	-
chr1	6674341	6674391	CRE101|_3_2821575	+
chr1	6674534	6674584	CRE101|_2_2821573	-
chr1	6685077	6685127	CRE102|_1_2821579	+
chr1	6684889	6684939	CRE102|_0_2661831	+
chr1	6685274	6685324	CRE102|_0_2661831	-
chr1	6685664	6685714	CRE102|_2_2821581	-
chr1	6685280	6685330	CRE102|_2_2821581	+
chr1	6685457	6685507	CRE102|_3_2821583	+
chr1	6685511	6685561	CRE102|_1_2821579	-
chr1	6761802	6761852	CRE103|_4_2821594	+
chr1	6761793	6761843	CRE103|_2_2821590	-
chr1	6761385	6761435	CRE103|_2_2821590	+
chr1	6761557	6761607	CRE103|_1_2821588	-
chr1	6761340	6761390	CRE103|_0_2821586	-
chr1	6760956	6761006	CRE103|_0_2821586	+
chr1	6761992	6762042	CRE103|_3_2821592	-
chr1	6761157	6761207	CRE103|_1_2821588	+
chr1	6761586	6761636	CRE103|_3_2821592	+
chr1	6762138	6762188	CRE103|_4_2821594	-
chr1	6803946	6803996	CRE104|_4_2821603	+
chr1	6803277	6803327	CRE104|_1_2661841	+
chr1	6804130	6804180	CRE104|_3_2821601	-
chr1	6803716	6803766	CRE104|_3_2821601	+
chr1	6803903	6803953	CRE104|_2_2821599	-
chr1	6803685	6803735	CRE104|_1_2661841	-
chr1	6803572	6803622	CRE104|_2_2821599	+
chr1	6845218	6845268	CRE105|_4_2821611	-
chr1	6844367	6844417	CRE105|_0_2661845	-
chr1	6844792	6844842	CRE105|_2_2821607	-
chr1	6843976	6844026	CRE105|_0_2661845	+
chr1	6844194	6844244	CRE105|_1_2661846	+
chr1	6844619	6844669	CRE105|_3_2821609	+
chr1	6844824	6844874	CRE105|_4_2821611	+
chr1	6845025	6845075	CRE105|_3_2821609	-
chr1	6844593	6844643	CRE105|_1_2661846	-
chr1	6844397	6844447	CRE105|_2_2821607	+
chr1	7740208	7740258	CRE106|_1_2821615	+
chr1	7740862	7740912	CRE106|_2_2821617	-
chr1	7740707	7740757	CRE106|_3_2821619	+
chr1	7739961	7740011	CRE106|_0_2661850	+
chr1	7740449	7740499	CRE106|_2_2821617	+
chr1	7741108	7741158	CRE106|_3_2821619	-
chr1	7740396	7740446	CRE106|_0_2661850	-
chr1	7740634	7740684	CRE106|_1_2821615	-
chr1	7831940	7831990	CRE107|_4_2821630	-
chr1	7831734	7831784	CRE107|_5_2821632	+
chr1	7831515	7831565	CRE107|_2_2821626	-
chr1	7831090	7831140	CRE107|_0_2821622	-
chr1	7830891	7830941	CRE107|_1_2821624	+
chr1	7831715	7831765	CRE107|_3_2821628	-
chr1	7831113	7831163	CRE107|_2_2821626	+
chr1	7830680	7830730	CRE107|_0_2821622	+
chr1	7831526	7831576	CRE107|_4_2821630	+
chr1	7831374	7831424	CRE107|_3_2821628	+
chr1	7832072	7832122	CRE107|_5_2821632	-
chr1	7843564	7843614	CRE108|_0_2661860	+
chr1	7844190	7844240	CRE108|_1_2661861	-
chr1	7843957	7844007	CRE108|_2_2821637	+
chr1	7844543	7844593	CRE108|_3_2821639	-
chr1	7844142	7844192	CRE108|_3_2821639	+
chr1	7843949	7843999	CRE108|_0_2661860	-
chr1	7887388	7887438	CRE109|_1_2661865	-
chr1	7887167	7887217	CRE109|_0_2661864	-
chr1	7887415	7887465	CRE109|_3_2661867	+
chr1	7887202	7887252	CRE109|_2_2661866	+
chr1	7886784	7886834	CRE109|_0_2661864	+
chr1	7887796	7887846	CRE109|_3_2661867	-
chr1	7887625	7887675	CRE109|_4_2661868	+
chr1	7887605	7887655	CRE109|_2_2661866	-
chr1	7888016	7888066	CRE109|_4_2661868	-
chr1	7886991	7887041	CRE109|_1_2661865	+
chr1	8013882	8013932	CRE110|_1_2821648	+
chr1	8014314	8014364	CRE110|_3_2821652	+
chr1	8014292	8014342	CRE110|_1_2821648	-
chr1	8014526	8014576	CRE110|_4_2821654	+
chr1	8014071	8014121	CRE110|_0_2821646	-
chr1	8014095	8014145	CRE110|_2_2821650	+
chr1	8014721	8014771	CRE110|_3_2821652	-
chr1	8014509	8014559	CRE110|_2_2821650	-
chr1	8014845	8014895	CRE110|_4_2821654	-
chr1	8021954	8022004	CRE111|_5_2821666	+
chr1	8021712	8021762	CRE111|_2_2821660	-
chr1	8021288	8021338	CRE111|_2_2821660	+
chr1	8022350	8022400	CRE111|_5_2821666	-
chr1	8021502	8021552	CRE111|_3_2821662	+
chr1	8021493	8021543	CRE111|_1_2821658	-
chr1	8021739	8021789	CRE111|_4_2821664	+
chr1	8021283	8021333	CRE111|_0_2661874	-
chr1	8022123	8022173	CRE111|_4_2821664	-
chr1	8021909	8021959	CRE111|_3_2821662	-
chr1	8021144	8021194	CRE111|_1_2821658	+
chr1	8054533	8054583	CRE112|_2_2821673	-
chr1	8097585	8097635	CRE113|_2_2661885	+
chr1	8097574	8097624	CRE113|_0_2661883	-
chr1	8098151	8098201	CRE113|_3_2661886	-
chr1	8097195	8097245	CRE113|_0_2661883	+
chr1	8097390	8097440	CRE113|_1_2661884	+
chr1	8157820	8157870	CRE114|_2_2821683	-
chr1	8157403	8157453	CRE114|_2_2821683	+
chr1	8157317	8157367	CRE114|_0_2661887	-
chr1	8157555	8157605	CRE114|_1_2821681	-
chr1	8156906	8156956	CRE114|_0_2661887	+
chr1	8157133	8157183	CRE114|_1_2821681	+
chr1	8187473	8187523	CRE115|_2_2821688	+
chr1	8187412	8187462	CRE115|_0_2661890	-
chr1	8187665	8187715	CRE115|_1_2821686	-
chr1	8187192	8187242	CRE115|_1_2821686	+
chr1	8212735	8212785	CRE116|_1_2821693	+
chr1	8213065	8213115	CRE116|_1_2821693	-
chr1	8213030	8213080	CRE116|_2_2821695	+
chr1	8229804	8229854	CRE117|_3_2821705	+
chr1	8229535	8229585	CRE117|_0_2661897	-
chr1	8230244	8230294	CRE117|_3_2821705	-
chr1	8229602	8229652	CRE117|_2_2821703	+
chr1	8229775	8229825	CRE117|_1_2821701	-
chr1	8229997	8230047	CRE117|_2_2821703	-
chr1	8483224	8483274	CRE118|_1_2821710	+
chr1	8483689	8483739	CRE118|_3_2821714	+
chr1	8483453	8483503	CRE118|_2_2821712	+
chr1	8483428	8483478	CRE118|_0_2821708	-
chr1	8483875	8483925	CRE118|_2_2821712	-
chr1	8483015	8483065	CRE118|_0_2821708	+
chr1	8484104	8484154	CRE118|_3_2821714	-
chr1	8483648	8483698	CRE118|_1_2821710	-
chr1	8487978	8488028	CRE119|_2_2821721	+
chr1	8487771	8487821	CRE119|_1_2821719	+
chr1	8488584	8488634	CRE119|_3_2821723	-
chr1	8487976	8488026	CRE119|_0_2821717	-
chr1	8488193	8488243	CRE119|_1_2821719	-
chr1	8488195	8488245	CRE119|_3_2821723	+
chr1	8488384	8488434	CRE119|_2_2821721	-
chr1	8487648	8487698	CRE119|_0_2821717	+
chr1	8585838	8585888	CRE120|_2_2661911	-
chr1	8585409	8585459	CRE120|_2_2661911	+
chr1	8585209	8585259	CRE120|_1_2661910	+
chr1	8585378	8585428	CRE120|_0_2661909	-
chr1	8586056	8586106	CRE120|_3_2661912	-
chr1	8584977	8585027	CRE120|_0_2661909	+
chr1	8585635	8585685	CRE120|_3_2661912	+
chr1	8585868	8585918	CRE120|_4_2661913	+
chr1	8586256	8586306	CRE120|_4_2661913	-
chr1	8585606	8585656	CRE120|_1_2661910	-
chr1	8773205	8773255	CRE121|_2_2821734	-
chr1	8773226	8773276	CRE121|_4_2821738	+
chr1	8773857	8773907	CRE121|_5_2821740	-
chr1	8772793	8772843	CRE121|_2_2821734	+
chr1	8773415	8773465	CRE121|_3_2821736	-
chr1	8772366	8772416	CRE121|_0_2661914	+
chr1	8773017	8773067	CRE121|_3_2821736	+
chr1	8772986	8773036	CRE121|_1_2821732	-
chr1	8772770	8772820	CRE121|_0_2661914	-
chr1	8773437	8773487	CRE121|_5_2821740	+
chr1	8772572	8772622	CRE121|_1_2821732	+
chr1	8877685	8877735	CRE122|_3_2821747	+
chr1	8877000	8877050	CRE122|_0_2661920	+
chr1	8877635	8877685	CRE122|_1_2821743	-
chr1	8878321	8878371	CRE122|_4_2821749	-
chr1	8877916	8877966	CRE122|_2_2821745	-
chr1	8877925	8877975	CRE122|_4_2821749	+
chr1	8878130	8878180	CRE122|_3_2821747	-
chr1	8877473	8877523	CRE122|_2_2821745	+
chr1	8877240	8877290	CRE122|_1_2821743	+
chr1	8877427	8877477	CRE122|_0_2661920	-
chr1	8938586	8938636	CRE123|_3_2821758	+
chr1	8938536	8938586	CRE123|_1_2821754	-
chr1	8938112	8938162	CRE123|_1_2821754	+
chr1	8938755	8938805	CRE123|_2_2821756	-
chr1	8938997	8939047	CRE123|_3_2821758	-
chr1	8938290	8938340	CRE123|_0_2821752	-
chr1	8938366	8938416	CRE123|_2_2821756	+
chr1	8937950	8938000	CRE123|_0_2821752	+
chr1	8939770	8939820	CRE124|_1_2821762	-
chr1	8939584	8939634	CRE124|_2_2821764	+
chr1	8939542	8939592	CRE124|_0_2661929	-
chr1	8940410	8940460	CRE124|_4_2821768	-
chr1	8939142	8939192	CRE124|_0_2661929	+
chr1	8939808	8939858	CRE124|_3_2821766	+
chr1	8940025	8940075	CRE124|_4_2821768	+
chr1	8939992	8940042	CRE124|_2_2821764	-
chr1	8939379	8939429	CRE124|_1_2821762	+
chr1	8940213	8940263	CRE124|_3_2821766	-
chr1	9097562	9097612	CRE125|_1_2821773	-
chr1	9097317	9097367	CRE125|_0_2821771	-
chr1	9097392	9097442	CRE125|_2_2821775	+
chr1	9097136	9097186	CRE125|_1_2821773	+
chr1	9097785	9097835	CRE125|_2_2821775	-
chr1	9096953	9097003	CRE125|_0_2821771	+
chr1	9129549	9129599	CRE126|_4_2821785	+
chr1	9129742	9129792	CRE126|_3_2821783	-
chr1	9129543	9129593	CRE126|_2_2821781	-
chr1	9129119	9129169	CRE126|_0_2661937	-
chr1	9129344	9129394	CRE126|_3_2821783	+
chr1	9129133	9129183	CRE126|_2_2821781	+
chr1	9129326	9129376	CRE126|_1_2821779	-
chr1	9129937	9129987	CRE126|_4_2821785	-
chr1	9128793	9128843	CRE126|_0_2661937	+
chr1	9142812	9142862	CRE127|_0_2821788	+
chr1	9188877	9188927	CRE129|_0_2821806	-
chr1	9188699	9188749	CRE129|_1_2821808	+
chr1	9188961	9189011	CRE129|_2_2821810	+
chr1	9188472	9188522	CRE129|_0_2821806	+
chr1	9189381	9189431	CRE129|_2_2821810	-
chr1	9189131	9189181	CRE129|_1_2821808	-
chr1	9203631	9203681	CRE130|_2_2821817	-
chr1	9203237	9203287	CRE130|_0_2821813	-
chr1	9203237	9203287	CRE130|_2_2821817	+
chr1	9203410	9203460	CRE130|_1_2821815	-
chr1	9203423	9203473	CRE130|_3_2821819	+
chr1	9203738	9203788	CRE130|_3_2821819	-
chr1	9223663	9223713	CRE131|_1_2661958	+
chr1	9224091	9224141	CRE131|_1_2661958	-
chr1	9223856	9223906	CRE131|_0_2661957	-
chr1	9223432	9223482	CRE131|_0_2661957	+
chr1	9223911	9223961	CRE131|_2_2661959	+
chr1	9224253	9224303	CRE131|_2_2661959	-
chr1	9294677	9294727	CRE132|_2_2821828	+
chr1	9294639	9294689	CRE132|_0_2661960	-
chr1	9294973	9295023	CRE132|_3_2821830	+
chr1	9294883	9294933	CRE132|_1_2821826	-
chr1	9294476	9294526	CRE132|_1_2821826	+
chr1	9295380	9295430	CRE132|_3_2821830	-
chr1	9294188	9294238	CRE132|_0_2661960	+
chr1	9295210	9295260	CRE132|_4_2821832	+
chr1	9295578	9295628	CRE132|_4_2821832	-
chr1	9295077	9295127	CRE132|_2_2821828	-
chr1	9339432	9339482	CRE133|_1_2821836	+
chr1	9339794	9339844	CRE133|_3_2821840	+
chr1	9339215	9339265	CRE133|_0_2661965	+
chr1	9340206	9340256	CRE133|_3_2821840	-
chr1	9339632	9339682	CRE133|_2_2821838	+
chr1	9339609	9339659	CRE133|_0_2661965	-
chr1	9339946	9339996	CRE133|_2_2821838	-
chr1	9339734	9339784	CRE133|_1_2821836	-
chr1	9460614	9460664	CRE134|_3_2821848	-
chr1	9459983	9460033	CRE134|_2_2821846	+
chr1	9460190	9460240	CRE134|_3_2821848	+
chr1	9459758	9459808	CRE134|_1_2821844	+
chr1	9460373	9460423	CRE134|_2_2821846	-
chr1	9459953	9460003	CRE134|_0_2661969	-
chr1	9460155	9460205	CRE134|_1_2821844	-
chr1	9459514	9459564	CRE134|_0_2661969	+
chr1	9489379	9489429	CRE135|_2_2821855	-
chr1	9488897	9488947	CRE135|_0_2821851	-
chr1	9488741	9488791	CRE135|_1_2821853	+
chr1	9488984	9489034	CRE135|_2_2821855	+
chr1	9489208	9489258	CRE135|_3_2821857	+
chr1	9489154	9489204	CRE135|_1_2821853	-
chr1	9599376	9599426	CRE136|_0_2661977	+
chr1	9599795	9599845	CRE136|_0_2661977	-
chr1	9599619	9599669	CRE136|_1_2661978	+
chr1	9599858	9599908	CRE136|_2_2661979	+
chr1	9600069	9600119	CRE136|_3_2661980	+
chr1	9600034	9600084	CRE136|_1_2661978	-
chr1	9600502	9600552	CRE136|_3_2661980	-
chr1	9600247	9600297	CRE136|_2_2661979	-
chr1	9648618	9648668	CRE137|_0_2821864	-
chr1	9649068	9649118	CRE137|_4_2821872	+
chr1	9649274	9649324	CRE137|_3_2821870	-
chr1	9648431	9648481	CRE137|_1_2821866	+
chr1	9649478	9649528	CRE137|_4_2821872	-
chr1	9648633	9648683	CRE137|_2_2821868	+
chr1	9649034	9649084	CRE137|_2_2821868	-
chr1	9648757	9648807	CRE137|_1_2821866	-
chr1	9690026	9690076	CRE138|_1_2821877	+
chr1	9690389	9690439	CRE138|_3_2821881	+
chr1	9690218	9690268	CRE138|_0_2821875	-
chr1	9689831	9689881	CRE138|_0_2821875	+
chr1	9690421	9690471	CRE138|_1_2821877	-
chr1	9690205	9690255	CRE138|_2_2821879	+
chr1	9711508	9711558	CRE139|_1_2821886	+
chr1	9711979	9712029	CRE139|_3_2821890	+
chr1	9711700	9711750	CRE139|_2_2821888	+
chr1	9711686	9711736	CRE139|_0_2821884	-
chr1	9711929	9711979	CRE139|_1_2821886	-
chr1	9712377	9712427	CRE139|_3_2821890	-
chr1	9712140	9712190	CRE139|_2_2821888	-
chr1	9713853	9713903	CRE140|_0_2661994	+
chr1	9714741	9714791	CRE140|_2_2661996	-
chr1	9714324	9714374	CRE140|_2_2661996	+
chr1	9714275	9714325	CRE140|_0_2661994	-
chr1	9714497	9714547	CRE140|_1_2661995	-
chr1	9714153	9714203	CRE140|_1_2661995	+
chr1	9747627	9747677	CRE141|_2_2821900	+
chr1	9747424	9747474	CRE141|_1_2821898	+
chr1	9747618	9747668	CRE141|_0_2821896	-
chr1	9748052	9748102	CRE141|_4_2821904	+
chr1	9747228	9747278	CRE141|_0_2821896	+
chr1	9748241	9748291	CRE141|_3_2821902	-
chr1	9748020	9748070	CRE141|_2_2821900	-
chr1	9748432	9748482	CRE141|_4_2821904	-
chr1	9747915	9747965	CRE141|_3_2821902	+
chr1	9778182	9778232	CRE142|_4_2821915	-
chr1	9777522	9777572	CRE142|_3_2821913	+
chr1	9777052	9777102	CRE142|_1_2821909	+
chr1	9777299	9777349	CRE142|_2_2821911	+
chr1	9777230	9777280	CRE142|_0_2821907	-
chr1	9778663	9778713	CRE142|_6_2821919	-
chr1	9777771	9777821	CRE142|_4_2821915	+
chr1	9777962	9778012	CRE142|_3_2821913	-
chr1	9777717	9777767	CRE142|_2_2821911	-
chr1	9777473	9777523	CRE142|_1_2821909	-
chr1	9776804	9776854	CRE142|_0_2821907	+
chr1	9778023	9778073	CRE142|_5_2821917	+
chr1	9778266	9778316	CRE142|_6_2821919	+
chr1	9778369	9778419	CRE142|_5_2821917	-
chr1	9847362	9847412	CRE143|_1_2662010	-
chr1	9847181	9847231	CRE143|_2_2662011	+
chr1	9847422	9847472	CRE143|_3_2662012	+
chr1	9846935	9846985	CRE143|_1_2662010	+
chr1	9847096	9847146	CRE143|_0_2662009	-
chr1	9846744	9846794	CRE143|_0_2662009	+
chr1	9883881	9883931	CRE144|_3_2821931	+
chr1	9883646	9883696	CRE144|_0_2662015	-
chr1	9883197	9883247	CRE144|_0_2662015	+
chr1	9883672	9883722	CRE144|_2_2821929	+
chr1	9884287	9884337	CRE144|_3_2821931	-
chr1	9883430	9883480	CRE144|_1_2662016	+
chr1	9883834	9883884	CRE144|_1_2662016	-
chr1	9884000	9884050	CRE144|_2_2821929	-
chr1	9953165	9953215	CRE145|_2_2821937	+
chr1	9953320	9953370	CRE145|_1_2821935	-
chr1	9953087	9953137	CRE145|_0_2662019	-
chr1	9953581	9953631	CRE145|_2_2821937	-
chr1	9952919	9952969	CRE145|_1_2821935	+
chr1	9952664	9952714	CRE145|_0_2662019	+
chr1	9961052	9961102	CRE146|_3_2821945	+
chr1	9961003	9961053	CRE146|_1_2821941	-
chr1	9960747	9960797	CRE146|_0_2662022	-
chr1	9960589	9960639	CRE146|_1_2821941	+
chr1	9961226	9961276	CRE146|_2_2821943	-
chr1	9960825	9960875	CRE146|_2_2821943	+
chr1	9961460	9961510	CRE146|_3_2821945	-
chr1	9970584	9970634	CRE147|_2_2821950	-
chr1	9971056	9971106	CRE147|_4_2821954	-
chr1	9969909	9969959	CRE147|_1_2821948	+
chr1	9970900	9970950	CRE147|_5_2821956	+
chr1	9970823	9970873	CRE147|_3_2821952	-
chr1	9970660	9970710	CRE147|_4_2821954	+
chr1	9971321	9971371	CRE147|_5_2821956	-
chr1	9969687	9969737	CRE147|_0_2662026	+
chr1	9971149	9971199	CRE147|_6_2821958	+
chr1	9970033	9970083	CRE147|_0_2662026	-
chr1	9970275	9970325	CRE147|_1_2821948	-
chr1	10003223	10003273	CRE148|_2_2662035	+
chr1	10003635	10003685	CRE148|_2_2662035	-
chr1	10003871	10003921	CRE148|_3_2662036	-
chr1	10003166	10003216	CRE148|_0_2662033	-
chr1	10002974	10003024	CRE148|_1_2662034	+
chr1	10002742	10002792	CRE148|_0_2662033	+
chr1	10003403	10003453	CRE148|_1_2662034	-
chr1	10003682	10003732	CRE148|_4_2662037	+
chr1	10003452	10003502	CRE148|_3_2662036	+
chr1	10011154	10011204	CRE149|_2_2821970	-
chr1	10010667	10010717	CRE149|_0_2821966	-
chr1	10011337	10011387	CRE149|_3_2821972	-
chr1	10010711	10010761	CRE149|_2_2821970	+
chr1	10010467	10010517	CRE149|_1_2821968	+
chr1	10010820	10010870	CRE149|_1_2821968	-
chr1	10021529	10021579	CRE150|_2_2662044	-
chr1	10021307	10021357	CRE150|_1_2662043	-
chr1	10021118	10021168	CRE150|_2_2662044	+
chr1	10021061	10021111	CRE150|_0_2662042	-
chr1	10020894	10020944	CRE150|_1_2662043	+
chr1	10020718	10020768	CRE150|_0_2662042	+
chr1	10092651	10092701	CRE151|_3_2821985	+
chr1	10092408	10092458	CRE151|_0_2821979	-
chr1	10093576	10093626	CRE151|_5_2821989	-
chr1	10093156	10093206	CRE151|_5_2821989	+
chr1	10092896	10092946	CRE151|_4_2821987	+
chr1	10092855	10092905	CRE151|_2_2821983	-
chr1	10093389	10093439	CRE151|_6_2821991	+
chr1	10093797	10093847	CRE151|_6_2821991	-
chr1	10092627	10092677	CRE151|_1_2821981	-
chr1	10092450	10092500	CRE151|_2_2821983	+
chr1	10093343	10093393	CRE151|_4_2821987	-
chr1	10093098	10093148	CRE151|_3_2821985	-
chr1	10092290	10092340	CRE151|_1_2821981	+
chr1	10250182	10250232	CRE152|_2_2821995	-
chr1	10250123	10250173	CRE152|_3_2821998	+
chr1	10271098	10271148	CRE153|_6_2822013	+
chr1	10271518	10271568	CRE153|_6_2822013	-
chr1	10270683	10270733	CRE153|_4_2822009	+
chr1	10270439	10270489	CRE153|_1_2822003	-
chr1	10270900	10270950	CRE153|_5_2822011	+
chr1	10271074	10271124	CRE153|_4_2822009	-
chr1	10270231	10270281	CRE153|_2_2822005	+
chr1	10270199	10270249	CRE153|_0_2822001	-
chr1	10271294	10271344	CRE153|_5_2822011	-
chr1	10270638	10270688	CRE153|_2_2822005	-
chr1	10269816	10269866	CRE153|_0_2822001	+
chr1	10270884	10270934	CRE153|_3_2822007	-
chr1	10270035	10270085	CRE153|_1_2822003	+
chr1	10270468	10270518	CRE153|_3_2822007	+
chr1	10458883	10458933	CRE154|_0_2662063	-
chr1	10459599	10459649	CRE154|_3_2662066	-
chr1	10458715	10458765	CRE154|_1_2662064	+
chr1	10459355	10459405	CRE154|_2_2662065	-
chr1	10459111	10459161	CRE154|_1_2662064	-
chr1	10458936	10458986	CRE154|_2_2662065	+
chr1	10458470	10458520	CRE154|_0_2662063	+
[truncated: 159,329 more rows]
