# Supplementary material for: Noncoding Variants Connect Enhancer Dysregulation with Nuclear Receptor Signaling in Hematopoietic Malignancies
Source: Oxford University Press journal article supplement (doi:10.1158/2159-8290.cd-19-1128), 2020-03-18
Supplement: 21598290cd191128-sup-229452_2_supp_6126674_q6fhv6.xlsx [file 21598290cd191128-sup-229452_2_supp_6126674_q6fhv6.xlsx]

## Sheet: Summary
AML or MDS	Lymphoma	ALL	Normal
HL60	SU-DHL-4	REH	CD34-HSPC-2008
THP1	SU-DHL-6	RCH-ACV	CD34-HSPC-2015
GDM1	SU-DHL-10	Kasumi-2	Ctrl-17
MV4-11	OCI-LY3	Jurkat	2990N
NB4	OCI-LY7	Loucy	3230N
U937	Toledo	HuT78	3255N
MKPL-1	Farage	3095	3348N
K562	U2932	3139	3491N
2990T	Ri-1	3175	3644N
3230T	Pfeiffer	3365	3236N
3255T	WSU-DLCL2	3373T	3496N
3348T	Karpas	3450T	3373N
3491T	Raji	3573	3450N
3644T	U266B1	3624	3678N
3678T	BC-2	4267	3938N
3710	3106	4409	3966N
3749	3101	4459	4143N
3753	3171	0100	4212N
3938T	3173	2966	4229N
3953	3208		4233N
3966T	3279		4274N
4009	3324		4293N
4143T	2949		4363N
4212T	3004		4404N
4229T			4467N
4233T			4528N
4245T			4535N
4274T			4696N
4293T			4715N
4358			4799N
4363T			4861N
4404T			4864N
4467T
4528T-CD34
4528T-CD14
4535T-CD34
4535T-CD14
4715T
4799T
4861T
4864T
0101
3236T-MDS
3496T-MDS
4696T-MDS
8 cell lines	15 cell lines	6 cell lines	2 normal samples
37 leukemia samples	9 leukemia samples	13 leukemia samples	1 mixed gDNA control
29 T/N pairs			29 matched normal controls
45 samples	24 samples	19 samples	32 samples	120
T/N are FACS-sorted samples with matched tumor/normal pair

## Sheet: Patient Samples
Patient ID	Sample ID	Leukemia subtype	Location	Age (Year)	Gender	Blast (%)
2990	WC004	AML	BM	53	M	0.28
3230	WC024	AML	PB	68	M	0.45
3236	WC025	MDS	BM	80	M	0.042
3255	WC026	AML	BM	61	M	0.62
3348	WC035	AML	PB	92	F	0.8
3491	WC046	AML	BM	78	F	0.68
3496	WC047	MDS	BM	69	M	0.081
3644	WC055	AML	BM	11	F	0.76
3678	WC058	AML	BM	68	F	0.08
3710	WC063	AML	BM	47	M	14% / 61%
3749	WC066	AML	BM	78	M	0.87
3753	WC065	AML	BM	69	M	0.35
3938	WC086	AML	BM	65	M	0.33
3953	WC091	AML	BM	14	F	14% / 28%
3966	WC092	AML	BM	60	M	0.32
4009	WC096	AML	BM	77	M	0.9
4143	WC109	AML	BM	48	F	0.6
4212	WC114	AML	PB	54	F	0.22
4229	WC115	AML	BM	63	F	0.43
4233	WC116	AML	PB	90	M	0.26
4245	WC118	AML	BM	70	M	0.69
4274	WC121	AML	PB	54	F	0.45
4293	WC122	AML	BM	5	M	0.74
4358	WC130	AML	BM	78	M	0.48
4363	WC128	AML	PB	27	F	0.27
4404	WC132	AML	BM	70	F	0.64
4467	WC137	AML	PB	4	F	0.8
4528	WC141	AML	PB	70	F	0.08
4535	WC142	AML	BM	70	F	0.073
4696	WC147	MDS	BM	58	M	0.067
4715	WC150	AML	PB	82	M	0.8
4799	WC151	AML	BM	54	M	0.55
4861	WC159	AML	BM	79	M	0.7
4864	WC157	AML	BM	8	M	0.21
0101	WC168	AML	PB	55	M	0.96
3101	WC013	Lymphoma	PB	83	F	43% / 3%
3106	WC010	Lymphoma	Tissue	70	F	0.36
3171	WC019	Lymphoma	BM	66	F	0.59
3173	WC020	Lymphoma	LN	61	F	0.38
3208	WC021	Lymphoma	LN	61	F	0.87
3279	WC031	Lymphoma	LN	69	F	0.55
3324	WC036	Lymphoma	Tissue	70	M	0.68
2949	WC001	Lymphoma	Tissue	58	M	0.69
3004	WC005	Lymphoma	BM	58	M	0.86
3095	WC011	B-ALL	PB	22	M	0.61
3139	WC015	B-ALL	BM	12	M	0.61
3175	WC023	B-ALL	BM	9	M	0.58
3365	WC037	B-ALL	BM	62	M	0.7
3373	WC039	B-ALL	PB	30	F	0.7
3450	WC042	B-ALL	BM	3	M	0.79
3573	WC048	B-ALL	PB	4	F	0.79
3624	WC054	B-ALL	PB	22 Months	F	0.38
4267	WC120	B-ALL	BM	14	M	0.95
4409	WC133	B-ALL	BM	5	F	0.28
4459	WC136	B-ALL	PB	43	F	0.82
0100	WC167	B-ALL	PB	4	M	0.72
2966	WC002	T-ALL	PB	12	M	0.9
PB: Peripheral blood
BM: Bone marrow
LN: lymph node
