# Supplementary material for: Noncoding Variants Connect Enhancer Dysregulation with Nuclear Receptor Signaling in Hematopoietic Malignancies
Source: Oxford University Press journal article supplement (doi:10.1158/2159-8290.cd-19-1128), 2020-03-18
Supplement: 21598290cd191128-sup-229452_2_supp_6126676_q6fh77.xlsx [file 21598290cd191128-sup-229452_2_supp_6126676_q6fh77.xlsx]

## Sheet: Sheet2
Name	Forward	Reverse	Application
sgRNApool_NGS_F1	AATGATACGGCGACCACCGAGATCT ACACTCTTTCCCTACACGACGCTCTTCCGATCTTAAGTAGAGTCTTGTGGAAAGGACGAAACACCG		sgRNA pooled screen_step2 primers with barcodes and staggers
sgRNApool_NGS_F2	AATGATACGGCGACCACCGAGATCTACACTCTTTCCCTACACGACGCTCTTCCGATCTATACACGATCTCTTGTGGAAAGGACGAAACACCG
sgRNApool_NGS_F3	AATGATACGGCGACCACCGAGATCTACACTCTTTCCCTACACGACGCTCTTCCGATCTGATCGCGCGGTTCTTGTGGAAAGGACGAAACACCG
sgRNApool_NGS_F4	AATGATACGGCGACCACCGAGATCTACACTCTTTCCCTACACGACGCTCTTCCGATCTCGATCATGATCGTCTTGTGGAAAGGACGAAACACCG
sgRNApool_NGS_F5	AATGATACGGCGACCACCGAGATCTACACTCTTTCCCTACACGACGCTCTTCCGATCTTCGATCGTTACCATCTTGTGGAAAGGACGAAACACCG
sgRNApool_NGS_F6	AATGATACGGCGACCACCGAGATCTACACTCTTTCCCTACACGACGCTCTTCCGATCTATCGATTCCTTGGTTCTTGTGGAAAGGACGAAACACCG
sgRNApool_NGS_F7	AATGATACGGCGACCACCGAGATCTACACTCTTTCCCTACACGACGCTCTTCCGATCTGATCGATAACGCATTTCTTGTGGAAAGGACGAAACACCG
sgRNApool_NGS_F8	AATGATACGGCGACCACCGAGATCTACACTCTTTCCCTACACGACGCTCTTCCGATCTCGATCGATACAGGTATTCTTGTGGAAAGGACGAAACACCG
sgRNApool_NGS_F9	AATGATACGGCGACCACCGAGATCTACACTCTTTCCCTACACGACGCTCTTCCGATCTACGATCGATAGGTAAGGTCTTGTGGAAAGGACGAAACACCG
sgRNApool_NGS_F10	AATGATACGGCGACCACCGAGATCTACACTCTTTCCCTACACGACGCTCTTCCGATCTTAACAATGGTCTTGTGGAAAGGACGAAACACCG
sgRNApool_NGS_F11	AATGATACGGCGACCACCGAGATCTACACTCTTTCCCTACACGACGCTCTTCCGATCTATACTGTATCTCTTGTGGAAAGGACGAAACACCG
sgRNApool_NGS_F12	AATGATACGGCGACCACCGAGATCTACACTCTTTCCCTACACGACGCTCTTCCGATCTGATAGGTCGCATCTTGTGGAAAGGACGAAACACCG
sgRNApool_NGS_F13	AATGATACGGCGACCACCGAGATCTACACTCTTTCCCTACACGACGCTCTTCCGATCTCGATCGGTTCAATCTTGTGGAAAGGACGAAACACCG
sgRNApool_NGS_F14	AATGATACGGCGACCACCGAGATCTACACTCTTTCCCTACACGACGCTCTTCCGATCTTCGATGCTGGATTTCTTGTGGAAAGGACGAAACACCG
sgRNApool_NGS_F15	AATGATACGGCGACCACCGAGATCTACACTCTTTCCCTACACGACGCTCTTCCGATCTATCGATTAACTCGGTCTTGTGGAAAGGACGAAACACCG
sgRNApool_NGS_F16	AATGATACGGCGACCACCGAGATCTACACTCTTTCCCTACACGACGCTCTTCCGATCTGATCGATTAACAGTTTCTTGTGGAAAGGACGAAACACCG
sgRNApool_NGS_R9	CAAGCAGAAGACGGCATACGAGATAAGTAGAGGTGACTGGAGTTCAGACGTGTGCTCTTCCGATCTtATTCCTCTCTGTTTAAAACTTTATC
sgRNApool_NGS_R10	CAAGCAGAAGACGGCATACGAGATACACGATCGTGACTGGAGTTCAGACGTGTGCTCTTCCGATCTATATTCCTCTCTGTTTAAAACTTTATC
sgRNApool_NGS_R11	CAAGCAGAAGACGGCATACGAGATCGCGCGGTGTGACTGGAGTTCAGACGTGTGCTCTTCCGATCTGATATTCCTCTCTGTTTAAAACTTTATC
sgRNApool_NGS_R12	CAAGCAGAAGACGGCATACGAGATCATGATCGGTGACTGGAGTTCAGACGTGTGCTCTTCCGATCTCGATATTCCTCTCTGTTTAAAACTTTATC
sgRNApool_NGS_R13	CAAGCAGAAGACGGCATACGAGATCGTTACCAGTGACTGGAGTTCAGACGTGTGCTCTTCCGATCTCGATCATTCCTCTCTGTTTAAAACTTTATC
sgRNApool_NGS_R14	CAAGCAGAAGACGGCATACGAGATTCCTTGGTGTGACTGGAGTTCAGACGTGTGCTCTTCCGATCTTATTCCTCTCTGTTTAAAACTTTATC
sgRNApool_NGS_R15	CAAGCAGAAGACGGCATACGAGATAACGCATTGTGACTGGAGTTCAGACGTGTGCTCTTCCGATCTATATTCCTCTCTGTTTAAAACTTTATC
Gal4_sgRNA	CACCGAACGACTAGTTAGGCGTGTA	AAACTACACGCCTAACTAGTCGTTC	sgRNAs for enhancer perturbation
CRE12661_sgRNA1	CACCGTTCAGCACCGCCGCCCCCCG	AAACCGGGGGGCGGCGGTGCTGAAC
CRE12661_sgRNA2	CACCGCACTGCAACCTCCGCCTCCT	AAACAGGAGGCGGAGGTTGCAGTGC
CRE12661_sgRNA3	CACCGCCCGCCAGAGGCGAGCCGCG	AAACCGCGGCTCGCCTCTGGCGGGC
CRE12661_sgRNA4	CACCGCTGGCTGATCGAGACCGTCC	AAACGGACGGTCTCGATCAGCCAGC
CRE4399_sgRNA1	CACCGCGAGGTTACGCCGCCCAATC	AAACGATTGGGCGGCGTAACCTCGC
CRE4399_sgRNA2	CACCGTTAGCGCTGCGCGCGTGAGG	AAACCCTCACGCGCGCAGCGCTAAC
CRE4399_sgRNA3	CACCGCAGTTAGCGCTGCGCGCGTG	AAACCACGCGCGCAGCGCTAACTGC
CRE18528_sgRNA	caccgCATGCGCCGGGGGTACGCCG	aaacCGGCGTACCCCCGGCGCATGc
CRE18532_sgRNA	caccgCGGGAGAATGGCGTGAACTC	aaacGAGTTCACGCCATTCTCCCGc
CRE19253_sgRNA	caccgCGTCCCAATTTCCGACTCAC	aaacGTGAGTCGGAAATTGGGACGc
CRE726_sgRNA	caccgCGAGAATTTTCTACGTTCCC	aaacGGGAACGTAGAAAATTCTCGc
CRE16157_sgRNA	caccgTGACGGGGTTGCGAGCGGCG	aaacCGCCGCTCGCAACCCCGTCAc
CRE9362_sgRNA	caccgTCGGAGCCGGGCGCGGTTTC	aaacGAAACCGCGCCCGGCTCCGAc
CRE11193_sgRNA	caccgCGCGACTGGCCCGATGCCGC	aaacGCGGCATCGGGCCAGTCGCGc
CRE17030_sgRNA	caccgACTGGGGGAGTTCGAGGCGG	aaacCCGCCTCGAACTCCCCCAGTc
CRE4896_sgRNA	caccgGTATCCCGGGAGAGGTCCGA	aaacTCGGACCTCTCCCGGGATACc
CRE2305_sgRNA	caccgTGGCGACCCCCGGCAACCTA	aaacTAGGTTGCCGGGGGTCGCCAc
CRE13899_sgRNA	caccgCGCCACCCGAACTAGAACGT	aaacACGTTCTAGTTCGGGTGGCGc
CRE9836_sgRNA	caccgATCACTGGCAGGTAGCCCCG	aaacCGGGGCTACCTGCCAGTGATc
CRE12661_del-sgRNA1	CACCGGAACTCTGGTGTCTCAAAGA	AAACTCTTTGAGACACCAGAGTTCC	sgRNAs for enhancer knockout
CRE12661_del-sgRNA2	CACCGGACCCCTTTACTTAGATTTT	AAACAAAATCTAAGTAAAGGGGTCC
CRE12661_del-sgRNA3	CACCGTACCACTTCTTGGTACCCCA	AAACTGGGGTACCAAGAAGTGGTAC
CRE12661_del-sgRNA4	CACCGCACCAAAACAACAGATCCTC	AAACGAGGATCTGTTGTTTTGGTGC
CRE4399_del-sgRNA1	CACCGCGTGAGCTCGCGCTAAACTA	AAACTAGTTTAGCGCGAGCTCACGC
CRE4399_del-sgRNA2	CACCGCACCAGCCGAGCATTCAGCG	AAACCGCTGAATGCTCGGCTGGTGC
CRE4399_del-sgRNA3	CACCGTCTTGGCTGTTAGCTTCCAT	AAACATGGAAGCTAACAGCCAAGAC
CRE4399_del-sgRNA4	CACCGAAACAGCTACCTTCAGAGGT	AAACACCTCTGAAGGTAGCTGTTTC
KRAS_KO-sgRNA1	CACCGCCAGTACATGAGGACTGGGG	AAACCCCCAGTCCTCATGTACTGGC	sgRNAs for KRAS knockout
KRAS_KO-sgRNA2	CACCGGTAGTTGGAGCTGGTGGCGT	AAACACGCCACCAGCTCCAACTACC
KRAS_KO-sgRNA3	CACCGAAGAGGAGTACAGTGCAATG	AAACCATTGCACTGTACTCCTCTTC
KRAS_KO-sgRNA4	CACCGGGACTCTGAAGATGTACCTA	AAACTAGGTACATCTTCAGAGTCCC
CRE4399_KI_sgRNA	CACCGCTTTTGCTTAAGACAAAGCC	AAACGGCTTTGTCTTAAGCAAAAGC	sgRNAs for enhancer variants knock-in
CRE12661_KI_sgRNA	CACCGGGGTCGGAACTACATCTCCC	AAACGGGAGATGTAGTTCCGACCCC
CRE12661_del	TGAAATGATACTTGTACTCCCCCTA	TCTTTCTACCTCATCGGCCATCCTC	genotyping primers for enhancer knockout
CRE12661_wt	TCCGGGTCCTGGCTCTCGGGTCA	AGCAATTCTCCTGCCTCAGCCTCC
CRE4399_del	ATTCTGTTTCACGTTTGTCCCTAAG	CAACTCTTATTTCCATTGCTGCCTC
CRE4399_wt	GAGATTCCTGATCCCTGGCTTTGTC	CGAGCGCCTGTAGTATTTATAGC
PPAR/RXR specific competitor	AAAAACTGGGCCAAAGGTCT	AGACCTTTGGCCCAGTTTTT	Biotin labeled oligos for ESMA
PPAR/RXR Non-specific competitor	GTCTTTCAGGGCAACAGTCA	TGACTGTTGCCCTGAAAGAC
Bio-E12661_wt	AAAACCAAAAATCTAAGTAAAGGGGTCGGAACTACATCT	AGATGTAGTTCCGACCCCTTTACTTAGATTTTTGGTTTT
Bio-E12661_mut	AAAACCCAAAAATCTAAGTAAAGGGGTCGGAACTACATCT	AGATGTAGTTCCGACCCCTTTACTTAGATTTTTGGGTTTT
Bio-E4399_wt	GGGGTCGGCTCAAACCTTCTGCCCCCTGCTCTTTTGAGA	TCTCAAAAGAGCAGGGGGCAGAAGGTTTGAGCCGACCCC
Bio-E4399_mut	GGGGTCGGCTCAAACCTTCTGCTCCCTGCTCTTTTGAGA	TCTCAAAAGAGCAGGGAGCAGAAGGTTTGAGCCGACCCC
CRE4399_KI_Donor	A*ACGGCGCCGCTCGGGGCTCCGATGGAGAGCCGGGGTGGGGTCGGCTCAAACCTTCTGCTCCCTGCTCTTTTGAGATTCCTGATCCATGGCTTTGTCTTAAGCAAAAGTACTGTAGAAGCTGCAGCG		ssDNA donor for enhancer variants knock-in
CRE12661_Donor	G*AGGAGCCGAGGCCTTGACCACGCCCCCTCCAGCCCCGCCCCGCCAGAGGCGAGCCGCGGGGCCTCGTGGGAGATGTAGTTCCGACCCCTTTACTTAGATTTTTGGgTTTTTTTTTTTTAA
CRE12661_KI_genotyping	ACCTGAGCTCGCTAGCGTGGTGTGCTTTGCAGGAGGACTTG	TCTTGATATCCTCGAGCTCTACTTCTAAGCCCTGCCTCCAC	genotyping primers for enhancer knock-in
CRE4399_KI_genotyping	ACCTGAGCTCGCTAGCTCGATTGAACGCCAAGATCATCAC	TCTTGATATCCTCGAGCGCCTGTAGTATTTATAGCTCG
ChIP-NC	AAACCCACGTCCAGCACAGTGTC	AATAGCGGGTAAGGATGTAGACAGG	ChIP-PCR primers
ChIP-PC	GTGTGTGCGGAGACGAGAGATC	TACAATAAATAGCAGCGCCTCCAG
ChIP-CRE4399	GCAGCTTCTACAGTACTTTTGC	AACGGCGCCGCTCGGGGCTCCGA
ChIP-CRE12661	AGAGGCGAGCCGCGGGGCCT	GAAGTTCTAATGTCTGTTAGCTA
PER2-RT	GACATGAGACCAACGAAAACTGC	AGGCTAAAGGTATCTGGACTCTG	RT-qPCR primers
KRAS-RT	ACAGAGAGTGGAGGATGCTTT	TTTCACACAGCCAGGAGTCTT
CASC1-RT	CTTAAATTCGGTGTAGCCACAGA	TGTGCCTTGGATTCTTCTTGAG
ETFRF1-RT	GACGAGACTATCCAAAAGGAGC	GCCCTGTGCAATAAGTTCTTTGA
LMNTD1-RT	GCACACTCAAACTACACTCAGAA	AAGAGAACTGGAGGTAAATTGGC
RASSF8-RT	AGTTCAGAGGATTGTTTGTGGAG	CACATCACTAGCATACTGCCC
HES6-RT	CTGAACTGAGTCAGGCTCCTGC	ACTCTGGCTGGCATTGGTCAC
ILKAP-RT	CTAGCAGTGGCGATTCAGGTT	TCACCGAAGAGGCTTTACAAAC
ERFE-RT	TGCTGACCCATCATCCGAATAGCTG	AGCCCTCCCAAGACCACCCTTTCTC
LOC643387-RT	AGCCAGGCCCATCGGATGATAACC	GACTTAGAATCCATGCTTGAG
PPARG-RT	GGGATCAGCTCCGTGGATCT	TGCACTTTGGTACTCTTGAAGTT
RXRA-RT	ATGGACACCAAACATTTCCTGC	GGGAGCTGATGACCGAGAAAG
GAPDH-RT	ACCCAGAAGACTGTGGATGG	TTCAGCTCAGGGATGACCTT
EIF2AK1-RT	ACCCCGAATATGACGAATCTGA	CAAGTGCTCCAGCAAAGAAAC
FAM220A-RT	GAGGTGACTCGGACAAACTATCA	CCACAGGCTTATTCATCCAGGA
LSM8-RT	ACATCAACCGAACTGTTGCC	CCAAATCAAGCGCAGAATCTGT
YIPF1-RT	ATATGTGCCACGTTGGTCTTT	CTGCTATGGACACTTTTCGGAA
DCTD-RT	TGCAAGAAACGGGACGACTAT	ATCACTGCACCCATTTGGCAT
DUS1L-RT	TGGCCCACGAGAAACTCTCT	GTACCTCACGGTCTTGTCAATC
ADAM17-RT	GTGGATGGTAAAAACGAAAGCG	GGCTAGAACCCTAGAGTCAGG
CLINT1-RT	CGAGAGGCAACGAACGATGAT	CCTTATGAGGTAAGCTAGGAGCA
CEP83-RT	ATGGTTGTCAGCACATTTACCG	GAACCTGTCAATCCACTGTCTC
PIP4K2A-RT	AAGAAGAAGCACTTCGTAGCG	ATGGCTCAGTTCATTGATCGAG
DDX17-RT	GATGTTTGTCCTAAACCCGTGT	CCAACGGAAATCCCTGGCA
UQCR11-RT	GCTGATCCTGGACTGGGTAC	CATAAGAAGCCTGAAGCTGAGCTG
