# Supplementary material for: Noncoding Variants Connect Enhancer Dysregulation with Nuclear Receptor Signaling in Hematopoietic Malignancies
Source: Oxford University Press journal article supplement (doi:10.1158/2159-8290.cd-19-1128), 2020-03-18
Supplement: 21598290cd191128-sup-229452_2_supp_6126677_q6fhc7.xlsx [file 21598290cd191128-sup-229452_2_supp_6126677_q6fhc7.xlsx]

## Sheet: CRE
CRE ID	Chromosome	Start	End
CRE1000	chr1	110026520	110027371
CRE10003	chr19	6862450	6863776
CRE10009	chr19	7197506	7198931
CRE10019	chr19	7586824	7588126
CRE10032	chr19	7933541	7934362
CRE10045	chr19	8385712	8386836
CRE10053	chr19	8578319	8579352
CRE10057	chr19	8942410	8943319
CRE10071	chr19	9937941	9939075
CRE10087	chr19	10415810	10416985
CRE10091	chr19	10490768	10491908
CRE10093	chr19	10612651	10613876
CRE10096	chr19	10676018	10676752
CRE10099	chr19	10763832	10764760
CRE10106	chr19	10958886	10959638
CRE10128	chr19	11545603	11546868
CRE10147	chr19	12163235	12164016
CRE10151	chr19	12266894	12268144
CRE10154	chr19	12443560	12444699
CRE10159	chr19	12605793	12606741
CRE10162	chr19	12721243	12722181
CRE10185	chr19	13047843	13050095
CRE10197	chr19	13278523	13279241
CRE102	chr1	6685008	6685794
CRE10212	chr19	13991049	13991931
CRE10223	chr19	14202075	14203169
CRE10235	chr19	14529114	14530962
CRE1024	chr1	111459321	111460222
CRE10245	chr19	14800494	14801325
CRE10259	chr19	15574397	15575216
CRE10263	chr19	15947114	15948450
CRE10268	chr19	16187272	16189797
CRE10288	chr19	16829898	16830848
CRE10290	chr19	16999622	17000382
CRE10293	chr19	17185745	17187130
CRE10311	chr19	17516063	17517293
CRE10323	chr19	17861852	17862722
CRE10325	chr19	17952909	17953722
CRE1034	chr1	111991233	111992707
CRE10344	chr19	18315036	18316190
CRE10346	chr19	18390364	18391240
CRE10357	chr19	18543465	18544664
CRE10362	chr19	18699060	18700404
CRE10369	chr19	19143717	19145249
CRE10378	chr19	19496470	19497572
CRE10392	chr19	19976653	19977762
CRE10393	chr19	20011277	20012341
CRE10398	chr19	20348480	20349495
CRE10399	chr19	20606464	20607764
CRE10400	chr19	20747733	20748908
CRE10401	chr19	20843739	20844648
CRE10402	chr19	20958792	20959937
CRE10412	chr19	21657435	21658167
CRE1042	chr1	112938200	112938952
CRE10427	chr19	23577405	23578533
CRE1044	chr1	113161400	113162235
CRE10446	chr19	28283468	28285290
CRE10450	chr19	29703239	29704051
CRE10458	chr19	30432734	30433991
CRE10476	chr19	34624948	34625930
CRE10488	chr19	35167948	35168968
CRE10489	chr19	35224700	35225570
CRE10496	chr19	35528689	35529429
CRE105	chr1	6844088	6845159
CRE10503	chr19	35758340	35759783
CRE10512	chr19	36119217	36120379
CRE10516	chr19	36207993	36209382
CRE10526	chr19	36485611	36486729
CRE10529	chr19	36544868	36546513
CRE10552	chr19	37742590	37743306
CRE1056	chr1	114413693	114415456
CRE10567	chr19	38396963	38398225
CRE10613	chr19	39902982	39904073
CRE10626	chr19	40561373	40562664
CRE10630	chr19	40853902	40854893
CRE10632	chr19	40926687	40927456
CRE10635	chr19	40949170	40950052
CRE10640	chr19	41082135	41083323
CRE10654	chr19	41815574	41816573
CRE10659	chr19	41902954	41904079
CRE10667	chr19	42038174	42038892
CRE10692	chr19	42758031	42759206
CRE10703	chr19	43967495	43968644
CRE10705	chr19	44007743	44009175
CRE10721	chr19	44405461	44406641
CRE1073	chr1	116518499	116519847
CRE10782	chr19	46194658	46195392
CRE10793	chr19	46389076	46390572
CRE10794	chr19	46405286	46406774
CRE10805	chr19	47219962	47220941
CRE10815	chr19	47551019	47552155
CRE10817	chr19	47614537	47615272
CRE10819	chr19	47616477	47617214
CRE10836	chr19	48613508	48614372
CRE10852	chr19	48972317	48973305
CRE10853	chr19	48983516	48984475
CRE10863	chr19	49141059	49141976
CRE10866	chr19	49217072	49218297
CRE10876	chr19	49389348	49390121
CRE1088	chr1	117664016	117665074
CRE10880	chr19	49457917	49459084
CRE10888	chr19	49660830	49661580
CRE10895	chr19	49990029	49991519
CRE10897	chr19	50015872	50016992
CRE10904	chr19	50179089	50180234
CRE10907	chr19	50269026	50270905
CRE10909	chr19	50321205	50322119
CRE10913	chr19	50379407	50381413
CRE10917	chr19	50432302	50433218
CRE10923	chr19	50860281	50861408
CRE10927	chr19	50886948	50888124
CRE10929	chr19	50934626	50935669
CRE10952	chr19	52390503	52391449
CRE10959	chr19	52598246	52599280
CRE10962	chr19	52693050	52693855
CRE10966	chr19	52872922	52873828
CRE10967	chr19	52900684	52901694
CRE10972	chr19	53140663	53141859
CRE10973	chr19	53193056	53194503
CRE10991	chr19	53897962	53899271
CRE11013	chr19	54975062	54976250
CRE11054	chr19	56631194	56633139
CRE11071	chr19	57751453	57752744
CRE11075	chr19	57874188	57875399
CRE11079	chr19	57988493	57989303
CRE11102	chr19	58513655	58514626
CRE11105	chr19	58661525	58662717
CRE11106	chr19	58665819	58666810
CRE11124	chr19	59024922	59026283
CRE11152	chr2	3383257	3384089
CRE11191	chr2	9614242	9615421
CRE11193	chr2	9695628	9696614
CRE11207	chr2	10587308	10589628
CRE11236	chr2	17934580	17935847
CRE11242	chr2	20189393	20190373
CRE11256	chr2	24149445	24150657
CRE11264	chr2	24582698	24583989
CRE11274	chr2	25508401	25509524
CRE11288	chr2	26256149	26257733
CRE11289	chr2	26266948	26267883
CRE11298	chr2	26986796	26987658
CRE11314	chr2	27631829	27633103
CRE11320	chr2	27979836	27980551
CRE11346	chr2	30454219	30455011
CRE11359	chr2	32489424	32490140
CRE1138	chr1	145209066	145210058
CRE11383	chr2	37851236	37851984
CRE11386	chr2	37898839	37899616
CRE11401	chr2	39005127	39006289
CRE11402	chr2	39033249	39034050
CRE11409	chr2	39663348	39664636
CRE11424	chr2	42794742	42795460
CRE11425	chr2	42795821	42796846
CRE11453	chr2	44588144	44589233
CRE11457	chr2	45837644	45838873
CRE11462	chr2	46413974	46414966
CRE11476	chr2	47403198	47404371
CRE11477	chr2	47426042	47426904
CRE11482	chr2	47596590	47597302
CRE11488	chr2	48009481	48010738
CRE11509	chr2	54342195	54343104
CRE11531	chr2	57986960	57987701
CRE11535	chr2	58467823	58468988
CRE11550	chr2	61108257	61109089
CRE11563	chr2	61990869	61991991
CRE11583	chr2	64067994	64068916
CRE11587	chr2	64370009	64371789
CRE11594	chr2	64680654	64681972
CRE1161	chr1	146696609	146697700
CRE11616	chr2	65356335	65357520
CRE11619	chr2	65454438	65455887
CRE11620	chr2	65617244	65618238
CRE11635	chr2	68591845	68592999
CRE11646	chr2	69135035	69136398
CRE11647	chr2	69240269	69240999
CRE11652	chr2	69870283	69871432
CRE1166	chr1	147141824	147143056
CRE11662	chr2	70313135	70314159
CRE11663	chr2	70322055	70322928
CRE11697	chr2	73460380	73462062
CRE11702	chr2	73815309	73816036
CRE1172	chr1	147735469	147736468
CRE11728	chr2	74780878	74782509
CRE11736	chr2	75185312	75186150
CRE11737	chr2	75873475	75874413
CRE11749	chr2	85132395	85133594
CRE11759	chr2	85645336	85646415
CRE11761	chr2	85765304	85766647
CRE11765	chr2	85822156	85823207
CRE11774	chr2	86262562	86264318
CRE11782	chr2	86849783	86851026
CRE11822	chr2	95726827	95727973
CRE11876	chr2	99757535	99758724
CRE11892	chr2	101821502	101822432
CRE11894	chr2	101868768	101870391
CRE11895	chr2	101924653	101925736
CRE11936	chr2	109150167	109151338
CRE11974	chr2	112852380	112853101
CRE12013	chr2	118770980	118771904
CRE12026	chr2	120436342	120437354
CRE12028	chr2	120770155	120771087
CRE12035	chr2	122287912	122288761
CRE12038	chr2	122456940	122458026
CRE12050	chr2	128283546	128284790
CRE12073	chr2	131484520	131485385
CRE12074	chr2	131555027	131555909
CRE12107	chr2	136874745	136875712
CRE12109	chr2	136893485	136895271
CRE12110	chr2	137003317	137004193
CRE12122	chr2	144560371	144561231
CRE12145	chr2	152684431	152685501
CRE12149	chr2	153574105	153575086
CRE12157	chr2	157198170	157199034
CRE12164	chr2	158309617	158310503
CRE12168	chr2	158732139	158733051
CRE12169	chr2	159071068	159071776
CRE12175	chr2	160372325	160373353
CRE1218	chr1	150158940	150159684
CRE12192	chr2	162849098	162849977
CRE122	chr1	8877119	8878266
CRE12234	chr2	172290514	172291369
CRE12247	chr2	173940091	173941635
CRE12249	chr2	174218836	174220143
CRE1225	chr1	150265803	150266742
CRE12262	chr2	176032042	176033146
CRE12263	chr2	176045539	176046959
CRE12270	chr2	178029310	178030404
CRE12272	chr2	178129377	178130456
CRE12278	chr2	178482932	178484100
CRE12282	chr2	179315162	179316456
CRE1230	chr1	150534033	150534868
CRE12300	chr2	182322576	182323679
CRE12310	chr2	185463309	185464250
CRE12329	chr2	191272143	191273866
CRE12334	chr2	191745801	191746899
CRE12348	chr2	196352067	196353079
CRE12349	chr2	196397447	196398169
CRE12352	chr2	196424405	196425144
CRE12359	chr2	196977629	196978710
CRE12366	chr2	197583427	197584586
CRE12367	chr2	197663647	197664815
CRE12382	chr2	198505266	198506045
CRE12402	chr2	201577514	201578734
CRE12404	chr2	201676026	201677223
CRE12428	chr2	203499537	203500391
CRE1243	chr1	151118617	151119720
CRE12435	chr2	204192498	204193785
CRE12448	chr2	206949953	206951285
CRE1245	chr1	151137838	151139325
CRE12458	chr2	208393864	208396065
CRE12459	chr2	208489121	208490030
CRE12463	chr2	208575447	208577038
CRE12465	chr2	208889853	208890891
CRE12475	chr2	213551442	213552152
CRE12490	chr2	216945862	216946760
CRE12493	chr2	217276568	217277720
CRE12498	chr2	217557433	217558141
CRE12502	chr2	218990178	218990892
CRE1251	chr1	151318849	151320002
CRE12525	chr2	220042083	220043315
CRE1254	chr1	151445509	151446426
CRE12550	chr2	224701436	224702720
CRE12556	chr2	225795025	225795782
CRE12572	chr2	230876861	230877574
CRE12576	chr2	231191354	231192212
CRE12589	chr2	231921255	231922196
CRE12626	chr2	234239830	234241018
CRE1263	chr1	151762417	151764092
CRE12644	chr2	236574809	236575523
CRE12661	chr2	239142836	239143619
CRE1268	chr1	152432052	152433139
CRE12720	chr20	361434	362406
CRE12732	chr20	1373054	1373903
CRE12746	chr20	2504964	2505927
CRE12748	chr20	2633272	2634162
CRE12752	chr20	2853245	2855121
CRE12759	chr20	3219649	3220846
CRE12760	chr20	3387632	3389170
CRE12782	chr20	4700794	4701999
CRE12787	chr20	4803596	4804302
CRE12804	chr20	5930460	5931826
CRE12808	chr20	8112702	8113646
CRE1281	chr1	153755462	153756511
CRE12818	chr20	10485015	10485743
CRE12820	chr20	10594030	10594833
CRE12821	chr20	10654505	10655683
CRE1283	chr1	153894884	153896558
CRE12833	chr20	17948571	17950391
CRE12896	chr20	29611227	29612554
CRE12902	chr20	30134738	30135638
CRE12909	chr20	30310424	30311456
CRE12921	chr20	30945235	30946936
CRE12953	chr20	32890310	32891529
CRE12956	chr20	33103957	33105134
CRE12983	chr20	34541608	34542498
CRE12987	chr20	35089019	35090362
CRE1299	chr1	154530561	154532039
CRE13004	chr20	35806947	35807990
CRE13016	chr20	37075089	37075998
CRE13017	chr20	37100842	37102061
CRE13021	chr20	37433011	37434414
CRE13038	chr20	39766612	39767631
CRE13047	chr20	42085962	42087144
CRE13058	chr20	42838550	42840332
CRE13077	chr20	44001876	44002934
CRE13091	chr20	44746280	44747763
CRE1310	chr1	155035839	155036836
CRE13151	chr20	49434491	49435193
CRE13154	chr20	50077542	50078317
CRE13169	chr20	52268513	52269384
CRE13172	chr20	52294024	52294985
CRE13176	chr20	52463844	52464552
CRE13179	chr20	52531957	52532936
CRE13181	chr20	52565112	52566281
CRE13191	chr20	55926010	55927004
CRE13209	chr20	57227278	57228119
CRE13231	chr20	60696209	60697388
CRE13252	chr20	61584652	61585680
CRE13266	chr20	62257547	62258976
CRE13271	chr20	62284763	62285532
CRE1328	chr1	155657672	155658918
CRE13291	chr20	62708617	62709947
CRE13314	chr21	15754903	15756699
CRE13328	chr21	17681753	17682604
CRE13329	chr21	18983836	18985426
CRE13332	chr21	20229765	20230469
CRE13343	chr21	27011226	27012138
CRE13356	chr21	30391172	30392325
CRE13388	chr21	34638245	34639179
CRE13393	chr21	34851383	34852265
CRE13394	chr21	34852278	34853000
CRE13396	chr21	34914549	34915389
CRE13401	chr21	35320268	35321364
CRE13402	chr21	35347930	35349067
CRE13414	chr21	36261257	36262671
CRE13418	chr21	36420488	36421577
CRE13430	chr21	37545693	37546851
CRE13452	chr21	39847899	39848605
CRE1346	chr1	156264767	156265737
CRE1347	chr1	156307455	156308714
CRE13473	chr21	40817244	40818269
CRE13476	chr21	42733540	42734753
CRE13504	chr21	44298922	44300181
CRE13514	chr21	44766079	44766829
CRE13528	chr21	45274527	45275364
CRE13529	chr21	45285363	45286349
CRE13556	chr21	46707360	46708282
CRE13569	chr21	47648944	47649952
CRE1357	chr1	156710146	156710897
CRE13570	chr21	47705720	47706953
CRE1360	chr1	156736233	156737192
CRE13635	chr22	20099076	20100149
CRE13638	chr22	20193642	20194576
CRE13645	chr22	20747916	20748772
CRE1365	chr1	157107437	157108795
CRE13650	chr22	21212050	21213883
CRE13663	chr22	21983495	21984551
CRE13689	chr22	23558749	23559589
CRE13703	chr22	24199341	24200563
CRE13715	chr22	24833445	24834157
CRE13733	chr22	26690227	26691278
CRE13744	chr22	27529742	27530471
CRE13748	chr22	28314811	28316042
CRE13751	chr22	29137218	29138651
CRE13755	chr22	29206971	29207801
CRE13763	chr22	29783890	29785296
CRE1377	chr1	158119222	158120081
CRE13784	chr22	30701760	30703230
CRE13796	chr22	31476679	31477414
CRE13804	chr22	31742030	31743305
CRE13851	chr22	36902696	36903729
CRE13867	chr22	37639522	37640499
CRE13897	chr22	38796320	38797029
CRE13899	chr22	38901807	38903145
CRE13903	chr22	39077287	39078665
CRE13941	chr22	40719992	40720803
CRE13953	chr22	41214969	41215813
CRE13968	chr22	41843001	41844534
CRE13991	chr22	42792821	42793626
CRE13998	chr22	43010355	43011775
CRE140	chr1	9713960	9714674
CRE14001	chr22	43252345	43253345
CRE14003	chr22	43410666	43411722
CRE14030	chr22	45636199	45637592
CRE14033	chr22	45808458	45810378
CRE14035	chr22	46148855	46149636
CRE14041	chr22	46453388	46454310
CRE14042	chr22	46525233	46526000
CRE14046	chr22	46691921	46692837
CRE14060	chr22	47186853	47187670
CRE14073	chr22	50247692	50248474
CRE14077	chr22	50329505	50330760
CRE14080	chr22	50355104	50355901
CRE14083	chr22	50523251	50524125
CRE1411	chr1	160492534	160493300
CRE14111	chr22	51066162	51067244
CRE14128	chr3	4626141	4626874
CRE14129	chr3	4792714	4793851
CRE14130	chr3	4872078	4873712
CRE14134	chr3	5068127	5068947
CRE14147	chr3	9439456	9440590
CRE1415	chr1	160598538	160599921
CRE14151	chr3	9791181	9792267
CRE14167	chr3	10283701	10284898
CRE1417	chr1	160681271	160682133
CRE14170	chr3	10361912	10363041
CRE14176	chr3	11642979	11644270
CRE14181	chr3	12525040	12526524
CRE14195	chr3	13460798	13461984
CRE14234	chr3	16592268	16593008
CRE14243	chr3	17783131	17784969
CRE14250	chr3	18059631	18061223
CRE14254	chr3	18168526	18169267
CRE14262	chr3	19187962	19189328
CRE14273	chr3	23244178	23245466
CRE14287	chr3	27391058	27391829
CRE14293	chr3	27763171	27764188
CRE14300	chr3	30647678	30648685
CRE14310	chr3	32433219	32434375
CRE14311	chr3	32442537	32443667
CRE14314	chr3	32508742	32509725
CRE14328	chr3	34057974	34059998
CRE14368	chr3	40759843	40760575
CRE14380	chr3	42705321	42706477
CRE14398	chr3	44379282	44380554
CRE14408	chr3	44770633	44771501
CRE14409	chr3	44802418	44804213
CRE1441	chr1	161329196	161330035
CRE14414	chr3	45208780	45209592
CRE14415	chr3	45429591	45430750
CRE14423	chr3	45717837	45718732
CRE14425	chr3	45883124	45884128
CRE14447	chr3	47204544	47205535
CRE14451	chr3	47462518	47463627
CRE14464	chr3	48249538	48250343
CRE14475	chr3	48520051	48521182
CRE14491	chr3	49131218	49132078
CRE14492	chr3	49141612	49142656
CRE14507	chr3	49506890	49508735
CRE14530	chr3	50358455	50359472
CRE14559	chr3	52287430	52288196
CRE14560	chr3	52311857	52313078
CRE1458	chr1	161931716	161932475
CRE14590	chr3	56627787	56628754
CRE14603	chr3	57741420	57742382
CRE14625	chr3	61545822	61546995
CRE14627	chr3	62859456	62860257
CRE14636	chr3	66024023	66025157
CRE14656	chr3	71440688	71441733
CRE14657	chr3	71492956	71494512
CRE14666	chr3	72495365	72496526
CRE14682	chr3	75834040	75835028
CRE14732	chr3	98620035	98621577
CRE1475	chr1	165819904	165821382
CRE14784	chr3	111055703	111056476
CRE14789	chr3	111851435	111852351
CRE14818	chr3	117715940	117716651
CRE14834	chr3	119813927	119815310
CRE14835	chr3	120067517	120068748
CRE14837	chr3	120277271	120278133
CRE14843	chr3	121264171	121265883
CRE14853	chr3	122232987	122233813
CRE14866	chr3	123476177	123476980
CRE14876	chr3	125238370	125239492
CRE14893	chr3	127309124	127310432
CRE14906	chr3	128368773	128369731
CRE1491	chr1	167190582	167191769
CRE14918	chr3	128839413	128840171
CRE14926	chr3	129117653	129118826
CRE14928	chr3	129244287	129245214
CRE14929	chr3	129295670	129297530
CRE14984	chr3	137905865	137907051
CRE14988	chr3	138327343	138328422
CRE1499	chr1	167522230	167523287
CRE14992	chr3	138609592	138610383
CRE14993	chr3	138634299	138635194
CRE14998	chr3	140660080	140661814
CRE15017	chr3	142166365	142167225
CRE15028	chr3	142935167	142935980
CRE15039	chr3	146186712	146187867
CRE15055	chr3	150212716	150213422
CRE15075	chr3	151985875	151987917
CRE151	chr1	10092102	10093737
CRE15114	chr3	160116863	160117590
CRE15120	chr3	160472668	160473463
CRE15133	chr3	167451811	167453572
CRE15139	chr3	169489617	169490531
CRE15163	chr3	172194631	172195754
CRE15170	chr3	174158540	174159578
CRE15174	chr3	176913706	176914750
CRE15178	chr3	177077869	177078705
CRE15182	chr3	177315113	177316053
CRE15198	chr3	179985032	179985739
CRE15205	chr3	182511617	182512456
CRE15209	chr3	182879849	182880865
CRE15215	chr3	183353418	183354858
CRE15226	chr3	184016168	184017712
CRE15228	chr3	184053272	184054353
CRE15229	chr3	184080541	184081689
CRE15245	chr3	185655067	185656025
CRE15256	chr3	186501044	186501981
CRE15264	chr3	187462174	187463002
CRE15272	chr3	187871255	187872821
CRE15295	chr3	193859290	193860013
CRE15298	chr3	194276829	194277964
CRE15299	chr3	194304279	194305231
CRE153	chr1	10269924	10271441
CRE15301	chr3	194392737	194393760
CRE15320	chr3	195636551	195637313
CRE15332	chr3	196014169	196015349
CRE15333	chr3	196044566	196045660
CRE15334	chr3	196158465	196159347
CRE15336	chr3	196255216	196256410
CRE15355	chr3	197281089	197282593
CRE15365	chr3	197807062	197808161
CRE15384	chr4	774868	776706
CRE15386	chr4	925395	926355
CRE1541	chr1	171809993	171810739
CRE15418	chr4	2242985	2243988
CRE15424	chr4	2470846	2472102
CRE15425	chr4	2537078	2538200
CRE15432	chr4	2813448	2814619
CRE15455	chr4	6185495	6186214
CRE1546	chr1	172412339	172413495
CRE15463	chr4	6675152	6676676
CRE15464	chr4	6710801	6711800
CRE15480	chr4	8169111	8170256
CRE15487	chr4	8535505	8536226
CRE15492	chr4	9692867	9693706
CRE15498	chr4	10118540	10119697
CRE15501	chr4	10705932	10706674
CRE1552	chr1	172875741	172876558
CRE15528	chr4	20701476	20702516
CRE15531	chr4	23335767	23336733
CRE15553	chr4	36245232	36246246
CRE15562	chr4	37827669	37828705
CRE1557	chr1	173445818	173447122
CRE15597	chr4	40057290	40058253
CRE15602	chr4	40309162	40310305
CRE15606	chr4	40552794	40553798
CRE15613	chr4	41992003	41993183
CRE15619	chr4	47012632	47013574
CRE15623	chr4	47486910	47488136
CRE15658	chr4	53588105	53589237
CRE1566	chr1	174959249	174960287
CRE15661	chr4	54243370	54244449
CRE15662	chr4	54929927	54930964
CRE15663	chr4	55338855	55339573
CRE15664	chr4	55437603	55438392
CRE15665	chr4	55524493	55525380
CRE15666	chr4	55685680	55686394
CRE15678	chr4	56915391	56916341
CRE15683	chr4	57623392	57624496
CRE15687	chr4	57976115	57977316
CRE15699	chr4	68566128	68567501
CRE15722	chr4	73934071	73935673
CRE15745	chr4	76911162	76912330
CRE15749	chr4	77870124	77870837
CRE15753	chr4	78114606	78115714
CRE15757	chr4	78783268	78784330
CRE15775	chr4	81256260	81257032
CRE15785	chr4	83294513	83295364
CRE15787	chr4	83350748	83352002
CRE1579	chr1	178380676	178381793
CRE15792	chr4	83934085	83934814
CRE15840	chr4	90850452	90851494
CRE15863	chr4	100737839	100738774
CRE15876	chr4	103421944	103423397
CRE15878	chr4	103748167	103749251
CRE15902	chr4	107629151	107629921
CRE1592	chr1	179334231	179335393
CRE15925	chr4	110736394	110737493
CRE1593	chr1	179783689	179784663
CRE15936	chr4	113206001	113207502
CRE15954	chr4	119756428	119757748
CRE15960	chr4	120987496	120988961
CRE15962	chr4	122102843	122103913
CRE15963	chr4	122617501	122618628
CRE15968	chr4	123072953	123074042
CRE15983	chr4	125633345	125634525
CRE16003	chr4	134065348	134066125
CRE16005	chr4	139120602	139121310
CRE16007	chr4	139409505	139410233
CRE16010	chr4	140004184	140005595
CRE16024	chr4	141347849	141349023
CRE16025	chr4	141445012	141446122
CRE16028	chr4	141677432	141678382
CRE16030	chr4	142141793	142142913
CRE16075	chr4	153700439	153701647
CRE16077	chr4	154169944	154170990
CRE16090	chr4	155471016	155472135
CRE16091	chr4	156297242	156298055
CRE16093	chr4	156679466	156680603
CRE16100	chr4	159593272	159594085
CRE16106	chr4	164415276	164416481
CRE16111	chr4	166033109	166034184
CRE16130	chr4	170678274	170679372
CRE16143	chr4	176867777	176868491
CRE16157	chr4	183837553	183839385
CRE1616	chr1	182360389	182361738
CRE16162	chr4	184424696	184425555
CRE16164	chr4	184579529	184581232
CRE16166	chr4	185188800	185189993
CRE16184	chr4	187548712	187549457
CRE16213	chr5	980626	981331
CRE16241	chr5	6377783	6378886
CRE16259	chr5	14108597	14109330
CRE16285	chr5	21830967	21831960
CRE16300	chr5	32174006	32174958
CRE16334	chr5	36876008	36877853
CRE1634	chr1	184715454	184716222
CRE16342	chr5	38659891	38660719
CRE16355	chr5	40678875	40679834
CRE16377	chr5	43482958	43484727
CRE16378	chr5	43514760	43515774
CRE16429	chr5	55965640	55966670
CRE16440	chr5	57755739	57756914
CRE16443	chr5	58055423	58056438
CRE16453	chr5	60615163	60615937
CRE16456	chr5	60704033	60704792
CRE16459	chr5	61708010	61709223
CRE16465	chr5	64778485	64779267
CRE16467	chr5	64919834	64921246
CRE16474	chr5	65916744	65917486
CRE16486	chr5	67583832	67584852
CRE16488	chr5	68006941	68007938
CRE16490	chr5	68389597	68390778
CRE16492	chr5	68484914	68486143
CRE16545	chr5	75012472	75013718
CRE1655	chr1	189960928	189961703
CRE16555	chr5	76787352	76788356
CRE16559	chr5	77655796	77656932
CRE16564	chr5	78429419	78430199
CRE16579	chr5	79950451	79951396
CRE16588	chr5	81267215	81268351
CRE16596	chr5	82372839	82373898
CRE16614	chr5	87798136	87799215
CRE16618	chr5	88178388	88179214
CRE1668	chr1	194194983	194196050
CRE16681	chr5	100236635	100237718
CRE16687	chr5	102897730	102898723
CRE16694	chr5	108063370	108064442
CRE16697	chr5	108745930	108746749
CRE16712	chr5	111092259	111094313
CRE1673	chr1	197237131	197237851
CRE16763	chr5	122561653	122562488
CRE16769	chr5	124083143	124084254
CRE16775	chr5	125785256	125786320
CRE16777	chr5	125936235	125937441
CRE16780	chr5	126093899	126094625
CRE16790	chr5	127418065	127419418
CRE16792	chr5	128429527	128431128
CRE16797	chr5	130499953	130501364
CRE16805	chr5	131132033	131133442
CRE16812	chr5	131831002	131832006
CRE16819	chr5	132201631	132202756
CRE16832	chr5	133706782	133707687
CRE16835	chr5	133801215	133802312
CRE16837	chr5	133860217	133861043
CRE16842	chr5	134181227	134182622
CRE16858	chr5	137513747	137514901
CRE16861	chr5	137673186	137674464
CRE16873	chr5	138677321	138678685
CRE16876	chr5	138739260	138740356
CRE16891	chr5	139486710	139487679
CRE16896	chr5	139780550	139781952
CRE16907	chr5	140105077	140105796
CRE16920	chr5	141302710	141303889
CRE16923	chr5	141392121	141393217
CRE16932	chr5	142178165	142178877
CRE16937	chr5	142608953	142610082
CRE16950	chr5	147161553	147162744
CRE16992	chr5	150617428	150618217
CRE16993	chr5	150631401	150632504
CRE17008	chr5	154133699	154134731
CRE17010	chr5	154237225	154238085
CRE17018	chr5	156369011	156369932
CRE17030	chr5	157285355	157286187
CRE17036	chr5	158526145	158526985
CRE17047	chr5	159826676	159827513
CRE17048	chr5	159845481	159847278
CRE17054	chr5	162806155	162807331
CRE17058	chr5	162930823	162931998
CRE17079	chr5	170813925	170815506
CRE1708	chr1	200500102	200500898
CRE17094	chr5	172204602	172205406
CRE17101	chr5	172484209	172485044
CRE1712	chr1	200707852	200709045
CRE17136	chr5	176784705	176785680
CRE17170	chr5	178976949	178978409
CRE17200	chr5	180618654	180619529
CRE17207	chr6	292100	293175
CRE17216	chr6	1482644	1483421
CRE17224	chr6	2726074	2726819
CRE17226	chr6	2764661	2766256
CRE17233	chr6	2875435	2876320
CRE1724	chr1	202128572	202129788
CRE17242	chr6	3068442	3069782
CRE17295	chr6	7312852	7313927
CRE17302	chr6	8064039	8065222
CRE17303	chr6	8101933	8103039
CRE17311	chr6	10694302	10695424
CRE17314	chr6	10747390	10748494
CRE17320	chr6	11525541	11526280
CRE17322	chr6	11778525	11779294
CRE17348	chr6	14117359	14118767
CRE17388	chr6	18330083	18330886
CRE17392	chr6	20206628	20207658
CRE17405	chr6	21587908	21589799
CRE17433	chr6	25041638	25042477
CRE17437	chr6	25138207	25139170
CRE17440	chr6	25278955	25280086
CRE17445	chr6	25992113	25993253
CRE17446	chr6	26020874	26022499
CRE17447	chr6	26026825	26027944
CRE17450	chr6	26056543	26057633
CRE17455	chr6	26155785	26157032
CRE17460	chr6	26204791	26205507
CRE17466	chr6	26240145	26241393
CRE17469	chr6	26284797	26285835
CRE175	chr1	11865359	11866764
CRE17502	chr6	27470012	27470721
CRE17512	chr6	27791193	27792839
CRE17516	chr6	27862168	27863606
CRE17527	chr6	28248845	28250016
CRE1755	chr1	204255738	204256612
CRE17649	chr6	33588902	33589814
CRE1767	chr1	205282185	205283054
CRE17684	chr6	35986220	35986949
CRE17694	chr6	36739534	36740435
CRE17695	chr6	36795223	36796073
CRE177	chr1	11967909	11968967
CRE17705	chr6	37069641	37071118
CRE17707	chr6	37137865	37138629
CRE17708	chr6	37138890	37140058
CRE17713	chr6	37282023	37282794
CRE17716	chr6	37410049	37411023
CRE17743	chr6	41673311	41674775
CRE17766	chr6	42694078	42695148
CRE17776	chr6	42946344	42947523
CRE17780	chr6	43021092	43022012
CRE17781	chr6	43026701	43027956
CRE178	chr1	11986042	11986993
CRE17812	chr6	44214235	44215596
CRE17817	chr6	44355141	44356082
CRE17822	chr6	45167081	45167792
CRE17824	chr6	45345206	45346293
CRE17837	chr6	47445439	47446564
CRE17841	chr6	50783246	50783957
CRE17845	chr6	52148993	52150583
CRE17850	chr6	52441745	52442814
CRE17852	chr6	52535320	52536454
CRE17861	chr6	53211832	53213718
CRE17864	chr6	53480411	53481394
CRE17870	chr6	56536573	56537418
CRE17909	chr6	74170579	74172329
CRE17956	chr6	88182256	88183241
CRE17981	chr6	90538434	90540511
CRE17983	chr6	90994386	90995463
CRE17985	chr6	91079068	91079850
CRE17996	chr6	97284447	97285565
CRE18002	chr6	99276172	99277239
CRE18005	chr6	99872411	99874055
CRE18010	chr6	100036418	100037136
CRE18011	chr6	100795540	100797229
CRE18023	chr6	106348027	106348921
CRE18035	chr6	107077053	107077977
CRE18041	chr6	107996139	107996925
CRE18056	chr6	109703126	109704296
CRE18058	chr6	109775388	109776986
CRE18073	chr6	111180207	111181361
CRE18080	chr6	111804066	111805963
CRE18099	chr6	117804069	117805102
CRE18102	chr6	118508183	118509077
CRE18112	chr6	119399861	119400614
CRE18121	chr6	122720567	122721701
CRE18122	chr6	122792453	122793395
CRE1815	chr1	211555684	211556611
CRE18151	chr6	130030731	130031668
CRE18161	chr6	131948667	131949648
CRE18167	chr6	133119231	133120166
CRE18168	chr6	133134161	133135637
CRE1817	chr1	211590818	211591546
CRE18171	chr6	134339202	134340000
CRE18179	chr6	135334948	135335833
CRE18180	chr6	135350909	135351666
CRE18181	chr6	135375539	135376476
CRE18182	chr6	135424360	135425113
CRE18183	chr6	135449386	135450609
CRE18184	chr6	135466433	135467136
CRE18185	chr6	135501812	135502680
CRE18186	chr6	135503085	135504134
CRE18187	chr6	135504517	135505261
CRE18188	chr6	135544876	135545924
CRE18189	chr6	135601283	135602044
CRE18191	chr6	135643420	135644174
CRE18192	chr6	135818519	135819475
CRE18207	chr6	137736061	137737160
CRE18220	chr6	139094347	139095539
CRE18233	chr6	139763286	139764047
CRE18245	chr6	143177260	143177973
CRE18247	chr6	143247595	143248610
CRE1825	chr1	212359760	212360608
CRE1826	chr1	212458550	212460086
CRE18273	chr6	144975061	144975790
CRE18275	chr6	146055979	146057158
CRE18290	chr6	148851517	148852227
CRE18305	chr6	150038750	150039767
CRE18313	chr6	150739345	150740865
CRE18322	chr6	151772697	151773419
CRE18326	chr6	152622735	152623652
CRE18340	chr6	155635189	155636502
CRE18348	chr6	157341740	157342987
CRE18353	chr6	157694902	157696378
CRE18355	chr6	157801387	157802388
CRE18363	chr6	158652198	158653393
CRE18372	chr6	159289942	159291725
CRE18380	chr6	159525152	159526198
CRE18391	chr6	160940801	160941887
CRE18394	chr6	161694601	161695628
CRE1840	chr1	214025052	214025760
CRE18403	chr6	163881284	163882205
CRE18410	chr6	166796012	166797500
CRE18425	chr6	169989410	169990448
CRE18437	chr7	148716	150034
CRE1845	chr1	214775976	214777238
CRE18461	chr7	1498522	1499392
CRE18466	chr7	1570154	1571458
CRE18488	chr7	2738415	2739384
CRE18493	chr7	2933701	2934454
CRE185	chr1	12244362	12245066
CRE18500	chr7	4764779	4765676
CRE18509	chr7	5270850	5271777
CRE18513	chr7	5497082	5497793
CRE18518	chr7	5570285	5571153
CRE18528	chr7	6098255	6099259
CRE18532	chr7	6387722	6389229
CRE18539	chr7	6543309	6544512
CRE18560	chr7	7679604	7681004
CRE18564	chr7	8215498	8216965
CRE1857	chr1	220219140	220220593
CRE18581	chr7	16460306	16461220
CRE18587	chr7	17273678	17275136
CRE18605	chr7	21984314	21986020
CRE18607	chr7	22193174	22194031
CRE18622	chr7	23578752	23579909
CRE18631	chr7	24860356	24861221
CRE18633	chr7	25019524	25020339
CRE18635	chr7	25164157	25165869
CRE18654	chr7	27135711	27136548
CRE1869	chr1	222638646	222639618
CRE18698	chr7	32981626	32982768
CRE18714	chr7	36375468	36376437
CRE18732	chr7	38296795	38297526
CRE1874	chr1	222987978	222988813
CRE1876	chr1	223403508	223404234
CRE18813	chr7	50267606	50268327
CRE18828	chr7	52085365	52086481
CRE18860	chr7	63386120	63386972
CRE18872	chr7	64838712	64839533
CRE18874	chr7	65215455	65216755
CRE18884	chr7	65958067	65959039
CRE18888	chr7	66146350	66147255
CRE18896	chr7	66767082	66768290
CRE1891	chr1	224621877	224623252
CRE18936	chr7	73588147	73589547
CRE18953	chr7	74306243	74307288
CRE1897	chr1	225615869	225616667
CRE18973	chr7	75367805	75369511
CRE18983	chr7	75993779	75994543
CRE18999	chr7	77166691	77167879
CRE19019	chr7	86781246	86782663
CRE19025	chr7	87504778	87506605
CRE19026	chr7	87563057	87563893
CRE19039	chr7	91569752	91570671
CRE19047	chr7	92383915	92385487
CRE19056	chr7	94959640	94960652
CRE19059	chr7	95914680	95915615
CRE19084	chr7	99101965	99103072
CRE19096	chr7	99697912	99699769
CRE19111	chr7	100026773	100027577
CRE19118	chr7	100181388	100182161
CRE19131	chr7	100464471	100465381
CRE19134	chr7	100550454	100551364
CRE1915	chr1	226594185	226595750
CRE19155	chr7	101634265	101635434
CRE19158	chr7	101784398	101785104
CRE19178	chr7	102715012	102716521
CRE19179	chr7	102789102	102790372
CRE19202	chr7	105711489	105712863
CRE19205	chr7	105953960	105954825
CRE19210	chr7	106505561	106506444
CRE19253	chr7	117823550	117824621
CRE19267	chr7	123388392	123389320
CRE19286	chr7	128095258	128096618
CRE1930	chr1	227556748	227557502
CRE19301	chr7	129649912	129650743
CRE19307	chr7	130080230	130081447
CRE19309	chr7	130352828	130354046
CRE19335	chr7	134395219	134396215
CRE19362	chr7	139025457	139026630
CRE19367	chr7	139762075	139763187
CRE19397	chr7	142494477	142495589
CRE19420	chr7	144532204	144533762
CRE19433	chr7	148787548	148789011
CRE19434	chr7	148823077	148824291
CRE19438	chr7	148958608	148960015
CRE19440	chr7	149157199	149158530
CRE19443	chr7	149320978	149322721
CRE19462	chr7	150434378	150435233
CRE19473	chr7	150779996	150780817
CRE19478	chr7	151038598	151039784
CRE19485	chr7	151329518	151330457
CRE19486	chr7	151633057	151633860
CRE19503	chr7	155283711	155284666
CRE19514	chr7	157094413	157095594
CRE19515	chr7	157129117	157130097
CRE19520	chr7	157361116	157362246
CRE19530	chr7	158648862	158649866
CRE19538	chr8	356395	357489
CRE19551	chr8	1897623	1898419
CRE19557	chr8	2074890	2075678
CRE19573	chr8	6263591	6265280
CRE19588	chr8	8654504	8655655
CRE19668	chr8	22562148	22562994
CRE19680	chr8	23386185	23387065
CRE19688	chr8	26148428	26150162
CRE19689	chr8	26240145	26241858
CRE19693	chr8	27079340	27080482
CRE19710	chr8	28243217	28244790
CRE19722	chr8	29316629	29317697
CRE19735	chr8	30013259	30014588
CRE19753	chr8	37552261	37553387
CRE19773	chr8	38758832	38759740
CRE19787	chr8	41693247	41694017
CRE19841	chr8	55013529	55014473
CRE19871	chr8	60029735	60030472
CRE19872	chr8	60031112	60032935
CRE19879	chr8	61564266	61565205
CRE19903	chr8	67025406	67026410
CRE19906	chr8	67446580	67447614
CRE19918	chr8	68304766	68305538
CRE19946	chr8	75262411	75263352
CRE19950	chr8	77911965	77912927
CRE19964	chr8	81397350	81399119
CRE19966	chr8	81556933	81557683
CRE19987	chr8	87520122	87520965
CRE20018	chr8	95835035	95836127
CRE20025	chr8	96240496	96241469
CRE20029	chr8	97273382	97274447
CRE2003	chr1	234508647	234509791
CRE20039	chr8	98787524	98788561
CRE20055	chr8	101225150	101225963
CRE20056	chr8	101321536	101323072
CRE20067	chr8	102120481	102121738
CRE20075	chr8	103251504	103252261
CRE20078	chr8	103423644	103425158
CRE20081	chr8	103665617	103666337
CRE20097	chr8	104348772	104349560
CRE20110	chr8	107182515	107183271
CRE20115	chr8	109260275	109261389
CRE20131	chr8	116660008	116661198
CRE20132	chr8	116679800	116681143
CRE20146	chr8	119480937	119481666
CRE20150	chr8	120651087	120652048
CRE20157	chr8	121743385	121744312
CRE20159	chr8	121823280	121824018
CRE2016	chr1	235098258	235099207
CRE20170	chr8	124285986	124287023
CRE20172	chr8	124428099	124429820
CRE20195	chr8	126441550	126442281
CRE20197	chr8	126517993	126518698
CRE20212	chr8	130089444	130090375
CRE20229	chr8	131027504	131029581
CRE20254	chr8	135843799	135845185
CRE20270	chr8	142137814	142139241
CRE20294	chr8	144373105	144374172
CRE20296	chr8	144427137	144428008
CRE2030	chr1	236030212	236031340
CRE20301	chr8	144623359	144624281
CRE20307	chr8	144659721	144660729
CRE20315	chr8	144853500	144854269
CRE2032	chr1	236055780	236056593
CRE20341	chr8	145581859	145582907
CRE20351	chr8	145747233	145748417
CRE20357	chr8	146023835	146024793
CRE20361	chr8	146126338	146128075
CRE20364	chr8	146277047	146278542
CRE20369	chr9	214386	215344
CRE20374	chr9	503542	504619
CRE20387	chr9	3397657	3398849
CRE20400	chr9	5449790	5450897
CRE20403	chr9	5608516	5609697
CRE20408	chr9	6007689	6008946
CRE20410	chr9	6037661	6038373
CRE2044	chr1	236958591	236959468
CRE20450	chr9	19408742	19409820
CRE20453	chr9	20622509	20623303
CRE20457	chr9	21030808	21032096
CRE20461	chr9	21802458	21804086
CRE2047	chr1	241682375	241683514
CRE20486	chr9	32551244	32552657
CRE20510	chr9	34290653	34291841
CRE20513	chr9	34611607	34612582
CRE20515	chr9	34637461	34638451
CRE20524	chr9	35161776	35162845
CRE20545	chr9	36136507	36137247
CRE20562	chr9	37422046	37423213
CRE2060	chr1	243636587	243637381
CRE20620	chr9	68455035	68455936
CRE20651	chr9	72374126	72375399
CRE20655	chr9	73034037	73035034
CRE20660	chr9	74524693	74526123
CRE20688	chr9	79018172	79019041
CRE20707	chr9	80911164	80912545
CRE20715	chr9	83727655	83728673
CRE2077	chr1	245134086	245135095
CRE20771	chr9	93049997	93050808
CRE20775	chr9	93738613	93739330
CRE20776	chr9	93955576	93956678
CRE208	chr1	16160379	16162282
CRE20802	chr9	96792482	96793542
CRE20804	chr9	96928325	96929213
CRE20816	chr9	98256075	98257608
CRE20828	chr9	99616281	99617212
CRE2087	chr1	246670152	246671071
CRE20879	chr9	104159977	104161656
CRE20884	chr9	106855707	106856882
CRE2089	chr1	246729812	246730657
CRE20890	chr9	107877035	107877852
CRE20938	chr9	115141412	115142391
CRE20942	chr9	115625021	115625725
CRE20970	chr9	117691543	117692303
CRE20982	chr9	123555128	123556640
CRE210	chr1	16174350	16175665
CRE21016	chr9	126030220	126031717
CRE21034	chr9	127882943	127884195
CRE2105	chr1	247578887	247579602
CRE21054	chr9	129484670	129485834
CRE21069	chr9	130461299	130462156
CRE21114	chr9	131533500	131534764
CRE21133	chr9	132145573	132146567
CRE21166	chr9	134000419	134001404
CRE21182	chr9	135226160	135227126
CRE21183	chr9	135229571	135230583
CRE21192	chr9	135819631	135820679
CRE21194	chr9	135905105	135906846
CRE21203	chr9	136242152	136243163
CRE21208	chr9	136542222	136542931
CRE2121	chr10	530356	531191
CRE21223	chr9	137347766	137348944
CRE21227	chr9	138799419	138800372
CRE21262	chr9	139743037	139744152
CRE21268	chr9	139886373	139887411
CRE21271	chr9	139971413	139972661
CRE21277	chr9	140095288	140096082
CRE21345	chrX	7065474	7066749
CRE21349	chrX	9309206	9310104
CRE21363	chrX	11129015	11130005
CRE21372	chrX	12993040	12993978
CRE21374	chrX	13017378	13018396
CRE21381	chrX	13687103	13687939
CRE21394	chrX	15756146	15757305
CRE21448	chrX	24071959	24073474
CRE21450	chrX	24166544	24168306
CRE21452	chrX	24260990	24261833
CRE21469	chrX	30906832	30908612
CRE21470	chrX	31284270	31285227
CRE21478	chrX	37706180	37707334
CRE21482	chrX	38664126	38664962
CRE21512	chrX	40594505	40595616
CRE21515	chrX	40794634	40795374
CRE21522	chrX	41242045	41243150
CRE21541	chrX	44731242	44733994
CRE21561	chrX	47341649	47343153
CRE21576	chrX	48326860	48327965
CRE21582	chrX	48455640	48456792
CRE21620	chrX	51486030	51486984
CRE21622	chrX	51636112	51637065
CRE21623	chrX	51637684	51638404
CRE21628	chrX	52949726	52950859
CRE21629	chrX	52963556	52964891
CRE2165	chr10	5707707	5708646
CRE2166	chr10	5726739	5727650
CRE21690	chrX	62570706	62571835
CRE21692	chrX	62974227	62975471
CRE21693	chrX	63425239	63426681
CRE21702	chrX	64815449	64816184
CRE21706	chrX	64917807	64918601
CRE21741	chrX	70473557	70475039
CRE21753	chrX	71320845	71321556
CRE21756	chrX	71400735	71401942
CRE21760	chrX	71792118	71793191
CRE21768	chrX	73163604	73164697
CRE2178	chr10	6186331	6187971
CRE21783	chrX	77154392	77155378
CRE21787	chrX	77772768	77773500
CRE21792	chrX	78338034	78338810
CRE21806	chrX	80376408	80377276
CRE21807	chrX	80456921	80458288
CRE21812	chrX	85256732	85257900
CRE21823	chrX	100074633	100075887
CRE21830	chrX	100662418	100663978
CRE21831	chrX	100672913	100673788
CRE21835	chrX	101186207	101187478
CRE21843	chrX	102469614	102470539
CRE21844	chrX	102509244	102510134
CRE21853	chrX	102941837	102942975
CRE21862	chrX	106361473	106362577
CRE2189	chr10	6515477	6516639
CRE21900	chrX	117479069	117480723
CRE21908	chrX	118602168	118603212
CRE2191	chr10	6622165	6623239
CRE21912	chrX	118707996	118709502
CRE2193	chr10	6969526	6970554
CRE21936	chrX	119763032	119764816
CRE21951	chrX	123479730	123480939
CRE21991	chrX	130875047	130875800
CRE21993	chrX	130886461	130887379
CRE22011	chrX	132896778	132897950
CRE22034	chrX	135332659	135333852
CRE2204	chr10	7829589	7830738
CRE2206	chr10	8102394	8103241
CRE22066	chrX	148585849	148587040
CRE2208	chr10	8287120	8287832
CRE22115	chrX	153401297	153402695
CRE2212	chr10	10667197	10668042
CRE22127	chrX	153625816	153627452
CRE22140	chrX	153774971	153776050
CRE22143	chrX	153962281	153963393
CRE2222	chr10	11799512	11800222
CRE2229	chr10	12164280	12165172
CRE2235	chr10	12490188	12491664
CRE2237	chr10	12647429	12648521
CRE2241	chr10	13343597	13344656
CRE2242	chr10	13389172	13390061
CRE2252	chr10	14689921	14690988
CRE2256	chr10	14920011	14921406
CRE2265	chr10	15250277	15251392
CRE227	chr1	17221664	17223228
CRE2289	chr10	21784642	21785700
CRE2300	chr10	22628923	22629865
CRE2305	chr10	23002815	23004148
CRE2321	chr10	26726805	26728491
CRE2336	chr10	27541273	27542255
CRE2344	chr10	28591229	28592528
CRE2356	chr10	30637470	30638491
CRE236	chr1	17765361	17766220
CRE2367	chr10	31320087	31321352
CRE2374	chr10	32048450	32049956
CRE2376	chr10	32217219	32218472
CRE2378	chr10	32266378	32267179
CRE2382	chr10	32667166	32668333
CRE2392	chr10	35415271	35416872
CRE2427	chr10	43133500	43134660
CRE2429	chr10	43615860	43616563
CRE244	chr1	19577398	19578549
CRE2464	chr10	47655681	47656726
CRE2500	chr10	58120498	58121731
CRE2507	chr10	60144666	60145651
CRE2516	chr10	63539237	63540011
CRE2542	chr10	69523348	69524612
CRE2544	chr10	69643815	69645289
CRE2559	chr10	70803866	70804576
CRE2572	chr10	71905662	71906887
CRE2574	chr10	71992066	71993168
CRE2587	chr10	73292129	73292832
CRE2599	chr10	73648369	73649316
CRE2600	chr10	73945928	73946770
CRE2603	chr10	74007698	74009150
CRE2612	chr10	74090966	74091882
CRE2633	chr10	75531961	75533897
CRE2637	chr10	75625477	75626252
CRE2651	chr10	76870480	76872228
CRE2657	chr10	77168858	77170046
CRE2666	chr10	79788886	79789715
CRE2676	chr10	80896723	80897795
CRE2688	chr10	82167689	82168822
CRE2690	chr10	82213957	82215056
CRE2700	chr10	86184242	86184970
CRE2708	chr10	88159847	88160661
CRE2720	chr10	88854239	88855687
CRE2724	chr10	89263898	89265302
CRE2725	chr10	89577446	89578528
CRE2776	chr10	94050510	94051476
CRE2791	chr10	95461802	95462917
CRE2793	chr10	96121839	96122993
CRE2808	chr10	97825369	97826137
CRE2816	chr10	98459973	98460780
CRE2861	chr10	102133251	102134216
CRE2864	chr10	102295214	102296078
CRE2881	chr10	103745615	103746438
CRE2893	chr10	104191569	104192595
CRE2925	chr10	105667671	105668841
CRE2926	chr10	105670221	105671487
CRE2931	chr10	106014254	106015203
CRE2952	chr10	112624400	112625113
CRE2959	chr10	114438069	114439522
CRE296	chr1	24126114	24128109
CRE2979	chr10	116851657	116853326
CRE2981	chr10	118547127	118548274
CRE3000	chr10	120970985	120971789
CRE3001	chr10	121028359	121029294
CRE302	chr1	24717819	24718917
CRE3072	chr10	134260360	134261991
CRE3075	chr10	134401705	134403146
CRE3109	chr11	535087	536242
CRE3111	chr11	568497	569606
CRE312	chr1	25255459	25256462
CRE3138	chr11	1609905	1611064
CRE3143	chr11	1873855	1874863
CRE3149	chr11	2398581	2399739
CRE3161	chr11	3077867	3078902
CRE3187	chr11	5831125	5832229
CRE3207	chr11	7541019	7541916
CRE3210	chr11	8615267	8616444
CRE3225	chr11	9481492	9483480
CRE3245	chr11	10878643	10879825
CRE3257	chr11	13298394	13300246
CRE3279	chr11	17297736	17299434
CRE328	chr1	26185431	26186811
CRE3329	chr11	32913855	32915334
CRE3338	chr11	33933782	33934569
CRE3339	chr11	33942368	33943090
CRE334	chr1	26316689	26317883
CRE3340	chr11	34022691	34023578
CRE3347	chr11	34937145	34938456
CRE3360	chr11	39392559	39393437
CRE3362	chr11	43333526	43334330
CRE3365	chr11	43702086	43703917
CRE3368	chr11	43901935	43902918
CRE3377	chr11	44971280	44972400
CRE3387	chr11	45938961	45940394
CRE3389	chr11	46143309	46144441
CRE3411	chr11	47421412	47422283
CRE3412	chr11	47429150	47430418
CRE3419	chr11	47663366	47664865
CRE3450	chr11	57251904	57252933
CRE3453	chr11	57334753	57335805
CRE3461	chr11	58345090	58346561
CRE3496	chr11	61099964	61101505
CRE350	chr1	26827000	26828194
CRE3506	chr11	61582305	61584359
CRE3511	chr11	61734743	61735980
CRE3525	chr11	62413214	62414325
CRE3532	chr11	62494640	62495908
CRE354	chr1	26946851	26948629
CRE3540	chr11	62598595	62599789
CRE3555	chr11	63606353	63607461
CRE3566	chr11	63997739	63998686
CRE3575	chr11	64084943	64085746
CRE3594	chr11	64691654	64692571
CRE3601	chr11	64884664	64885379
CRE3611	chr11	65101003	65102721
CRE3616	chr11	65153487	65154616
CRE3624	chr11	65292339	65293467
CRE3643	chr11	65626990	65628727
CRE3651	chr11	65728616	65729612
CRE3666	chr11	66138863	66140023
CRE3678	chr11	66444602	66446058
CRE3682	chr11	66511693	66512760
CRE3683	chr11	66568165	66569126
CRE3699	chr11	67140533	67141313
CRE3710	chr11	67249960	67251064
CRE3718	chr11	67396687	67398716
CRE372	chr1	27626101	27627077
CRE3736	chr11	68816133	68817176
CRE3738	chr11	69064131	69064853
CRE376	chr1	27816274	27817403
CRE3771	chr11	72852911	72854830
CRE3780	chr11	73308735	73310118
CRE3789	chr11	74108878	74110388
CRE3815	chr11	75945512	75946702
CRE384	chr1	28051569	28053451
CRE3849	chr11	82671048	82671973
CRE386	chr1	28156847	28157842
CRE3865	chr11	85778976	85781137
CRE3911	chr11	95975931	95977094
CRE3930	chr11	104669113	104670244
CRE3956	chr11	109855167	109856327
CRE3959	chr11	110166286	110167376
CRE3969	chr11	111741641	111742724
CRE3978	chr11	112526943	112527806
CRE4001	chr11	117014522	117015973
CRE4009	chr11	117856701	117857956
CRE4020	chr11	118306271	118307678
CRE4030	chr11	118754406	118755241
CRE405	chr1	28974238	28975364
CRE4051	chr11	119205003	119205979
CRE4071	chr11	122614110	122615622
CRE4073	chr11	122753425	122754497
CRE4084	chr11	124543088	124544421
CRE4093	chr11	125495276	125496139
CRE4102	chr11	126173413	126174329
CRE4159	chr12	497843	498989
CRE4173	chr12	1058039	1059641
CRE4174	chr12	1099608	1100898
CRE4178	chr12	1710472	1711374
CRE4181	chr12	1905658	1906492
CRE4229	chr12	6579359	6580245
CRE4231	chr12	6642447	6644371
CRE4238	chr12	6771740	6772967
CRE4239	chr12	6798071	6799234
CRE4244	chr12	6930058	6931215
CRE4253	chr12	7052689	7054060
CRE4260	chr12	7282404	7283570
CRE4274	chr12	8234271	8235230
CRE4298	chr12	9917540	9918539
CRE4303	chr12	10365007	10365903
CRE4312	chr12	11883849	11884749
CRE4318	chr12	12044315	12045039
CRE4325	chr12	12510063	12510956
CRE4346	chr12	14409708	14410606
CRE4348	chr12	14436486	14437300
CRE436	chr1	32313907	32315025
CRE4381	chr12	21654270	21655219
CRE4391	chr12	24967199	24968349
CRE4396	chr12	25347628	25348864
CRE4397	chr12	25402908	25403879
CRE4398	chr12	25429052	25430002
CRE4399	chr12	25538591	25539583
CRE4401	chr12	26266554	26267618
CRE4406	chr12	27019966	27020696
CRE4411	chr12	27174908	27176074
CRE4416	chr12	27702331	27703065
CRE4418	chr12	27932489	27933693
CRE442	chr1	32478548	32480072
CRE4424	chr12	29301538	29302469
CRE4429	chr12	30848182	30849444
CRE4434	chr12	31478182	31478900
CRE4449	chr12	32111746	32112918
CRE4473	chr12	38710323	38711303
CRE4493	chr12	45241533	45242643
CRE4503	chr12	46383632	46384573
CRE4514	chr12	47600431	47601232
CRE4519	chr12	48099412	48100456
CRE4534	chr12	49109768	49110742
CRE4535	chr12	49208372	49209476
CRE4545	chr12	49524033	49525366
CRE4555	chr12	50016323	50017348
CRE4572	chr12	50794200	50795237
CRE4573	chr12	50898525	50899618
CRE4577	chr12	51157404	51158857
CRE4612	chr12	53614787	53615630
CRE4631	chr12	54148467	54149656
CRE4638	chr12	54610212	54611326
CRE4646	chr12	54866747	54867934
CRE4664	chr12	56366615	56368523
CRE4681	chr12	56727096	56728300
CRE4699	chr12	57481125	57482647
CRE4704	chr12	57633379	57634503
CRE4722	chr12	58145141	58146305
CRE473	chr1	33646587	33647730
CRE4756	chr12	65063095	65063830
CRE4761	chr12	65562841	65563864
CRE4775	chr12	67639355	67640111
CRE4787	chr12	69080180	69081178
CRE4797	chr12	70132090	70133597
CRE480	chr1	35331142	35332339
CRE4808	chr12	72723907	72724614
CRE4822	chr12	76952930	76954137
CRE483	chr1	35544575	35545471
CRE4840	chr12	85388653	85389382
CRE4844	chr12	88429042	88430015
CRE4871	chr12	92539970	92541216
CRE4889	chr12	94070769	94071833
CRE4891	chr12	94601698	94602549
CRE4896	chr12	94853167	94854475
CRE4928	chr12	98896823	98898084
CRE4948	chr12	102189475	102190205
CRE4963	chr12	104350459	104351632
CRE4969	chr12	104609311	104610168
CRE4994	chr12	107349624	107350944
CRE5017	chr12	109611264	109612314
CRE5039	chr12	111020016	111021139
CRE5053	chr12	111842648	111843408
CRE5069	chr12	112846618	112847461
CRE5077	chr12	113590618	113591409
CRE5079	chr12	113622660	113623817
CRE509	chr1	36839788	36840862
CRE5125	chr12	120314648	120315779
CRE5134	chr12	120729447	120730585
CRE5137	chr12	120754447	120755604
CRE5164	chr12	121733258	121735201
CRE5165	chr12	121789685	121790702
CRE5167	chr12	121836898	121838708
CRE5168	chr12	121903751	121904520
CRE5197	chr12	122750613	122751527
CRE5201	chr12	123010677	123012356
CRE521	chr1	38019073	38020159
CRE5231	chr12	124457580	124458453
CRE5279	chr12	132194926	132196100
CRE5285	chr12	132413242	132414222
CRE5327	chr13	21140513	21141859
CRE5355	chr13	24841092	24841831
CRE5361	chr13	25860707	25861883
CRE5362	chr13	25866054	25866771
CRE5380	chr13	27844617	27845771
CRE5385	chr13	28029293	28030315
CRE5390	chr13	28711591	28713307
CRE5400	chr13	29814013	29814737
CRE5407	chr13	30880744	30881861
CRE5412	chr13	30982314	30983153
CRE5415	chr13	31077682	31078440
CRE5423	chr13	31736407	31737441
CRE5424	chr13	31774067	31775224
CRE5433	chr13	33160401	33161871
CRE5446	chr13	34361032	34361932
CRE5454	chr13	37632925	37634059
CRE5473	chr13	41495257	41496319
CRE5479	chr13	41706407	41707461
CRE5493	chr13	42748143	42749060
CRE551	chr1	39680806	39681543
CRE5513	chr13	45151005	45152537
CRE552	chr1	39696060	39696802
CRE5535	chr13	47126707	47128558
CRE5551	chr13	49116518	49117346
CRE5555	chr13	49684169	49685089
CRE5566	chr13	50202027	50203161
CRE5571	chr13	50570394	50572142
CRE5587	chr13	52157786	52159557
CRE5634	chr13	74707114	74708226
CRE5651	chr13	78303610	78304353
CRE5654	chr13	79232846	79233659
CRE5670	chr13	89571829	89572530
CRE5681	chr13	95325958	95326707
CRE5735	chr13	107220002	107220916
CRE5750	chr13	111162661	111163386
CRE577	chr1	41157137	41157986
CRE5798	chr14	20895431	20896746
CRE5814	chr14	21571890	21572694
CRE5815	chr14	21736861	21737831
CRE5830	chr14	22538887	22539905
CRE5835	chr14	23025366	23026494
CRE5852	chr14	23540005	23541113
CRE5869	chr14	24457963	24458786
CRE5880	chr14	24630438	24631277
CRE589	chr1	42204741	42205448
CRE59	chr1	2177572	2178449
CRE5922	chr14	34121840	34122585
CRE5936	chr14	35451623	35452801
CRE5937	chr14	35514662	35516333
CRE5985	chr14	50437986	50438704
CRE5997	chr14	51134211	51135484
CRE6000	chr14	51289612	51290526
CRE6002	chr14	51326621	51327511
CRE6009	chr14	52117746	52119175
CRE6013	chr14	52487681	52488440
CRE6020	chr14	53018328	53019507
CRE6030	chr14	53628565	53629392
CRE6033	chr14	53999589	54000456
CRE6041	chr14	54999348	55000064
CRE6051	chr14	55737571	55738949
CRE6053	chr14	56046398	56047690
CRE6055	chr14	56584308	56585076
CRE6061	chr14	56879616	56880642
CRE607	chr1	43500063	43501195
CRE6085	chr14	60797820	60798947
CRE6087	chr14	60864152	60864977
CRE6089	chr14	61123940	61124739
CRE6101	chr14	61969214	61970651
CRE6108	chr14	62356228	62357379
CRE6111	chr14	64116762	64117781
CRE6114	chr14	64226124	64226998
CRE6115	chr14	64319758	64321028
CRE6119	chr14	64804770	64806065
CRE6122	chr14	64970476	64972008
CRE6129	chr14	65453303	65454488
CRE6158	chr14	69149295	69150672
CRE6180	chr14	71066957	71067879
CRE6184	chr14	71180058	71180880
CRE6193	chr14	72985384	72986280
CRE6194	chr14	73393076	73394163
CRE6196	chr14	73524557	73526041
CRE6202	chr14	74035870	74037069
CRE6207	chr14	74162771	74163476
CRE6208	chr14	74180135	74181270
CRE6242	chr14	75800621	75801735
CRE6248	chr14	76126782	76128238
CRE6257	chr14	77494354	77495934
CRE6258	chr14	77499361	77500477
CRE6260	chr14	77509195	77510241
CRE6271	chr14	78082349	78083224
CRE6280	chr14	81407617	81408767
CRE6287	chr14	81685647	81686667
CRE6288	chr14	81687251	81687975
CRE6313	chr14	89881951	89882752
CRE6319	chr14	90167637	90168594
CRE633	chr1	45162204	45163225
CRE6331	chr14	91254408	91255183
CRE6346	chr14	91882434	91883505
CRE6354	chr14	92587798	92588879
CRE6399	chr14	99397886	99399061
CRE6404	chr14	100070871	100072230
CRE6423	chr14	102028671	102029778
CRE6426	chr14	102197269	102198141
CRE6432	chr14	102342065	102342885
CRE6444	chr14	103021429	103022399
CRE6460	chr14	104214229	104215148
CRE6467	chr14	105155721	105156877
CRE6503	chr14	106539018	106539725
CRE6514	chr14	106691498	106692412
CRE6553	chr15	25683534	25684926
CRE6555	chr15	26327297	26328431
CRE6564	chr15	29561512	29562618
CRE6572	chr15	31295952	31296685
CRE6578	chr15	31617398	31618694
CRE6587	chr15	33360377	33361081
CRE6590	chr15	33493747	33494735
CRE6601	chr15	34728768	34730391
CRE6612	chr15	36699599	36700377
CRE6616	chr15	37391879	37392727
CRE6634	chr15	40360948	40362176
CRE6644	chr15	40697480	40698644
CRE6663	chr15	41576141	41577155
CRE6666	chr15	41694166	41695173
CRE6670	chr15	41912888	41914436
CRE668	chr1	46768318	46769631
CRE6748	chr15	49595106	49595904
CRE675	chr1	47184170	47185735
CRE6758	chr15	50715931	50717101
CRE676	chr1	47696820	47697746
CRE6762	chr15	51168816	51169540
CRE677	chr1	47704460	47705886
CRE6771	chr15	52121797	52122854
CRE6774	chr15	52305256	52306300
CRE679	chr1	47799097	47800466
CRE6807	chr15	57024761	57025767
CRE6810	chr15	57210636	57212490
CRE6828	chr15	59279872	59280765
CRE6854	chr15	63569042	63570227
CRE6887	chr15	65596324	65597558
CRE6890	chr15	65822307	65823414
CRE6893	chr15	66096933	66097641
CRE6926	chr15	68346179	68347925
CRE6934	chr15	69073655	69074414
CRE6955	chr15	70820443	70821348
CRE6971	chr15	73075420	73076900
CRE6974	chr15	74168137	74168906
CRE6977	chr15	74243733	74244461
CRE6983	chr15	74752847	74754057
CRE6988	chr15	74907106	74908940
CRE6998	chr15	75229408	75230958
CRE7008	chr15	75627959	75628835
CRE7015	chr15	76030545	76031775
CRE7024	chr15	76603107	76604270
CRE7026	chr15	77196826	77197790
CRE7033	chr15	77712697	77713571
CRE7038	chr15	78342408	78343139
CRE7043	chr15	78441182	78442127
CRE705	chr1	53018131	53019960
CRE7051	chr15	78730343	78731391
CRE7092	chr15	83517842	83518593
CRE71	chr1	2573939	2574915
CRE7101	chr15	85113237	85114055
CRE7143	chr15	90544208	90545073
CRE7176	chr15	91361500	91362580
CRE7178	chr15	91382717	91383464
CRE7182	chr15	91445485	91446972
CRE7190	chr15	92021549	92022614
CRE7247	chr15	100105630	100106583
CRE7255	chr15	101141903	101143520
CRE726	chr1	54355079	54355938
CRE7263	chr15	101728206	101728934
CRE7280	chr16	103117	104418
CRE7282	chr16	187822	189398
CRE7288	chr16	420193	421206
CRE7297	chr16	619072	620120
CRE7300	chr16	685892	687101
CRE7301	chr16	691399	693056
CRE7302	chr16	698362	699516
CRE7304	chr16	729283	730989
CRE7314	chr16	1020097	1021202
CRE7327	chr16	1664093	1665047
CRE7339	chr16	2033652	2034898
CRE7358	chr16	2582021	2583184
CRE7360	chr16	2652994	2654022
CRE7361	chr16	2723049	2724089
CRE7369	chr16	2961405	2962757
CRE7379	chr16	3155915	3156795
CRE7382	chr16	3199707	3200689
CRE7383	chr16	3208813	3209656
CRE7406	chr16	4400460	4401539
CRE7412	chr16	4555414	4556189
CRE7423	chr16	4896693	4897550
CRE7461	chr16	11318335	11319511
CRE747	chr1	56982168	56982922
CRE7480	chr16	11862367	11863243
CRE7481	chr16	11876899	11877771
CRE7482	chr16	11890265	11892122
CRE7513	chr16	15148978	15150149
CRE7518	chr16	15736604	15737798
CRE753	chr1	59369274	59370257
CRE7543	chr16	17623605	17624648
CRE7545	chr16	18056807	18057601
CRE7587	chr16	22202358	22203171
CRE759	chr1	60279932	60281055
CRE7612	chr16	25077857	25078858
CRE7621	chr16	27248142	27248949
CRE764	chr1	62106895	62107687
CRE7657	chr16	28995739	28997066
CRE7674	chr16	29674014	29675057
CRE7687	chr16	30006636	30007449
CRE7693	chr16	30106577	30108302
CRE7707	chr16	30418278	30419298
CRE7718	chr16	30596581	30597606
CRE7726	chr16	30773350	30774285
CRE7747	chr16	31152954	31154467
CRE7755	chr16	31519242	31520306
CRE776	chr1	64059246	64060332
CRE7793	chr16	47494410	47495311
CRE7802	chr16	48646606	48647386
CRE7805	chr16	49475291	49476133
CRE7806	chr16	49496225	49497824
CRE7856	chr16	57125881	57127080
CRE7861	chr16	57293668	57294812
CRE7882	chr16	58425903	58427143
CRE7905	chr16	67193183	67194371
CRE7915	chr16	67551561	67552728
CRE7957	chr16	69372941	69374118
CRE7959	chr16	69418876	69419860
CRE7961	chr16	69458299	69459446
CRE7965	chr16	69760248	69761448
CRE7983	chr16	70557106	70558256
CRE8037	chr16	76668699	76669611
CRE8044	chr16	79122790	79123879
CRE805	chr1	69759424	69760178
CRE8065	chr16	81478852	81479869
CRE8082	chr16	83170574	83171768
CRE8086	chr16	83972527	83973363
CRE8108	chr16	85148489	85149277
CRE8116	chr16	85569732	85570470
CRE8127	chr16	86637913	86639076
CRE8138	chr16	87588386	87589158
CRE8157	chr16	88700605	88701687
CRE8177	chr16	89283202	89284299
CRE8181	chr16	89571468	89572698
CRE8184	chr16	89626525	89627486
CRE820	chr1	76251303	76252257
CRE8211	chr17	899800	900998
CRE8243	chr17	1933208	1934255
CRE8258	chr17	2717522	2718514
CRE8276	chr17	4166797	4167797
CRE829	chr1	78244796	78245875
CRE8291	chr17	4699228	4700114
CRE8295	chr17	4851280	4852857
CRE8310	chr17	5388992	5390664
CRE8312	chr17	5522057	5522935
CRE8313	chr17	6346718	6347592
CRE8315	chr17	6554439	6555332
CRE8317	chr17	6656019	6656759
CRE833	chr1	78469713	78470960
CRE8349	chr17	7517431	7519013
CRE8351	chr17	7589466	7590545
CRE8357	chr17	7818647	7819766
CRE836	chr1	82691202	82691919
CRE8363	chr17	7982619	7983614
CRE8368	chr17	8065450	8067091
CRE8369	chr17	8076615	8077410
CRE8384	chr17	8338723	8339755
CRE8407	chr17	13834655	13835440
CRE841	chr1	84542884	84544280
CRE8421	chr17	15902386	15903694
CRE8425	chr17	16188931	16190555
CRE8428	chr17	16311204	16312016
CRE8444	chr17	17140205	17141034
CRE8448	chr17	17380079	17381194
CRE8450	chr17	17494530	17496048
CRE8468	chr17	18161029	18162703
CRE8469	chr17	18163661	18164706
CRE850	chr1	85039161	85040173
CRE8502	chr17	19350051	19351090
CRE8511	chr17	20743722	20744428
CRE8541	chr17	26368235	26369437
CRE8559	chr17	27070811	27071974
CRE8561	chr17	27139090	27140525
CRE8562	chr17	27169159	27170206
CRE8566	chr17	27229122	27230043
CRE8588	chr17	28087659	28088502
CRE8592	chr17	28431550	28432559
CRE8597	chr17	28705375	28706444
CRE8622	chr17	30227966	30228969
CRE8632	chr17	30645504	30646235
CRE8645	chr17	33288042	33288904
CRE8646	chr17	33307013	33308342
CRE8654	chr17	33519727	33520462
CRE8682	chr17	35447019	35447926
CRE8703	chr17	36885862	36886591
CRE8706	chr17	36981250	36982186
CRE8710	chr17	37212902	37213768
CRE872	chr1	89149955	89150691
CRE8720	chr17	37606965	37608142
CRE8724	chr17	37792861	37793863
CRE8729	chr17	37909731	37911807
CRE8742	chr17	38375046	38375972
CRE875	chr1	89488049	89489018
CRE8750	chr17	38710017	38710752
CRE8757	chr17	39723174	39724265
CRE8783	chr17	40539776	40541375
CRE8806	chr17	41173572	41174299
CRE8812	chr17	41392588	41393569
CRE8819	chr17	41560567	41562111
CRE8822	chr17	41846125	41846863
CRE8833	chr17	42263497	42265127
CRE885	chr1	90223243	90223945
CRE8852	chr17	43238162	43239137
CRE8882	chr17	45248986	45249689
CRE8887	chr17	45400509	45402268
CRE8892	chr17	45772137	45772947
CRE8908	chr17	46687754	46688898
CRE8912	chr17	46969259	46970502
CRE8923	chr17	47592749	47593586
CRE8927	chr17	47784674	47785811
CRE8934	chr17	48171812	48173182
CRE8952	chr17	49230088	49231536
CRE8964	chr17	54856704	54857696
CRE8968	chr17	55055010	55056315
CRE8971	chr17	55334065	55335008
CRE899	chr1	92269671	92270441
CRE9008	chr17	57696767	57697852
CRE9016	chr17	58041611	58042681
CRE9019	chr17	58212158	58213290
CRE9030	chr17	59940412	59941413
CRE9049	chr17	61904206	61905340
CRE9051	chr17	61925963	61926816
CRE9053	chr17	62023478	62024343
CRE9058	chr17	62222846	62223896
CRE9059	chr17	62256940	62257657
CRE906	chr1	92950202	92952446
CRE9062	chr17	62501716	62503110
CRE907	chr1	92970067	92970871
CRE9078	chr17	63118983	63120013
CRE908	chr1	93049411	93050457
CRE909	chr1	93250085	93250972
CRE9090	chr17	64403038	64403748
CRE91	chr1	6086233	6087165
CRE9109	chr17	66031543	66032584
CRE9111	chr17	66097441	66098620
CRE9114	chr17	66201565	66202454
CRE9130	chr17	67322885	67323900
CRE9159	chr17	73083459	73084626
CRE9177	chr17	73400182	73401990
CRE9197	chr17	73872136	73873003
CRE9198	chr17	73892198	73893493
CRE9205	chr17	74033610	74034334
CRE9207	chr17	74067964	74069099
CRE923	chr1	94312038	94313684
CRE9230	chr17	74732713	74734225
CRE9239	chr17	75231149	75232080
CRE926	chr1	94557018	94558675
CRE9274	chr17	76661998	76662749
CRE9291	chr17	77811646	77812823
CRE9301	chr17	78120363	78121825
CRE931	chr1	95428074	95428900
CRE9310	chr17	78637966	78638799
CRE9312	chr17	78711317	78712395
CRE9323	chr17	79174254	79174956
CRE9324	chr17	79196062	79197686
CRE9332	chr17	79370060	79371127
CRE9337	chr17	79479881	79480980
CRE9347	chr17	79790967	79791885
CRE9352	chr17	79848445	79849978
CRE9359	chr17	79979983	79980968
CRE9360	chr17	79994767	79996111
CRE9362	chr17	80022771	80024344
CRE9393	chr17	80673980	80675314
CRE9394	chr17	80708814	80710434
CRE9414	chr18	657222	658076
CRE9424	chr18	2641319	2642297
CRE9428	chr18	2905960	2906764
CRE9429	chr18	2960248	2961036
CRE9436	chr18	3447538	3448368
CRE9439	chr18	3593516	3595181
CRE9467	chr18	9913544	9915162
CRE9483	chr18	12376268	12377423
CRE9489	chr18	12750264	12751100
CRE9490	chr18	12775240	12776376
CRE9497	chr18	12990718	12991880
CRE9520	chr18	19320462	19321490
CRE9535	chr18	21120333	21121081
CRE9547	chr18	23713383	23714281
CRE9565	chr18	29671477	29672367
CRE9592	chr18	39534579	39535623
CRE9601	chr18	43266738	43267584
CRE9602	chr18	43355107	43356018
CRE9605	chr18	43607680	43608811
CRE9607	chr18	43677507	43678601
CRE9614	chr18	44125923	44126833
CRE963	chr1	101822457	101823256
CRE9642	chr18	47833597	47834654
CRE9644	chr18	47900807	47902044
CRE9662	chr18	52987889	52988700
CRE9669	chr18	54305303	54306485
CRE9674	chr18	55326348	55327111
CRE9679	chr18	56338053	56339622
CRE9681	chr18	56529851	56530753
CRE9685	chr18	56806295	56807447
CRE9704	chr18	60606951	60607671
CRE971	chr1	107993885	107994629
CRE9754	chr18	74826563	74827435
CRE9757	chr18	76828227	76830369
CRE9781	chr19	556071	556859
CRE9782	chr19	571003	572971
CRE9784	chr19	610499	611465
CRE9785	chr19	632775	634044
CRE9789	chr19	703083	703873
CRE98	chr1	6639574	6640904
CRE9802	chr19	1026030	1027164
CRE9818	chr19	1241527	1242398
CRE9819	chr19	1244419	1245240
CRE9825	chr19	1344760	1345557
CRE9836	chr19	1604941	1605937
CRE9840	chr19	1766803	1767607
CRE9850	chr19	1897192	1898105
CRE9855	chr19	2042120	2042957
CRE9857	chr19	2060610	2062209
CRE9863	chr19	2163229	2164560
CRE9871	chr19	2328256	2329195
CRE9894	chr19	2976467	2978153
CRE9895	chr19	3035305	3036256
CRE9897	chr19	3061357	3062211
CRE9900	chr19	3134930	3136794
CRE9904	chr19	3180472	3181491
CRE9905	chr19	3185283	3186087
CRE991	chr1	109583438	109584685
CRE9913	chr19	3428150	3429042
CRE9914	chr19	3434613	3435744
CRE992	chr1	109618229	109619143
CRE9945	chr19	4342205	4344086
CRE9953	chr19	4638110	4640206
CRE9955	chr19	4723115	4724055
CRE9957	chr19	4830999	4832134
CRE9961	chr19	4968880	4969698
CRE9965	chr19	5585472	5586224
CRE9966	chr19	5622296	5623678
CRE9993	chr19	6530557	6531459

## Sheet: sgRNA
sgRNA ID	CRE ID	Coordinates	sgRNA Sequence
sgRNA_00001	CRE1000	chr1:110026630-110026649	CCGAGTCTCGATGACTTCGC
sgRNA_00002	CRE1000	chr1:110026633-110026652	CCCGCGAAGTCATCGAGACT
sgRNA_00003	CRE1000	chr1:110026629-110026648	GCCGAGTCTCGATGACTTCG
sgRNA_00004	CRE1000	chr1:110026787-110026806	CGGACGGCGGCTCCAGTCGG
sgRNA_00005	CRE1000	chr1:110026935-110026954	TGGGGGCAGGTATTAGCGAC
sgRNA_00006	CRE10003	chr19:6862564-6862583	GGGGTGGGTGAAAAGTTGTT
sgRNA_00007	CRE10003	chr19:6862923-6862942	GCAAGCGCGGCTTTAATTTG
sgRNA_00008	CRE10003	chr19:6862910-6862929	TAATTTGTGGCTGTCTGCGG
sgRNA_00009	CRE10003	chr19:6863698-6863717	ATACGCGGAACTTGGTTCCG
sgRNA_00010	CRE10003	chr19:6863706-6863725	TGGGCAAGATACGCGGAACT
sgRNA_00011	CRE10009	chr19:7197798-7197817	CTCTGGAACCGACCAATCCT
sgRNA_00012	CRE10009	chr19:7198230-7198249	CGCCCATTGGCTGAGCGCGA
sgRNA_00013	CRE10009	chr19:7198190-7198209	GAATCCGGCCCCGGCGGTTG
sgRNA_00014	CRE10009	chr19:7198243-7198262	CCTGCAGCACGCCCGCCCAT
sgRNA_00015	CRE10009	chr19:7198521-7198540	GAGGAGATCGGGTCACCGCG
sgRNA_00016	CRE10019	chr19:7587183-7587202	ACAGCGTTGAGATAGTAGGC
sgRNA_00017	CRE10019	chr19:7587410-7587429	CGCATGCGCGCTGTTCCGGC
sgRNA_00018	CRE10019	chr19:7587406-7587425	GGCACGCATGCGCGCTGTTC
sgRNA_00019	CRE10019	chr19:7587411-7587430	GCATGCGCGCTGTTCCGGCA
sgRNA_00020	CRE10019	chr19:7587697-7587716	AGCCCGCCCGCCTGAGTTCG
sgRNA_00021	CRE10032	chr19:7933972-7933991	CAGCTTCTCTCCGGACGACG
sgRNA_00022	CRE10032	chr19:7934090-7934109	CGGAGGGTGGTGGCGTCACA
sgRNA_00023	CRE10032	chr19:7934351-7934370	GGGCCCTTCAGTCTCGTAGA
sgRNA_00024	CRE10032	chr19:7934330-7934349	AGGGGCGGGGGTCGCCGACT
sgRNA_00025	CRE10032	chr19:7934358-7934377	TGCACCATCTACGAGACTGA
sgRNA_00026	CRE10045	chr19:8386065-8386084	GGGGTTCCCAGGGAGATTCG
sgRNA_00027	CRE10045	chr19:8386339-8386358	GGTGCTAGAACGTCCTATAA
sgRNA_00028	CRE10045	chr19:8386355-8386374	GCTTCGGGGAGAGCCTTTAT
sgRNA_00029	CRE10045	chr19:8386369-8386388	GAGAGGAGTCACGTGCTTCG
sgRNA_00030	CRE10045	chr19:8386504-8386523	GGGTTCAGACCCGGCCCGTT
sgRNA_00031	CRE10053	chr19:8578664-8578683	TGCTCGAGGCCGGCCGGTCT
sgRNA_00032	CRE10053	chr19:8578710-8578729	GGCCCGGATGTAAGAAGTTT
sgRNA_00033	CRE10053	chr19:8578919-8578938	CGCGCTCACCATCTTCGACA
sgRNA_00034	CRE10053	chr19:8578921-8578940	CGTGTCGAAGATGGTGAGCG
sgRNA_00035	CRE10053	chr19:8579040-8579059	CTCTCAGCTCTCGCGAGACT
sgRNA_00036	CRE10057	chr19:8942840-8942859	CCGAGTCCAGGGGGCGACGT
sgRNA_00037	CRE10057	chr19:8943022-8943041	ACGTCCCCTTCCGGCTCGCG
sgRNA_00038	CRE10057	chr19:8943227-8943246	GCTGTGAGCCGCACGAGGCC
sgRNA_00039	CRE10057	chr19:8943222-8943241	GCCAGGCTGTGAGCCGCACG
sgRNA_00040	CRE10057	chr19:8943192-8943211	AGCGGGGGTAAGGTTGGCCC
sgRNA_00041	CRE10071	chr19:9938244-9938263	CAGGAGCTTACCCCTACTCC
sgRNA_00042	CRE10071	chr19:9938522-9938541	TGACCACACCCCCTGGCTAG
sgRNA_00043	CRE10071	chr19:9938521-9938540	TTGACCACACCCCCTGGCTA
sgRNA_00044	CRE10071	chr19:9938517-9938536	CAGGGGGTGTGGTCAACACT
sgRNA_00045	CRE10071	chr19:9938701-9938720	TGTCGCGACCCAGCCACCCA
sgRNA_00046	CRE10087	chr19:10416119-10416138	CGGGGTCCTCTGGGTCCGAC
sgRNA_00047	CRE10087	chr19:10416403-10416422	CCTCCCTGAGGGCTCTAAAT
sgRNA_00048	CRE10087	chr19:10416404-10416423	CTCCCTGAGGGCTCTAAATG
sgRNA_00049	CRE10087	chr19:10416410-10416429	CTTCCCCATTTAGAGCCCTC
sgRNA_00050	CRE10087	chr19:10416635-10416654	GGCAGACAAGGTATTAGCAC
sgRNA_00051	CRE10091	chr19:10491108-10491127	GGGGACTGGCTGCGCTTGAC
sgRNA_00052	CRE10091	chr19:10491324-10491343	AAAATCCAATGGTGACGAGC
sgRNA_00053	CRE10091	chr19:10491323-10491342	AAATCCAATGGTGACGAGCA
sgRNA_00054	CRE10091	chr19:10491357-10491376	CAATGAGAGTGCCGCCACCA
sgRNA_00055	CRE10091	chr19:10491570-10491589	GCGTGTACGGTCCTGACCCT
sgRNA_00056	CRE10093	chr19:10613278-10613297	GGCCGTGGCGCCCGTTTTCC
sgRNA_00057	CRE10093	chr19:10613419-10613438	GCGCCTCCATCGCTGCGCGT
sgRNA_00058	CRE10093	chr19:10613493-10613512	GACTTTTATTGTGACACGGC
sgRNA_00059	CRE10093	chr19:10613486-10613505	ATTGTGACACGGCGGGCGCC
sgRNA_00060	CRE10093	chr19:10613779-10613798	ACCCCCTACGGAGGCGACCT
sgRNA_00061	CRE10096	chr19:10676399-10676418	CTCGTCGCTTGAGTCCGACT
sgRNA_00062	CRE10096	chr19:10676534-10676553	CCTGCGCGCGCCGGCCGGTT
sgRNA_00063	CRE10096	chr19:10676692-10676711	CCTCAATGCGCGTGCGCAAT
sgRNA_00064	CRE10096	chr19:10676689-10676708	CCCATTGCGCACGCGCATTG
sgRNA_00065	CRE10096	chr19:10676650-10676669	TGCGACGACCCGCGCGGTTC
sgRNA_00066	CRE10099	chr19:10764302-10764321	CAATGCGCGCCCGGGTTCTT
sgRNA_00067	CRE10099	chr19:10764460-10764479	TTTAGTGGCGGTATCTCGGC
sgRNA_00068	CRE10099	chr19:10764667-10764686	AGTCCTCCATCACGTGACGA
sgRNA_00069	CRE10099	chr19:10764657-10764676	CACGTGACGAGGGCACGCTC
sgRNA_00070	CRE10099	chr19:10764668-10764687	GAGTCCTCCATCACGTGACG
sgRNA_00071	CRE10106	chr19:10958951-10958970	CCGCAACCAGAGAGGTGCGC
sgRNA_00072	CRE10106	chr19:10959153-10959172	TTGGCTGGGAAATCCGGCTG
sgRNA_00073	CRE10106	chr19:10959168-10959187	CATCTCTCTCTGCGTTTGGC
sgRNA_00074	CRE10106	chr19:10959101-10959120	CCTCCTGTGAGGCCAGATCG
sgRNA_00075	CRE10106	chr19:10959266-10959285	CTGTCCACCTTGCCGCTCCA
sgRNA_00076	CRE10128	chr19:11545937-11545956	AAATGCACTTTCCGACCGCT
sgRNA_00077	CRE10128	chr19:11546198-11546217	AAAAATGCCCGCGAACCCCC
sgRNA_00078	CRE10128	chr19:11546199-11546218	GGGGTTCGCGGGCATTTTTC
sgRNA_00079	CRE10128	chr19:11546181-11546200	CCCAGGGGCGGGATAAGGTT
sgRNA_00080	CRE10128	chr19:11546513-11546532	CCTACACGAGGCCGGAGCAA
sgRNA_00081	CRE10147	chr19:12163482-12163501	ACAGTCCCCCTAGCGCAGCT
sgRNA_00082	CRE10147	chr19:12163599-12163618	AAATGGTGAGCATGCGGTGC
sgRNA_00083	CRE10147	chr19:12163598-12163617	AATGGTGAGCATGCGGTGCT
sgRNA_00084	CRE10147	chr19:12163834-12163853	TAGCGCCCCTGATTGGATAG
sgRNA_00085	CRE10147	chr19:12163842-12163861	CTAGACCCCTATCCAATCAG
sgRNA_00086	CRE10151	chr19:12267300-12267319	CGGCTCGAACCGGCTCTAGC
sgRNA_00087	CRE10151	chr19:12267492-12267511	AGGTCGGGATCTCGGTTTTC
sgRNA_00088	CRE10151	chr19:12267482-12267501	CTCGGTTTTCCGGCCCCGAG
sgRNA_00089	CRE10151	chr19:12267512-12267531	CCCTTTGGTGCAAGACGCCT
sgRNA_00090	CRE10151	chr19:12267778-12267797	CGGTACCCCCTCTAGCAATT
sgRNA_00091	CRE10154	chr19:12444078-12444097	TTGCCGCGCAGGGACCGGAT
sgRNA_00092	CRE10154	chr19:12444347-12444366	TGTCACAGTGGGACCCGCAC
sgRNA_00093	CRE10154	chr19:12444479-12444498	CGCCGCGGGCTCTTTGAACC
sgRNA_00094	CRE10154	chr19:12444515-12444534	CTGTCAATCAGGCGCACGGC
sgRNA_00095	CRE10154	chr19:12444519-12444538	AGAACTGTCAATCAGGCGCA
sgRNA_00096	CRE10159	chr19:12606062-12606081	GTCTCTGGCAGGACAGTTTC
sgRNA_00097	CRE10159	chr19:12606268-12606287	GAGCCACCTAGCGACGTTCG
sgRNA_00098	CRE10159	chr19:12606262-12606281	CTGCCTCGAACGTCGCTAGG
sgRNA_00099	CRE10159	chr19:12606264-12606283	CACCTAGCGACGTTCGAGGC
sgRNA_00100	CRE10159	chr19:12606421-12606440	GAACCGGCTGTCGCGGGAAC
sgRNA_00101	CRE10162	chr19:12721741-12721760	TGCTACGTCACTGTGCGATC
sgRNA_00102	CRE10162	chr19:12721740-12721759	GTGCTACGTCACTGTGCGAT
sgRNA_00103	CRE10162	chr19:12721818-12721837	GGTACAGCGCATCCGATGCA
sgRNA_00104	CRE10162	chr19:12721794-12721813	TACAGCAACCTGACGCGTCA
sgRNA_00105	CRE10162	chr19:12722087-12722106	GCACGATCTGGGAAAGACGC
sgRNA_00106	CRE10185	chr19:13049088-13049107	CGCGCGCGTCGTTGCCCATC
sgRNA_00107	CRE10185	chr19:13049086-13049105	CAGATGGGCAACGACGCGCG
sgRNA_00108	CRE10185	chr19:13049275-13049294	CTAACATAGTGAACCGACGA
sgRNA_00109	CRE10185	chr19:13049201-13049220	GGTCGACCATCATTGGTCGG
sgRNA_00110	CRE10185	chr19:13049870-13049889	TGTGGCTCTCGGCAGATGTT
sgRNA_00111	CRE10197	chr19:13278522-13278541	GCTTGGTAAGCTCTGGAGCC
sgRNA_00112	CRE10197	chr19:13278523-13278542	CTTGGTAAGCTCTGGAGCCT
sgRNA_00113	CRE10197	chr19:13278551-13278570	AGGTTGGCAGCGAGCTGGCC
sgRNA_00114	CRE10197	chr19:13278731-13278750	AGGATGAGGTGGCGGTAGGT
sgRNA_00115	CRE10197	chr19:13278860-13278879	GTTTATAAGGTAGTGTCCGC
sgRNA_00116	CRE102	chr1:6685069-6685088	GCCCGGAGCACCCCTTTACG
sgRNA_00117	CRE102	chr1:6685083-6685102	GACCCGGGGCGCCACGTAAA
sgRNA_00118	CRE102	chr1:6685082-6685101	ACCCGGGGCGCCACGTAAAG
sgRNA_00119	CRE102	chr1:6685271-6685290	CGACTTCGGCATCTCGAGCC
sgRNA_00120	CRE102	chr1:6685401-6685420	AAGGCCTCGGAGTCGGTCCG
sgRNA_00121	CRE10212	chr19:13991111-13991130	CAGCGACCCCGTGACGTCTC
sgRNA_00122	CRE10212	chr19:13991102-13991121	GCGGAGCCAGAGACGTCACG
sgRNA_00123	CRE10212	chr19:13991098-13991117	ACGTCTCTGGCTCCGCCGGG
sgRNA_00124	CRE10212	chr19:13991314-13991333	CTAGGAGGCTGCCTACACCT
sgRNA_00125	CRE10212	chr19:13991461-13991480	AGCTGAAATCGCCCTGTCCT
sgRNA_00126	CRE10223	chr19:14202205-14202224	CGCGCCAGGAGGCCGAGCGG
sgRNA_00127	CRE10223	chr19:14202200-14202219	CAGGAGGCCGAGCGGCGGCG
sgRNA_00128	CRE10223	chr19:14202201-14202220	CCAGGAGGCCGAGCGGCGGC
sgRNA_00129	CRE10223	chr19:14202405-14202424	GACCTGATCGGCCTGCACGC
sgRNA_00130	CRE10223	chr19:14202582-14202601	ATTCAACCTGTGTGCTGCGA
sgRNA_00131	CRE10235	chr19:14530227-14530246	GAGAGGCCGAAGCGGTGATT
sgRNA_00132	CRE10235	chr19:14530266-14530285	GGGAGATTATTGGCGGAGAC
sgRNA_00133	CRE10235	chr19:14530802-14530821	CGCTTGAACCCGAGAGGCGG
sgRNA_00134	CRE10235	chr19:14530236-14530255	ACAGGACCCAATCACCGCTT
sgRNA_00135	CRE1024	chr1:111459400-111459419	GCTGTATTAGATAGACCTCA
sgRNA_00136	CRE1024	chr1:111459518-111459537	AAGTTGGACAAAGTCACAGC
sgRNA_00137	CRE1024	chr1:111459534-111459553	ATAATTTAGTTTAGACAAGT
sgRNA_00138	CRE1024	chr1:111459762-111459781	CCTGATGCTAAACATAACTC
sgRNA_00139	CRE1024	chr1:111459629-111459648	TTTTTTACACTAGCGAGTTC
sgRNA_00140	CRE1024	chr1:111459561-111459580	TCTTGTGGCACACCCTAAGC
sgRNA_00141	CRE1024	chr1:111459630-111459649	TTTTTACACTAGCGAGTTCA
sgRNA_00142	CRE1024	chr1:111459702-111459721	AGGGGAAACAATTGCTAGAC
sgRNA_00143	CRE1024	chr1:111459664-111459683	TATTTGCTGACTCACCTTGT
sgRNA_00144	CRE10245	chr19:14800548-14800567	CCCGCCCATCAGCCATCGGA
sgRNA_00145	CRE10245	chr19:14800776-14800795	AGTTTCTCTGCCGCCGCCTA
sgRNA_00146	CRE10245	chr19:14800785-14800804	GCCGCCGCCTAAGGCTACCC
sgRNA_00147	CRE10245	chr19:14800789-14800808	GCCAGGGTAGCCTTAGGCGG
sgRNA_00148	CRE10245	chr19:14800918-14800937	GCGGTGCGGCACGGCACGGT
sgRNA_00149	CRE10259	chr19:15574645-15574664	AGGAGTTGCCGGGGTCCTGT
sgRNA_00150	CRE10259	chr19:15574755-15574774	CTGTATGGTTGATGCTCCGG
sgRNA_00151	CRE10259	chr19:15574752-15574771	TGTCTGTATGGTTGATGCTC
sgRNA_00152	CRE10259	chr19:15574777-15574796	GCAGACAAAACCCAAGCATC
sgRNA_00153	CRE10259	chr19:15574961-15574980	ACCCGACGGAATATCGAGCG
sgRNA_00154	CRE10263	chr19:15947516-15947535	TGGGGCGACAGTCACTGCGC
sgRNA_00155	CRE10263	chr19:15947833-15947852	GGGGTCTTTGCTGCTCGCGC
sgRNA_00156	CRE10263	chr19:15947880-15947899	GCTGTGGAAGCTTCAGTTTC
sgRNA_00157	CRE10263	chr19:15947893-15947912	CCACAGCCCGCCACGTCCCC
sgRNA_00158	CRE10263	chr19:15948045-15948064	TTGCCAGGAACCGCCCATTT
sgRNA_00159	CRE10268	chr19:16188516-16188535	CCACGCCTGAGATTTACTCC
sgRNA_00160	CRE10268	chr19:16189011-16189030	CTCCAAAATGGAGGTTGAGC
sgRNA_00161	CRE10268	chr19:16189568-16189587	AAGGATGCTTCTTTCCGTCT
sgRNA_00162	CRE10268	chr19:16189567-16189586	AAAGGATGCTTCTTTCCGTC
sgRNA_00163	CRE10268	chr19:16189498-16189517	GTTGGGAGAGAAGATGTTTT
sgRNA_00164	CRE10288	chr19:16830162-16830181	GGTCTTGAATGCCTGACCTC
sgRNA_00165	CRE10288	chr19:16830387-16830406	GCAGAGTAGTGAAGCGTCAC
sgRNA_00166	CRE10288	chr19:16830393-16830412	TAGTGAAGCGTCACAGGCAA
sgRNA_00167	CRE10288	chr19:16830392-16830411	GTAGTGAAGCGTCACAGGCA
sgRNA_00168	CRE10288	chr19:16830553-16830572	TACGAGGAGCCGTATCAGCC
sgRNA_00169	CRE10290	chr19:16999661-16999680	GGAAGCATCTGCGGTTCAAG
sgRNA_00170	CRE10290	chr19:16999662-16999681	TTGAACCGCAGATGCTTCCT
sgRNA_00171	CRE10290	chr19:16999661-16999680	CTTGAACCGCAGATGCTTCC
sgRNA_00172	CRE10290	chr19:16999817-16999836	ACTCCAGTCCTCCCACGGGC
sgRNA_00173	CRE10290	chr19:16999986-17000005	AGCCTGAGTGCAGTCATGTG
sgRNA_00174	CRE10293	chr19:17186162-17186181	CTGGATTTGTAGACGCCATA
sgRNA_00175	CRE10293	chr19:17186382-17186401	GACAGGCGAAGCGCGCGTCT
sgRNA_00176	CRE10293	chr19:17186381-17186400	ACAGGCGAAGCGCGCGTCTG
sgRNA_00177	CRE10293	chr19:17186383-17186402	GGACAGGCGAAGCGCGCGTC
sgRNA_00178	CRE10293	chr19:17186703-17186722	GAGCTCGAGTCGCCAACCCG
sgRNA_00179	CRE10311	chr19:17516514-17516533	CTCTTGCATGAGGCACCTAC
sgRNA_00180	CRE10311	chr19:17516530-17516549	CTACAGGCAGAGGATTAATT
sgRNA_00181	CRE10311	chr19:17516601-17516620	GGCCCAAGGGCTTTTAAAGC
sgRNA_00182	CRE10311	chr19:17516600-17516619	GCCCAAGGGCTTTTAAAGCA
sgRNA_00183	CRE10311	chr19:17516927-17516946	GTCCCCACCGAGGGGACTAT
sgRNA_00184	CRE10323	chr19:17862142-17862161	AAACAAGAGGCGCTTGAACC
sgRNA_00185	CRE10323	chr19:17862336-17862355	TGGCGCCTGCCCCGTCAGAC
sgRNA_00186	CRE10323	chr19:17862337-17862356	GGCGCCTGCCCCGTCAGACA
sgRNA_00187	CRE10323	chr19:17862299-17862318	CACTTCCGTCAGCACCAAGT
sgRNA_00188	CRE10323	chr19:17862420-17862439	ATCTCGCCTTGGCCCCCCTC
sgRNA_00189	CRE10325	chr19:17953183-17953202	CTTGGTGGCCACGACGGGCT
sgRNA_00190	CRE10325	chr19:17953344-17953363	TGACGCGGAGGCGTATTCGG
sgRNA_00191	CRE10325	chr19:17953283-17953302	GGCAGACCGGCACTCGCTCA
sgRNA_00192	CRE10325	chr19:17953274-17953293	ACTTGGCCATGAGCGAGTGC
sgRNA_00193	CRE10325	chr19:17953451-17953470	GGGACCCCTCCCGACGCTGA
sgRNA_00194	CRE1034	chr1:111991679-111991698	GAGGCTGCGCGGTACCGGTC
sgRNA_00195	CRE1034	chr1:111991957-111991976	GGCTGTCGCCCTCATGCGAT
sgRNA_00196	CRE1034	chr1:111991958-111991977	TATCGCATGAGGGCGACAGC
sgRNA_00197	CRE1034	chr1:111991969-111991988	CGCTGAGAGCCTATCGCATG
sgRNA_00198	CRE1034	chr1:111992240-111992259	GATTGGAAAGAAGCGAATCT
sgRNA_00199	CRE10344	chr19:18314997-18315016	CCTAGCGTGTGCATCCAGTA
sgRNA_00200	CRE10344	chr19:18315000-18315019	CCCTACTGGATGCACACGCT
sgRNA_00201	CRE10344	chr19:18314998-18315017	CTAGCGTGTGCATCCAGTAG
sgRNA_00202	CRE10344	chr19:18315384-18315403	TTTTGAACCCCATATATGTG
sgRNA_00203	CRE10344	chr19:18315623-18315642	TCTTCTTGATGACGGGGCGC
sgRNA_00204	CRE10346	chr19:18390594-18390613	ACAGAAAACCGGGCGAACCA
sgRNA_00205	CRE10346	chr19:18390797-18390816	TTCTACTCGGGAACAAACGT
sgRNA_00206	CRE10346	chr19:18390806-18390825	CCCGAGTAGAAACATAAATA
sgRNA_00207	CRE10346	chr19:18390805-18390824	TCCCGAGTAGAAACATAAAT
sgRNA_00208	CRE10346	chr19:18390930-18390949	TTTGTACACCGCGCCGCGGA
sgRNA_00209	CRE10357	chr19:18543840-18543859	CCGGCAGGGCTAATGTGAGT
sgRNA_00210	CRE10357	chr19:18544050-18544069	ACGGGCCCGGAAGGCAACGT
sgRNA_00211	CRE10357	chr19:18544051-18544070	CACGGGCCCGGAAGGCAACG
sgRNA_00212	CRE10357	chr19:18544046-18544065	GCCCGGAAGGCAACGTGGGC
sgRNA_00213	CRE10357	chr19:18544311-18544330	TTGCGAGGGTCGTTGGCCCC
sgRNA_00214	CRE10362	chr19:18699673-18699692	CTCGCGTCCCCGAGCTTCGG
sgRNA_00215	CRE10362	chr19:18699676-18699695	CTCCTCGCGTCCCCGAGCTT
sgRNA_00216	CRE10362	chr19:18699861-18699880	CGCGCAGGGCTTCCGCCGAC
sgRNA_00217	CRE10362	chr19:18699864-18699883	GCAGGGCTTCCGCCGACTGG
sgRNA_00218	CRE10362	chr19:18700221-18700240	AGGTGGTTGGCGCCGGTGCA
sgRNA_00219	CRE10369	chr19:19144148-19144167	GGGCTCCGTGATGGCGTCGC
sgRNA_00220	CRE10369	chr19:19144379-19144398	TGCGCACCAGGACTCGGCGG
sgRNA_00221	CRE10369	chr19:19144419-19144438	CGCGCTTGCGCAAGAGAGCC
sgRNA_00222	CRE10369	chr19:19144420-19144439	GCGCGCTTGCGCAAGAGAGC
sgRNA_00223	CRE10369	chr19:19144808-19144827	TGGCGCGACCCTCGGGTACG
sgRNA_00224	CRE10378	chr19:19496589-19496608	GATTTCGCCTCGCACACTTC
sgRNA_00225	CRE10378	chr19:19496562-19496581	AGGCGCGTCTCTCCGAGTGA
sgRNA_00226	CRE10378	chr19:19496567-19496586	CGGAGAGACGCGCCTCAACC
sgRNA_00227	CRE10378	chr19:19496780-19496799	CGACCGACCGACCGACTGCG
sgRNA_00228	CRE10378	chr19:19497024-19497043	AAACTCGGCCAAGGTAGTGC
sgRNA_00229	CRE10392	chr19:19976716-19976735	GGACGGGCCTCTATAAGCAC
sgRNA_00230	CRE10392	chr19:19976706-19976725	TCTGTGTCCTGTGCTTATAG
sgRNA_00231	CRE10392	chr19:19976690-19976709	CAGAACACTGAGGATAAACC
sgRNA_00232	CRE10392	chr19:19976966-19976985	GGCGGCTGCGGTGACATCCG
sgRNA_00233	CRE10392	chr19:19977211-19977230	CTGTGAAATTTTCTAAGTGC
sgRNA_00234	CRE10393	chr19:20011564-20011583	AGCTGCAGCCTTTTCAGCCA
sgRNA_00235	CRE10393	chr19:20011797-20011816	TCTGTGTCCTGTGCTCCTAC
sgRNA_00236	CRE10393	chr19:20011788-20011807	CAGGACACAGAGTAGTGAAG
sgRNA_00237	CRE10393	chr19:20011807-20011826	GGCTGGGCCTGTAGGAGCAC
sgRNA_00238	CRE10393	chr19:20012002-20012021	AAGAACTCCGGCGCAGATTG
sgRNA_00239	CRE10398	chr19:20348756-20348775	ATGAACCCACATCCCGAGTC
sgRNA_00240	CRE10398	chr19:20348976-20348995	AGAACTTGGGGCGCACATTG
sgRNA_00241	CRE10398	chr19:20348993-20349012	TTGTGGAGCTGACTGCGAAG
sgRNA_00242	CRE10398	chr19:20348968-20348987	GCCCCAAGTTCTCCTTGCCC
sgRNA_00243	CRE10398	chr19:20349207-20349226	GAAGACGAGACCTGAAACGC
sgRNA_00244	CRE10399	chr19:20606808-20606827	CCTTGAGGTAAAGGGTTGTT
sgRNA_00245	CRE10399	chr19:20607113-20607132	ATGGCGGGTGCTCTATAAGC
sgRNA_00246	CRE10399	chr19:20607107-20607126	GGTGCTCTATAAGCCGGTCC
sgRNA_00247	CRE10399	chr19:20607106-20607125	GTGCTCTATAAGCCGGTCCC
sgRNA_00248	CRE10399	chr19:20607358-20607377	ACCTCGTGATCCGCCCGCCT
sgRNA_00249	CRE10400	chr19:20748090-20748109	TTCATGAATGGGAAGAGCTT
sgRNA_00250	CRE10400	chr19:20748284-20748303	AGTCCCGTTCAGCCATAATT
sgRNA_00251	CRE10400	chr19:20748281-20748300	CCCGTTCAGCCATAATTTGG
sgRNA_00252	CRE10400	chr19:20748340-20748359	TTGTGGAGCTGACTGCGCAG
sgRNA_00253	CRE10400	chr19:20748570-20748589	AGCTCCGGCTGCAGAGACAA
sgRNA_00254	CRE10401	chr19:20844029-20844048	TCACTGCGCGGTGACTACCC
sgRNA_00255	CRE10401	chr19:20844190-20844209	TGGTTGGAACCGGTGAAAAG
sgRNA_00256	CRE10401	chr19:20844178-20844197	CCGCCACAGCCACTTTTCAC
sgRNA_00257	CRE10401	chr19:20844180-20844199	CGGTGAAAAGTGGCTGTGGC
sgRNA_00258	CRE10401	chr19:20844396-20844415	GAGCGAAGAGGACGGTTTCC
sgRNA_00259	CRE10402	chr19:20959135-20959154	AGAGCAGTGAACAGACGACC
sgRNA_00260	CRE10402	chr19:20959346-20959365	AGCTGGGTAAGGAGAATTCG
sgRNA_00261	CRE10402	chr19:20959348-20959367	AGAGCTGGGTAAGGAGAATT
sgRNA_00262	CRE10402	chr19:20959334-20959353	AGAATTCGGGGTGCAGATTG
sgRNA_00263	CRE10402	chr19:20959546-20959565	GAGAATGCTGACTCGCGGTG
sgRNA_00264	CRE10412	chr19:21657625-21657644	AAGGGCCCGCCAAATGCCGG
sgRNA_00265	CRE10412	chr19:21657775-21657794	GCCGGTCCAGCCGGTTTCAC
sgRNA_00266	CRE10412	chr19:21657771-21657790	GCCTGTGAAACCGGCTGGAC
sgRNA_00267	CRE10412	chr19:21657762-21657781	GGGAGAGCGGCCTGTGAAAC
sgRNA_00268	CRE10412	chr19:21657914-21657933	GTTTCTGCGCGGCGCCAGTC
sgRNA_00269	CRE1042	chr1:112938563-112938582	GAAAGTTGCAGACCCCGAGC
sgRNA_00270	CRE1042	chr1:112938640-112938659	AAGTGACGCGAGCTCAATCC
sgRNA_00271	CRE1042	chr1:112938639-112938658	GATTGAGCTCGCGTCACTTC
sgRNA_00272	CRE1042	chr1:112938873-112938892	GAGCCCGGAGCGTCGTGGAA
sgRNA_00273	CRE1042	chr1:112938868-112938887	GAGCGGAGCCCGGAGCGTCG
sgRNA_00274	CRE10427	chr19:23577941-23577960	CTGCGTTGACAGGCGGGCTC
sgRNA_00275	CRE10427	chr19:23578163-23578182	TGTGGCTCTCCAATACCTGC
sgRNA_00276	CRE10427	chr19:23578305-23578324	GGCACAAAGCTGGAGCGGAC
sgRNA_00277	CRE10427	chr19:23578304-23578323	GCACAAAGCTGGAGCGGACA
sgRNA_00278	CRE10427	chr19:23578315-23578334	TGTCCAATCAGGCACAAAGC
sgRNA_00279	CRE1044	chr1:113161804-113161823	TTCAGGTCCGCCACTATCCC
sgRNA_00280	CRE1044	chr1:113161983-113162002	TTGGAAGCGGTAACACTTCG
sgRNA_00281	CRE1044	chr1:113162146-113162165	ACAGCTATTTGGTCGGATGG
sgRNA_00282	CRE1044	chr1:113162143-113162162	GCAACAGCTATTTGGTCGGA
sgRNA_00283	CRE1044	chr1:113162179-113162198	CAGCGTGTTTCGATTATTCT
sgRNA_00284	CRE10446	chr19:28284376-28284395	CTAGAGGACGCCCGTTCCAA
sgRNA_00285	CRE10446	chr19:28284813-28284832	CGGTTCCAGCCGTTAGTCAC
sgRNA_00286	CRE10446	chr19:28284821-28284840	GCCGCCCTGTGACTAACGGC
sgRNA_00287	CRE10446	chr19:28284814-28284833	GGTTCCAGCCGTTAGTCACA
sgRNA_00288	CRE10446	chr19:28285087-28285106	GGAGGTTACGGATACGTTAA
sgRNA_00289	CRE10450	chr19:29703615-29703634	AAGCCGGCGGACGCGAGTCC
sgRNA_00290	CRE10450	chr19:29703799-29703818	CTCAATGGTGAGCCGGGGCG
sgRNA_00291	CRE10450	chr19:29703987-29704006	GGGCGCGAACGGGCCTGAGC
sgRNA_00292	CRE10450	chr19:29703986-29704005	CGGGCGCGAACGGGCCTGAG
sgRNA_00293	CRE10450	chr19:29703977-29703996	CCGACAGGACGGGCGCGAAC
sgRNA_00294	CRE10458	chr19:30432819-30432838	GGGGCACTCAAGGCGACACG
sgRNA_00295	CRE10458	chr19:30433120-30433139	TTCCGGCGTGCCGCGAGAGG
sgRNA_00296	CRE10458	chr19:30433110-30433129	CACGCCGGAAGCAAGCGCGC
sgRNA_00297	CRE10458	chr19:30433117-30433136	TGCTTCCGGCGTGCCGCGAG
sgRNA_00298	CRE10458	chr19:30433368-30433387	CGCGGGCGCTGGGCAACTGC
sgRNA_00299	CRE10476	chr19:34625210-34625229	GTAGGCGTCCCGCTCCTGAC
sgRNA_00300	CRE10476	chr19:34625440-34625459	CTCACTGCGCCTGCGCCCGA
sgRNA_00301	CRE10476	chr19:34625470-34625489	CAGGCTGGGAAGTAGCGTTA
sgRNA_00302	CRE10476	chr19:34625525-34625544	CGCTGCCCGCACGTTTGTCG
sgRNA_00303	CRE10476	chr19:34625533-34625552	AGGAGCCGCGACAAACGTGC
sgRNA_00304	CRE10488	chr19:35168279-35168298	GCCATGGCCCTTATAAGTAG
sgRNA_00305	CRE10488	chr19:35168430-35168449	CGCCGCGGGCAAACCGGTCA
sgRNA_00306	CRE10488	chr19:35168404-35168423	TGTAAGTAGCTTAACCGCCT
sgRNA_00307	CRE10488	chr19:35168405-35168424	TTGTAAGTAGCTTAACCGCC
sgRNA_00308	CRE10488	chr19:35168685-35168704	GACCTGACGCGCCGCGTAGC
sgRNA_00309	CRE10489	chr19:35225091-35225110	TTTCCCAGAATCATCCGCGC
sgRNA_00310	CRE10489	chr19:35225229-35225248	GCCCGCTCACCAGCGACGCG
sgRNA_00311	CRE10489	chr19:35225228-35225247	TGCCCGCTCACCAGCGACGC
sgRNA_00312	CRE10489	chr19:35225227-35225246	CGTCGCTGGTGAGCGGGCAA
sgRNA_00313	CRE10489	chr19:35225506-35225525	GTTACACAACTGTAGAGCGC
sgRNA_00314	CRE10496	chr19:35528932-35528951	GCTCCTCCCGCAGGGAAGCT
sgRNA_00315	CRE10496	chr19:35529043-35529062	TGTGAGTGGGGCACTTTCTT
sgRNA_00316	CRE10496	chr19:35529011-35529030	AGCACTGGTGCCATCTGCAC
sgRNA_00317	CRE10496	chr19:35529069-35529088	GGAGGCCATTTGAGGACAGC
sgRNA_00318	CRE10496	chr19:35529194-35529213	TAAAGGGAACGCGTTCAGCC
sgRNA_00319	CRE105	chr1:6844622-6844641	ACCATGAGTCATCCGCTCCG
sgRNA_00320	CRE105	chr1:6844840-6844859	CTCCTAGGCAGTCGGACTCC
sgRNA_00321	CRE105	chr1:6845071-6845090	CTCATGACGGTCACGCTCGG
sgRNA_00322	CRE105	chr1:6845070-6845089	CCTCATGACGGTCACGCTCG
sgRNA_00323	CRE105	chr1:6845074-6845093	ATGACGGTCACGCTCGGGGG
sgRNA_00324	CRE10503	chr19:35758738-35758757	CGACTAAACTTTCCCGACTC
sgRNA_00325	CRE10503	chr19:35759108-35759127	GGCCAGCCTGCGGTGCGCGA
sgRNA_00326	CRE10503	chr19:35759077-35759096	CGGGGCGCATGCGCACGCCT
sgRNA_00327	CRE10503	chr19:35759099-35759118	CCTCCGCCTTCGCGCACCGC
sgRNA_00328	CRE10503	chr19:35759354-35759373	CGCGCGCGCTGGTCTGTCTC
sgRNA_00329	CRE10512	chr19:36119545-36119564	GTCGGGTGTCAACCTACTCC
sgRNA_00330	CRE10512	chr19:36119819-36119838	GACACACGAACGCAAGAACC
sgRNA_00331	CRE10512	chr19:36119818-36119837	ACACACGAACGCAAGAACCT
sgRNA_00332	CRE10512	chr19:36119778-36119797	GAGAGGCGGCCCCGCTTTCC
sgRNA_00333	CRE10512	chr19:36119987-36120006	GTAGACAGCAGAACCAGCGG
sgRNA_00334	CRE10516	chr19:36208551-36208570	AGACCCGGCAACCCGCTTTC
sgRNA_00335	CRE10516	chr19:36208552-36208571	GACCCGGCAACCCGCTTTCC
sgRNA_00336	CRE10516	chr19:36208665-36208684	CCGCAGAGGGGCGAACCGCG
sgRNA_00337	CRE10516	chr19:36208664-36208683	CGCAGAGGGGCGAACCGCGG
sgRNA_00338	CRE10516	chr19:36208919-36208938	GCCCGCCGCCGCCGCCATCT
sgRNA_00339	CRE10526	chr19:36485685-36485704	GTTGAGGTGGGAGGATCGCT
sgRNA_00340	CRE10526	chr19:36485986-36486005	CAGTTACGTAACAGCCGGCT
sgRNA_00341	CRE10526	chr19:36485987-36486006	GCAGTTACGTAACAGCCGGC
sgRNA_00342	CRE10526	chr19:36485991-36486010	CGTTGCAGTTACGTAACAGC
sgRNA_00343	CRE10526	chr19:36486133-36486152	AGCGAACGACCTGCGAACCG
sgRNA_00344	CRE10529	chr19:36545025-36545044	TTCTACAAGTGAGCGCAGCG
sgRNA_00345	CRE10529	chr19:36545379-36545398	CGACTTTCATCACGTGTTGG
sgRNA_00346	CRE10529	chr19:36545354-36545373	ACGAAGGGCCGGCTTTGCGC
sgRNA_00347	CRE10529	chr19:36545377-36545396	CCCGACTTTCATCACGTGTT
sgRNA_00348	CRE10529	chr19:36545704-36545723	CATTGGTTCTAAGCGCCGCC
sgRNA_00349	CRE10552	chr19:37742825-37742844	CACTATACCCGCCGTGCGCC
sgRNA_00350	CRE10552	chr19:37742944-37742963	CCGTGGCGATGGCCGATTGA
sgRNA_00351	CRE10552	chr19:37742941-37742960	CCTTCAATCGGCCATCGCCA
sgRNA_00352	CRE10552	chr19:37742939-37742958	GCGATGGCCGATTGAAGGCC
sgRNA_00353	CRE10552	chr19:37743053-37743072	GACCTCTGACACATAGGATC
sgRNA_00354	CRE1056	chr1:114413841-114413860	TTCCCCAGGTATCTAAGTTG
sgRNA_00355	CRE1056	chr1:114414322-114414341	CGGCAGCAGTGGCTTTTTGG
sgRNA_00356	CRE1056	chr1:114414314-114414333	GTGGCTTTTTGGAGGTGTCT
sgRNA_00357	CRE1056	chr1:114414325-114414344	AGGCGGCAGCAGTGGCTTTT
sgRNA_00358	CRE1056	chr1:114414572-114414591	TGAGTTTTGCATATGGGTGA
sgRNA_00359	CRE10567	chr19:38397566-38397585	GAGAGGTTCCGCCGAATGAA
sgRNA_00360	CRE10567	chr19:38397765-38397784	GCAGCGCGGCGGTGCGCCTA
sgRNA_00361	CRE10567	chr19:38397818-38397837	TTTGAGTTCGCGGCCGGCTA
sgRNA_00362	CRE10567	chr19:38397803-38397822	TCAAAAAGAGAATGGCGCGC
sgRNA_00363	CRE10567	chr19:38398069-38398088	CGTCCGCCCGCGCTGACCCT
sgRNA_00364	CRE10613	chr19:39903072-39903091	GGAAAAGTCCGCGAGGCGTT
sgRNA_00365	CRE10613	chr19:39903083-39903102	CCTACATTCCAAACGCCTCG
sgRNA_00366	CRE10613	chr19:39903052-39903071	CTTTTACAGCAAGGGCCGCG
sgRNA_00367	CRE10613	chr19:39903310-39903329	GACGGCGGCGGCGCCACATC
sgRNA_00368	CRE10613	chr19:39903543-39903562	GTTCTTGAAACGGGGATACG
sgRNA_00369	CRE10626	chr19:40561768-40561787	CAGCAGGAGCCTAGTACCAC
sgRNA_00370	CRE10626	chr19:40562019-40562038	GGACTCGAACCTGACCGACC
sgRNA_00371	CRE10626	chr19:40562007-40562026	CCCGCACTGCCGGGTCGGTC
sgRNA_00372	CRE10626	chr19:40562011-40562030	ACCTGACCGACCCGGCAGTG
sgRNA_00373	CRE10626	chr19:40562269-40562288	TTGTGGGAGTTCCAGACCGT
sgRNA_00374	CRE10630	chr19:40854176-40854195	CCACCCGTCCCTACCGCAAC
sgRNA_00375	CRE10630	chr19:40854445-40854464	GGTTACGACTGCACTCTCGC
sgRNA_00376	CRE10630	chr19:40854465-40854484	GTCACGTGACCGCCCACCGT
sgRNA_00377	CRE10630	chr19:40854435-40854454	GCACTCTCGCTGGTGTCGGT
sgRNA_00378	CRE10630	chr19:40854565-40854584	GCGCACTACGGCTAGACTGC
sgRNA_00379	CRE10632	chr19:40926774-40926793	GTCCGAGTCCCATTTGCCCG
sgRNA_00380	CRE10632	chr19:40926785-40926804	GACTCCAGCCCCGGGCAAAT
sgRNA_00381	CRE10632	chr19:40926772-40926791	CAGTCCGAGTCCCATTTGCC
sgRNA_00382	CRE10632	chr19:40926877-40926896	ATGAGGCGGGCCGCGGAAGC
sgRNA_00383	CRE10632	chr19:40927062-40927081	TGAGGGAAACGCCGCCATCG
sgRNA_00384	CRE10635	chr19:40949401-40949420	GCAAATTTAGAGCCGGAGTC
sgRNA_00385	CRE10635	chr19:40949641-40949660	AGAGTTCAATGTTCGGGTCT
sgRNA_00386	CRE10635	chr19:40949622-40949641	TTGGAGCCGGACAGCGAGTT
sgRNA_00387	CRE10635	chr19:40949587-40949606	TCCTGACTTTCAAACGCCCC
sgRNA_00388	CRE10635	chr19:40949790-40949809	AGCCCCGAATTCAACCCGTC
sgRNA_00389	CRE10640	chr19:41082498-41082517	TCCACATAAAAGGGTACATC
sgRNA_00390	CRE10640	chr19:41082700-41082719	CTCCAGGAGTCACTAGCGAT
sgRNA_00391	CRE10640	chr19:41082754-41082773	TCCGGGTGCACACCCGGAAG
sgRNA_00392	CRE10640	chr19:41082695-41082714	GTCCAATCGCTAGTGACTCC
sgRNA_00393	CRE10640	chr19:41082919-41082938	CGCTTCCCGCCCCCGAGGAT
sgRNA_00394	CRE10654	chr19:41816076-41816095	GCACCGAAGTTCCGGGCCTA
sgRNA_00395	CRE10654	chr19:41816138-41816157	AAAGTGTCTCTTGCGTGCGT
sgRNA_00396	CRE10654	chr19:41816185-41816204	CGGACTTTTCAACCGCCCGG
sgRNA_00397	CRE10654	chr19:41816184-41816203	GGACTTTTCAACCGCCCGGC
sgRNA_00398	CRE10654	chr19:41816423-41816442	AAGAAGGTCAGCCCGCGACA
sgRNA_00399	CRE10659	chr19:41903023-41903042	GCACTCGGTTGCACAGTACA
sgRNA_00400	CRE10659	chr19:41903348-41903367	GGTAAACGCTAAGCCACGTG
sgRNA_00401	CRE10659	chr19:41903396-41903415	CCTAACTCTGGCAACGCCAT
sgRNA_00402	CRE10659	chr19:41903355-41903374	CTTAGCGTTTACCAACAATC
sgRNA_00403	CRE10659	chr19:41903530-41903549	AGTAACTACAATGAGGCGAT
sgRNA_00404	CRE10667	chr19:42038254-42038273	TGTTGGTTTCATCATAGAGG
sgRNA_00405	CRE10667	chr19:42038257-42038276	TTGTGTTGGTTTCATCATAG
sgRNA_00406	CRE10667	chr19:42038208-42038227	AGCAGACGTGTTGTGTTTTT
sgRNA_00407	CRE10667	chr19:42038397-42038416	AAACTCTCTCTGCTCAGTGC
sgRNA_00408	CRE10667	chr19:42038511-42038530	GGTCCTGGGCACCAGACTTG
sgRNA_00409	CRE10692	chr19:42758156-42758175	ACTTTGCGCCCGAGCGCGCA
sgRNA_00410	CRE10692	chr19:42758492-42758511	GTTTCCGACCTTAGAACGCG
sgRNA_00411	CRE10692	chr19:42758481-42758500	CCTTAAAGCCGCGCGTTCTA
sgRNA_00412	CRE10692	chr19:42758481-42758500	TAGAACGCGCGGCTTTAAGG
sgRNA_00413	CRE10692	chr19:42758645-42758664	TCTAGGAGGAGGGCGTGAGT
sgRNA_00414	CRE10703	chr19:43967528-43967547	CGGGGTCATCGATAGTGCCG
sgRNA_00415	CRE10703	chr19:43967529-43967548	GCGGGGTCATCGATAGTGCC
sgRNA_00416	CRE10703	chr19:43967530-43967549	GGCGGGGTCATCGATAGTGC
sgRNA_00417	CRE10703	chr19:43967853-43967872	GGCCGCGGTCATTCTTGCCG
sgRNA_00418	CRE10703	chr19:43968085-43968104	GCGGAAAGAACGACCGAAGC
sgRNA_00419	CRE10705	chr19:44007913-44007932	CAGTAGTCTCTGCTATCACT
sgRNA_00420	CRE10705	chr19:44008258-44008277	TTCGCGTCCCCATGGCCGCT
sgRNA_00421	CRE10705	chr19:44008257-44008276	CTTCGCGTCCCCATGGCCGC
sgRNA_00422	CRE10705	chr19:44008405-44008424	GATGGAACTGAGCGTTACGG
sgRNA_00423	CRE10705	chr19:44008402-44008421	AAGGATGGAACTGAGCGTTA
sgRNA_00424	CRE10721	chr19:44405568-44405587	CAAGTGTCTGTGAGGCGATA
sgRNA_00425	CRE10721	chr19:44405921-44405940	AGACGATCTACTCACCACGT
sgRNA_00426	CRE10721	chr19:44405923-44405942	ACGATCTACTCACCACGTAG
sgRNA_00427	CRE10721	chr19:44405922-44405941	GACGATCTACTCACCACGTA
sgRNA_00428	CRE10721	chr19:44406045-44406064	CTACAGAATGGCGGGCGCCG
sgRNA_00429	CRE1073	chr1:116518709-116518728	GCCCCCGCATTAAACTGGTT
sgRNA_00430	CRE1073	chr1:116518714-116518733	GCCCAAACCAGTTTAATGCG
sgRNA_00431	CRE1073	chr1:116518713-116518732	CCCAAACCAGTTTAATGCGG
sgRNA_00432	CRE1073	chr1:116518871-116518890	GCTGTCTGCGCCTTAAAGTG
sgRNA_00433	CRE1073	chr1:116519144-116519163	CGGCGGGTCCAAGCCGGTGC
sgRNA_00434	CRE10782	chr19:46194860-46194879	GTTCCAGCGATGCTCCGCCT
sgRNA_00435	CRE10782	chr19:46194988-46195007	ATGAGTTTGAGAACGGGCGT
sgRNA_00436	CRE10782	chr19:46194989-46195008	GATGAGTTTGAGAACGGGCG
sgRNA_00437	CRE10782	chr19:46194987-46195006	TGAGTTTGAGAACGGGCGTG
sgRNA_00438	CRE10782	chr19:46195142-46195161	AGCGTAGTGACCATCATGTG
sgRNA_00439	CRE10793	chr19:46389842-46389861	CGGGAAGCTGGCAACTAGGT
sgRNA_00440	CRE10793	chr19:46389995-46390014	TGCTAAAAGAGTGGGGCGAC
sgRNA_00441	CRE10793	chr19:46389972-46389991	AAACAACTGAGACAAGGCTC
sgRNA_00442	CRE10793	chr19:46389988-46390007	GTTTCTCTGCTAAAAGAGTG
sgRNA_00443	CRE10793	chr19:46390382-46390401	AACCTTGAGCGCTCACTACC
sgRNA_00444	CRE10794	chr19:46405724-46405743	AACGGGGGTCCCGTATCACA
sgRNA_00445	CRE10794	chr19:46406117-46406136	TTTTTGCGCGTGCGCCGTTG
sgRNA_00446	CRE10794	chr19:46406153-46406172	CGCGTGCCTCGGGTTGTACC
sgRNA_00447	CRE10794	chr19:46406142-46406161	TCGCGCGCATGCGCGTGCCT
sgRNA_00448	CRE10794	chr19:46406325-46406344	CCCCACCCACACAGTTGTCA
sgRNA_00449	CRE10805	chr19:47220228-47220247	AAGTTCGGTCGGGAGCCGTG
sgRNA_00450	CRE10805	chr19:47220483-47220502	CGGAGGTCCAGCCCCCAACT
sgRNA_00451	CRE10805	chr19:47220468-47220487	GGCCCGGGGCCTCCGAGTTG
sgRNA_00452	CRE10805	chr19:47220502-47220521	GCCTCCAGGGTCCGGGACAA
sgRNA_00453	CRE10805	chr19:47220631-47220650	TATCACCCACCGCCGGTCGC
sgRNA_00454	CRE10815	chr19:47551600-47551619	TCAAGGTCCCACGCGAGCCC
sgRNA_00455	CRE10815	chr19:47551810-47551829	CGACCTCCGGAAGCGAAGAC
sgRNA_00456	CRE10815	chr19:47551994-47552013	GAACTGTCCATTGGTCGGAA
sgRNA_00457	CRE10815	chr19:47551985-47552004	GTCCGGCGTGAACTGTCCAT
sgRNA_00458	CRE10815	chr19:47551990-47552009	GACCAATGGACAGTTCACGC
sgRNA_00459	CRE10817	chr19:47614711-47614730	GCCCCATTTTACCCCGACAG
sgRNA_00460	CRE10817	chr19:47614865-47614884	TGCCCTTTAGCAAAAACACG
sgRNA_00461	CRE10817	chr19:47614914-47614933	GGGGTTTTCATCAAAAGGGC
sgRNA_00462	CRE10817	chr19:47614871-47614890	CTTCCCCGTGTTTTTGCTAA
sgRNA_00463	CRE10817	chr19:47615031-47615050	CCTTGTAATTGGGGGTCATT
sgRNA_00464	CRE10819	chr19:47616482-47616501	GAGACCGCTTGCCCGAAGGC
sgRNA_00465	CRE10819	chr19:47616478-47616497	GGTAGAGACCGCTTGCCCGA
sgRNA_00466	CRE10819	chr19:47616485-47616504	ACCGCTTGCCCGAAGGCCGG
sgRNA_00467	CRE10819	chr19:47616665-47616684	TAGCCTAAGCCGATCGGGAC
sgRNA_00468	CRE10819	chr19:47616834-47616853	AACGACTTTCAGGAATTCGC
sgRNA_00469	CRE10836	chr19:48613785-48613804	TTGTGCTCCGGAATCCGGTG
sgRNA_00470	CRE10836	chr19:48613823-48613842	GCGACTACACCGCTAAGCGC
sgRNA_00471	CRE10836	chr19:48613822-48613841	CGACTACACCGCTAAGCGCA
sgRNA_00472	CRE10836	chr19:48613823-48613842	GCGCTTAGCGGTGTAGTCGC
sgRNA_00473	CRE10836	chr19:48614088-48614107	CCCGGAGCTATTTTCATCCG
sgRNA_00474	CRE10852	chr19:48972333-48972352	CCCGGAAAAGTGTCGCGCGG
sgRNA_00475	CRE10852	chr19:48972329-48972348	GCCTCCGCGCGACACTTTTC
sgRNA_00476	CRE10852	chr19:48972336-48972355	AGCCCCGGAAAAGTGTCGCG
sgRNA_00477	CRE10852	chr19:48972591-48972610	AGGGGCGGTTGGGCGACGAA
sgRNA_00478	CRE10852	chr19:48972836-48972855	ACGTTCGCGGCGGAACGTTC
sgRNA_00479	CRE10853	chr19:48983827-48983846	TGCGACGCCCGGAAAAACCT
sgRNA_00480	CRE10853	chr19:48984018-48984037	ACGGAGTCATCGACCCAAGA
sgRNA_00481	CRE10853	chr19:48984013-48984032	GGTCGATGACTCCGTTTCCC
sgRNA_00482	CRE10853	chr19:48984003-48984022	TCCGTTTCCCTGGCACCTGT
sgRNA_00483	CRE10853	chr19:48984157-48984176	GGAAGAGGCGCGGAGCCCGC
sgRNA_00484	CRE10863	chr19:49141102-49141121	GGAAAAGGGGCGCCGCTTAA
sgRNA_00485	CRE10863	chr19:49141165-49141184	AACCTCCGCTCTCGGTATTT
sgRNA_00486	CRE10863	chr19:49141104-49141123	AAAAGGGGCGCCGCTTAAAG
sgRNA_00487	CRE10863	chr19:49141347-49141366	CGGGCGGGTGCAATCCTCGA
sgRNA_00488	CRE10863	chr19:49141494-49141513	CTCGCAGACTTCCGACGGTA
sgRNA_00489	CRE10866	chr19:49217152-49217171	CTCAGCGGCTCTGACTCTGG
sgRNA_00490	CRE10866	chr19:49217476-49217495	GGGACGTGGTTCAGACTAAC
sgRNA_00491	CRE10866	chr19:49217500-49217519	CCTTCAAGGCTTCCTACCGC
sgRNA_00492	CRE10866	chr19:49217684-49217703	GCGGGACTGTCCTCGCGCCG
sgRNA_00493	CRE10866	chr19:49217630-49217649	CTGGCAGCCGCCCGGCGTCA
sgRNA_00494	CRE10876	chr19:49389581-49389600	GGAAATGTGGTTCTCACTGA
sgRNA_00495	CRE10876	chr19:49389732-49389751	CTGCTGCAATATTGCAAGTG
sgRNA_00496	CRE10876	chr19:49389730-49389749	CTCACTTGCAATATTGCAGC
sgRNA_00497	CRE10876	chr19:49389737-49389756	GCAATATTGCAGCAGGACTT
sgRNA_00498	CRE10876	chr19:49389844-49389863	GGAGAGGAGACCATACTTGC
sgRNA_00499	CRE1088	chr1:117664290-117664309	AGGGAATTGCAAGCCGCCGG
sgRNA_00500	CRE1088	chr1:117664468-117664487	GATGCTTAGTGGCGTCACTC
sgRNA_00501	CRE1088	chr1:117664511-117664530	TCTTCGCCAGTCCACTCACG
sgRNA_00502	CRE1088	chr1:117664465-117664484	GCTTAGTGGCGTCACTCTGG
sgRNA_00503	CRE1088	chr1:117664743-117664762	CGTTCGTGGGACGAGTCCGA
sgRNA_00504	CRE10880	chr19:49458091-49458110	TGAAGGACGCACGTTCAGCG
sgRNA_00505	CRE10880	chr19:49458089-49458108	CTGAACGTGCGTCCTTCACG
sgRNA_00506	CRE10880	chr19:49458089-49458108	CGTGAAGGACGCACGTTCAG
sgRNA_00507	CRE10880	chr19:49458261-49458280	GATCCCGGACGGGCCGGCGA
sgRNA_00508	CRE10880	chr19:49458481-49458500	AGTGGTGCGGGCGACAAGCC
sgRNA_00509	CRE10888	chr19:49660926-49660945	CGGGTCCCAGGCCGCGATAA
sgRNA_00510	CRE10888	chr19:49660917-49660936	TCTGTCCCCTTATCGCGGCC
sgRNA_00511	CRE10888	chr19:49661055-49661074	CTGGAAGCAGAGCCGGCGGA
sgRNA_00512	CRE10888	chr19:49661117-49661136	CCGGCACCACCATGCTGCCG
sgRNA_00513	CRE10888	chr19:49661230-49661249	CAGATTCCTGGGTCAGACGG
sgRNA_00514	CRE10895	chr19:49990501-49990520	GCAGCCTTCAGTCGCTTGAA
sgRNA_00515	CRE10895	chr19:49990700-49990719	CCGGATTGGACATTCGGAAG
sgRNA_00516	CRE10895	chr19:49990687-49990706	AATCCGGACATTCTTCCGGT
sgRNA_00517	CRE10895	chr19:49990701-49990720	CGGATTGGACATTCGGAAGA
sgRNA_00518	CRE10895	chr19:49991059-49991078	CGCGGCTCTCTTTAGGCCTA
sgRNA_00519	CRE10897	chr19:50016206-50016225	TGGACTCCTGGGTCCGAGGG
sgRNA_00520	CRE10897	chr19:50016402-50016421	AAGGGGCGTGGCGGAGCTCG
sgRNA_00521	CRE10897	chr19:50016428-50016447	ACTTGATAGGCTGAGAGTCC
sgRNA_00522	CRE10897	chr19:50016401-50016420	GAAGGGGCGTGGCGGAGCTC
sgRNA_00523	CRE10897	chr19:50016643-50016662	CCCATGCTGAGAGGACGACC
sgRNA_00524	CRE10904	chr19:50179688-50179707	CAAAGAGAGGTGGGCGTTCC
sgRNA_00525	CRE10904	chr19:50179875-50179894	GGAAAAACGGAATCGGTGAG
sgRNA_00526	CRE10904	chr19:50180161-50180180	CAAGACGCCCCTTTAGCGCG
sgRNA_00527	CRE10904	chr19:50180160-50180179	TCAAGACGCCCCTTTAGCGC
sgRNA_00528	CRE10904	chr19:50180122-50180141	GATTAGGAGGCGGGTCGTTT
sgRNA_00529	CRE10907	chr19:50269585-50269604	AAGAGGATTTCAGCAGTCGG
sgRNA_00530	CRE10907	chr19:50269966-50269985	GTTTGACCTGGCCGCGCGGA
sgRNA_00531	CRE10907	chr19:50269965-50269984	TGTTTGACCTGGCCGCGCGG
sgRNA_00532	CRE10907	chr19:50269967-50269986	TTTGACCTGGCCGCGCGGAG
sgRNA_00533	CRE10907	chr19:50270312-50270331	CAAGCGGGGACCGGGCGGAA
sgRNA_00534	CRE10909	chr19:50321292-50321311	CATCTTTGAGCGGGGCGTCC
sgRNA_00535	CRE10909	chr19:50321401-50321420	TTCTGAGTCTTCCACGCGGT
sgRNA_00536	CRE10909	chr19:50321402-50321421	TCTGAGTCTTCCACGCGGTG
sgRNA_00537	CRE10909	chr19:50321400-50321419	TTTCTGAGTCTTCCACGCGG
sgRNA_00538	CRE10909	chr19:50321677-50321696	AACCTGGGACCCTACTTCGA
sgRNA_00539	CRE10913	chr19:50380374-50380393	GAGTCACCGTCGCGAGAAAG
sgRNA_00540	CRE10913	chr19:50380743-50380762	GCCTGCGCACTCTCCGTAGC
sgRNA_00541	CRE10913	chr19:50380759-50380778	GCTGAAGGTGGATCCGGCTA
sgRNA_00542	CRE10913	chr19:50380790-50380809	GTGACTCCGATCCACCCTCG
sgRNA_00543	CRE10913	chr19:50381228-50381247	GCACGTCAGCATCCGAACGC
sgRNA_00544	CRE10917	chr19:50432752-50432771	GCGGGGAATCACGGTCGCGC
sgRNA_00545	CRE10917	chr19:50432952-50432971	GCACTGGTGGGCTACTGCGC
sgRNA_00546	CRE10917	chr19:50433173-50433192	GCTGTGAGCCAGAGCAACGT
sgRNA_00547	CRE10917	chr19:50433172-50433191	CTGTGAGCCAGAGCAACGTG
sgRNA_00548	CRE10917	chr19:50433223-50433242	AAGCCAGTCCCCGCCTCAGC
sgRNA_00549	CRE10923	chr19:50860388-50860407	GCATGAGGGGCGAGTTGAAA
sgRNA_00550	CRE10923	chr19:50860582-50860601	GAACCGCTAGGGCGGAAGCA
sgRNA_00551	CRE10923	chr19:50860516-50860535	CGGGTGGCGGCTGGGAAAAC
sgRNA_00552	CRE10923	chr19:50860583-50860602	GGAACCGCTAGGGCGGAAGC
sgRNA_00553	CRE10923	chr19:50860841-50860860	AAGCCTCGGGATGCGATTAA
sgRNA_00554	CRE10927	chr19:50887302-50887321	GATGCGCGCGCAACACCCGA
sgRNA_00555	CRE10927	chr19:50887416-50887435	TCATGGGGAGGCGGAGTTAA
sgRNA_00556	CRE10927	chr19:50887439-50887458	AATTTTTCAGCAAGGGGGCG
sgRNA_00557	CRE10927	chr19:50887465-50887484	CCCTCTCTCAGCTTCCGAAG
sgRNA_00558	CRE10927	chr19:50887721-50887740	AGATCTGAGAGACGGTTGCG
sgRNA_00559	CRE10929	chr19:50934969-50934988	CCGCGAGCCCCGCTAAGTTG
sgRNA_00560	CRE10929	chr19:50934971-50934990	TCCCGCGAGCCCCGCTAAGT
sgRNA_00561	CRE10929	chr19:50935068-50935087	GGAGAAATTTCCGGCTCGTA
sgRNA_00562	CRE10929	chr19:50935026-50935045	ACATGGAACTGACGCCGGAT
sgRNA_00563	CRE10929	chr19:50935347-50935366	CGGGAAGGGCGCCAACGTCC
sgRNA_00564	CRE10952	chr19:52390769-52390788	GTACTTAAAAAGGGGTCTGC
sgRNA_00565	CRE10952	chr19:52390955-52390974	TGCGAAACGAACTCCGAGCG
sgRNA_00566	CRE10952	chr19:52390948-52390967	AGTTCGTTTCGCAGTCGTGT
sgRNA_00567	CRE10952	chr19:52390996-52391015	GCGCGTGAGGTCCGTGTTGC
sgRNA_00568	CRE10952	chr19:52391186-52391205	CGCGACACTCGCAAGTTTCG
sgRNA_00569	CRE10959	chr19:52598518-52598537	GGAGAACGATGTCTCACGAC
sgRNA_00570	CRE10959	chr19:52598714-52598733	GCGGGAACACTACCTGAATG
sgRNA_00571	CRE10959	chr19:52598712-52598731	AAGCGGGAACACTACCTGAA
sgRNA_00572	CRE10959	chr19:52598713-52598732	AGCGGGAACACTACCTGAAT
sgRNA_00573	CRE10959	chr19:52598965-52598984	GAAACACACTCATAGCGACG
sgRNA_00574	CRE10962	chr19:52693048-52693067	CGGGTACAATCTTGGTCGCT
sgRNA_00575	CRE10962	chr19:52693045-52693064	GACCAAGATTGTACCCGCCC
sgRNA_00576	CRE10962	chr19:52693025-52693044	GTCGTTGTTAGCAGCGACCA
sgRNA_00577	CRE10962	chr19:52693295-52693314	CCCACGTTTCAGCACAGCGC
sgRNA_00578	CRE10962	chr19:52693422-52693441	GTTCAGGTCCGGAGGCTACG
sgRNA_00579	CRE10966	chr19:52873186-52873205	AGACCCGGAAGCAGATTACG
sgRNA_00580	CRE10966	chr19:52873345-52873364	AGAACGTCTGAGTTTAGTCG
sgRNA_00581	CRE10966	chr19:52873390-52873409	TGAGTGTTAAAATCGCTCGG
sgRNA_00582	CRE10966	chr19:52873346-52873365	TAGAACGTCTGAGTTTAGTC
sgRNA_00583	CRE10966	chr19:52873512-52873531	GTGAGAACTTTACGCAGCGC
sgRNA_00584	CRE10967	chr19:52900741-52900760	GTTTTTTTCTCTTTCTTTCT
sgRNA_00585	CRE10967	chr19:52901036-52901055	AAATTGCGCGCGCATCCTAG
sgRNA_00586	CRE10967	chr19:52901046-52901065	CGCGCAATTTCGTGCAAACC
sgRNA_00587	CRE10967	chr19:52901027-52901046	GCGCATCCTAGAGGCCGGAC
sgRNA_00588	CRE10967	chr19:52901209-52901228	TTCTATACCCGGGAGCTGAG
sgRNA_00589	CRE10972	chr19:53141213-53141232	CCAGTGGCCTACGAAGGCGA
sgRNA_00590	CRE10972	chr19:53141582-53141601	CACTCCACATAATCCGCTTC
sgRNA_00591	CRE10972	chr19:53141604-53141623	CGCGCACATGCGCGCAAACC
sgRNA_00592	CRE10972	chr19:53141589-53141608	AAACCCGGAAGCGGATTATG
sgRNA_00593	CRE10972	chr19:53141753-53141772	AACGATGCTGAGAGACTCAC
sgRNA_00594	CRE10973	chr19:53193503-53193522	CAGGGGATGGGACCAACCTC
sgRNA_00595	CRE10973	chr19:53193735-53193754	CGCGCAGATTCTCGCAAATC
sgRNA_00596	CRE10973	chr19:53193681-53193700	AACAGCGAAACTCACCGCCG
sgRNA_00597	CRE10973	chr19:53193911-53193930	GCGCCTCTGTTTTTCGGGTT
sgRNA_00598	CRE10973	chr19:53193950-53193969	GAATCATGCCTCATACTTCC
sgRNA_00599	CRE10991	chr19:53898098-53898117	TGAAATCGTACGTTCCATCC
sgRNA_00600	CRE10991	chr19:53898325-53898344	GGGCGGGCTTGGGCGAGGTA
sgRNA_00601	CRE10991	chr19:53898335-53898354	AAGCCCGCCCACCTCCTCGC
sgRNA_00602	CRE10991	chr19:53898324-53898343	GGCGGGCTTGGGCGAGGTAG
sgRNA_00603	CRE10991	chr19:53898643-53898662	GCCCTATAGCAGAAACACCC
sgRNA_00604	CRE11013	chr19:54975084-54975103	TTACGTGTGCCTCGACCTTT
sgRNA_00605	CRE11013	chr19:54975069-54975088	CGTAATCATCCCGAAAGGGG
sgRNA_00606	CRE11013	chr19:54975074-54975093	GCACACGTAATCATCCCGAA
sgRNA_00607	CRE11013	chr19:54975368-54975387	GGTGATTTACATGCGTGCCC
sgRNA_00608	CRE11013	chr19:54975677-54975696	CTGGGAAACTTACGAGAACC
sgRNA_00609	CRE11054	chr19:56632135-56632154	AGTTCCAACTCCGCCGGTCG
sgRNA_00610	CRE11054	chr19:56632581-56632600	CTCTCCTGCCTCGCGGATGG
sgRNA_00611	CRE11054	chr19:56632862-56632881	TCTATGGCGCCCCGCGCCGA
sgRNA_00612	CRE11054	chr19:56632863-56632882	CTATGGCGCCCCGCGCCGAG
sgRNA_00613	CRE11054	chr19:56632861-56632880	CTCTATGGCGCCCCGCGCCG
sgRNA_00614	CRE11071	chr19:57751802-57751821	ACACCGAGGCCTGCCGGCTC
sgRNA_00615	CRE11071	chr19:57751994-57752013	AGCGACGGTTCCGTCCACGC
sgRNA_00616	CRE11071	chr19:57752002-57752021	TTCCGTCCACGCCGGCTCTA
sgRNA_00617	CRE11071	chr19:57752001-57752020	GTTCCGTCCACGCCGGCTCT
sgRNA_00618	CRE11071	chr19:57752314-57752333	GCTGCTTTTCTGCTAGTTCG
sgRNA_00619	CRE11075	chr19:57874547-57874566	GAGTGCCGGACTCCACGGAC
sgRNA_00620	CRE11075	chr19:57874764-57874783	CGTGCTCGCGCATCGTAGGA
sgRNA_00621	CRE11075	chr19:57874764-57874783	TCCTACGATGCGCGAGCACG
sgRNA_00622	CRE11075	chr19:57874763-57874782	TCGTGCTCGCGCATCGTAGG
sgRNA_00623	CRE11075	chr19:57875056-57875075	CCACCTCGGGTTCTTCGGCG
sgRNA_00624	CRE11079	chr19:57988957-57988976	CAGGAAATAGGCGTTTCCGT
sgRNA_00625	CRE11079	chr19:57988939-57988958	GTTGGTCCTCACCAACGTCA
sgRNA_00626	CRE11079	chr19:57989093-57989112	ACACCATTTCCACGCGCCCC
sgRNA_00627	CRE11079	chr19:57989105-57989124	AATGGTGTCCCTCGTCTCCA
sgRNA_00628	CRE11079	chr19:57989229-57989248	GAGCATTCTCTGCGTAAGGA
sgRNA_00629	CRE11102	chr19:58513953-58513972	AGAAAACGAAGAACGCCCGG
sgRNA_00630	CRE11102	chr19:58514035-58514054	TGCGCCTGCCCTTTCCGCGC
sgRNA_00631	CRE11102	chr19:58514028-58514047	AAAGCCGGCGCGGAAAGGGC
sgRNA_00632	CRE11102	chr19:58514102-58514121	CCGCCGTAGCTGCGGGGCTT
sgRNA_00633	CRE11102	chr19:58514317-58514336	TCTGGCACCTGCGTCGAAGC
sgRNA_00634	CRE11105	chr19:58661907-58661926	GGGGACGCTCCGTGGCGATT
sgRNA_00635	CRE11105	chr19:58662102-58662121	GATGCGTCGGCACTTACGGT
sgRNA_00636	CRE11105	chr19:58662148-58662167	GCCGCGCAAGCGCAATCGCC
sgRNA_00637	CRE11105	chr19:58662144-58662163	TCCGGGCGATTGCGCTTGCG
sgRNA_00638	CRE11105	chr19:58662317-58662336	AGCATCGGGTTAAAAATCAG
sgRNA_00639	CRE11106	chr19:58666134-58666153	CTGACACCGCAGTCCGCGAG
sgRNA_00640	CRE11106	chr19:58666284-58666303	CGCCGTGGGTGCACGGGCTA
sgRNA_00641	CRE11106	chr19:58666335-58666354	TGGAACCCGCAGCCGTGTCT
sgRNA_00642	CRE11106	chr19:58666316-58666335	AGCCAACAGGCCCGGAGTCG
sgRNA_00643	CRE11106	chr19:58666467-58666486	TGGGCGCTCATGCGCAATGG
sgRNA_00644	CRE11124	chr19:59025354-59025373	ACAGTCGGCCACGCCCGCTG
sgRNA_00645	CRE11124	chr19:59025456-59025475	CTTCTCGCACCGCGCGCTGC
sgRNA_00646	CRE11124	chr19:59025466-59025485	GTGCGAGAAGACCTTGCCGC
sgRNA_00647	CRE11124	chr19:59025471-59025490	AGAAGACCTTGCCGCAGGCG
sgRNA_00648	CRE11124	chr19:59025879-59025898	CCAGGACCTCCCTTCACGTT
sgRNA_00649	CRE11152	chr2:3383347-3383366	GGTCCGCTCCCCTCAACTAC
sgRNA_00650	CRE11152	chr2:3383489-3383508	GAGCAGAACTAGGCGCGCCG
sgRNA_00651	CRE11152	chr2:3383515-3383534	TCTGTACGCCTGCGCGTGCC
sgRNA_00652	CRE11152	chr2:3383489-3383508	CGGCGCGCCTAGTTCTGCTC
sgRNA_00653	CRE11152	chr2:3383683-3383702	GGACCGTGTAGCGCCACCTC
sgRNA_00654	CRE11191	chr2:9614575-9614594	GTCACTTTGGTGACGCGCGA
sgRNA_00655	CRE11191	chr2:9614744-9614763	TCCCCGAAGAGCAACAAGCG
sgRNA_00656	CRE11191	chr2:9614775-9614794	GCGTCGGGGCGGCCGTACCT
sgRNA_00657	CRE11191	chr2:9614776-9614795	AGCGTCGGGGCGGCCGTACC
sgRNA_00658	CRE11191	chr2:9615059-9615078	GAAGACCGCGCATCTCGACC
sgRNA_00659	CRE11193	chr2:9695892-9695911	ACTTCTGGGGGCGTCGAGCC
sgRNA_00660	CRE11193	chr2:9695871-9695890	ACTGGGAAGATTCTACCGCC
sgRNA_00661	CRE11193	chr2:9696075-9696094	CCCGCCCGTCACGTCTAGCT
sgRNA_00662	CRE11193	chr2:9696082-9696101	GAGCCCCAGCTAGACGTGAC
sgRNA_00663	CRE11193	chr2:9696343-9696362	CGCGACTGGCCCGATGCCGC
sgRNA_00664	CRE11207	chr2:10588016-10588035	GCCCCCGTCTTCACAGCTCG
sgRNA_00665	CRE11207	chr2:10588530-10588549	GTCCCGGCCGGAACCGATCG
sgRNA_00666	CRE11207	chr2:10588483-10588502	ATAGCACCGGCGGGTCGCCA
sgRNA_00667	CRE11207	chr2:10588520-10588539	AAACCAGCCACGATCGGTTC
sgRNA_00668	CRE11207	chr2:10588889-10588908	CTTTTCCGCTCTCGGGCACG
sgRNA_00669	CRE11236	chr2:17934940-17934959	CGTGGTACGACCGGCCGCTA
sgRNA_00670	CRE11236	chr2:17935260-17935279	GAAAGATAATTGAGCGCCCC
sgRNA_00671	CRE11236	chr2:17935207-17935226	GGCTCCGCAGTGACCGGACT
sgRNA_00672	CRE11236	chr2:17935210-17935229	TCCGCAGTGACCGGACTCGG
sgRNA_00673	CRE11236	chr2:17935441-17935460	GCTCCCCGGGCTCAACCGCC
sgRNA_00674	CRE11242	chr2:20189685-20189704	AAGGCAGCGGGAATCGCCGC
sgRNA_00675	CRE11242	chr2:20189890-20189909	CGCTGTTGCCCGGTCGCATC
sgRNA_00676	CRE11242	chr2:20189892-20189911	CTGTTGCCCGGTCGCATCCG
sgRNA_00677	CRE11242	chr2:20189902-20189921	CGCGGCGCCCCGGATGCGAC
sgRNA_00678	CRE11242	chr2:20190098-20190117	GCAGAGGGCGAGCGCACGGC
sgRNA_00679	CRE11256	chr2:24149804-24149823	GAAGGGAAGTCGGCGTGAGC
sgRNA_00680	CRE11256	chr2:24149989-24150008	GCGGCCGGAAGCGGTCTCGT
sgRNA_00681	CRE11256	chr2:24150013-24150032	ACGGCGGGGCGCTGCGAAGC
sgRNA_00682	CRE11256	chr2:24149999-24150018	TTCCGGCCGCAGCCACGGCG
sgRNA_00683	CRE11256	chr2:24150314-24150333	CTTCCACCCCGCGCCTTCGC
sgRNA_00684	CRE11264	chr2:24583316-24583335	CTACGCAACAGGTTCGCGGG
sgRNA_00685	CRE11264	chr2:24583493-24583512	AGCCCGAAACTGCCCGGGCG
sgRNA_00686	CRE11264	chr2:24583528-24583547	GTTCAATGCCCCGGAACTCC
sgRNA_00687	CRE11264	chr2:24583484-24583503	AGTTTCGGGCTCCGGAGGGT
sgRNA_00688	CRE11264	chr2:24583822-24583841	ATCTGGGGGAACGAATTCTC
sgRNA_00689	CRE11274	chr2:25508725-25508744	AGGGGTACACTCCACTTTTC
sgRNA_00690	CRE11274	chr2:25508954-25508973	TTGCCTCCAGCAGCTTTGCG
sgRNA_00691	CRE11274	chr2:25508930-25508949	TCAGAGCCTGCCCCAATCTG
sgRNA_00692	CRE11274	chr2:25508945-25508964	TCTGAGCCCCGCAAAGCTGC
sgRNA_00693	CRE11274	chr2:25509188-25509207	CTCTGGGAGAATGGCGCATC
sgRNA_00694	CRE11288	chr2:26256617-26256636	GGCTCTGTAAGGGTGTCCCG
sgRNA_00695	CRE11288	chr2:26256842-26256861	GAGCATTCCACTCGCCACTT
sgRNA_00696	CRE11288	chr2:26256859-26256878	GGCATGGGGGCGCGCCGAAG
sgRNA_00697	CRE11288	chr2:26256852-26256871	GGGCGCGCCGAAGTGGCGAG
sgRNA_00698	CRE11288	chr2:26257224-26257243	CCGGTTCCGGGGAGTCGGTC
sgRNA_00699	CRE11289	chr2:26267204-26267223	TTCCCATGCTTTAATATCAC
sgRNA_00700	CRE11289	chr2:26267388-26267407	CATGTGGCCTTTTGGCCTTC
sgRNA_00701	CRE11289	chr2:26267396-26267415	TAATTAGCCATGTGGCCTTT
sgRNA_00702	CRE11289	chr2:26267378-26267397	GTAACTTCCAGAAGGCCAAA
sgRNA_00703	CRE11289	chr2:26267604-26267623	AGGGTTTCGCCCTGTTGACC
sgRNA_00704	CRE11298	chr2:26987045-26987064	CGAGTCGTCCTGGAGCGCTT
sgRNA_00705	CRE11298	chr2:26987181-26987200	TTCGCTCCAGTTAGCGGCGC
sgRNA_00706	CRE11298	chr2:26987180-26987199	TCGCTCCAGTTAGCGGCGCC
sgRNA_00707	CRE11298	chr2:26987199-26987218	AACCCCAGCGTCCGCCGACA
sgRNA_00708	CRE11298	chr2:26987408-26987427	CATAACGCGCGCGAACTGAC
sgRNA_00709	CRE11314	chr2:27632935-27632954	TCGAATTATATCACAGATCG
sgRNA_00710	CRE11314	chr2:27632594-27632613	CGTGGTCGCGCTAGTCTCGC
sgRNA_00711	CRE11314	chr2:27632595-27632614	GCGTGGTCGCGCTAGTCTCG
sgRNA_00712	CRE11320	chr2:27979886-27979905	CGGGGAACAGCTGATGAAAT
sgRNA_00713	CRE11320	chr2:27979853-27979872	ACCACTTCCCAGGGTGGGAA
sgRNA_00714	CRE11320	chr2:27979852-27979871	TCCCACCCTGGGAAGTGGTG
sgRNA_00715	CRE11320	chr2:27980064-27980083	AAAGTATCAACCATTGGCTC
sgRNA_00716	CRE11320	chr2:27980222-27980241	AGCACACAGAAAGTATGGTC
sgRNA_00717	CRE11346	chr2:30454306-30454325	CGTTATTCCAGGAGTGGGCG
sgRNA_00718	CRE11346	chr2:30454307-30454326	GTTATTCCAGGAGTGGGCGA
sgRNA_00719	CRE11346	chr2:30454295-30454314	GATTTTGGTGACGTTATTCC
sgRNA_00720	CRE11346	chr2:30454439-30454458	CACGGCTAGCGACGTCGGCA
sgRNA_00721	CRE11346	chr2:30454632-30454651	TGAGTACCCTGCGCCTGCGG
sgRNA_00722	CRE11359	chr2:32489809-32489828	GGCAATTGGATTGCTCAGCC
sgRNA_00723	CRE11359	chr2:32489902-32489921	ATCTGGTCTACAAGAACTCG
sgRNA_00724	CRE11359	chr2:32490017-32490036	CAAGTACTACCAGTTCAGAA
sgRNA_00725	CRE11359	chr2:32489991-32490010	AAAGCACAGTAAGAGTGGTT
sgRNA_00726	CRE11359	chr2:32490029-32490048	CCCATCTTCCCTTTCTGAAC
sgRNA_00727	CRE1138	chr1:145209050-145209069	GCCCCGCCCCACTGTCGCCG
sgRNA_00728	CRE1138	chr1:145209089-145209108	CTGAGGCGGAAGGACACACG
sgRNA_00729	CRE1138	chr1:145209046-145209065	GCCGCGGCGACAGTGGGGCG
sgRNA_00730	CRE1138	chr1:145209359-145209378	GCGCAGGGCGGGTATCTTCT
sgRNA_00731	CRE1138	chr1:145209563-145209582	TCGCTGGGTTCCCGAGAGTT
sgRNA_00732	CRE11383	chr2:37851303-37851322	ATAATGTCCTGGACTATGGT
sgRNA_00733	CRE11383	chr2:37851464-37851483	TATAATAGGCTTCAGACACT
sgRNA_00734	CRE11383	chr2:37851419-37851438	ATAAAGCTTTTGCATTAGTT
sgRNA_00735	CRE11383	chr2:37851418-37851437	ACTAATGCAAAAGCTTTATA
sgRNA_00736	CRE11383	chr2:37851621-37851640	CCAGACTTTTGGCCTATAGC
sgRNA_00737	CRE11386	chr2:37899182-37899201	GGGCGCACGAGTTTTAGTGC
sgRNA_00738	CRE11386	chr2:37899400-37899419	TTATTCCACTCTCCGGGTTT
sgRNA_00739	CRE11386	chr2:37899407-37899426	AGGGCGCTTATTCCACTCTC
sgRNA_00740	CRE11386	chr2:37899427-37899446	CCGGGAGCTCCGGCATCTTC
sgRNA_00741	CRE11386	chr2:37899544-37899563	CTAAAGCTGGGGCAAGCCGG
sgRNA_00742	CRE11401	chr2:39005321-39005340	ACGATCGGCGCAAAGCATGC
sgRNA_00743	CRE11401	chr2:39005281-39005300	CTCTGTTTTGTAGTCCTACT
sgRNA_00744	CRE11401	chr2:39005328-39005347	GCGCAAAGCATGCTGGTCTC
sgRNA_00745	CRE11401	chr2:39005474-39005493	GTACAGTGTTAGGTATCGTG
sgRNA_00746	CRE11401	chr2:39005692-39005711	GGGTGAACTCCTTTGATCGA
sgRNA_00747	CRE11402	chr2:39033474-39033493	AAGCAGGCTTGAGTACTTTT
sgRNA_00748	CRE11402	chr2:39033661-39033680	TTAATGTTTACAGGTCGTCC
sgRNA_00749	CRE11402	chr2:39033660-39033679	TAATGTTTACAGGTCGTCCT
sgRNA_00750	CRE11402	chr2:39033659-39033678	AATGTTTACAGGTCGTCCTG
sgRNA_00751	CRE11402	chr2:39033782-39033801	CATTCTGACAGCTCCAGTAC
sgRNA_00752	CRE11409	chr2:39663990-39664009	TCGGGATCCCACGGCCTCGG
sgRNA_00753	CRE11409	chr2:39664229-39664248	CGGGTGATTGTGACCGCCGG
sgRNA_00754	CRE11409	chr2:39664495-39664514	ATCGCGGCTGCGCAGTCGGG
sgRNA_00755	CRE11409	chr2:39664497-39664516	CGACTGCGCAGCCGCGATCC
sgRNA_00756	CRE11409	chr2:39664498-39664517	GGGATCGCGGCTGCGCAGTC
sgRNA_00757	CRE11424	chr2:42794948-42794967	GGTGGTGATTGTGAACTGTA
sgRNA_00758	CRE11424	chr2:42795115-42795134	GGGTAAACGATGACGCAGTT
sgRNA_00759	CRE11424	chr2:42795116-42795135	GGTAAACGATGACGCAGTTA
sgRNA_00760	CRE11424	chr2:42795119-42795138	AAACGATGACGCAGTTAGGG
sgRNA_00761	CRE11424	chr2:42795249-42795268	TTCCTCGCGGTGAGATTCAA
sgRNA_00762	CRE11425	chr2:42795915-42795934	TAGGCAGGCTCGGCCCGACC
sgRNA_00763	CRE11425	chr2:42795925-42795944	CGGCCCGACCCGGCCCGTGT
sgRNA_00764	CRE11425	chr2:42795900-42795919	GTACCGGGTCGGAGGTAGGC
sgRNA_00765	CRE11425	chr2:42796091-42796110	CCCCCCACGCGGGCTCGCGA
sgRNA_00766	CRE11425	chr2:42796308-42796327	TTCCCCACTCAGTGGGAGCC
sgRNA_00767	CRE11453	chr2:44588708-44588727	CTCAATCTAGCACGAGCAAC
sgRNA_00768	CRE11453	chr2:44588992-44589011	TACCGGAAATGCGGAATTCG
sgRNA_00769	CRE11453	chr2:44588990-44589009	AGTACCGGAAATGCGGAATT
sgRNA_00770	CRE11453	chr2:44589143-44589162	TGAGATGGAGTCGCGAGTCG
sgRNA_00771	CRE11453	chr2:44589151-44589170	AGTCGCGAGTCGCGGACGCT
sgRNA_00772	CRE11457	chr2:45837975-45837994	GCGAATGGCGTGAATCCGGG
sgRNA_00773	CRE11457	chr2:45838386-45838405	CGGTGGCACTCACGGAATCT
sgRNA_00774	CRE11457	chr2:45838364-45838383	GGTCTTCTGACGTGCCGGGC
sgRNA_00775	CRE11457	chr2:45838411-45838430	AACTTCCGGCGGGAACCGGA
sgRNA_00776	CRE11457	chr2:45838415-45838434	GAAAAACTTCCGGCGGGAAC
sgRNA_00777	CRE11462	chr2:46414823-46414842	CATTGTTTTTTCACCTTTGG
sgRNA_00778	CRE11462	chr2:46414464-46414483	GTGCTGAAAAGGGCCCTTTC
sgRNA_00779	CRE11462	chr2:46414512-46414531	GGCTGGTGAAGTTCTCACAT
sgRNA_00780	CRE11462	chr2:46414533-46414552	GGCTGATTTAAATCCAGCAA
sgRNA_00781	CRE11462	chr2:46414411-46414430	GTCAAATAATACATTCCACC
sgRNA_00782	CRE11462	chr2:46414450-46414469	CCTTTCTGGGACAGACTGAC
sgRNA_00783	CRE11476	chr2:47403787-47403806	TCACAGTTATTTGGTCGATG
sgRNA_00784	CRE11476	chr2:47403948-47403967	GGCAGGCTCAACGACCAACG
sgRNA_00785	CRE11476	chr2:47403900-47403919	GGCGCTACTTTGCGGCGCGG
sgRNA_00786	CRE11476	chr2:47403897-47403916	AGGGGCGCTACTTTGCGGCG
sgRNA_00787	CRE11476	chr2:47404230-47404249	AGTTCAGGGTACGCGTTTAT
sgRNA_00788	CRE11477	chr2:47426263-47426282	ACAGTGACTCATTGCGTGTA
sgRNA_00789	CRE11477	chr2:47426470-47426489	CAAACCCTCTTAGCGATCCA
sgRNA_00790	CRE11477	chr2:47426462-47426481	GCCATCCATGGATCGCTAAG
sgRNA_00791	CRE11477	chr2:47426463-47426482	CCATCCATGGATCGCTAAGA
sgRNA_00792	CRE11477	chr2:47426632-47426651	TTGGGACAAGCTGATCGAGC
sgRNA_00793	CRE11482	chr2:47596793-47596812	CCCTATTATGCCCGTTTCGG
sgRNA_00794	CRE11482	chr2:47596925-47596944	GCGAGCAAAGCTGCGAAGTG
sgRNA_00795	CRE11482	chr2:47596927-47596946	CTTCGCAGCTTTGCTCGCCT
sgRNA_00796	CRE11482	chr2:47596931-47596950	GCAGCTTTGCTCGCCTTGGT
sgRNA_00797	CRE11482	chr2:47597102-47597121	GGTGGCGGAGTCTTTACGAC
sgRNA_00798	CRE11488	chr2:48009822-48009841	GCCGTTAGAGCATTTTCGCA
sgRNA_00799	CRE11488	chr2:48010171-48010190	CCCGGGCGCGCGGCGACGTG
sgRNA_00800	CRE11488	chr2:48010172-48010191	CCCCGGGCGCGCGGCGACGT
sgRNA_00801	CRE11488	chr2:48010333-48010352	CTCCGTCCGACAGAACGGTT
sgRNA_00802	CRE11488	chr2:48010332-48010351	GCTCCGTCCGACAGAACGGT
sgRNA_00803	CRE11509	chr2:54342664-54342683	AAGCGGCAAATGAGACTGCG
sgRNA_00804	CRE11509	chr2:54342777-54342796	TCGGGGCGCAGCGACTGCGG
sgRNA_00805	CRE11509	chr2:54342766-54342785	CGACTGCGGCGGCTGCGAGA
sgRNA_00806	CRE11509	chr2:54343074-54343093	ACGGGCGGAAGTACGGGAAT
sgRNA_00807	CRE11509	chr2:54343045-54343064	GCGAAACGCGCATGCGCCCG
sgRNA_00808	CRE11531	chr2:57987001-57987020	AAAGGTTTTTTATCCCATCA
sgRNA_00809	CRE11531	chr2:57987204-57987223	CATGCCACGTTTCCGCCAAA
sgRNA_00810	CRE11531	chr2:57987197-57987216	AGGACCATTTGGCGGAAACG
sgRNA_00811	CRE11531	chr2:57987202-57987221	CATTTGGCGGAAACGTGGCA
sgRNA_00812	CRE11531	chr2:57987307-57987326	CCTCCAGCCCATACAAGGCG
sgRNA_00813	CRE11535	chr2:58467959-58467978	GATGAGTTCACTCGGGAATC
sgRNA_00814	CRE11535	chr2:58468298-58468317	CCTCTTGCAGCGTAGCTGCG
sgRNA_00815	CRE11535	chr2:58468295-58468314	CCGCGCAGCTACGCTGCAAG
sgRNA_00816	CRE11535	chr2:58468376-58468395	ACACGGTTTTCGACCGGTTC
sgRNA_00817	CRE11535	chr2:58468377-58468396	CACGGTTTTCGACCGGTTCT
sgRNA_00818	CRE11550	chr2:61108505-61108524	ATACGCCCCCGGCGCTGCTG
sgRNA_00819	CRE11550	chr2:61108738-61108757	CCTGGCTCCCGTACGGTGGA
sgRNA_00820	CRE11550	chr2:61108734-61108753	TGCCCCTGGCTCCCGTACGG
sgRNA_00821	CRE11550	chr2:61108741-61108760	CCGTCCACCGTACGGGAGCC
sgRNA_00822	CRE11550	chr2:61108807-61108826	GTGAGCCGCAAACCCAGCGG
sgRNA_00823	CRE11563	chr2:61991170-61991189	AGGATAGAAACGCCGCGCTC
sgRNA_00824	CRE11563	chr2:61991453-61991472	GCCCGCGGCCGCGCAACGAT
sgRNA_00825	CRE11563	chr2:61991464-61991483	CCGTCCCGCCCATCGTTGCG
sgRNA_00826	CRE11563	chr2:61991456-61991475	CGCGGCCGCGCAACGATGGG
sgRNA_00827	CRE11563	chr2:61991661-61991680	CTACGATACCAATCGCGTGG
sgRNA_00828	CRE11583	chr2:64068071-64068090	CGCCTGTCGGTCCGTGCGGC
sgRNA_00829	CRE11583	chr2:64068072-64068091	GCCTGTCGGTCCGTGCGGCA
sgRNA_00830	CRE11583	chr2:64068076-64068095	TCCCTGCCGCACGGACCGAC
sgRNA_00831	CRE11583	chr2:64068225-64068244	CACCTTGAGCCCCTCCCTAA
sgRNA_00832	CRE11583	chr2:64068427-64068446	AGTGTGTTTCCCGCTCTCGC
sgRNA_00833	CRE11587	chr2:64370909-64370928	CGCGCGCTCCGGCTGCGAGA
sgRNA_00834	CRE11587	chr2:64371206-64371225	CACACTTACCGGACAATTGC
sgRNA_00835	CRE11587	chr2:64371627-64371646	GGCGACACCGCCTTCCGCTG
sgRNA_00836	CRE11587	chr2:64371572-64371591	AGGGGAGGGGTCTAGCCGGG
sgRNA_00837	CRE11587	chr2:64371571-64371590	GAGGGGAGGGGTCTAGCCGG
sgRNA_00838	CRE11594	chr2:64681342-64681361	GGCCGTGCCGCGTCGGCCCT
sgRNA_00839	CRE11594	chr2:64681447-64681466	GAGGGCGAAGGTGCTTGCCG
sgRNA_00840	CRE11594	chr2:64681420-64681439	GCCCGGGTCCGGGGCCGTTC
sgRNA_00841	CRE11594	chr2:64681421-64681440	CCCGGGTCCGGGGCCGTTCT
sgRNA_00842	CRE11594	chr2:64681845-64681864	CGGTACCTGTTAGCAGCCGC
sgRNA_00843	CRE1161	chr1:146696965-146696984	TCTCGCTGTTTGTCCGTTGT
sgRNA_00844	CRE1161	chr1:146697181-146697200	AGCGAGCACAGACGGGGCTA
sgRNA_00845	CRE1161	chr1:146697180-146697199	GCGAGCACAGACGGGGCTAG
sgRNA_00846	CRE1161	chr1:146697182-146697201	AAGCGAGCACAGACGGGGCT
sgRNA_00847	CRE1161	chr1:146697333-146697352	CTGTTCAAACAGATTGTAGC
sgRNA_00848	CRE11616	chr2:65356929-65356948	CAGAAGTCGGGGCATCGGCT
sgRNA_00849	CRE11616	chr2:65357116-65357135	GCCACGGGTAATCGAAAGAA
sgRNA_00850	CRE11616	chr2:65357342-65357361	GAGCGCGGCTACGCGAGCTG
sgRNA_00851	CRE11616	chr2:65357362-65357381	AGGACAGACAGTGCGACGCA
sgRNA_00852	CRE11616	chr2:65357400-65357419	CCGCCAAGCGCCGCGCCTCT
sgRNA_00853	CRE11619	chr2:65454587-65454606	CACCGGTTCTGCTGCGGCAG
sgRNA_00854	CRE11619	chr2:65454888-65454907	GCTAAATGACGGGCGGAGCC
sgRNA_00855	CRE11619	chr2:65454891-65454910	AAATGACGGGCGGAGCCCGG
sgRNA_00856	CRE11619	chr2:65454859-65454878	CCGTCCCACCCTTTTCGTGC
sgRNA_00857	CRE11619	chr2:65455114-65455133	TTGGCGGCCACAGACGCCGG
sgRNA_00858	CRE11620	chr2:65617548-65617567	CCAGCCCAGAGGTTTGGCGT
sgRNA_00859	CRE11620	chr2:65617696-65617715	ACACAGCCCTTGACAGAATC
sgRNA_00860	CRE11620	chr2:65617702-65617721	GTCAAGGGCTGTGTGGCTAT
sgRNA_00861	CRE11620	chr2:65617750-65617769	TGTTGCATCCCCATTTACAG
sgRNA_00862	CRE11620	chr2:65617916-65617935	TCATCAGAAAATCTACTCCC
sgRNA_00863	CRE11635	chr2:68592219-68592238	TGGGTTGAATATTTACCTAA
sgRNA_00864	CRE11635	chr2:68592381-68592400	TGGGCCGCCTTTTCTACAGC
sgRNA_00865	CRE11635	chr2:68592371-68592390	AAAGCGACCTGCTGTAGAAA
sgRNA_00866	CRE11635	chr2:68592374-68592393	GCGACCTGCTGTAGAAAAGG
sgRNA_00867	CRE11635	chr2:68592625-68592644	TTCAACCCAACTGGTTGAAC
sgRNA_00868	CRE11646	chr2:69135467-69135486	CTGTACCAGTATGGTGGCGT
sgRNA_00869	CRE11646	chr2:69135747-69135766	GCTAACGGAAGTAAAATAGC
sgRNA_00870	CRE11646	chr2:69135711-69135730	AGCCTCAGTGTTGCCTTATA
sgRNA_00871	CRE11646	chr2:69135775-69135794	TGACCCTGGGCCACGCCTCT
sgRNA_00872	CRE11646	chr2:69135979-69135998	GACAATAATACCCTGCCCCT
sgRNA_00873	CRE11647	chr2:69240322-69240341	TCCATTGCAAAAGCTCGGCG
sgRNA_00874	CRE11647	chr2:69240306-69240325	TGGAAGGAGTTCCGTCCCGA
sgRNA_00875	CRE11647	chr2:69240328-69240347	GCAAAAGCTCGGCGCGGCCT
sgRNA_00876	CRE11647	chr2:69240486-69240505	ACTCCCCGGAAGCAATTGTC
sgRNA_00877	CRE11647	chr2:69240657-69240676	CCACTGGAAGCCGATGCCGA
sgRNA_00878	CRE11652	chr2:69870843-69870862	CCGGCGCTCCCGGGATCAGC
sgRNA_00879	CRE11652	chr2:69871088-69871107	TTGATATCACCCGAGCCGCA
sgRNA_00880	CRE11652	chr2:69871087-69871106	GTTGATATCACCCGAGCCGC
sgRNA_00881	CRE11652	chr2:69871120-69871139	AAAGGTAGCTCGGCACAGTC
sgRNA_00882	CRE11652	chr2:69871336-69871355	GAGCCATCTTATTTGCGGCC
sgRNA_00883	CRE1166	chr1:147142392-147142411	GGGAGTTTTAACCCGGGTCG
sgRNA_00884	CRE1166	chr1:147142728-147142747	CCACAAGGCTGCGCGTACCG
sgRNA_00885	CRE1166	chr1:147142730-147142749	CGCGGTACGCGCAGCCTTGT
sgRNA_00886	CRE1166	chr1:147142731-147142750	CCGCGGTACGCGCAGCCTTG
sgRNA_00887	CRE1166	chr1:147142911-147142930	CGCGAGCGCAGGAGTAGAAC
sgRNA_00888	CRE11662	chr2:70313409-70313428	AAACATGGCGGCCGCCCCAA
sgRNA_00889	CRE11662	chr2:70313640-70313659	TCAAGGGGGGCGGCCCCGTC
sgRNA_00890	CRE11662	chr2:70313624-70313643	CAAGATGGCGGGCCCTGACG
sgRNA_00891	CRE11662	chr2:70314063-70314082	CCCGGACGCCGGGGACGAAA
sgRNA_00892	CRE11662	chr2:70314067-70314086	GCCCTTTCGTCCCCGGCGTC
sgRNA_00893	CRE11663	chr2:70322330-70322349	AGTTCAGACCCATGATTCTC
sgRNA_00894	CRE11663	chr2:70322500-70322519	GTTACCCAAAATGCCAAGCT
sgRNA_00895	CRE11663	chr2:70322463-70322482	AGCGGAAGTTGACAAAAAAC
sgRNA_00896	CRE11663	chr2:70322501-70322520	AGTTACCCAAAATGCCAAGC
sgRNA_00897	CRE11663	chr2:70322656-70322675	AGACGGGGTCATTCACTCTG
sgRNA_00898	CRE11697	chr2:73460484-73460503	CGCCTTAGCCTACTTCCTAT
sgRNA_00899	CRE11697	chr2:73460502-73460521	CTCCACTTCTCTCGACCAAT
sgRNA_00900	CRE11697	chr2:73460481-73460500	GGAAGTAGGCTAAGGCGCAG
sgRNA_00901	CRE11697	chr2:73460855-73460874	CACGGTGAGCGCGCAAGCGT
sgRNA_00902	CRE11697	chr2:73461245-73461264	CGGTCGTGCTTCTTAGAGCA
sgRNA_00903	CRE11702	chr2:73815482-73815501	TGGGGCACAAGTGCACGTGT
sgRNA_00904	CRE11702	chr2:73815687-73815706	TGTCTGGTTGTCTTCTGGTG
sgRNA_00905	CRE11702	chr2:73815682-73815701	CTTGGTGTCTGGTTGTCTTC
sgRNA_00906	CRE11702	chr2:73815686-73815705	GTGTCTGGTTGTCTTCTGGT
sgRNA_00907	CRE11702	chr2:73815838-73815857	TATTAGCTCATGTTTCCAGC
sgRNA_00908	CRE1172	chr1:147735741-147735760	GTGCAAATCCGTAGTTACCT
sgRNA_00909	CRE1172	chr1:147735922-147735941	AAAACGTGAGCTCTACGCGA
sgRNA_00910	CRE1172	chr1:147735923-147735942	AAACGTGAGCTCTACGCGAA
sgRNA_00911	CRE1172	chr1:147735943-147735962	GGGCTACTCTTAGTTTCTAT
sgRNA_00912	CRE1172	chr1:147736153-147736172	TCACAGAGAACCCAAGAGAC
sgRNA_00913	CRE11728	chr2:74781335-74781354	GGGAGCTGACATGCAAGCGG
sgRNA_00914	CRE11728	chr2:74781693-74781712	GCAGCTCCCGGCTAATCCGG
sgRNA_00915	CRE11728	chr2:74781692-74781711	TGCAGCTCCCGGCTAATCCG
sgRNA_00916	CRE11728	chr2:74781702-74781721	TGGAGACCCCCGGATTAGCC
sgRNA_00917	CRE11728	chr2:74781975-74781994	TCTCTCACCCACTACTAGCC
sgRNA_00918	CRE11736	chr2:75185387-75185406	GGCACCCTCTTCCACGATGC
sgRNA_00919	CRE11736	chr2:75185590-75185609	GTGCACTTGGTTGACGCTAC
sgRNA_00920	CRE11736	chr2:75185616-75185635	CCACGGGTGGCTAGGCGCGT
sgRNA_00921	CRE11736	chr2:75185963-75185982	GATCCCGACGTGACGCTAGC
sgRNA_00922	CRE11736	chr2:75185962-75185981	AGATCCCGACGTGACGCTAG
sgRNA_00923	CRE11737	chr2:75873756-75873775	GTGTAACTTGGCGCATTACG
sgRNA_00924	CRE11737	chr2:75874025-75874044	CCACTTACTGCAGGCGATAG
sgRNA_00925	CRE11737	chr2:75873980-75873999	GCCGGAGTTTCCAAGCCGCC
sgRNA_00926	CRE11737	chr2:75874053-75874072	TTGCGAGCTGGGGCGCGTTA
sgRNA_00927	CRE11737	chr2:75874054-75874073	TGCGAGCTGGGGCGCGTTAG
sgRNA_00928	CRE11749	chr2:85132469-85132488	TCACCCCGCAGAAAGGATAT
sgRNA_00929	CRE11749	chr2:85132734-85132753	GGCGGGGCGCGGCGTATATA
sgRNA_00930	CRE11749	chr2:85132741-85132760	CGCGGCGTATATAAGGCTAG
sgRNA_00931	CRE11749	chr2:85132739-85132758	GGCGCGGCGTATATAAGGCT
sgRNA_00932	CRE11749	chr2:85132994-85133013	GCGCCCAGATCCTCGGCCTT
sgRNA_00933	CRE11759	chr2:85645406-85645425	AGATGTACCCGCCACGCCTG
sgRNA_00934	CRE11759	chr2:85645705-85645724	GTGTGTCCGGGGGTCTGTTG
sgRNA_00935	CRE11759	chr2:85645696-85645715	GGAGCACCACAACAGACCCC
sgRNA_00936	CRE11759	chr2:85645715-85645734	GTGTGTGTAAGTGTGTCCGG
sgRNA_00937	CRE11759	chr2:85645865-85645884	GCTGGCGCAATCTTTGCGTC
sgRNA_00938	CRE11761	chr2:85765694-85765713	TGCGCCCCTCAGATATCCCG
sgRNA_00939	CRE11761	chr2:85766034-85766053	ATGCAGACGCGAGGAGACGT
sgRNA_00940	CRE11761	chr2:85766035-85766054	AATGCAGACGCGAGGAGACG
sgRNA_00941	CRE11761	chr2:85766033-85766052	TGCAGACGCGAGGAGACGTG
sgRNA_00942	CRE11761	chr2:85766248-85766267	GGGCGCTGCTCTATAAATAC
sgRNA_00943	CRE11765	chr2:85822453-85822472	CGCCATGGGCCAACGCTCGC
sgRNA_00944	CRE11765	chr2:85822766-85822785	TATCCGAGGGACGGGCATAG
sgRNA_00945	CRE11765	chr2:85822742-85822761	TCGTTAAACAGCACGGAAAG
sgRNA_00946	CRE11765	chr2:85822760-85822779	GAGCCACTATGCCCGTCCCT
sgRNA_00947	CRE11765	chr2:85822897-85822916	GCAGTCGTGTTCATCGAAAT
sgRNA_00948	CRE11774	chr2:86263437-86263456	GTTTGTGTAAATTGTCTGGC
sgRNA_00949	CRE11774	chr2:86263795-86263814	TGGATGAGCTGGGTGCGGTC
sgRNA_00950	CRE11774	chr2:86263780-86263799	CGGTCTGGACTCCCTTTGTC
sgRNA_00951	CRE11774	chr2:86263822-86263841	GTTAGGCAGAGCTAAAAGAT
sgRNA_00952	CRE11774	chr2:86264165-86264184	GGCCTCTAGAGAATAACTAA
sgRNA_00953	CRE11782	chr2:86850396-86850415	CTTGAGATCGCGGCACCGGA
sgRNA_00954	CRE11782	chr2:86850681-86850700	CCAGCCGGCCCGAGCGAACC
sgRNA_00955	CRE11782	chr2:86850942-86850961	CCACAACCGTGTATCAGCGG
sgRNA_00956	CRE11782	chr2:86850945-86850964	CCGCCGCTGATACACGGTTG
sgRNA_00957	CRE11782	chr2:86850941-86850960	CGCTGATACACGGTTGTGGA
sgRNA_00958	CRE11822	chr2:95727170-95727189	GTGCTATCTTTTGACCTAAC
sgRNA_00959	CRE11822	chr2:95727402-95727421	GCTGAGCATGTGCTTCCCGC
sgRNA_00960	CRE11822	chr2:95727403-95727422	CTGAGCATGTGCTTCCCGCA
sgRNA_00961	CRE11822	chr2:95727404-95727423	TGAGCATGTGCTTCCCGCAG
sgRNA_00962	CRE11822	chr2:95727617-95727636	GATGAAAGCGCCCCTTCCTT
sgRNA_00963	CRE11876	chr2:99757628-99757647	GGTTCTTGTATCCCCCGCTG
sgRNA_00964	CRE11876	chr2:99757682-99757701	TTCCCACCCCCAAATCGTCC
sgRNA_00965	CRE11876	chr2:99757793-99757812	CTCACGCTCTGTACCGGAGT
sgRNA_00966	CRE11876	chr2:99757794-99757813	TCACGCTCTGTACCGGAGTG
sgRNA_00967	CRE11876	chr2:99758143-99758162	TGCGCATGCGCGTTCCATCC
sgRNA_00968	CRE11892	chr2:101821996-101822015	AATCTGATGAAGGAAATCTA
sgRNA_00969	CRE11892	chr2:101822193-101822212	TGCATGTCATTAACACTAGA
sgRNA_00970	CRE11892	chr2:101822198-101822217	TGTTAATGACATGCAATCTT
sgRNA_00971	CRE11892	chr2:101822212-101822231	AATCTTTGGGAGCAGCCTCC
sgRNA_00972	CRE11892	chr2:101822325-101822344	TGAGGCGGGCGGATCGCCTG
sgRNA_00973	CRE11894	chr2:101869008-101869027	CAGCACTTACTGGGACCGTC
sgRNA_00974	CRE11894	chr2:101868998-101869017	ATAACGTAGACAGCACTTAC
sgRNA_00975	CRE11894	chr2:101869226-101869245	GAAGAGGATGCGGAGACGCG
sgRNA_00976	CRE11894	chr2:101869248-101869267	GAGGCTGATGGAGCGAAGCC
sgRNA_00977	CRE11894	chr2:101869603-101869622	CAGGATGAGCTTGACCCCGA
sgRNA_00978	CRE11895	chr2:101925182-101925201	CACCTGGCGGAGTGGACGAA
sgRNA_00979	CRE11895	chr2:101925134-101925153	CAGTCTTCCAGGGCGGCGGT
sgRNA_00980	CRE11895	chr2:101925430-101925449	AGGGAAGCTTCCCGTTTCTC
sgRNA_00981	CRE11895	chr2:101925450-101925469	GCGGTCCCACACCTGCTTTC
sgRNA_00982	CRE11895	chr2:101925582-101925601	CCCGAGTGGGAACTCTAGTT
sgRNA_00983	CRE11936	chr2:109150301-109150320	GCAGGCTCCATGCGGAGCTC
sgRNA_00984	CRE11936	chr2:109150631-109150650	GAGGCTGGCGCAAACGCAGC
sgRNA_00985	CRE11936	chr2:109150557-109150576	GGGCCGAGTTCCCTACAACA
sgRNA_00986	CRE11936	chr2:109150579-109150598	GAGCCGCCGCCGCGCTCCGT
sgRNA_00987	CRE11936	chr2:109150754-109150773	CCTCTCCAGTCCGCGCCCTT
sgRNA_00988	CRE11974	chr2:112852694-112852713	GAGAAACAAGAAGAAAAAAA
sgRNA_00989	CRE11974	chr2:112852695-112852714	AGAGAAACAAGAAGAAAAAA
sgRNA_00990	CRE11974	chr2:112852894-112852913	GAAGTGAGAGCGCGCTGCTG
sgRNA_00991	CRE11974	chr2:112852596-112852615	GAATTAGATTCTTAGAGGAT
sgRNA_00992	CRE11974	chr2:112852528-112852547	ACGTATACAATTGAGTGCTT
sgRNA_00993	CRE11974	chr2:112852403-112852422	TTTGCTGTCAGATTGCTCTT
sgRNA_00994	CRE11974	chr2:112852601-112852620	CTTTAGAATTAGATTCTTAG
sgRNA_00995	CRE11974	chr2:112852605-112852624	GAATCTAATTCTAAAGTCAT
sgRNA_00996	CRE12013	chr2:118771428-118771447	GGGCGCCCCTAACGCACCCA
sgRNA_00997	CRE12013	chr2:118771602-118771621	GAAGCCCGCCAAGCGTCCGG
sgRNA_00998	CRE12013	chr2:118771599-118771618	AGCGAAGCCCGCCAAGCGTC
sgRNA_00999	CRE12013	chr2:118771613-118771632	GACAGCTTCCTCCGGACGCT
sgRNA_01000	CRE12013	chr2:118771819-118771838	CGATGATCCAGCACAACGCC
sgRNA_01001	CRE12026	chr2:120436602-120436621	GGGAGCTCGCTCGACGGGTC
sgRNA_01002	CRE12026	chr2:120436774-120436793	CATGTAGGCGTTCCGAGCGG
sgRNA_01003	CRE12026	chr2:120436768-120436787	GGAACGCCTACATGTGCGCG
sgRNA_01004	CRE12026	chr2:120436764-120436783	CGCCTACATGTGCGCGCGGC
sgRNA_01005	CRE12026	chr2:120437003-120437022	ACCAAAGTCCAACGTCCCTA
sgRNA_01006	CRE12028	chr2:120770537-120770556	AAATTGGCCGGCGCGGCGAC
sgRNA_01007	CRE12028	chr2:120770538-120770557	TCGCCGCGCCGGCCAATTTC
sgRNA_01008	CRE12028	chr2:120770667-120770686	AGAGCCGGTGGGCTCGTTGT
sgRNA_01009	CRE12028	chr2:120770666-120770685	TAGAGCCGGTGGGCTCGTTG
sgRNA_01010	CRE12028	chr2:120770803-120770822	CTGTACTGCGGCGCCGCCGC
sgRNA_01011	CRE12035	chr2:122288356-122288375	GCTAGCTACCAGACCGACTA
sgRNA_01012	CRE12035	chr2:122288525-122288544	TTGATGCGGGTGTGTTGTTC
sgRNA_01013	CRE12035	chr2:122288717-122288736	TTTGCGGTGATTAAACGGGA
sgRNA_01014	CRE12035	chr2:122288663-122288682	TAGAGGGTGCACAAGACGCG
sgRNA_01015	CRE12035	chr2:122288662-122288681	GCGTCTTGTGCACCCTCTAC
sgRNA_01016	CRE12038	chr2:122457078-122457097	TGAACGAAGCAGCTCTCTTC
sgRNA_01017	CRE12038	chr2:122457170-122457189	GAGATGAGGTCAGCTCTCAG
sgRNA_01018	CRE12038	chr2:122457500-122457519	ATGGCTTGGCCCCCGCAGGA
sgRNA_01019	CRE12038	chr2:122457219-122457238	GCACAGTGGGCCTCTACTGA
sgRNA_01020	CRE12038	chr2:122457332-122457351	TGGACAAATCTGGGTCATAC
sgRNA_01021	CRE12038	chr2:122457232-122457251	ACCTCCCATGCGGGCACAGT
sgRNA_01022	CRE12038	chr2:122457206-122457225	AATGATCAAACCCTCAGTAG
sgRNA_01023	CRE12038	chr2:122457225-122457244	GAGGCCCACTGTGCCCGCAT
sgRNA_01024	CRE12050	chr2:128284129-128284148	GACGCAACAGCAATGACGCC
sgRNA_01025	CRE12050	chr2:128284150-128284169	GTCTCCTTTCCGGCCGTGCC
sgRNA_01026	CRE12050	chr2:128284371-128284390	AAACCACTGTCTTTCCCGTC
sgRNA_01027	CRE12050	chr2:128284343-128284362	GACGGAAAAGTCATTTGAGC
sgRNA_01028	CRE12050	chr2:128284624-128284643	CCTGATGAAACACCGGAGGA
sgRNA_01029	CRE12073	chr2:131484961-131484980	GAGGCAGCAGAGCCATTCGC
sgRNA_01030	CRE12073	chr2:131485151-131485170	GTAATCGGCCAAAAAGGCGC
sgRNA_01031	CRE12073	chr2:131485152-131485171	TGCGCCTTTTTGGCCGATTA
sgRNA_01032	CRE12073	chr2:131485145-131485164	TGTACCGTAATCGGCCAAAA
sgRNA_01033	CRE12073	chr2:131485318-131485337	GCTGCGATGATGGTGGTCCG
sgRNA_01034	CRE12074	chr2:131555307-131555326	CGGGGCGTCTTCCGGATGCG
sgRNA_01035	CRE12074	chr2:131555413-131555432	AGCGAGATCCGCTTTCCTAG
sgRNA_01036	CRE12074	chr2:131555458-131555477	CAGGACTGGCTTCGCACCAC
sgRNA_01037	CRE12074	chr2:131555560-131555579	GCCGAGGCGGCCGAACGCCT
sgRNA_01038	CRE12074	chr2:131555564-131555583	GCCAAGGCGTTCGGCCGCCT
sgRNA_01039	CRE12107	chr2:136874802-136874821	GGCAGCTGCGCGGTGTCAAA
sgRNA_01040	CRE12107	chr2:136874856-136874875	ACCCCAAACTCTCGAACTGC
sgRNA_01041	CRE12107	chr2:136874868-136874887	CGAACTGCAGGACCCACTCG
sgRNA_01042	CRE12107	chr2:136874987-136875006	ATCCCCTCAGAGGATCGGCG
sgRNA_01043	CRE12107	chr2:136875249-136875268	GACCGGTGGTCTGAGTCCCG
sgRNA_01044	CRE12109	chr2:136894000-136894019	GACATCATGTACTAACTCAA
sgRNA_01045	CRE12109	chr2:136894271-136894290	GATTACCTAACACCCCACTG
sgRNA_01046	CRE12109	chr2:136894235-136894254	CAGTTTGGAAGGTTGGCACA
sgRNA_01047	CRE12109	chr2:136894263-136894282	TGAAACCACAGTGGGGTGTT
sgRNA_01048	CRE12109	chr2:136894746-136894765	ATAGGGCGGTGCAGTACAGT
sgRNA_01049	CRE12110	chr2:137003720-137003739	TCACAGCCTGATATCGGGGG
sgRNA_01050	CRE12110	chr2:137003928-137003947	CACGTAGGCGCCGTTCTTAA
sgRNA_01051	CRE12110	chr2:137003938-137003957	CGCCTACGTGATGAAATGCC
sgRNA_01052	CRE12110	chr2:137003943-137003962	GCCCTGGCATTTCATCACGT
sgRNA_01053	CRE12110	chr2:137004094-137004113	GCAGGGGGTTGGGATTACCT
sgRNA_01054	CRE12122	chr2:144560588-144560607	TTTTTCAAAGGGAAGGTGTC
sgRNA_01055	CRE12122	chr2:144560788-144560807	TTTAATCACCTCTTCTTATA
sgRNA_01056	CRE12122	chr2:144560770-144560789	AACACAAACAACACAGATTG
sgRNA_01057	CRE12122	chr2:144560769-144560788	ACACAAACAACACAGATTGA
sgRNA_01058	CRE12122	chr2:144560995-144561014	TTGCAACAAGGCAAGTATGA
sgRNA_01059	CRE12145	chr2:152684923-152684942	GCTCGTCGCAGACAACGCGG
sgRNA_01060	CRE12145	chr2:152685094-152685113	TTATGCAAATAAGCGAGGAC
sgRNA_01061	CRE12145	chr2:152685113-152685132	ACCAAGACTGCGGAAGGCGC
sgRNA_01062	CRE12145	chr2:152685099-152685118	CTTGGTTATGCAAATAAGCG
sgRNA_01063	CRE12145	chr2:152685411-152685430	TTAAGGTGACTATCTAGGTA
sgRNA_01064	CRE12149	chr2:153574554-153574573	AGGGAAGTTGTAGTACGGGT
sgRNA_01065	CRE12149	chr2:153574754-153574773	AAGCCTCATCTTTTCGACGC
sgRNA_01066	CRE12149	chr2:153574930-153574949	TTCGACCAGAGCTCGACCCC
sgRNA_01067	CRE12149	chr2:153574929-153574948	TCGACCAGAGCTCGACCCCA
sgRNA_01068	CRE12149	chr2:153574976-153574995	CGGGTTGCAAAGGAAGCCGC
sgRNA_01069	CRE12157	chr2:157198207-157198226	CGAACCCGCCAGAGGTGTAG
sgRNA_01070	CRE12157	chr2:157198392-157198411	TTCGCGCTACACACCCAGAT
sgRNA_01071	CRE12157	chr2:157198328-157198347	TATTATCTCGGCTTCTCGGG
sgRNA_01072	CRE12157	chr2:157198974-157198993	CCGCTGACGCGCTTGGCCGC
sgRNA_01073	CRE12157	chr2:157198971-157198990	CCCGCGGCCAAGCGCGTCAG
sgRNA_01074	CRE12164	chr2:158309712-158309731	TTTGTGATGGTAAAGGGCAT
sgRNA_01075	CRE12164	chr2:158309831-158309850	AGAAGATTTGGATTTCGAAA
sgRNA_01076	CRE12164	chr2:158309817-158309836	TCGAAATGGAACTGTGTGTG
sgRNA_01077	CRE12164	chr2:158309890-158309909	AGGATGCTAAGTAAGGGAAG
sgRNA_01078	CRE12164	chr2:158310085-158310104	AAATCACCTAGATTTCATGC
sgRNA_01079	CRE12168	chr2:158732601-158732620	CCCCGGCTCTTTCCCCCGGG
sgRNA_01080	CRE12168	chr2:158732787-158732806	AAAGTTCCCCCTGCGCCGAG
sgRNA_01081	CRE12168	chr2:158732788-158732807	AAGTTCCCCCTGCGCCGAGG
sgRNA_01082	CRE12168	chr2:158732978-158732997	GAGGGGAGAGAGGAGGCGGC
sgRNA_01083	CRE12168	chr2:158732977-158732996	CCGCCTCCTCTCTCCCCTCC
sgRNA_01084	CRE12169	chr2:159071115-159071134	AGTTGATGACTCATGTCATC
sgRNA_01085	CRE12169	chr2:159071110-159071129	ATGACTCATGTCATCAGGGT
sgRNA_01086	CRE12169	chr2:159071114-159071133	GTTGATGACTCATGTCATCA
sgRNA_01087	CRE12169	chr2:159071234-159071253	TACTGAAGGAAACTTATAAT
sgRNA_01088	CRE12169	chr2:159071383-159071402	CCCAGGCTGGAGATTAAATT
sgRNA_01089	CRE12175	chr2:160373021-160373040	GGTTGTGTTAGGTAGATTTT
sgRNA_01090	CRE12175	chr2:160372984-160373003	GAGCATTGTAAATGCTTACT
sgRNA_01091	CRE12175	chr2:160373205-160373224	ACGTGAGCATTCACGTTTGC
sgRNA_01092	CRE12175	chr2:160372822-160372841	GCTCTGAATCGAAAGGATAA
sgRNA_01093	CRE12175	chr2:160372906-160372925	CAAAGCTAGGACACAATAGT
sgRNA_01094	CRE12175	chr2:160372857-160372876	AATATCACGGCTTGTTGTTT
sgRNA_01095	CRE12175	chr2:160372933-160372952	AAGACATATGCTGACCCTTG
sgRNA_01096	CRE12175	chr2:160372829-160372848	TGTCACTGCTCTGAATCGAA
sgRNA_01097	CRE1218	chr1:150159277-150159296	GATGGAAAGTCGCTATTCCT
sgRNA_01098	CRE1218	chr1:150159453-150159472	CAACTACTGCTTCTGAGGTC
sgRNA_01099	CRE1218	chr1:150159382-150159401	TGTGAGCTTTTGCCAGAGAA
sgRNA_01100	CRE1218	chr1:150159381-150159400	GTGAGCTTTTGCCAGAGAAA
sgRNA_01101	CRE1218	chr1:150159633-150159652	ACTGGAAGATAAGTGACTAT
sgRNA_01102	CRE12192	chr2:162849136-162849155	AGGGAAACTGCCAGCAACGC
sgRNA_01103	CRE12192	chr2:162849166-162849185	TGGAGTCTTTTCAACTGCTG
sgRNA_01104	CRE12192	chr2:162849146-162849165	CAGTTTCCCTTACATTTCTT
sgRNA_01105	CRE12192	chr2:162849315-162849334	CGTGTTGGTATGCTTGGACT
sgRNA_01106	CRE12192	chr2:162849557-162849576	TTTAAACAATAAAACCCGAC
sgRNA_01107	CRE122	chr1:8877431-8877450	CTGAAAGATCTGCCCGACCG
sgRNA_01108	CRE122	chr1:8877704-8877723	GAACAGCGGCACCTCCGCGA
sgRNA_01109	CRE122	chr1:8877718-8877737	CGGCTCCGCCACCATCGCGG
sgRNA_01110	CRE122	chr1:8877707-8877726	CAGCGGCACCTCCGCGATGG
sgRNA_01111	CRE122	chr1:8877933-8877952	GCAGAGAAGAAGGCGGAGAG
sgRNA_01112	CRE12234	chr2:172290595-172290614	CTGTGCTGCGAGTGGCTAGC
sgRNA_01113	CRE12234	chr2:172290632-172290651	ACAGCGCAGCCTCCGCGGGC
sgRNA_01114	CRE12234	chr2:172290594-172290613	TGTGCTGCGAGTGGCTAGCT
sgRNA_01115	CRE12234	chr2:172290794-172290813	TCCGGCCGGCCGCGCGGTAC
sgRNA_01116	CRE12234	chr2:172290911-172290930	GCTTTCCCTCGCCCCGCCGT
sgRNA_01117	CRE12247	chr2:173940221-173940240	CTAGAGAATTAACTCTTGCG
sgRNA_01118	CRE12247	chr2:173940611-173940630	CCTAACTGCAGCGGAAACGT
sgRNA_01119	CRE12247	chr2:173940622-173940641	CGGAAACGTGGGAGCCGCGC
sgRNA_01120	CRE12247	chr2:173940793-173940812	CGAGTCGTCCCTGCGTCTCG
sgRNA_01121	CRE12247	chr2:173940791-173940810	CGCGAGTCGTCCCTGCGTCT
sgRNA_01122	CRE12249	chr2:174218996-174219015	GAAGCCGACTTGTTTACTTG
sgRNA_01123	CRE12249	chr2:174219323-174219342	CTGAGCGAGTGGCGCGAAAA
sgRNA_01124	CRE12249	chr2:174219306-174219325	AAATGGTTCGTATTGCCCCG
sgRNA_01125	CRE12249	chr2:174219478-174219497	ACCTAGTCTTGCGCCATGTC
sgRNA_01126	CRE12249	chr2:174219525-174219544	TCTTTCCCGCGTTGGGACAC
sgRNA_01127	CRE1225	chr1:150266087-150266106	GGGCGAGAAACGTGTTTCGG
sgRNA_01128	CRE1225	chr1:150266297-150266316	GGCTAGGTACTGAGCGCGCG
sgRNA_01129	CRE1225	chr1:150266290-150266309	TCAGTACCTAGCCCACCGGA
sgRNA_01130	CRE1225	chr1:150266289-150266308	CAGTACCTAGCCCACCGGAA
sgRNA_01131	CRE1225	chr1:150266473-150266492	GAGCGACAAGGATGCGCCAC
sgRNA_01132	CRE12262	chr2:176032622-176032641	CTTAGCCCTTGGGGCGATTG
sgRNA_01133	CRE12262	chr2:176032805-176032824	AGGGCTCGCGGGTGACCGAA
sgRNA_01134	CRE12262	chr2:176033115-176033134	AGCACTCGGGCGCTCATGAT
sgRNA_01135	CRE12262	chr2:176033132-176033151	GATTGGACAAGGAGCCCGAA
sgRNA_01136	CRE12262	chr2:176033121-176033140	CGGGCGCTCATGATTGGACA
sgRNA_01137	CRE12263	chr2:176045994-176046013	AATGGGGCAACCTTCGGGCG
sgRNA_01138	CRE12263	chr2:176046302-176046321	TGAGGCGCCGGCACAATGAA
sgRNA_01139	CRE12263	chr2:176046303-176046322	GAGGCGCCGGCACAATGAAT
sgRNA_01140	CRE12263	chr2:176046437-176046456	CTCAATGCGCAAGCGCGGTC
sgRNA_01141	CRE12263	chr2:176046432-176046451	TGGGACTCAATGCGCAAGCG
sgRNA_01142	CRE12270	chr2:178029492-178029511	TCACTGCATCTTTAGGGCTC
sgRNA_01143	CRE12270	chr2:178029475-178029494	CTCTGGCGCCAGCTAGTGGT
sgRNA_01144	CRE12270	chr2:178029552-178029571	AAACTGATCGTAGTTATTCA
sgRNA_01145	CRE12270	chr2:178029553-178029572	AACTGATCGTAGTTATTCAA
sgRNA_01146	CRE12270	chr2:178029824-178029843	TTAACAGAGCATTATATAAC
sgRNA_01147	CRE12272	chr2:178129546-178129565	TTTCGGAAGCTCAGCCCGCG
sgRNA_01148	CRE12272	chr2:178129500-178129519	GACTCTTGCCCCGCCCTTGT
sgRNA_01149	CRE12272	chr2:178129682-178129701	GGCAAACTGAACGCCGGCAC
sgRNA_01150	CRE12272	chr2:178129681-178129700	GCAAACTGAACGCCGGCACC
sgRNA_01151	CRE12272	chr2:178129889-178129908	CTCACTTTACCGCCCGAGAA
sgRNA_01152	CRE12278	chr2:178483285-178483304	ACAGGCCGGCACGGCTCCTG
sgRNA_01153	CRE12278	chr2:178483616-178483635	AAGGGGAAAGACGACTACTC
sgRNA_01154	CRE12278	chr2:178483617-178483636	AGGGGAAAGACGACTACTCC
sgRNA_01155	CRE12278	chr2:178483583-178483602	AAATATTCTGGACTGCAGCG
sgRNA_01156	CRE12278	chr2:178483737-178483756	CGAGTCGGGTCGGTGCAACA
sgRNA_01157	CRE12282	chr2:179315531-179315550	AACCCTCGCCGCCGAGAGGG
sgRNA_01158	CRE12282	chr2:179315707-179315726	GTCCTCGCGCTCCAGCGGCG
sgRNA_01159	CRE12282	chr2:179315705-179315724	CTGTCCTCGCGCTCCAGCGG
sgRNA_01160	CRE12282	chr2:179315704-179315723	CGCTGGAGCGCGAGGACAGT
sgRNA_01161	CRE12282	chr2:179316073-179316092	GGCGGGCGCGGAGAACCCCC
sgRNA_01162	CRE1230	chr1:150534285-150534304	GTGCGGGGGACCGCGAGTGT
sgRNA_01163	CRE1230	chr1:150534425-150534444	GATAAAACTGACGTCAGCCC
sgRNA_01164	CRE1230	chr1:150534426-150534445	ATAAAACTGACGTCAGCCCA
sgRNA_01165	CRE1230	chr1:150534430-150534449	AACTGACGTCAGCCCAGGGC
sgRNA_01166	CRE1230	chr1:150534571-150534590	TTCGGCCTTCTATACCTACT
sgRNA_01167	CRE12300	chr2:182322901-182322920	ACGTGCACGTGTCTCGCTTT
sgRNA_01168	CRE12300	chr2:182323090-182323109	CCCTATGGTGGGGTCCACAT
sgRNA_01169	CRE12300	chr2:182323101-182323120	TCCAGGACTTGCCCTATGGT
sgRNA_01170	CRE12300	chr2:182323100-182323119	CCAGGACTTGCCCTATGGTG
sgRNA_01171	CRE12300	chr2:182323345-182323364	TAGACTCTCTCAGCGTATTA
sgRNA_01172	CRE12310	chr2:185463731-185463750	CGGACACTTTCGCAACATCA
sgRNA_01173	CRE12310	chr2:185463998-185464017	TGAGATAGTCCAGAGCATTG
sgRNA_01174	CRE12310	chr2:185464118-185464137	AAGAGGTTATGGGGTAACTT
sgRNA_01175	CRE12310	chr2:185464119-185464138	AAAGAGGTTATGGGGTAACT
sgRNA_01176	CRE12310	chr2:185464117-185464136	AGAGGTTATGGGGTAACTTG
sgRNA_01177	CRE12329	chr2:191272343-191272362	TAGTTAAACACGCAGAGAGT
sgRNA_01178	CRE12329	chr2:191272342-191272361	AGTTAAACACGCAGAGAGTT
sgRNA_01179	CRE12329	chr2:191272341-191272360	GTTAAACACGCAGAGAGTTG
sgRNA_01180	CRE12329	chr2:191272671-191272690	GGCTCAGCGGAAGTCGCTTG
sgRNA_01181	CRE12329	chr2:191272971-191272990	AGCGGGAGAGAAGGTCGCGC
sgRNA_01182	CRE12334	chr2:191746135-191746154	CCCGGGGAGACGGACGCGTT
sgRNA_01183	CRE12334	chr2:191746345-191746364	CGGGGCCGGGCCTAATCACA
sgRNA_01184	CRE12334	chr2:191746330-191746349	TCACATGGCGCAGACGGCGC
sgRNA_01185	CRE12334	chr2:191746337-191746356	CTGCGCCATGTGATTAGGCC
sgRNA_01186	CRE12334	chr2:191746567-191746586	CGTGCAGCATCGCCCACGAA
sgRNA_01187	CRE12348	chr2:196352162-196352181	AGGCAACGGCTGCAATAATA
sgRNA_01188	CRE12348	chr2:196352163-196352182	GGCAACGGCTGCAATAATAA
sgRNA_01189	CRE12348	chr2:196352195-196352214	CATTTAAAGTTCAGTTCACC
sgRNA_01190	CRE12348	chr2:196352334-196352353	ATTGTCAGGGATAGTTAAGT
sgRNA_01191	CRE12348	chr2:196352544-196352563	GGAAAAAAAACAATACTACA
sgRNA_01192	CRE12349	chr2:196397690-196397709	CTTCAGAGAGCTCTTACGAT
sgRNA_01193	CRE12349	chr2:196397793-196397812	CTCTTCGACTGCTTTATAGA
sgRNA_01194	CRE12349	chr2:196397763-196397782	ATGAAGTGGCAGCATGTTGA
sgRNA_01195	CRE12349	chr2:196397829-196397848	CTGTCTCAAGGAGATAGATG
sgRNA_01196	CRE12349	chr2:196397979-196397998	TCTCCATACTGTATTACAAT
sgRNA_01197	CRE12352	chr2:196424393-196424412	GAGCCTAGAAATGCCTGACT
sgRNA_01198	CRE12352	chr2:196424433-196424452	GAACTTGCCACTTTCATGAG
sgRNA_01199	CRE12352	chr2:196424387-196424406	GCATTTCTAGGCTCATCTGT
sgRNA_01200	CRE12352	chr2:196424586-196424605	AACAAGTATGCGTTACATGC
sgRNA_01201	CRE12352	chr2:196424771-196424790	AACTGTCATCCTTATGGAGC
sgRNA_01202	CRE12359	chr2:196977971-196977990	AAACCTCTCAGCCCGGTACA
sgRNA_01203	CRE12359	chr2:196978149-196978168	GATTTGCCATAGCGGTTTCT
sgRNA_01204	CRE12359	chr2:196978140-196978159	ACATTCCCAAGAAACCGCTA
sgRNA_01205	CRE12359	chr2:196978153-196978172	ACCGCTATGGCAAATCTCAC
sgRNA_01206	CRE12359	chr2:196978371-196978390	CCACAGTGACACAGTGATAC
sgRNA_01207	CRE12366	chr2:197583746-197583765	TTCTCTTTGTCAGCAAGTGC
sgRNA_01208	CRE12366	chr2:197583974-197583993	TGCTGTAACATGACCACAGT
sgRNA_01209	CRE12366	chr2:197583975-197583994	GCTGTAACATGACCACAGTT
sgRNA_01210	CRE12366	chr2:197583958-197583977	AGCATACACATTAACCAGAG
sgRNA_01211	CRE12366	chr2:197584223-197584242	GGGAAACTTTCAGCGACAAT
sgRNA_01212	CRE12367	chr2:197664215-197664234	AGTGAGGCGATGCTAGGCCA
sgRNA_01213	CRE12367	chr2:197664364-197664383	CGGTTCTCTGTCCCGGTTCC
sgRNA_01214	CRE12367	chr2:197664363-197664382	GGTTCTCTGTCCCGGTTCCT
sgRNA_01215	CRE12367	chr2:197664320-197664339	AAACATGTCAGGGTTCAGTC
sgRNA_01216	CRE12367	chr2:197664677-197664696	AAAAAAAAAAAAAATGGATT
sgRNA_01217	CRE12382	chr2:198505309-198505328	CACCGTGCGCGAGCCGAAGC
sgRNA_01218	CRE12382	chr2:198505308-198505327	ACCGTGCGCGAGCCGAAGCA
sgRNA_01219	CRE12382	chr2:198505304-198505323	GCCCTGCTTCGGCTCGCGCA
sgRNA_01220	CRE12382	chr2:198505520-198505539	ACTCTTACCGATATGTCAAT
sgRNA_01221	CRE12382	chr2:198505640-198505659	CTCCTTTGAAGGCTGACGTA
sgRNA_01222	CRE12402	chr2:201577591-201577610	AGAAAAGTATACCCACTGGC
sgRNA_01223	CRE12402	chr2:201577939-201577958	GGTGTCAGAGTGCAGCAAAA
sgRNA_01224	CRE12402	chr2:201577938-201577957	AGGTGTCAGAGTGCAGCAAA
sgRNA_01225	CRE12402	chr2:201577909-201577928	AAGCAGCTTTTTCTCTGCTG
sgRNA_01226	CRE12402	chr2:201578137-201578156	TGCCCAGCTCTGTAACAACC
sgRNA_01227	CRE12404	chr2:201676148-201676167	AACTCCGCCCATCCCGGCCA
sgRNA_01228	CRE12404	chr2:201676142-201676161	GGAGCGAACTCCGCCCATCC
sgRNA_01229	CRE12404	chr2:201676316-201676335	GACGCGTCCAACTTCGAGAC
sgRNA_01230	CRE12404	chr2:201676322-201676341	TCCAACTTCGAGACCGGCGG
sgRNA_01231	CRE12404	chr2:201676627-201676646	GGCGTTAGTTCCGGTCGCAG
sgRNA_01232	CRE12428	chr2:203499603-203499622	CCGAGCTGCTCGTAGCCAAT
sgRNA_01233	CRE12428	chr2:203499602-203499621	CCCGAGCTGCTCGTAGCCAA
sgRNA_01234	CRE12428	chr2:203499599-203499618	GCTACGAGCAGCTCGGGTCC
sgRNA_01235	CRE12428	chr2:203499797-203499816	GGCTTCGTCACCCCGTCTTG
sgRNA_01236	CRE12428	chr2:203499915-203499934	CCCAGCGGGTGAGGCGCAAT
sgRNA_01237	CRE1243	chr1:151118965-151118984	TGCGCTGAGTTCGCAATCCG
sgRNA_01238	CRE1243	chr1:151119099-151119118	GAAAACAATGCGACCGCCCG
sgRNA_01239	CRE1243	chr1:151119097-151119116	AGGAAAACAATGCGACCGCC
sgRNA_01240	CRE1243	chr1:151119248-151119267	GCCAATAGTGCTGCCCGGGG
sgRNA_01241	CRE1243	chr1:151119249-151119268	TCCCCGGGCAGCACTATTGG
sgRNA_01242	CRE12435	chr2:204192599-204192618	GTGAAAGATCACACCTCAAC
sgRNA_01243	CRE12435	chr2:204192873-204192892	ACCAACTCCCGCGCGCATCC
sgRNA_01244	CRE12435	chr2:204192883-204192902	GTAGGGGCCGGGATGCGCGC
sgRNA_01245	CRE12435	chr2:204192877-204192896	GCCGGGATGCGCGCGGGAGT
sgRNA_01246	CRE12435	chr2:204193120-204193139	GACGGCGGCGGTAACTCGGA
sgRNA_01247	CRE12448	chr2:206950574-206950593	ATCCCCGGGCTCCCGTAGGG
sgRNA_01248	CRE12448	chr2:206950826-206950845	CCCTTAATAATCACCGACCC
sgRNA_01249	CRE12448	chr2:206950825-206950844	CCTTAATAATCACCGACCCT
sgRNA_01250	CRE12448	chr2:206950822-206950841	CCCAGGGTCGGTGATTATTA
sgRNA_01251	CRE12448	chr2:206951157-206951176	ACGTTTTCATTTGCTCCAGG
sgRNA_01252	CRE1245	chr1:151138244-151138263	AGGTCCGCTCCGCATAAGAT
sgRNA_01253	CRE1245	chr1:151138469-151138488	CACGCATGCATTGCGCGATC
sgRNA_01254	CRE1245	chr1:151138467-151138486	CGGATCGCGCAATGCATGCG
sgRNA_01255	CRE1245	chr1:151138492-151138511	GTGCGTCCCCGGAAGTACGG
sgRNA_01256	CRE1245	chr1:151138901-151138920	CCTATCCCGCTGATCCCGTC
sgRNA_01257	CRE12458	chr2:208394098-208394117	GGGCGTCGTGGGACCCCCGT
sgRNA_01258	CRE12458	chr2:208394608-208394627	AGCTCGGCTGTTTCCGTGCG
sgRNA_01259	CRE12458	chr2:208394608-208394627	CGCACGGAAACAGCCGAGCT
sgRNA_01260	CRE12458	chr2:208394557-208394576	CAAGTTCCGTCCCCAGCGCG
sgRNA_01261	CRE12458	chr2:208394925-208394944	GCGCCGGACACCCGCGCTTG
sgRNA_01262	CRE12459	chr2:208489530-208489549	CGGCCCGGGTTCTTTCGCTA
sgRNA_01263	CRE12459	chr2:208489714-208489733	TGTCCCCGCGAGCCGCTTGG
sgRNA_01264	CRE12459	chr2:208489904-208489923	TCACGGCGCCCCGTATGGCC
sgRNA_01265	CRE12459	chr2:208489909-208489928	GCAGCTCACGGCGCCCCGTA
sgRNA_01266	CRE12459	chr2:208489903-208489922	CACGGCGCCCCGTATGGCCT
sgRNA_01267	CRE12463	chr2:208575913-208575932	CTCGGAAGAAGAGTTGCTAA
sgRNA_01268	CRE12463	chr2:208576188-208576207	ACCGCAGGTCGCGTTCCGGT
sgRNA_01269	CRE12463	chr2:208576237-208576256	CGCCGCCGCCTACCGACTGA
sgRNA_01270	CRE12463	chr2:208576192-208576211	GCCAACCGGAACGCGACCTG
sgRNA_01271	CRE12463	chr2:208576525-208576544	TGCCGGCCGCGCCATTGTTG
sgRNA_01272	CRE12465	chr2:208890023-208890042	TAAATATCCGAGCAGCTCCC
sgRNA_01273	CRE12465	chr2:208890064-208890083	ATCCCCCAAACTGGCCGGCC
sgRNA_01274	CRE12465	chr2:208890330-208890349	AAAGACTCGTCCTCGCGGCC
sgRNA_01275	CRE12465	chr2:208890335-208890354	GCAGGAAAGACTCGTCCTCG
sgRNA_01276	CRE12465	chr2:208890533-208890552	AGAACATGTCAGGATCGGGC
sgRNA_01277	CRE12475	chr2:213551452-213551471	AGCTATAACTGTAGTCTCTC
sgRNA_01278	CRE12475	chr2:213551447-213551466	TAACTGTAGTCTCTCAGGAA
sgRNA_01279	CRE12475	chr2:213551467-213551486	TAGCTTTGACTTTATTGTTC
sgRNA_01280	CRE12475	chr2:213551620-213551639	TGTAAACTAGAGGTCCTTAA
sgRNA_01281	CRE12475	chr2:213551810-213551829	GAGAATCGCTTGAACCCGGG
sgRNA_01282	CRE12490	chr2:216946324-216946343	TGGGTACGTGAGCGGGCCGC
sgRNA_01283	CRE12490	chr2:216946513-216946532	CAGGGACATTCGAGGCGGGC
sgRNA_01284	CRE12490	chr2:216946509-216946528	GTCTCAGGGACATTCGAGGC
sgRNA_01285	CRE12490	chr2:216946508-216946527	GGTCTCAGGGACATTCGAGG
sgRNA_01286	CRE12490	chr2:216946667-216946686	ACCGACGCTGGCGGAGGTTG
sgRNA_01287	CRE12493	chr2:217276934-217276953	GAGACAGCCGACTCCGGGTT
sgRNA_01288	CRE12493	chr2:217277221-217277240	CCAGCCTTATTGTAGCGGCC
sgRNA_01289	CRE12493	chr2:217277214-217277233	CAGGCCTGGCCGCTACAATA
sgRNA_01290	CRE12493	chr2:217277226-217277245	GTTCGCCAGCCTTATTGTAG
sgRNA_01291	CRE12493	chr2:217277337-217277356	ACGCGAGCCACATTCGCCCC
sgRNA_01292	CRE12498	chr2:217557744-217557763	CGGAGACAGTTTAGTTACGG
sgRNA_01293	CRE12498	chr2:217558003-217558022	AATTTGGGGGCGGCGCAACC
sgRNA_01294	CRE12498	chr2:217558004-217558023	ATTTGGGGGCGGCGCAACCC
sgRNA_01295	CRE12498	chr2:217558005-217558024	TTTGGGGGCGGCGCAACCCG
sgRNA_01296	CRE12498	chr2:217558085-217558104	ATTTTGCATTCTGCGTTTCC
sgRNA_01297	CRE12502	chr2:218990361-218990380	CACTGAAATAACTTTCGCCA
sgRNA_01298	CRE12502	chr2:218990587-218990606	GAATCCCCGCACCTGACTGT
sgRNA_01299	CRE12502	chr2:218990580-218990599	GGGTCCCACAGTCAGGTGCG
sgRNA_01300	CRE12502	chr2:218990588-218990607	TGAATCCCCGCACCTGACTG
sgRNA_01301	CRE12502	chr2:218990673-218990692	TTCAGACAAGTCCGTTGGCG
sgRNA_01302	CRE1251	chr1:151319396-151319415	GTGGGGGCGCGCCTCAGGAT
sgRNA_01303	CRE1251	chr1:151319629-151319648	GTTGGAAGGCGACTGTTCAG
sgRNA_01304	CRE1251	chr1:151319848-151319867	AGGCGCCGGGCTCGTACCGG
sgRNA_01305	CRE1251	chr1:151319856-151319875	AGCGGCCGCCGGTACGAGCC
sgRNA_01306	CRE1251	chr1:151319845-151319864	AGAAGGCGCCGGGCTCGTAC
sgRNA_01307	CRE12525	chr2:220042671-220042690	GATTCCCAGTATCCCCGGTA
sgRNA_01308	CRE12525	chr2:220042948-220042967	GGACGAGCGTCACGTGACTG
sgRNA_01309	CRE12525	chr2:220042998-220043017	CGGGGGCGCGTCAGGCGGAA
sgRNA_01310	CRE12525	chr2:220042999-220043018	CCGGGGGCGCGTCAGGCGGA
sgRNA_01311	CRE12525	chr2:220043208-220043227	GCGTCCCACCGCCTCGGCCG
sgRNA_01312	CRE1254	chr1:151445814-151445833	CTGGAGGGAAAAGTTACCCG
sgRNA_01313	CRE1254	chr1:151445918-151445937	GGTGGGTGGGTATACCGGGA
sgRNA_01314	CRE1254	chr1:151445919-151445938	GTGGGTGGGTATACCGGGAG
sgRNA_01315	CRE1254	chr1:151445917-151445936	GGGTGGGTGGGTATACCGGG
sgRNA_01316	CRE1254	chr1:151446125-151446144	TCGAGGTCTGAACCCTCGAG
sgRNA_01317	CRE12550	chr2:224702047-224702066	GGTGCGGGCCGAGTCCCGCC
sgRNA_01318	CRE12550	chr2:224702263-224702282	GAGGCGCCCGGCTTAGACCA
sgRNA_01319	CRE12550	chr2:224702248-224702267	GCCTCACCTGTCAGCCGCAC
sgRNA_01320	CRE12550	chr2:224702239-224702258	CTGGAGCCGGTGCGGCTGAC
sgRNA_01321	CRE12550	chr2:224702560-224702579	AGCGAATGCACCTGCGCGCG
sgRNA_01322	CRE12556	chr2:225795064-225795083	CCGTGGTTGGACTAGGCCAC
sgRNA_01323	CRE12556	chr2:225795128-225795147	AACGGCTTCCACTTGAGTGC
sgRNA_01324	CRE12556	chr2:225795077-225795096	AGAGATCTCATTTCCGTGGT
sgRNA_01325	CRE12556	chr2:225795260-225795279	TCTTTTTCATGAATCCATGG
sgRNA_01326	CRE12556	chr2:225795388-225795407	AGACCCATGCTCCCTGATAG
sgRNA_01327	CRE12572	chr2:230877071-230877090	ACGGTCTCAAACTGGCACCG
sgRNA_01328	CRE12572	chr2:230877189-230877208	GAGCCTGACGTGGTTATGTC
sgRNA_01329	CRE12572	chr2:230877195-230877214	AATCCAGACATAACCACGTC
sgRNA_01330	CRE12572	chr2:230877179-230877198	AGCAGATGAGGAGCCTGACG
sgRNA_01331	CRE12572	chr2:230877384-230877403	ATTAGGCCATGAGTGAAGTC
sgRNA_01332	CRE12576	chr2:231191624-231191643	GAGTCCACTTGCTTGTGCAA
sgRNA_01333	CRE12576	chr2:231191783-231191802	CACGGTGTCTGTATCCCAGC
sgRNA_01334	CRE12576	chr2:231191759-231191778	TCCTCCTTTTTCACTCCAAG
sgRNA_01335	CRE12576	chr2:231191801-231191820	GTATTTATTTAACTTCCTGC
sgRNA_01336	CRE12576	chr2:231191912-231191931	TGCACGCAGGCTGGGCCGAC
sgRNA_01337	CRE12589	chr2:231921402-231921421	AGACCAGTGTTCCGTTGCGC
sgRNA_01338	CRE12589	chr2:231921408-231921427	AGTCCCGCGCAACGGAACAC
sgRNA_01339	CRE12589	chr2:231921416-231921435	AGGTCAGGAGTCCCGCGCAA
sgRNA_01340	CRE12589	chr2:231921498-231921517	TACCGCCGCGCAGAAGACGC
sgRNA_01341	CRE12589	chr2:231921698-231921717	TGGAACGGCGAGCGAGCCGA
sgRNA_01342	CRE12626	chr2:234240203-234240222	CGGCCTCCCAGGGTACACGC
sgRNA_01343	CRE12626	chr2:234240326-234240345	TTACGTCAAGCCCGTGGCTA
sgRNA_01344	CRE12626	chr2:234240320-234240339	TGATTATTACGTCAAGCCCG
sgRNA_01345	CRE12626	chr2:234240329-234240348	CGTCAAGCCCGTGGCTATGG
sgRNA_01346	CRE12626	chr2:234240621-234240640	AATGTCACCATGGGATCAGC
sgRNA_01347	CRE1263	chr1:151762899-151762918	GCGCGAGGCGGCGCACTCGA
sgRNA_01348	CRE1263	chr1:151763124-151763143	CCGCTGCCCAATTACCCGGA
sgRNA_01349	CRE1263	chr1:151763134-151763153	TTGGATTCCATCCGGGTAAT
sgRNA_01350	CRE1263	chr1:151763133-151763152	TGGATTCCATCCGGGTAATT
sgRNA_01351	CRE1263	chr1:151763608-151763627	GCGGTGCGCCGCAGAGAGCG
sgRNA_01352	CRE12644	chr2:236575139-236575158	GCCATGTCAAGTGCAACTGT
sgRNA_01353	CRE12644	chr2:236575261-236575280	TCAGTGTCATCTAAGGTGGA
sgRNA_01354	CRE12644	chr2:236575219-236575238	ACAAACACACTGGCTATGGC
sgRNA_01355	CRE12644	chr2:236575233-236575252	TATGGCTGGAAGAGGTTCCC
sgRNA_01356	CRE12644	chr2:236575476-236575495	AAGTAGCTTGTCCATAATTA
sgRNA_01357	CRE12661	chr2:239143043-239143062	CCCGCCAGAGGCGAGCCGCG
sgRNA_01358	CRE12661	chr2:239143206-239143225	ACTGGCTGATCGAGACCGTC
sgRNA_01359	CRE12661	chr2:239143213-239143232	GATCGAGACCGTCCGGGTCC
sgRNA_01360	CRE12661	chr2:239143207-239143226	CTGGCTGATCGAGACCGTCC
sgRNA_01361	CRE12661	chr2:239143408-239143427	TTTGCCACCGACCGAGTCCA
sgRNA_01362	CRE1268	chr1:152432148-152432167	TGCTGTATCTTGTGTAGATC
sgRNA_01363	CRE1268	chr1:152432290-152432309	ACTCCTCTGGGAGTGTGTTA
sgRNA_01364	CRE1268	chr1:152432346-152432365	GAGAGTGGGTAACTCACACA
sgRNA_01365	CRE1268	chr1:152432296-152432315	GGTCCATAACACACTCCCAG
sgRNA_01366	CRE1268	chr1:152432589-152432608	AGGACGCTGGACCTAAAACC
sgRNA_01367	CRE12720	chr20:361604-361623	GCATCACCCGGACCGGGGGC
sgRNA_01368	CRE12720	chr20:361605-361624	CATCACCCGGACCGGGGGCC
sgRNA_01369	CRE12720	chr20:361794-361813	CTCGCCCCGTCGTTCCGCGT
sgRNA_01370	CRE12720	chr20:361792-361811	CCACGCGGAACGACGGGGCG
sgRNA_01371	CRE12720	chr20:361919-361938	GCGTGCGTGCGTGTAACACG
sgRNA_01372	CRE12732	chr20:1373470-1373489	TGCACTACACCGGTGAGTCG
sgRNA_01373	CRE12732	chr20:1373728-1373747	AGGCGACGCGCCGAGGTACT
sgRNA_01374	CRE12732	chr20:1373735-1373754	CGTGCGCAGGCGACGCGCCG
sgRNA_01375	CRE12732	chr20:1373793-1373812	CGGGACGTCGCGCGCCGTGT
sgRNA_01376	CRE12732	chr20:1373791-1373810	CCACACGGCGCGCGACGTCC
sgRNA_01377	CRE12746	chr20:2505085-2505104	GGTCTCCACTTCTTACCGTG
sgRNA_01378	CRE12746	chr20:2505235-2505254	GCCCGGAAGCTCGCGAGTCT
sgRNA_01379	CRE12746	chr20:2505258-2505277	GTTCCTCAGATTCAGCGCGG
sgRNA_01380	CRE12746	chr20:2505257-2505276	AGTTCCTCAGATTCAGCGCG
sgRNA_01381	CRE12746	chr20:2505421-2505440	ATAGTAAGAGGGAAGGGCCA
sgRNA_01382	CRE12748	chr20:2633335-2633354	CGACGCGACGGTGGGGGTTT
sgRNA_01383	CRE12748	chr20:2633361-2633380	CCTGTCTGCGGCCCGAACGC
sgRNA_01384	CRE12748	chr20:2633327-2633346	GGCGCGGGCGACGCGACGGT
sgRNA_01385	CRE12748	chr20:2633500-2633519	GTGCTGTTTGAGCACGCGGT
sgRNA_01386	CRE12748	chr20:2633732-2633751	GCTAGAGCGATTCTACCCAT
sgRNA_01387	CRE12752	chr20:2853970-2853989	AACCCGGTCGCACGTTCTCC
sgRNA_01388	CRE12752	chr20:2853964-2853983	CTACCAGGAGAACGTGCGAC
sgRNA_01389	CRE12752	chr20:2854051-2854070	CGACAGCGAACGGGCGTCTC
sgRNA_01390	CRE12752	chr20:2854049-2854068	CGGAGACGCCCGTTCGCTGT
sgRNA_01391	CRE12752	chr20:2854568-2854587	ATCCTTGCGGGTCCGTCGCG
sgRNA_01392	CRE12759	chr20:3219676-3219695	TCCGCCACCGTCTCCCGTCG
sgRNA_01393	CRE12759	chr20:3219647-3219666	GACGGCATCCGCGTTCTCCC
sgRNA_01394	CRE12759	chr20:3220108-3220127	AGCCCCTAAACTCGCGACGC
sgRNA_01395	CRE12759	chr20:3220107-3220126	GCCCCTAAACTCGCGACGCT
sgRNA_01396	CRE12759	chr20:3220223-3220242	GTCCGCTTTAAGTACGCGGC
sgRNA_01397	CRE12760	chr20:3388115-3388134	CACCCTCCGTCAGGTACGCG
sgRNA_01398	CRE12760	chr20:3388537-3388556	AAGCCCGGCATCATAGAGCG
sgRNA_01399	CRE12760	chr20:3388536-3388555	GCTCTATGATGCCGGGCTTG
sgRNA_01400	CRE12760	chr20:3388544-3388563	AGAGCCCCGCTCTATGATGC
sgRNA_01401	CRE12760	chr20:3388682-3388701	AAGTCTTCCGCTCCGGCGTC
sgRNA_01402	CRE12782	chr20:4701170-4701189	CTTTCTAGCTCTAAACACTG
sgRNA_01403	CRE12782	chr20:4701478-4701497	AGCCCGGGTTTCCCACCGAC
sgRNA_01404	CRE12782	chr20:4701445-4701464	TGGATTTGGGGCCTCCGGTT
sgRNA_01405	CRE12782	chr20:4701594-4701613	GACCCCGTCAGTGTTCACGG
sgRNA_01406	CRE12782	chr20:4701589-4701608	ATCCACCGTGAACACTGACG
sgRNA_01407	CRE12787	chr20:4803976-4803995	CGGCGCGGGCGCGATGCAGC
sgRNA_01408	CRE12787	chr20:4804114-4804133	GCGCCCGGTCCCCAGTCGCG
sgRNA_01409	CRE12787	chr20:4804101-4804120	CAGGCGGTGGCCGCGCGACT
sgRNA_01410	CRE12787	chr20:4804100-4804119	GCAGGCGGTGGCCGCGCGAC
sgRNA_01411	CRE12787	chr20:4804199-4804218	CGGACGAGCAGATCCGGTAG
sgRNA_01412	CRE12804	chr20:5931171-5931190	GGAAGCGGCGTGCAACACGT
sgRNA_01413	CRE12804	chr20:5931138-5931157	CGCACTAGGAGCCCTCCGAC
sgRNA_01414	CRE12804	chr20:5931172-5931191	CGGAAGCGGCGTGCAACACG
sgRNA_01415	CRE12804	chr20:5931430-5931449	CCCGAGCCGTTGAGACAGAT
sgRNA_01416	CRE12804	chr20:5930836-5930855	CTCCACAGAATTCTTCCGCC
sgRNA_01417	CRE12808	chr20:8112780-8112799	CCAGCCCAACTTTGCACGCT
sgRNA_01418	CRE12808	chr20:8112979-8112998	GGAGCAGAATCCGCCGCGAC
sgRNA_01419	CRE12808	chr20:8113008-8113027	GAAGCCGAGCCGGTCAGCCG
sgRNA_01420	CRE12808	chr20:8112992-8113011	GCCGAGGCTGCCAGTCGCGG
sgRNA_01421	CRE12808	chr20:8113177-8113196	GGAGCAGAGTCGAGCGCCTC
sgRNA_01422	CRE1281	chr1:153756011-153756030	AAGGAAGCCCGCGAGCTGCG
sgRNA_01423	CRE1281	chr1:153756142-153756161	AAACCCATCTCGGGCGCTGC
sgRNA_01424	CRE1281	chr1:153756143-153756162	AACCCATCTCGGGCGCTGCT
sgRNA_01425	CRE1281	chr1:153756392-153756411	AGGGGCGAGGCCGGAGTACC
sgRNA_01426	CRE1281	chr1:153756379-153756398	CGCCCCTCCGTTTGTCTTTT
sgRNA_01427	CRE12818	chr20:10485213-10485232	GGCCCATGAATTTCTGCACT
sgRNA_01428	CRE12818	chr20:10485397-10485416	GCTGTGATCCACTGCCTATA
sgRNA_01429	CRE12818	chr20:10485396-10485415	GGCTGTGATCCACTGCCTAT
sgRNA_01430	CRE12818	chr20:10485331-10485350	AAATCCCACAAGCCTCGCAG
sgRNA_01431	CRE12818	chr20:10485536-10485555	ACTGTTCCGACCTATAGCCA
sgRNA_01432	CRE12820	chr20:10594287-10594306	TGCAAAGAAAAGGAGGGCTC
sgRNA_01433	CRE12820	chr20:10594404-10594423	GCTTTGCGTGCAGTACACAG
sgRNA_01434	CRE12820	chr20:10594447-10594466	GTCACCCTTGAAGTCCAGAT
sgRNA_01435	CRE12820	chr20:10594454-10594473	CAGGCCTATCTGGACTTCAA
sgRNA_01436	CRE12820	chr20:10594567-10594586	ATCAAGACTGGGAGGCGTAT
sgRNA_01437	CRE12821	chr20:10654595-10654614	CACAATGACGCGTGCCCGCC
sgRNA_01438	CRE12821	chr20:10654823-10654842	CAGGGCGGCGTAGAAGAACC
sgRNA_01439	CRE12821	chr20:10654824-10654843	AGGGCGGCGTAGAAGAACCA
sgRNA_01440	CRE12821	chr20:10654804-10654823	TTGGGGGCAGCGGGATGCTC
sgRNA_01441	CRE12821	chr20:10655066-10655085	GCTGACGCAGGCGGTTCGGA
sgRNA_01442	CRE1283	chr1:153895372-153895391	AGACACTGCGGTACAGACGG
sgRNA_01443	CRE1283	chr1:153895664-153895683	GTCTAGCGGGGGCGCGTTAA
sgRNA_01444	CRE1283	chr1:153895665-153895684	TCTAGCGGGGGCGCGTTAAT
sgRNA_01445	CRE1283	chr1:153895634-153895653	AACCCAATCATAAACGGAGG
sgRNA_01446	CRE1283	chr1:153896055-153896074	TGTCGTGGTTTAGTCACGAC
sgRNA_01447	CRE12833	chr20:17949070-17949089	GCGACGCGGGACTCGAGCAG
sgRNA_01448	CRE12833	chr20:17949593-17949612	GCCTCTAACTGGTGGCGCGT
sgRNA_01449	CRE12833	chr20:17949597-17949616	GCCAACGCGCCACCAGTTAG
sgRNA_01450	CRE12833	chr20:17949570-17949589	GAGTACCTCTCCGAGCGGAA
sgRNA_01451	CRE12833	chr20:17949862-17949881	CGCCGTCCTGGCCCCGCCAG
sgRNA_01452	CRE12896	chr20:29611387-29611406	TGGCGCGTGTTACAGGCTCA
sgRNA_01453	CRE12896	chr20:29611656-29611675	AGGAGGTTCCACAGCGCGCC
sgRNA_01454	CRE12896	chr20:29611688-29611707	CACCGTCAGCACCTGCGCCT
sgRNA_01455	CRE12896	chr20:29611689-29611708	ACCGTCAGCACCTGCGCCTC
sgRNA_01456	CRE12896	chr20:29611873-29611892	AATCTCGGGCATTCACCGTT
sgRNA_01457	CRE12902	chr20:30134803-30134822	TGCTCCGCCATATACAGCAC
sgRNA_01458	CRE12902	chr20:30134996-30135015	TACGAATGCTTTCTCCTTGC
sgRNA_01459	CRE12902	chr20:30134974-30134993	GCATCTGCAGTCTTCTGTTC
sgRNA_01460	CRE12902	chr20:30134979-30134998	TGCAGTCTTCTGTTCCGGCA
sgRNA_01461	CRE12902	chr20:30135151-30135170	GACACAGCCAGCGCGCTTTA
sgRNA_01462	CRE12909	chr20:30310894-30310913	AAGGTTTCAGTGAGGGACGC
sgRNA_01463	CRE12909	chr20:30311163-30311182	AGGGGTCGAGGCCTGCTCGA
sgRNA_01464	CRE12909	chr20:30311308-30311327	AGTGAGCTCGAGAAGCCGCT
sgRNA_01465	CRE12909	chr20:30311343-30311362	CGAGCCACCGCCCCGTTGCT
sgRNA_01466	CRE12909	chr20:30311308-30311327	AGCGGCTTCTCGAGCTCACT
sgRNA_01467	CRE12921	chr20:30945420-30945439	GACGGGTCGTGTAAAGAACT
sgRNA_01468	CRE12921	chr20:30945859-30945878	GTCTCGCGAGGTGCGAGAAC
sgRNA_01469	CRE12921	chr20:30945826-30945845	ATCGCCTCCCAGAATCCCGC
sgRNA_01470	CRE12921	chr20:30945891-30945910	CGGGTCGCTGTTCGGGGAAG
sgRNA_01471	CRE12921	chr20:30946069-30946088	AACAAACCGAAAGGGCGCCT
sgRNA_01472	CRE12953	chr20:32890923-32890942	TCGCAGCCTCGGCGCGTTTC
sgRNA_01473	CRE12953	chr20:32891087-32891106	CTCGTGATGGAAACGGGCGA
sgRNA_01474	CRE12953	chr20:32891074-32891093	CATGCTGGCGGCACTCGTGA
sgRNA_01475	CRE12953	chr20:32891088-32891107	TCGTGATGGAAACGGGCGAA
sgRNA_01476	CRE12953	chr20:32891413-32891432	TGGCGGAATTTCAGTTCCGC
sgRNA_01477	CRE12956	chr20:33104044-33104063	AGGAGCAGTGCGCTAAGCTG
sgRNA_01478	CRE12956	chr20:33104230-33104249	TGTTCGCTACGCGGGGCTAC
sgRNA_01479	CRE12956	chr20:33104222-33104241	TCGCTAAGTGTTCGCTACGC
sgRNA_01480	CRE12956	chr20:33104223-33104242	CGCTAAGTGTTCGCTACGCG
sgRNA_01481	CRE12956	chr20:33104571-33104590	AGGGTTGCCATCGCGCACCA
sgRNA_01482	CRE12983	chr20:34542028-34542047	GCTTCAGGGACCGCGGCGTT
sgRNA_01483	CRE12983	chr20:34542185-34542204	GGCGGCTACGGAGCCGATCT
sgRNA_01484	CRE12983	chr20:34542430-34542449	CGGGTGCTCGCGCGCCGACC
sgRNA_01485	CRE12983	chr20:34542428-34542447	CAGGTCGGCGCGCGAGCACC
sgRNA_01486	CRE12983	chr20:34542393-34542412	CAGCCGGAAGCGAAAGTCTC
sgRNA_01487	CRE12987	chr20:35089410-35089429	GAGGGCCAATCTGACTATGC
sgRNA_01488	CRE12987	chr20:35089644-35089663	GTGGGCGCGCGCTCCTTTCC
sgRNA_01489	CRE12987	chr20:35089645-35089664	TGGGCGCGCGCTCCTTTCCT
sgRNA_01490	CRE12987	chr20:35089649-35089668	CGCGCGCTCCTTTCCTGGGC
sgRNA_01491	CRE12987	chr20:35089959-35089978	GACGACGTGGACCGGACAGA
sgRNA_01492	CRE1299	chr1:154531029-154531048	TCCTCCGCTCCGCTCCGCTC
sgRNA_01493	CRE1299	chr1:154531398-154531417	ACATACGCAAACTCGCACTG
sgRNA_01494	CRE1299	chr1:154531450-154531469	GTCACGTGAGAGGGGAGCGC
sgRNA_01495	CRE1299	chr1:154531386-154531405	TCGCACTGAGGCGCCCACAG
sgRNA_01496	CRE1299	chr1:154531544-154531563	CGAGCCGTGGCGAGCGTGCC
sgRNA_01497	CRE13004	chr20:35807487-35807506	GGTCGGTTCCAAGTGGGCCT
sgRNA_01498	CRE13004	chr20:35807553-35807572	ATCCCAGTCCTCCCGCTCAC
sgRNA_01499	CRE13004	chr20:35807589-35807608	GGAAGCGTCGAAGCTCAGCG
sgRNA_01500	CRE13004	chr20:35807588-35807607	TGGAAGCGTCGAAGCTCAGC
sgRNA_01501	CRE13004	chr20:35807907-35807926	CTCTCGGATCGAGGGTCCGA
sgRNA_01502	CRE13016	chr20:37075276-37075295	GCCTAGAGCGGCGCTTCCGC
sgRNA_01503	CRE13016	chr20:37075275-37075294	CCTAGAGCGGCGCTTCCGCC
sgRNA_01504	CRE13016	chr20:37075272-37075291	CCCGGCGGAAGCGCCGCTCT
sgRNA_01505	CRE13016	chr20:37075381-37075400	GTACAGGGGTAACCGCGCGG
sgRNA_01506	CRE13016	chr20:37075503-37075522	GTACCTCCTCCCCGACAAAA
sgRNA_01507	CRE13017	chr20:37101167-37101186	CTTTCGGTGCAGACGGATAA
sgRNA_01508	CRE13017	chr20:37101392-37101411	TTTCTACGGGGCTGAACCGG
sgRNA_01509	CRE13017	chr20:37101373-37101392	CGGGAATTATTTGACGCCAC
sgRNA_01510	CRE13017	chr20:37101395-37101414	AGCTTTCTACGGGGCTGAAC
sgRNA_01511	CRE13017	chr20:37101700-37101719	CGGTTACCTGAGGCGACGGG
sgRNA_01512	CRE13021	chr20:37433412-37433431	AACCTATTGTTCTAAGGCCA
sgRNA_01513	CRE13021	chr20:37433797-37433816	ATGATGCGAGTCCACACCGC
sgRNA_01514	CRE13021	chr20:37433764-37433783	AAAGAAGGGAGGTGAAGCGC
sgRNA_01515	CRE13021	chr20:37433761-37433780	GAAGGGAGGTGAAGCGCTGG
sgRNA_01516	CRE13021	chr20:37433945-37433964	ACTCAGGGTTCCTAGCTTGA
sgRNA_01517	CRE13038	chr20:39767137-39767156	TGCTACTTTTGTCCCAAAGC
sgRNA_01518	CRE13038	chr20:39767331-39767350	TCCCTGAAGCCACCGGACAG
sgRNA_01519	CRE13038	chr20:39767485-39767504	CAGCACAGGCACGCGCTAAG
sgRNA_01520	CRE13038	chr20:39767494-39767513	TGCCTGTGCTGTGGTCGGAT
sgRNA_01521	CRE13038	chr20:39767485-39767504	CTTAGCGCGTGCCTGTGCTG
sgRNA_01522	CRE13047	chr20:42086046-42086065	AATCTGAGGATCGCGCGCCG
sgRNA_01523	CRE13047	chr20:42086255-42086274	AACTGTGCGCGATCTCTTCG
sgRNA_01524	CRE13047	chr20:42086256-42086275	AAACTGTGCGCGATCTCTTC
sgRNA_01525	CRE13047	chr20:42086257-42086276	AAAACTGTGCGCGATCTCTT
sgRNA_01526	CRE13047	chr20:42086506-42086525	CGCGCCAGGCTTTCGCTATA
sgRNA_01527	CRE13058	chr20:42839041-42839060	CGAAAAGGGGAAGCTGCCGC
sgRNA_01528	CRE13058	chr20:42839539-42839558	CCGACGACTGCGCAGACGCA
sgRNA_01529	CRE13058	chr20:42839542-42839561	CCCTGCGTCTGCGCAGTCGT
sgRNA_01530	CRE13058	chr20:42839602-42839621	GTAAGGCGCACGTGCTTCTG
sgRNA_01531	CRE13058	chr20:42839779-42839798	CACGTAGAGGACCGAGCGCA
sgRNA_01532	CRE13077	chr20:44002429-44002448	GAAGCCTGAAGTCGCGACAC
sgRNA_01533	CRE13077	chr20:44002668-44002687	AGTCTTAGCGCCTAACACCG
sgRNA_01534	CRE13077	chr20:44002674-44002693	TAGGCGCTAAGACTGTCCCC
sgRNA_01535	CRE13077	chr20:44002619-44002638	CGCACCTCTGGCTCTCGTCC
sgRNA_01536	CRE13077	chr20:44002787-44002806	CCCTTTAAGCTAGACCCGGT
sgRNA_01537	CRE13091	chr20:44746749-44746768	CGCATCTTGCTGTGTACGGG
sgRNA_01538	CRE13091	chr20:44746979-44746998	GAGGCAGACGAACCATAGCG
sgRNA_01539	CRE13091	chr20:44747046-44747065	TGCCCCGACCAGACGGGAGT
sgRNA_01540	CRE13091	chr20:44747047-44747066	GCCCCGACCAGACGGGAGTT
sgRNA_01541	CRE13091	chr20:44747270-44747289	CCAAGCGTGCCTAGACGGCC
sgRNA_01542	CRE1310	chr1:155035897-155035916	CATAACCTTTGCCCAGATAG
sgRNA_01543	CRE1310	chr1:155036154-155036173	CGGAAAGTTATTCAGGGGCG
sgRNA_01544	CRE1310	chr1:155036152-155036171	GGCGGAAAGTTATTCAGGGG
sgRNA_01545	CRE1310	chr1:155036153-155036172	GCGGAAAGTTATTCAGGGGC
sgRNA_01546	CRE1310	chr1:155036356-155036375	GGCTGGAGCCCCCGCGCAGA
sgRNA_01547	CRE13151	chr20:49434835-49434854	GAAGGCGTGGGTTTAGGCCC
sgRNA_01548	CRE13151	chr20:49434942-49434961	CGTGGCTTTCCTCTCAGCGC
sgRNA_01549	CRE13151	chr20:49435134-49435153	AGTCTAGCGTCCCCGCTGAA
sgRNA_01550	CRE13151	chr20:49435105-49435124	GCACTCTCGGGCACCGATGC
sgRNA_01551	CRE13151	chr20:49435106-49435125	CACTCTCGGGCACCGATGCA
sgRNA_01552	CRE13154	chr20:50077648-50077667	TAATTTGGGCTGCTGTGCGC
sgRNA_01553	CRE13154	chr20:50077608-50077627	AAAGCTAATTGCTTTGCCTC
sgRNA_01554	CRE13154	chr20:50077607-50077626	AAGCTAATTGCTTTGCCTCT
sgRNA_01555	CRE13154	chr20:50077726-50077745	CTAATTGGGGTGACAGGTCC
sgRNA_01556	CRE13154	chr20:50077933-50077952	GAGGTCAAGACTTCACCCGC
sgRNA_01557	CRE13169	chr20:52268760-52268779	AATTTTACAGAGGCTAAGGT
sgRNA_01558	CRE13169	chr20:52269106-52269125	GTAATTATATGCTGCATCCG
sgRNA_01559	CRE13169	chr20:52268902-52268921	GTATCGTGGCAGTTGAAAAC
sgRNA_01560	CRE13169	chr20:52268846-52268865	CTTAATTCAACAAGGGACAT
sgRNA_01561	CRE13169	chr20:52268843-52268862	AATTCAACAAGGGACATGGG
sgRNA_01562	CRE13169	chr20:52268853-52268872	GTGTACTCTTAATTCAACAA
sgRNA_01563	CRE13169	chr20:52269002-52269021	AGTTGCGCAAAACAGAAAGC
sgRNA_01564	CRE13172	chr20:52294524-52294543	AAGAACATTTTTTTGAATTG
sgRNA_01565	CRE13172	chr20:52294667-52294686	CAGCCGACTCCACTGTAGGT
sgRNA_01566	CRE13172	chr20:52294670-52294689	CCGACTCCACTGTAGGTTGG
sgRNA_01567	CRE13172	chr20:52294679-52294698	TGATTGCCACCAACCTACAG
sgRNA_01568	CRE13172	chr20:52294846-52294865	GCACTTGTAGTATGTTTTTT
sgRNA_01569	CRE13176	chr20:52463945-52463964	TTATCATGTATGCACTAACG
sgRNA_01570	CRE13176	chr20:52463946-52463965	TTTATCATGTATGCACTAAC
sgRNA_01571	CRE13176	chr20:52463947-52463966	TTTTATCATGTATGCACTAA
sgRNA_01572	CRE13176	chr20:52464035-52464054	AGTGTTTACTTAATTCTACA
sgRNA_01573	CRE13176	chr20:52464170-52464189	TCTCTGGGCACATTGGGTAA
sgRNA_01574	CRE13179	chr20:52532274-52532293	TGTGCGGTTCCCTAACGAGC
sgRNA_01575	CRE13179	chr20:52532458-52532477	TAAACTCAGACGCCCTCTGC
sgRNA_01576	CRE13179	chr20:52532424-52532443	GAGCATGTACACAATCACTT
sgRNA_01577	CRE13179	chr20:52532425-52532444	AGAGCATGTACACAATCACT
sgRNA_01578	CRE13179	chr20:52532632-52532651	CAAAAGTGAAACCGCTGACA
sgRNA_01579	CRE13181	chr20:52565675-52565694	TATTCTGATTGATGGAAGAC
sgRNA_01580	CRE13181	chr20:52565957-52565976	CAGTGACGTCCTCGTTAGTC
sgRNA_01581	CRE13181	chr20:52566127-52566146	GCTTGAAAGTCTTCGAGGCT
sgRNA_01582	CRE13181	chr20:52566122-52566141	GTCCAGCTTGAAAGTCTTCG
sgRNA_01583	CRE13181	chr20:52566127-52566146	AGCCTCGAAGACTTTCAAGC
sgRNA_01584	CRE13191	chr20:55926124-55926143	TTATAAATCCGCAACTGGCC
sgRNA_01585	CRE13191	chr20:55926262-55926281	CGACGATTTCCGGGCGACGC
sgRNA_01586	CRE13191	chr20:55926190-55926209	TACACCAGCAGTTTGCGAAT
sgRNA_01587	CRE13191	chr20:55926221-55926240	CGCATGTGCTGTCGCCTTGC
sgRNA_01588	CRE13191	chr20:55926494-55926513	GGTTAACGACGGGACGCGCG
sgRNA_01589	CRE13209	chr20:57227320-57227339	GATCTCTTGGCTAGAGTCAG
sgRNA_01590	CRE13209	chr20:57227318-57227337	AAGATCTCTTGGCTAGAGTC
sgRNA_01591	CRE13209	chr20:57227321-57227340	ATCTCTTGGCTAGAGTCAGG
sgRNA_01592	CRE13209	chr20:57227498-57227517	CGCTAACATTGGGAAGCATT
sgRNA_01593	CRE13209	chr20:57227702-57227721	GGCCGTTAAAAGAAAACGGG
sgRNA_01594	CRE13231	chr20:60696775-60696794	TGGAAAGCTGCGGCAGGCTT
sgRNA_01595	CRE13231	chr20:60697090-60697109	ACCCTGGGCGCCGCGAACAC
sgRNA_01596	CRE13231	chr20:60697088-60697107	CCTGGGCGCCGCGAACACGG
sgRNA_01597	CRE13231	chr20:60697168-60697187	CTGCGGTTTGCACGCTCAGT
sgRNA_01598	CRE13231	chr20:60697242-60697261	AGCACGAGACTGAGCGGGCG
sgRNA_01599	CRE13252	chr20:61585141-61585160	GCAGTGCCACCATCGGATGT
sgRNA_01600	CRE13252	chr20:61585352-61585371	ACTCAAACCAGCCGCCAGTG
sgRNA_01601	CRE13252	chr20:61585558-61585577	GCCCTTATTGGGTAGCGCCA
sgRNA_01602	CRE13252	chr20:61585562-61585581	TCCTTGGCGCTACCCAATAA
sgRNA_01603	CRE13252	chr20:61585563-61585582	ATCCTTGGCGCTACCCAATA
sgRNA_01604	CRE13266	chr20:62258234-62258253	CACGCGCCGCCGTCCAGTCA
sgRNA_01605	CRE13266	chr20:62258405-62258424	CCTTGTTGGGGATTCGGCGG
sgRNA_01606	CRE13266	chr20:62258392-62258411	CGCGGGCTTCGCTCCTTGTT
sgRNA_01607	CRE13266	chr20:62258391-62258410	CCGCGGGCTTCGCTCCTTGT
sgRNA_01608	CRE13266	chr20:62258847-62258866	GTAGGGTGCGCGGACTCACG
sgRNA_01609	CRE13271	chr20:62284794-62284813	GAGAGGAGTGGAGGGAGCGA
sgRNA_01610	CRE13271	chr20:62284798-62284817	GGAGTGGAGGGAGCGAGGGC
sgRNA_01611	CRE13271	chr20:62284818-62284837	GGGCGGGAGGCGGGCGCGGC
sgRNA_01612	CRE13271	chr20:62285001-62285020	GCAAGCGCCTGGCTGCGGAA
sgRNA_01613	CRE13271	chr20:62285099-62285118	AGCAGCTGTCCCGCTGTGAG
sgRNA_01614	CRE1328	chr1:155658251-155658270	TGACGTGCGCGCTACATGGC
sgRNA_01615	CRE1328	chr1:155658415-155658434	TGCGCTGGAGCCGGCTTGAC
sgRNA_01616	CRE1328	chr1:155658452-155658471	GCTTGGGCTCGCGCCGCTGA
sgRNA_01617	CRE1328	chr1:155658720-155658739	CCTCCCTGGGTTCGTCGCCG
sgRNA_01618	CRE1328	chr1:155658727-155658746	AGCGCCGCGGCGACGAACCC
sgRNA_01619	CRE13291	chr20:62709001-62709020	TACCACAGGGTGCGCCAGCC
sgRNA_01620	CRE13291	chr20:62709305-62709324	AGGGTGGCGGATGTGCACGG
sgRNA_01621	CRE13291	chr20:62709234-62709253	GGGGCCAATCAGTGCCCCGG
sgRNA_01622	CRE13291	chr20:62709251-62709270	GGTGTTCACAACTGCCTCCG
sgRNA_01623	CRE13291	chr20:62709523-62709542	TAGGGCCCCCAATACCCCCG
sgRNA_01624	CRE13314	chr21:15755437-15755456	CCATCACAGTCCCGCCGAAC
sgRNA_01625	CRE13314	chr21:15755663-15755682	TGGTCCTGCCGGCCGTTGCG
sgRNA_01626	CRE13314	chr21:15755658-15755677	CTGCCGGCCGTTGCGTGGAA
sgRNA_01627	CRE13314	chr21:15755656-15755675	CCTTCCACGCAACGGCCGGC
sgRNA_01628	CRE13314	chr21:15756171-15756190	TCGATTTATCCAAGGGATCA
sgRNA_01629	CRE13328	chr21:17682000-17682019	CGAACTTGCCTCTTCTTCAA
sgRNA_01630	CRE13328	chr21:17682181-17682200	ATGCATGACATACCCTGTGA
sgRNA_01631	CRE13328	chr21:17682182-17682201	AATGCATGACATACCCTGTG
sgRNA_01632	CRE13328	chr21:17682194-17682213	CATGCATTATAAGCAAAGGC
sgRNA_01633	CRE13328	chr21:17682307-17682326	TTTCTGAAATAGCCCAAGTC
sgRNA_01634	CRE13329	chr21:18984656-18984675	GAAAAAACACCGACGCGAAG
sgRNA_01635	CRE13329	chr21:18984915-18984934	CCGCCAGCGAGCCTTCGACG
sgRNA_01636	CRE13329	chr21:18985232-18985251	AGCCCCCTGCGCGCCGCTTT
sgRNA_01637	CRE13329	chr21:18985225-18985244	CAGCCCCAAAGCGGCGCGCA
sgRNA_01638	CRE13329	chr21:18985233-18985252	GAGCCCCCTGCGCGCCGCTT
sgRNA_01639	CRE13332	chr21:20230000-20230019	AGGCAAGACTGAAGGTGTGC
sgRNA_01640	CRE13332	chr21:20230071-20230090	TAGTACACGGTTTTCCTCGG
sgRNA_01641	CRE13332	chr21:20230074-20230093	TAATAGTACACGGTTTTCCT
sgRNA_01642	CRE13332	chr21:20230115-20230134	TTCTTCGACATTGCCGTCGA
sgRNA_01643	CRE13332	chr21:20230222-20230241	AGAGAAAGGATTTGGTTATA
sgRNA_01644	CRE13343	chr21:27011638-27011657	TCGGGGACGGGGATGTATGC
sgRNA_01645	CRE13343	chr21:27011848-27011867	AAACCAGACGAGGCGTCCGC
sgRNA_01646	CRE13343	chr21:27012039-27012058	TTCCCGCCCCAGAAGTTCAA
sgRNA_01647	CRE13343	chr21:27012049-27012068	CCGGGGGCCCTTGAACTTCT
sgRNA_01648	CRE13343	chr21:27012039-27012058	TTGAACTTCTGGGGCGGGAA
sgRNA_01649	CRE13356	chr21:30391521-30391540	GCGAGACTCACCTTGAGCCG
sgRNA_01650	CRE13356	chr21:30391750-30391769	GACACCAACACCGGCGGACG
sgRNA_01651	CRE13356	chr21:30391700-30391719	GCGCGTCCAAGGCCGCGGAC
sgRNA_01652	CRE13356	chr21:30391708-30391727	AAGGCCGCGGACCGGAAGCT
sgRNA_01653	CRE13356	chr21:30392000-30392019	AATTATCTGGGCATGGTGGT
sgRNA_01654	CRE13388	chr21:34638517-34638536	GGCGCCTTTCAAAGCTTGCG
sgRNA_01655	CRE13388	chr21:34638689-34638708	AGCTTGTCCGCGGCGGCTTC
sgRNA_01656	CRE13388	chr21:34638699-34638718	CGGACAAGCTCTCCCGGGCG
sgRNA_01657	CRE13388	chr21:34638699-34638718	CGCCCGGGAGAGCTTGTCCG
sgRNA_01658	CRE13388	chr21:34638866-34638885	ATCAGGGGCGGCATCTCGCG
sgRNA_01659	CRE13393	chr21:34851851-34851870	TGCCGCGCTGTCACGCCGTC
sgRNA_01660	CRE13393	chr21:34851992-34852011	GTTTTCCCTGCGTTCGGCGC
sgRNA_01661	CRE13393	chr21:34852164-34852183	CGCGCGCCTGAAGTCGGCGT
sgRNA_01662	CRE13393	chr21:34852155-34852174	CAAACGCCCACGCCGACTTC
sgRNA_01663	CRE13393	chr21:34852167-34852186	CCGACTTCAGGCGCGCGCGC
sgRNA_01664	CRE13394	chr21:34852307-34852326	TGTGCACCGCAGCGACCAAT
sgRNA_01665	CRE13394	chr21:34852411-34852430	GGGCGCTCCTCGCGACCAAT
sgRNA_01666	CRE13394	chr21:34852421-34852440	CTGCACGCCGATTGGTCGCG
sgRNA_01667	CRE13394	chr21:34852429-34852448	GCCACTTGCTGCACGCCGAT
sgRNA_01668	CRE13394	chr21:34852636-34852655	ACCGTGAGATTACGTGCGGA
sgRNA_01669	CRE13396	chr21:34914943-34914962	GCGCCAAGTTCAGTTTCGAC
sgRNA_01670	CRE13396	chr21:34915157-34915176	ATGGCGGACATAGTCGTGCG
sgRNA_01671	CRE13396	chr21:34915272-34915291	TCCAAAGGGAATGCCCGGTC
sgRNA_01672	CRE13396	chr21:34915256-34915275	GGTCCGGCCCGCTCCACCGA
sgRNA_01673	CRE13396	chr21:34915240-34915259	CTCACTGATTGGTCCCTCGG
sgRNA_01674	CRE13401	chr21:35320331-35320350	CACTACTCTCCGAAGCCGAT
sgRNA_01675	CRE13401	chr21:35320332-35320351	ACTACTCTCCGAAGCCGATT
sgRNA_01676	CRE13401	chr21:35320333-35320352	CAATCGGCTTCGGAGAGTAG
sgRNA_01677	CRE13401	chr21:35320614-35320633	CACTCAGGCATTGACATCGC
sgRNA_01678	CRE13401	chr21:35320841-35320860	TTGTGTATACTCCCCACGTA
sgRNA_01679	CRE13402	chr21:35348055-35348074	CAAGAGACAACCTTCATTGA
sgRNA_01680	CRE13402	chr21:35347980-35347999	AATGCAAATGTTACCATGAC
sgRNA_01681	CRE13402	chr21:35348249-35348268	GTGGTGGGCACCTATGCTGC
sgRNA_01682	CRE13402	chr21:35348757-35348776	GACTTTCAGTGCGTGGCTAT
sgRNA_01683	CRE13402	chr21:35348764-35348783	CAGCAGGGACTTTCAGTGCG
sgRNA_01684	CRE13414	chr21:36261373-36261392	CCTCTCCGGGTGCGGCGCGC
sgRNA_01685	CRE13414	chr21:36261402-36261421	GCCTGCCTGCAGCGGCTCGC
sgRNA_01686	CRE13414	chr21:36261369-36261388	TCCGGGTGCGGCGCGCCGGC
sgRNA_01687	CRE13414	chr21:36261709-36261728	CGCGCGGAGGGATCGAGCCG
sgRNA_01688	CRE13414	chr21:36261978-36261997	CGGCCGCCCGCACGCGAAGC
sgRNA_01689	CRE13418	chr21:36421044-36421063	ACCGAGGCATCTCTGCACCG
sgRNA_01690	CRE13418	chr21:36421258-36421277	TGTCTTGGTTTTCGCTCCGA
sgRNA_01691	CRE13418	chr21:36421467-36421486	AACCACAGGGTTTCGCAGCG
sgRNA_01692	CRE13418	chr21:36421421-36421440	AAAAAAAGCCAGCGCCGCCT
sgRNA_01693	CRE13418	chr21:36421462-36421481	CACCACGCTGCGAAACCCTG
sgRNA_01694	CRE13430	chr21:37546066-37546085	ATCAGGCTTGGTAGAGCACC
sgRNA_01695	CRE13430	chr21:37546389-37546408	AATTAGTGCTGCAGTGTGGT
sgRNA_01696	CRE13430	chr21:37546355-37546374	CAGGAGGCTCTGCTTTAAAC
sgRNA_01697	CRE13430	chr21:37546352-37546371	GAGGCTCTGCTTTAAACAGG
sgRNA_01698	CRE13430	chr21:37546459-37546478	TTCTTGCAGCCGATCTGTAA
sgRNA_01699	CRE13452	chr21:39848249-39848268	CACCAAGTGCCTCGCTTCAG
sgRNA_01700	CRE13452	chr21:39848422-39848441	AGCCGTCATCAGCCGTTAAG
sgRNA_01701	CRE13452	chr21:39848524-39848543	CTGTGCCCAGATGGGTTATC
sgRNA_01702	CRE13452	chr21:39848515-39848534	TTCAGCCCTGATAACCCATC
sgRNA_01703	CRE13452	chr21:39848516-39848535	TCAGCCCTGATAACCCATCT
sgRNA_01704	CRE1346	chr1:156265265-156265284	TCAGGAAACGCTACCCTTGC
sgRNA_01705	CRE1346	chr1:156265436-156265455	TACGGCCGCAATTCAGCCGA
sgRNA_01706	CRE1346	chr1:156265442-156265461	CGCAATTCAGCCGACGGAAG
sgRNA_01707	CRE1346	chr1:156265418-156265437	ACTCCACAGAGCCGCGCATA
sgRNA_01708	CRE1346	chr1:156265622-156265641	ACAAGTAATACAATTTAATA
sgRNA_01709	CRE1347	chr1:156308088-156308107	ACCTTGAGAGTAGCGGGTTG
sgRNA_01710	CRE1347	chr1:156308180-156308199	GTCTGGCCGTTCTTGCGTAG
sgRNA_01711	CRE1347	chr1:156308205-156308224	AGACAGAGAGCGCACGACGA
sgRNA_01712	CRE1347	chr1:156308434-156308453	CTTAGCCTTCACGGTCCGAT
sgRNA_01713	CRE1347	chr1:156308426-156308445	CGGCTCCTATCGGACCGTGA
sgRNA_01714	CRE13473	chr21:40817526-40817545	GACTGAGTGACCGGCGATAC
sgRNA_01715	CRE13473	chr21:40817832-40817851	CGTCACCGAAGACAAACGCG
sgRNA_01716	CRE13473	chr21:40817830-40817849	CTCGCGTTTGTCTTCGGTGA
sgRNA_01717	CRE13476	chr21:42733621-42733640	AGAGTGGCTCAGTCACTGGA
sgRNA_01718	CRE13476	chr21:42733972-42733991	AACGTGCAGCGGTAAGAGCG
sgRNA_01719	CRE13476	chr21:42733967-42733986	TTACCGCTGCACGTTCAGGA
sgRNA_01720	CRE13476	chr21:42733971-42733990	GCTCTTACCGCTGCACGTTC
sgRNA_01721	CRE13476	chr21:42734167-42734186	TCTGTGCACAAGGCTACTGT
sgRNA_01722	CRE13504	chr21:44299566-44299585	GGCGTTGTGCGGGCAGACGT
sgRNA_01723	CRE13504	chr21:44299563-44299582	GTTGTGCGGGCAGACGTTGG
sgRNA_01724	CRE13504	chr21:44299712-44299731	CTTGAGCATGCGCGGTACGT
sgRNA_01725	CRE13504	chr21:44299711-44299730	TTGAGCATGCGCGGTACGTG
sgRNA_01726	CRE13504	chr21:44300007-44300026	TTCATGTGAGCCACGGCCCC
sgRNA_01727	CRE13514	chr21:44766114-44766133	CTGTGAGTAAGAAAGCGCTC
sgRNA_01728	CRE13514	chr21:44766140-44766159	AGTCACGTGCAGCTGAGCGG
sgRNA_01729	CRE13514	chr21:44766113-44766132	ACTGTGAGTAAGAAAGCGCT
sgRNA_01730	CRE13514	chr21:44766316-44766335	GTCAGGGAGGCCCCGCTCAA
sgRNA_01731	CRE13514	chr21:44766467-44766486	CAGCTTGAAGTGAGCGTCTG
sgRNA_01732	CRE13528	chr21:45274925-45274944	CCCTCACTGCACCGCGCTCA
sgRNA_01733	CRE13528	chr21:45275136-45275155	AACACTAGAGGAGGTACTTC
sgRNA_01734	CRE13528	chr21:45275135-45275154	ACACTAGAGGAGGTACTTCA
sgRNA_01735	CRE13528	chr21:45275166-45275185	GACACTAGGCTTGTGTTTAG
sgRNA_01736	CRE13528	chr21:45275235-45275254	GACAAGTGAGCGTTAGATAA
sgRNA_01737	CRE13529	chr21:45285384-45285403	CTCCGCGGGGCGCGGGGCCT
sgRNA_01738	CRE13529	chr21:45285394-45285413	CGCGGGGCCTGGGAAGGCGC
sgRNA_01739	CRE13529	chr21:45285395-45285414	GCGGGGCCTGGGAAGGCGCG
sgRNA_01740	CRE13529	chr21:45285688-45285707	CGCCGCGCCCCGAAACCAGG
sgRNA_01741	CRE13529	chr21:45285830-45285849	GACCGGCGGCGCGTTTGCAC
sgRNA_01742	CRE13556	chr21:46708143-46708162	TACCCTCCCCACTGGCCTGC
sgRNA_01743	CRE13556	chr21:46707899-46707918	GATGGCGCATAACGCATGCG
sgRNA_01744	CRE13556	chr21:46707897-46707916	TGGCGCATAACGCATGCGCG
sgRNA_01745	CRE13569	chr21:47649056-47649075	GGGGCCTGGTGGGTGCGGGT
sgRNA_01746	CRE13569	chr21:47649057-47649076	GGGCCTGGTGGGTGCGGGTG
sgRNA_01747	CRE13569	chr21:47649063-47649082	CGCCCCCACCCGCACCCACC
sgRNA_01748	CRE13569	chr21:47649261-47649280	CGACAGCGAGTGCGAAGGTC
sgRNA_01749	CRE13569	chr21:47649457-47649476	TGAGCGCCGCGTAGCTTCGC
sgRNA_01750	CRE1357	chr1:156710504-156710523	CGGGGGCATGCAAGCTGCTC
sgRNA_01751	CRE1357	chr1:156710688-156710707	AGCTAGGCCTTGGCGATGTC
sgRNA_01752	CRE1357	chr1:156710810-156710829	CCTAGAGGTGCCCGTCCGAG
sgRNA_01753	CRE1357	chr1:156710850-156710869	ATCCGAAGTGCCGCGGAAAG
sgRNA_01754	CRE1357	chr1:156710808-156710827	CTCTCGGACGGGCACCTCTA
sgRNA_01755	CRE13570	chr21:47706108-47706127	GCGCCTCAAGTCTTTCCGAG
sgRNA_01756	CRE13570	chr21:47706330-47706349	AAAAACCCGCCCGGACGTAC
sgRNA_01757	CRE13570	chr21:47706323-47706342	CGCCCGGACGTACCGGTGTC
sgRNA_01758	CRE13570	chr21:47706321-47706340	CAGACACCGGTACGTCCGGG
sgRNA_01759	CRE13570	chr21:47706603-47706622	TGGAAGGATGCCGCGGAATC
sgRNA_01760	CRE1360	chr1:156736673-156736692	CTGGATGTGCACCCCGATCC
sgRNA_01761	CRE1360	chr1:156736919-156736938	TCTGGGAAGCTGGCGGATTG
sgRNA_01762	CRE1360	chr1:156737098-156737117	TTCGTCGCCTAACAATTCCG
sgRNA_01763	CRE1360	chr1:156737144-156737163	GAGAAACCCGCCTCTGACGC
sgRNA_01764	CRE1360	chr1:156737088-156737107	GTAGTCACCTCGGAATTGTT
sgRNA_01765	CRE13635	chr22:20099393-20099412	AGACATCAGCCATTCCCTTC
sgRNA_01766	CRE13635	chr22:20099617-20099636	ACTGCACCAGCTGGGGGCAT
sgRNA_01767	CRE13635	chr22:20099625-20099644	GTCTGGGAACTGCACCAGCT
sgRNA_01768	CRE13635	chr22:20099602-20099621	GGCATGGGGTGGAGAACACT
sgRNA_01769	CRE13635	chr22:20099826-20099845	TGTTGAGCAGTTGTTTATTC
sgRNA_01770	CRE13638	chr22:20193712-20193731	AAAAACCCAAGACCCTAGCA
sgRNA_01771	CRE13638	chr22:20193927-20193946	GGCCTCCTGTTGATACGGAA
sgRNA_01772	CRE13638	chr22:20193919-20193938	CACTTCCTTTCCGTATCAAC
sgRNA_01773	CRE13638	chr22:20193927-20193946	TTCCGTATCAACAGGAGGCC
sgRNA_01774	CRE13638	chr22:20194071-20194090	GGCCGAGCCTGTGTCACTCA
sgRNA_01775	CRE13645	chr22:20748196-20748215	GCACTACACTGATCCGCACA
sgRNA_01776	CRE13645	chr22:20748308-20748327	GCTAGATACTCGTTCGCGTC
sgRNA_01777	CRE13645	chr22:20748307-20748326	TGCTAGATACTCGTTCGCGT
sgRNA_01778	CRE13645	chr22:20748524-20748543	AAGCGGACAGAGACCGCCGA
sgRNA_01779	CRE13645	chr22:20748508-20748527	CCGGTCCCTCAGACCGTCGG
sgRNA_01780	CRE1365	chr1:157108116-157108135	GGCACGGTCCGTCTTCGGTC
sgRNA_01781	CRE1365	chr1:157108376-157108395	CCGTGCCGGGGCGGATGCGC
sgRNA_01782	CRE1365	chr1:157108365-157108384	CGGATGCGCGGGATGCGGGC
sgRNA_01783	CRE1365	chr1:157108368-157108387	CGCATCCCGCGCATCCGCCC
sgRNA_01784	CRE1365	chr1:157108638-157108657	GAGACTGTTTCCCGGCGCCT
sgRNA_01785	CRE13650	chr22:21213008-21213027	CGCCATCACCTCACGAGCCG
sgRNA_01786	CRE13650	chr22:21213013-21213032	CGCCGCGGCTCGTGAGGTGA
sgRNA_01787	CRE13650	chr22:21213202-21213221	CGGTTGCGCGCGCCGGATGT
sgRNA_01788	CRE13650	chr22:21213201-21213220	GCGGTTGCGCGCGCCGGATG
sgRNA_01789	CRE13650	chr22:21213648-21213667	CAGGGCTGGTGTGGACTCGC
sgRNA_01790	CRE13663	chr22:21983617-21983636	TGGTGCCCGTCCGCGTGCGT
sgRNA_01791	CRE13663	chr22:21983616-21983635	CTGGTGCCCGTCCGCGTGCG
sgRNA_01792	CRE13663	chr22:21983816-21983835	GAGGGTACTGTGAGGCCGTT
sgRNA_01793	CRE13663	chr22:21984427-21984446	GTTCTCGCCACCTAGCGGTC
sgRNA_01794	CRE13663	chr22:21984437-21984456	GGGCACGCCGGACCGCTAGG
sgRNA_01795	CRE13689	chr22:23558954-23558973	GACTTGGTAGGGACACCGGA
sgRNA_01796	CRE13689	chr22:23559161-23559180	TTTCTACCCCCGCTTAGATC
sgRNA_01797	CRE13689	chr22:23559151-23559170	GTCTTGCCCAGATCTAAGCG
sgRNA_01798	CRE13689	chr22:23559160-23559179	TTCTACCCCCGCTTAGATCT
sgRNA_01799	CRE13689	chr22:23559336-23559355	TGATCCTAGACCATTGGTAG
sgRNA_01800	CRE13703	chr22:24199697-24199716	GTCCTTACGGCCTCGGACGC
sgRNA_01801	CRE13703	chr22:24199999-24200018	GCGCTACAGCTTCGTCTCGA
sgRNA_01802	CRE13703	chr22:24200000-24200019	CGCTACAGCTTCGTCTCGAC
sgRNA_01803	CRE13703	chr22:24199990-24200009	AGCTGTAGCGCAAGCGCAGT
sgRNA_01804	CRE13703	chr22:24200204-24200223	TTCATACCATTCTAGATCGC
sgRNA_01805	CRE13715	chr22:24833815-24833834	AGAGCCAACCCGAAGGCTTC
sgRNA_01806	CRE13715	chr22:24833988-24834007	AGGGGTGTTGCAGAGCTGCC
sgRNA_01807	CRE13715	chr22:24833987-24834006	GGGGTGTTGCAGAGCTGCCT
sgRNA_01808	CRE13715	chr22:24833964-24833983	CCCTGGGCCACCTGCTTTGC
sgRNA_01809	CRE13715	chr22:24834048-24834067	AACTCACTATTGCCTGAGGC
sgRNA_01810	CRE13733	chr22:26690734-26690753	AAAGAATCAAATGAATCAGG
sgRNA_01811	CRE13733	chr22:26690984-26691003	TTTTGCCCATACAGTAAGAA
sgRNA_01812	CRE13733	chr22:26690502-26690521	CCAACCAGGCCAACTTTAGC
sgRNA_01813	CRE13733	chr22:26690414-26690433	CAGAGGCTGCCTCGTCTAGC
sgRNA_01814	CRE13733	chr22:26690426-26690445	CTGAGACTTCCTGCTAGACG
sgRNA_01815	CRE13733	chr22:26690503-26690522	CAACCAGGCCAACTTTAGCT
sgRNA_01816	CRE13733	chr22:26690514-26690533	CGCCAAAACCCAGCTAAAGT
sgRNA_01817	CRE13744	chr22:27530130-27530149	CGTTTGGAGAGCAACGCCCT
sgRNA_01818	CRE13744	chr22:27530272-27530291	CCCAGGACACAGTCGGAGCC
sgRNA_01819	CRE13744	chr22:27530420-27530439	CATCAGCTGCAGCGGCCTTT
sgRNA_01820	CRE13744	chr22:27530428-27530447	CAAATATCCATCAGCTGCAG
sgRNA_01821	CRE13744	chr22:27530418-27530437	CAAAAGGCCGCTGCAGCTGA
sgRNA_01822	CRE13748	chr22:28315135-28315154	TGGGTCTGTGGGCGCGAGCG
sgRNA_01823	CRE13748	chr22:28315358-28315377	CCGGGGTGGGGCACGAAACT
sgRNA_01824	CRE13748	chr22:28315359-28315378	CCCGGGGTGGGGCACGAAAC
sgRNA_01825	CRE13748	chr22:28315348-28315367	GCACGAAACTGGGCGGAGCT
sgRNA_01826	CRE13748	chr22:28315647-28315666	CCACATAAAAGACTCCTGAC
sgRNA_01827	CRE13751	chr22:29137657-29137676	CTACAGACAAAGCGAAGCTC
sgRNA_01828	CRE13751	chr22:29137864-29137883	TCCTCATTGGTCCGGCGGCA
sgRNA_01829	CRE13751	chr22:29137865-29137884	CTCCTCATTGGTCCGGCGGC
sgRNA_01830	CRE13751	chr22:29137860-29137879	CCCCTGCCGCCGGACCAATG
sgRNA_01831	CRE13751	chr22:29138206-29138225	TTGGAACTGCGGCGGCCCAT
sgRNA_01832	CRE13755	chr22:29207030-29207049	TAGTGTCATTTTTAATTGAC
sgRNA_01833	CRE13755	chr22:29207029-29207048	AGTGTCATTTTTAATTGACT
sgRNA_01834	CRE13755	chr22:29207048-29207067	TAAAAGGGCATGACAACAAA
sgRNA_01835	CRE13755	chr22:29207244-29207263	TTGTTTGAGAGAAGCTTAGC
sgRNA_01836	CRE13755	chr22:29207406-29207425	ACTACCAGTGCACGCCACCA
sgRNA_01837	CRE13763	chr22:29784336-29784355	TCCTAGGTGAGGGGTTTGCG
sgRNA_01838	CRE13763	chr22:29784606-29784625	TCAAGGGTACAACCCTGGCG
sgRNA_01839	CRE13763	chr22:29784601-29784620	CGGGGTCAAGGGTACAACCC
sgRNA_01840	CRE13763	chr22:29784581-29784600	CCTTCAGGCCTTGCGTCCAC
sgRNA_01841	CRE13763	chr22:29784833-29784852	GAGGGGCAGGGTTTTGCTCA
sgRNA_01842	CRE1377	chr1:158119483-158119502	AAGACCCGCGCCTGATGTCG
sgRNA_01843	CRE1377	chr1:158119619-158119638	TCCAAATCATTTCCCGGCCG
sgRNA_01844	CRE1377	chr1:158119643-158119662	AATTGGCTAAGACCGTTAGC
sgRNA_01845	CRE1377	chr1:158119646-158119665	TGGCTAAGACCGTTAGCTGG
sgRNA_01846	CRE1377	chr1:158119836-158119855	TCGAGTGTGGACTAGCTACG
sgRNA_01847	CRE13784	chr22:30701864-30701883	CCTTGTATCAGTGCGTTGAG
sgRNA_01848	CRE13784	chr22:30702332-30702351	TGATACCTCAACCCTCAGTC
sgRNA_01849	CRE13784	chr22:30702340-30702359	TAAAGCCAGACTGAGGGTTG
sgRNA_01850	CRE13784	chr22:30702291-30702310	CCAGTTTCCAAAGAACTCAC
sgRNA_01851	CRE13784	chr22:30702500-30702519	TCTTCTGAAGTTCCGGTTTG
sgRNA_01852	CRE13796	chr22:31476901-31476920	CTTAAACACTGACGCGAGAA
sgRNA_01853	CRE13796	chr22:31477083-31477102	GTGGCTTTAGCGAGTCGGGT
sgRNA_01854	CRE13796	chr22:31477084-31477103	GGTGGCTTTAGCGAGTCGGG
sgRNA_01855	CRE13796	chr22:31477085-31477104	CCGACTCGCTAAAGCCACCG
sgRNA_01856	CRE13796	chr22:31477169-31477188	TTTGACGGCCACGCCCCGAG
sgRNA_01857	CRE13804	chr22:31742157-31742176	CGGTGGCGCGGGCCGGGTCC
sgRNA_01858	CRE13804	chr22:31742301-31742320	GCTCCGTGTGTTCGGAGCGG
sgRNA_01859	CRE13804	chr22:31742298-31742317	CGGGCTCCGTGTGTTCGGAG
sgRNA_01860	CRE13804	chr22:31742300-31742319	CGCTCCGAACACACGGAGCC
sgRNA_01861	CRE13804	chr22:31742648-31742667	TGCTCTAGCATTGGCGGATC
sgRNA_01862	CRE13851	chr22:36902776-36902795	GTTGGGCACCCTCAAATTAG
sgRNA_01863	CRE13851	chr22:36903041-36903060	GGGAGGTTCGCGCGTTTCTC
sgRNA_01864	CRE13851	chr22:36903028-36903047	GTTTCTCAGGGTTCGGTCGG
sgRNA_01865	CRE13851	chr22:36903040-36903059	GGAGGTTCGCGCGTTTCTCA
sgRNA_01866	CRE13851	chr22:36903167-36903186	GTGCGCGGCGCGCGGCACGC
sgRNA_01867	CRE13867	chr22:37640011-37640030	GGGGACGCTTCCTTCTCCGA
sgRNA_01868	CRE13867	chr22:37640234-37640253	TGCGCCCGCAGAAACGCGCC
sgRNA_01869	CRE13867	chr22:37640346-37640365	CGCCCCCTGCAAACGACCGT
sgRNA_01870	CRE13867	chr22:37640338-37640357	CTCTCCCCACGGTCGTTTGC
sgRNA_01871	CRE13867	chr22:37640345-37640364	GCCCCCTGCAAACGACCGTG
sgRNA_01872	CRE13897	chr22:38796559-38796578	CCAAACTTTTCAGGGGGAAT
sgRNA_01873	CRE13897	chr22:38796703-38796722	GTGGTAGCTTTGGAGGGCAC
sgRNA_01874	CRE13897	chr22:38796637-38796656	AGCAACAAGGTCTGAGAGCC
sgRNA_01875	CRE13897	chr22:38796702-38796721	TGGTAGCTTTGGAGGGCACA
sgRNA_01876	CRE13897	chr22:38796791-38796810	TTAAAAGCTACAACATAATA
sgRNA_01877	CRE13899	chr22:38902185-38902204	GCTCCCGTCTCCGACGAGAG
sgRNA_01878	CRE13899	chr22:38902510-38902529	GCGCCACCCGAACTAGAACG
sgRNA_01879	CRE13899	chr22:38902511-38902530	CGCCACCCGAACTAGAACGT
sgRNA_01880	CRE13899	chr22:38902679-38902698	ACTTCTTCAAGCCGGCCGCG
sgRNA_01881	CRE13899	chr22:38902680-38902699	AACTTCTTCAAGCCGGCCGC
sgRNA_01882	CRE13903	chr22:39077655-39077674	CTCCCCTGAACTCTATTACC
sgRNA_01883	CRE13903	chr22:39077920-39077939	AAGCAGCTCTGTCCGCCGTT
sgRNA_01884	CRE13903	chr22:39077935-39077954	AGGTGAGCGCAGCCGAACGG
sgRNA_01885	CRE13903	chr22:39077888-39077907	CTCTCGCCCGGCTCGCGCCT
sgRNA_01886	CRE13903	chr22:39078234-39078253	GCCGAGCCCCACTGGAGCTA
sgRNA_01887	CRE13941	chr22:40720250-40720269	CTAGAGCAGGAGGTACCTCT
sgRNA_01888	CRE13941	chr22:40720363-40720382	CCCATTTCAAACTAACGAAA
sgRNA_01889	CRE13941	chr22:40720359-40720378	GCCTTTTCGTTAGTTTGAAA
sgRNA_01890	CRE13941	chr22:40720360-40720379	CCTTTTCGTTAGTTTGAAAT
sgRNA_01891	CRE13941	chr22:40720567-40720586	GAGTAGCTGCAGATGCTTTC
sgRNA_01892	CRE13953	chr22:41215384-41215403	TAGAACCACTTCCGGGTCGC
sgRNA_01893	CRE13953	chr22:41215478-41215497	GGGACAGCGAGGTGTTCGCG
sgRNA_01894	CRE13953	chr22:41215511-41215530	TGTCAGGCCGCCTTGCGCCT
sgRNA_01895	CRE13953	chr22:41215477-41215496	CGGGACAGCGAGGTGTTCGC
sgRNA_01896	CRE13953	chr22:41215727-41215746	AAAAAACTCACTTGTGGACT
sgRNA_01897	CRE13968	chr22:41843791-41843810	CTTGCGCCCGTTGCACGGTC
sgRNA_01898	CRE13968	chr22:41844027-41844046	CCTCACTCACAGTCCCCCGG
sgRNA_01899	CRE13968	chr22:41844453-41844472	TGCAGCGGGCATGTGCGGGA
sgRNA_01900	CRE13968	chr22:41844454-41844473	GTGCAGCGGGCATGTGCGGG
sgRNA_01901	CRE13968	chr22:41844457-41844476	AGGGTGCAGCGGGCATGTGC
sgRNA_01902	CRE13991	chr22:42792942-42792961	TCCCCAGGTGCACGCCCCCC
sgRNA_01903	CRE13991	chr22:42793001-42793020	GTGCCTTCCAGGCGTGGAGT
sgRNA_01904	CRE13991	chr22:42793350-42793369	ATCACAGCGCAGACATGCGT
sgRNA_01905	CRE13991	chr22:42793567-42793586	GGGGTAGTGACGGCACAAGT
sgRNA_01906	CRE13991	chr22:42793595-42793614	CTTGGCATGGATCCTCATTC
sgRNA_01907	CRE13998	chr22:43011042-43011061	CTCATCTGCATACGGAAGTT
sgRNA_01908	CRE13998	chr22:43011499-43011518	GCAACTGGCAGCCTGAGTAA
sgRNA_01909	CRE13998	chr22:43011515-43011534	TTGCTTGGCAGTCTTGTCGC
sgRNA_01910	CRE13998	chr22:43011485-43011504	CGTTGTTTTCTCCGTTACTC
sgRNA_01911	CRE140	chr1:9714289-9714308	TGCGTGGTCGGGAGTACCTC
sgRNA_01912	CRE140	chr1:9714434-9714453	TGAGATCACACGGGGTGCCA
sgRNA_01913	CRE140	chr1:9714673-9714692	CGGATGAAGCAATTCCCCTT
sgRNA_01914	CRE140	chr1:9714678-9714697	GAAGCAATTCCCCTTTGGCT
sgRNA_01915	CRE140	chr1:9714677-9714696	TGAAGCAATTCCCCTTTGGC
sgRNA_01916	CRE14001	chr22:43252849-43252868	ACACCCCCCGGCGAGCTCTT
sgRNA_01917	CRE14001	chr22:43253001-43253020	CGACGTGTCACAGGCCGCGC
sgRNA_01918	CRE14001	chr22:43253225-43253244	TTTCGTCGACTCTTACCGGT
sgRNA_01919	CRE14001	chr22:43253221-43253240	GTCGACTCTTACCGGTTGGC
sgRNA_01920	CRE14001	chr22:43253187-43253206	CGCGGCTCACAGCTGACGAT
sgRNA_01921	CRE14003	chr22:43410989-43411008	CAGGGGTCGCCGCGACGGTT
sgRNA_01922	CRE14003	chr22:43411254-43411273	CTACTCATCTGGCCCAATCG
sgRNA_01923	CRE14003	chr22:43411253-43411272	TACTCATCTGGCCCAATCGG
sgRNA_01924	CRE14003	chr22:43411282-43411301	CTCACCCCGCGTGAGGACGA
sgRNA_01925	CRE14003	chr22:43411417-43411436	GGTCCTTGAGACGCGCTTCC
sgRNA_01926	CRE14030	chr22:45636566-45636585	CATGCTGCGTGCCATAGCGG
sgRNA_01927	CRE14030	chr22:45636552-45636571	ACGGCCGCGCTCCTCCGCTA
sgRNA_01928	CRE14030	chr22:45636885-45636904	CGCCCCGCCTCTGAACGGCC
sgRNA_01929	CRE14030	chr22:45637118-45637137	ATCCCGTGGGGTAGCAGCGG
sgRNA_01930	CRE14030	chr22:45637131-45637150	TGACAAAGTACACATCCCGT
sgRNA_01931	CRE14033	chr22:45809002-45809021	TCCCTCAGGGTGTCGGAGGA
sgRNA_01932	CRE14033	chr22:45809632-45809651	CCGACGGAAAACTGCGCTAA
sgRNA_01933	CRE14033	chr22:45809606-45809625	TGTACCTCTGCGGCGTCACT
sgRNA_01934	CRE14033	chr22:45809806-45809825	CTTGCGGCAGGACGCCAACC
sgRNA_01935	CRE14033	chr22:45809802-45809821	GGCGTCCTGCCGCAAGTCCC
sgRNA_01936	CRE14035	chr22:46149077-46149096	CTGGGAAAAGAAACCGCGGG
sgRNA_01937	CRE14035	chr22:46149224-46149243	AGTGGACCCTCTAGGACCCG
sgRNA_01938	CRE14035	chr22:46149214-46149233	TTCATCTCCTCGGGTCCTAG
sgRNA_01939	CRE14035	chr22:46149215-46149234	TCATCTCCTCGGGTCCTAGA
sgRNA_01940	CRE14035	chr22:46149376-46149395	GAGAATCGCTTAATCCCGGG
sgRNA_01941	CRE14041	chr22:46453651-46453670	TCTGTGGTACGAGCCCAGCC
sgRNA_01942	CRE14041	chr22:46453851-46453870	ACGGGTCCCTTAACCATTCG
sgRNA_01943	CRE14041	chr22:46453849-46453868	GGGTCCCTTAACCATTCGAG
sgRNA_01944	CRE14041	chr22:46453835-46453854	GCCCGATGGTGCCCCTCGAA
sgRNA_01945	CRE14041	chr22:46453997-46454016	GATCCCCAGGGGAAACGGCC
sgRNA_01946	CRE14042	chr22:46525316-46525335	TGCAGGTCACCTCGGGTGGC
sgRNA_01947	CRE14042	chr22:46525448-46525467	GCTTGGCTGAGTGCCGCGTT
sgRNA_01948	CRE14042	chr22:46525431-46525450	GTAAATGCGGAAATACGGCT
sgRNA_01949	CRE14042	chr22:46525394-46525413	AGTGGCCCCTCTGCTTTACG
sgRNA_01950	CRE14042	chr22:46525586-46525605	CCCACCCTTAGGAAGGTCGT
sgRNA_01951	CRE14046	chr22:46692440-46692459	CGCGCGCGCTGCTTCACAGC
sgRNA_01952	CRE14046	chr22:46692444-46692463	CGCGCTGCTTCACAGCAGGT
sgRNA_01953	CRE14046	chr22:46692556-46692575	ACTAGGTATCCGCGTCAAGC
sgRNA_01954	CRE14046	chr22:46692686-46692705	GCGTCCTGACTACAATACCC
sgRNA_01955	CRE14046	chr22:46692686-46692705	GGGTATTGTAGTCAGGACGC
sgRNA_01956	CRE14060	chr22:47187056-47187075	GGCGTGGTGACATAAGCCTG
sgRNA_01957	CRE14060	chr22:47187330-47187349	GCATCTTCACTCACGCACGA
sgRNA_01958	CRE14060	chr22:47187336-47187355	TCACTCACGCACGATGGCTG
sgRNA_01959	CRE14073	chr22:50247916-50247935	TCCGCCCGGAAGCAACGGCG
sgRNA_01960	CRE14073	chr22:50248102-50248121	CGCGTCGCAAGGACCCGTCT
sgRNA_01961	CRE14073	chr22:50248103-50248122	GCGCGTCGCAAGGACCCGTC
sgRNA_01962	CRE14073	chr22:50248107-50248126	GGTCCTTGCGACGCGCCCCG
sgRNA_01963	CRE14073	chr22:50248247-50248266	AAACTGACTGCGAGCTCATT
sgRNA_01964	CRE14077	chr22:50329626-50329645	CGGAGGGGAGGGTGGAGGTC
sgRNA_01965	CRE14077	chr22:50329855-50329874	GGTCAAGGCCAACCGCGCTC
sgRNA_01966	CRE14077	chr22:50329902-50329921	ACTCCGCTTAGTCACGGCCC
sgRNA_01967	CRE14077	chr22:50329889-50329908	GCGGAGTCACCTGCCGCCAA
sgRNA_01968	CRE14077	chr22:50330139-50330158	GGGGGTGCGCCTCTTGATGC
sgRNA_01969	CRE14080	chr22:50355338-50355357	GGTCGTGCACCGCGACATTA
sgRNA_01970	CRE14080	chr22:50355499-50355518	CAGGCGTTAACCCGCCGGCA
sgRNA_01971	CRE14080	chr22:50355500-50355519	GCCGGCGGGTTAACGCCTGC
sgRNA_01972	CRE14080	chr22:50355504-50355523	CCCTGCAGGCGTTAACCCGC
sgRNA_01973	CRE14080	chr22:50355685-50355704	CCATCGCGTTGGGGGGTACG
sgRNA_01974	CRE14083	chr22:50523659-50523678	TTCATGGACGAAGTTGCCGA
sgRNA_01975	CRE14083	chr22:50523865-50523884	GCTCAGCAAACTTGAGCTGA
sgRNA_01976	CRE14083	chr22:50523869-50523888	AGCAAACTTGAGCTGAAGGC
sgRNA_01977	CRE14083	chr22:50524030-50524049	GACCCGAGCTCTGTGGCGAG
sgRNA_01978	CRE14083	chr22:50524087-50524106	GCTCAGAATGTGTACTTGGT
sgRNA_01979	CRE1411	chr1:160492899-160492918	ACTCAGTGACTACACCGATC
sgRNA_01980	CRE1411	chr1:160492981-160493000	ATGCTTTCCGCGGTGAAGAC
sgRNA_01981	CRE1411	chr1:160492991-160493010	TCAAGCACCAGTCTTCACCG
sgRNA_01982	CRE1411	chr1:160492998-160493017	GACTGGTGCTTGAGACCTTG
sgRNA_01983	CRE1411	chr1:160493232-160493251	CTTATATGTAAAAGTCTGTA
sgRNA_01984	CRE14111	chr22:51066554-51066573	AAGCGCCCGCAGCCCGGTAC
sgRNA_01985	CRE14111	chr22:51066499-51066518	TGACCAGCGGAGTCGGGCCG
sgRNA_01986	CRE14111	chr22:51066720-51066739	TGCGGTCTTGAAACGGGCTC
sgRNA_01987	CRE14111	chr22:51066741-51066760	GGGAGCTTCCTCTGCGCGGT
sgRNA_01988	CRE14111	chr22:51066909-51066928	GACCTGAGCGCGGAGCGTTA
sgRNA_01989	CRE14128	chr3:4626324-4626343	GAGTGGCAGCCTCCGCATTC
sgRNA_01990	CRE14128	chr3:4626483-4626502	ACACTCCAGAAATGAACTGC
sgRNA_01991	CRE14128	chr3:4626514-4626533	TAAGGGACTGTCCCCATCAT
sgRNA_01992	CRE14128	chr3:4626496-4626515	GGAGTGTAGGTGTGAAGTTA
sgRNA_01993	CRE14128	chr3:4626680-4626699	CCACTGTCAGAGTGTATTAC
sgRNA_01994	CRE14129	chr3:4793267-4793286	TTAAGGATTGCACAACTTCT
sgRNA_01995	CRE14129	chr3:4793524-4793543	AGGCGCCTCATGTACACACT
sgRNA_01996	CRE14129	chr3:4793720-4793739	TGATCAAAAGTCTAAAACCC
sgRNA_01997	CRE14129	chr3:4793739-4793758	AAGATGGCTCTGACACTGAA
sgRNA_01998	CRE14129	chr3:4793738-4793757	CAAGATGGCTCTGACACTGA
sgRNA_01999	CRE14130	chr3:4872591-4872610	AAAATGTTCCATCGTTTAGG
[truncated: 7,423 more rows]
