# Supplementary material for: Noncoding Variants Connect Enhancer Dysregulation with Nuclear Receptor Signaling in Hematopoietic Malignancies
Source: Oxford University Press journal article supplement (doi:10.1158/2159-8290.cd-19-1128), 2020-03-18
Supplement: 21598290cd191128-sup-229452_2_supp_6126679_q6fhz7.xlsx [file 21598290cd191128-sup-229452_2_supp_6126679_q6fhz7.xlsx]

## Sheet: KRAS
CRE ID	Chromosome	Coordinates	Mutation ID	Ref	Alt	Sample ID	Cancer Type
CRE4399	12	25538690	COSN7324473	G	A	.	Pancreas
CRE4399	12	25539230	COSN17370253	G	C	.	Oesophagus
CRE4399	12	25539234	COSN8707012	C	A	.	Ovary
CRE4399	12	25539267	COSN20875763	G	C	.	Breast
CRE4399	12	25539268	COSN24098768	G	C	.	Breast
CRE4399	12	25538690	MU7678914	G	A	.	Pancreas
CRE4399	12	25539230	MU33224869	G	C	.	Esophagus
CRE4399	12	25539234	MU7087840	C	A	.	Ovary
CRE4399	12	25539237	MU57706820	C	T	.	Skin
CRE4399	12	25539267	MU64283949	G	C	.	Breast
CRE4399	12	25539268	MU68481243	G	C	.	Breast
CRE4399	12	25539290	MU52093402	T	C	.	Lung
CRE4399	12	25539321	MU42734992	C	A	.	Lung
CRE4399	12	25539267	NA	G	C	PD5935a	Breast
CRE4399	12	25538781	NA	C	T	SRR191046	T-ALL
CRE4399	12	25538984	NA	G	A	SRR191232	T-ALL
CRE4399	12	25539515	NA	CAG	C	SRR191046	T-ALL
CRE4399	12	25538881	NA	C	T	4212T	AML
CRE4399	12	25538905	NA	T	C	3496T-MDS	MDS
CRE4399	12	25539150	NA	G	A	3491T	AML

## Sheet: PER2
CRE ID	Chromosome	Coordinates	Mutation ID	Ref	Alt	Sample ID	Cancer Type
CRE12661	2	239142853	COSN1832737	C	A	.	Liver
CRE12661	2	239142853	COSN1832738	C	A	.	Liver
CRE12661	2	239143160	COSN15508938	C	G	.	Ovary
CRE12661	2	239143160	COSN8991252	C	G	.	Ovary
CRE12661	2	239143176	COSN24093780	G	C	.	Breast
CRE12661	2	239142853	MU3445260	C	A	.	Liver
CRE12661	2	239142980	MU6773725	A	AT	.	Pancreas
CRE12661	2	239143014	MU48239083	G	A	.	Skin
CRE12661	2	239143061	MU57519488	G	A	.	Skin
CRE12661	2	239143067	MU58179667	G	A	.	Skin; Liver
CRE12661	2	239143072	MU52313130	G	A	.	Skin
CRE12661	2	239143160	MU5202655	C	G	.	Ovary
CRE12661	2	239143176	MU68639973	G	C	.	Breast
CRE12661	2	239143256	MU48771392	G	A	.	Skin
CRE12661	2	239142998	NA	A	AC	4212T	AML
CRE12661	2	239143268	NA	C	A	3236T-MDS	MDS
